# Supplementary material for: Evaluating the effect of TLR4-overexpressing on the transcriptome profile in ovine peripheral blood mononuclear cells
Source: J Biol Res (Thessalon). 2020 Jul 29;27:13. doi: 10.1186/s40709-020-00124-3 (PMC7392728; doi:10.1186/s40709-020-00124-3)
Supplement: Supplementary file 3 — Additional file 3. Differential expression of the mRNA in ovine Peripheral Blood Mononuclear Cells for Tg and WT individuals. [file 40709_2020_124_MOESM3_ESM.xlsx]

## Sheet: List
Additional file 3: Differentially expression of mRNA in ovine Peripheral Blood Mononuclear Cells for Tg and WT individuals
	Table 1 Differential expression of known gene in ovine Peripheral Blood Mononuclear Cells for Tg and WT individuals
	Table 2 Differential expression of novel transcript in ovine Peripheral Blood Mononuclear Cells for Tg and WT individuals

## Sheet: Table 1
Table 1 Differential expression of known gene in ovine Peripheral Blood Mononuclear Cells for Tg and WT individuals
gene_id	Tg_1_count	Tg_2_count	Tg_3_count	WT_1_count	WT_2_count	WT_3_count	Tg_1_fpkm	Tg_2_fpkm	Tg_3_fpkm	WT_1_fpkm	WT_2_fpkm	WT_3_fpkm	AVER-read-Tg	AVER-read-WT	log2FoldChange	pvalue	padj	baseMean	gene_name	gene_chr	gene_start	gene_end	gene_strand	gene_length	gene_biotype	gene_description	tf_family
ENSOARG00000007475	346	367	427	1281	1490	844	5.02274	4.78586	5.23769	14.5116	17.657	12.2789	380	1205	-1.56376	3.20887e-15	2.81065e-11	765.334	ADAMTS18	14	3911735	4062645	-	3678	protein_coding	PF08686:PLAC (protease and lacunin) domain|PF00090:Thrombospondin type 1 domain|PF01421:Reprolysin (M12B) family zinc metalloprotease|PF01562:Reprolysin family propeptide|PF05986:ADAM-TS Spacer 1	TSP_1
ENSOARG00000013560	348	141	100	13	17	13	27.5266	10.0189	6.68374	0.802447	1.09771	1.03055	196.333	14.3333	3.91532	9.2135e-13	3.56506e-09	111.233	-	2	188970099	188970776	+	675	pseudogene	PF03821:Golgi 4-transmembrane spanning transporter	-
ENSOARG00000009395	1656	2317	1657	781	887	639	106.143	133.409	89.7431	39.0646	46.4111	41.0474	1876.67	769	1.37933	1.01754e-12	3.56506e-09	1327.62	-	20	26989277	26991381	+	833	protein_coding	PF06623:MHC_I C-terminus|PF07654:Immunoglobulin C1-set domain	C1-set
ENSOARG00000008908	3396	3616	2622	1678	1120	1013	306.801	293.458	200.156	118.299	82.5988	91.7175	3211.33	1270.33	1.45059	7.74839e-12	2.26227e-08	2258.51	PYCARD	24	27279014	27280168	-	591	protein_coding	PF00619:Caspase recruitment domain|PF02758:PAAD/DAPIN/Pyrin domain	CARD
ENSOARG00000009973	4516	5528	4394	2803	1944	1850	78.6427	86.4771	64.6564	38.0915	27.6355	32.2872	4812.67	2199	1.22849	9.88908e-12	2.47481e-08	3513.99	EMILIN2	23	37418880	37475839	+	3066	protein_coding	PF07546:EMI domain|PF00386:C1q domain	-
ENSOARG00000012448	234	104	38	4	9	0	1.53788	0.614001	0.211027	0.0205148	0.0482854	0	125.333	4.33333	5.05984	7.23695e-10	1.58471e-06	69.0227	-	14	13204057	13214020	+	8124	protein_coding	-	-
ENSOARG00000019688	3301	4575	5391	9349	9304	8482	402.391	500.982	555.289	889.34	925.846	1036.23	4422.33	9045	-0.966882	4.06395e-09	7.91025e-06	6601.59	-	2	165042588	165043025	-	438	protein_coding	PF00467:KOW motif|PF16906:Ribosomal proteins L26 eukaryotic, L24P archaeal	KOW
ENSOARG00000012646	374	286	222	93	83	81	14.9578	10.2752	7.50231	2.90254	2.70982	3.24664	294	85.6667	1.8851	6.97239e-09	1.12709e-05	194.107	GPRC5C	11	55962126	55968492	-	1335	protein_coding	PF00003:7 transmembrane sweet-taste receptor of 3 GCPR	7tm_3
ENSOARG00000001778	62	97	97	505	655	168	1.52128	2.13805	2.01111	9.66962	13.1198	4.13124	85.3333	442.667	-2.24825	7.20334e-09	1.12709e-05	248.136	-	21	47746255	47802320	+	2176	protein_coding	-	-
ENSOARG00000002036	1572	3673	2057	6916	11057	5742	190.323	399.473	210.436	653.421	1092.8	696.715	2434	7905	-1.6106	7.7207e-09	1.12709e-05	5002.33	GNLY	JH921966.1	10371	12785	-	441	protein_coding	PF05184:Saposin-like type B, region 1	-
ENSOARG00000005949	2479	2802	2736	4918	5676	4538	54.6035	55.4423	50.9222	84.5343	102.059	100.176	2672.33	5044	-0.833449	9.12462e-09	1.22958e-05	3795.16	TMC6	11	53018172	53036753	+	2424	protein_coding	PF07810:TMC domain	-
ENSOARG00000004224	439	211	79	39	10	27	32.9664	14.2337	5.01281	2.28545	0.613019	2.032	243	25.3333	3.40461	1.81292e-08	2.26849e-05	141.96	-	9	78987981	79008771	-	711	protein_coding	PF03821:Golgi 4-transmembrane spanning transporter	-
ENSOARG00000010899	421	442	490	255	231	203	19.4279	18.3229	19.1067	9.18298	8.70206	9.38843	451	229.667	1.05981	2.08007e-07	0.000227741	340.359	MRPS11	18	18662393	18673460	+	1157	protein_coding	PF00411:Ribosomal protein S11	-
ENSOARG00000019515	102	106	130	343	291	248	1.20407	1.12405	1.2967	3.15969	2.8042	2.93397	112.667	294	-1.29572	3.34809e-07	0.000327426	198.077	PLB1	3	35327956	35449712	+	4523	protein_coding	PF00657:GDSL-like Lipase/Acylhydrolase	Lipase_GDSL
ENSOARG00000014841	328	248	784	164	114	102	37.6615	25.5802	76.0653	14.6949	10.6855	11.7376	453.333	126.667	1.90799	3.47447e-07	0.000327426	286.929	-	6	88733090	88746948	+	465	protein_coding	PF00048:Small cytokines (intecrine/chemokine), interleukin-8 like	-
ENSOARG00000019924	1601	1755	1728	1167	1081	656	173.741	171.087	158.454	98.8286	95.7643	71.3459	1694.67	968	0.918428	3.55895e-07	0.000327426	1323.41	BCL2L15	1	90335281	90339845	-	492	protein_coding	-	-
ENSOARG00000021045	163	218	112	460	502	666	6.12019	7.35296	3.55338	13.4783	15.3868	25.0614	164.333	542.667	-1.66328	3.73817e-07	0.000327426	352.712	GATM	7	62077980	62092965	+	1422	protein_coding	-	-
ENSOARG00000006030	6716	7058	6466	12073	12199	10833	82.4893	77.8749	67.1073	115.718	122.314	133.349	6746.67	11701.7	-0.707655	9.87602e-07	0.000823848	9102.58	AKNA	2	9311734	9352831	+	4347	protein_coding	PF12443:AT-hook-containing transcription factor	-
ENSOARG00000020158	76	170	171	466	821	272	0.3719	0.747291	0.707058	1.7795	3.27961	1.33393	139	519.667	-1.80713	1.04166e-06	0.000829448	313.738	PTPRB	3	148947442	149071453	+	10911	protein_coding	PF00102:Protein-tyrosine phosphatase|PF00041:Fibronectin type III domain	Y_phosphatase
ENSOARG00000018382	30	32	49	0	1	0	5.1837	4.96703	7.1542	0	0.141054	0	37	0.333333	6.75829	1.50478e-06	0.00114612	18.851	-	11	50318674	50319888	+	309	protein_coding	PF04868:Retinal cGMP phosphodiesterase, gamma subunit	-
ENSOARG00000008800	106	103	128	274	284	289	2.92938	2.55703	2.989	5.90909	6.407	8.00426	112.333	282.333	-1.26026	3.31802e-06	0.00223558	194.526	-	20	26649266	26651197	-	1932	protein_coding	PF00012:Hsp70 protein	HSP70
ENSOARG00000020892	2458	3192	3446	5404	5959	4145	53.8743	62.8479	63.8207	92.4304	106.62	91.0495	3032	5169.33	-0.684508	4.97867e-06	0.00323023	4009.49	SLC20A1	3	60147289	60215812	-	2436	protein_coding	PF01384:Phosphate transporter family	-
ENSOARG00000003690	45	26	28	146	86	366	0.631112	0.327564	0.331817	1.59789	0.984598	5.14433	33	199.333	-2.58269	5.47667e-06	0.00342644	119.94	-	3	206931552	206966074	-	3807	protein_coding	PF00530:Scavenger receptor cysteine-rich domain	SRCR
ENSOARG00000005894	49	119	39	169	322	492	0.997032	2.17515	0.670539	2.68349	5.34854	10.033	69	327.667	-2.23123	6.51396e-06	0.00380372	200.916	CDH20	23	60261625	60309873	+	2624	protein_coding	PF00028:Cadherin domain	Cadherin
ENSOARG00000015610	526	494	437	268	283	224	8.85658	7.47199	6.2174	3.5214	3.88986	3.77992	485.667	258.333	1.00932	7.0844e-06	0.00390572	374.036	SGSM2	11	22950339	22967440	+	3171	protein_coding	PF02759:RUN domain|PF00566:Rab-GTPase-TBC domain	TBC
ENSOARG00000000760	140	55	50	290	409	302	2.1585	0.761756	0.65139	3.48917	5.14771	4.66643	81.6667	333.667	-1.90295	7.21341e-06	0.00390572	204.33	-	JH924201.1	5989	9938	+	3463	protein_coding	-	-
ENSOARG00000019308	270	391	393	870	628	666	14.1055	18.3498	17.3486	35.4687	26.7826	34.8701	351.333	721.333	-0.962663	7.35751e-06	0.00390572	525.092	BTLA	1	175586573	175619634	-	1022	protein_coding	-	-
ENSOARG00000012516	4	1	0	46	57	25	0.0789823	0.0177378	0	0.708807	0.91878	0.494725	1.66667	42.6667	-4.51939	8.29007e-06	0.00427133	20.9901	SLC6A1	19	54949631	54964101	+	2704	protein_coding	PF00209:Sodium:neurotransmitter symporter family	SNF
ENSOARG00000016470	432	288	500	1292	964	636	13.083	7.83512	12.795	30.5342	23.8324	19.3035	406.667	964	-1.1294	1.20985e-05	0.00605546	662.146	EGR1	5	47225278	47227722	+	1763	protein_coding	PF11928:Domain of unknown function (DUF3446)|PF11914:Domain of unknown function (DUF3432)	-
ENSOARG00000018210	79	157	115	297	404	238	1.47482	2.63293	1.81408	4.3268	6.15685	4.45288	117	313	-1.33424	1.93459e-05	0.00941392	208.639	TIMP3	3	176462578	176519533	+	2860	protein_coding	PF00965:Tissue inhibitor of metalloproteinase	-
ENSOARG00000012746	594	1539	1333	3492	2687	1954	5.09804	11.8654	9.66704	23.3879	18.8257	16.8072	1155.33	2711	-1.14813	2.10081e-05	0.00994649	1863.7	IGSF1	X	98298423	98322570	+	6221	protein_coding	PF13895:Immunoglobulin domain	-
ENSOARG00000006251	519	179	517	163	171	65	5.06683	1.56982	4.26487	1.24181	1.3628	0.635969	405	133	1.74592	2.76816e-05	0.0127612	270.435	CD109	8	273763	410091	+	5469	protein_coding	PF00207:Alpha-2-macroglobulin family|PF10569:Alpha-macro-globulin thiol-ester bond-forming region|PF07678:A-macroglobulin complement component|PF07677:A-macroglobulin receptor|PF07703:Alpha-2-macroglobulin family N-terminal region|PF01835:MG2 domain	A2M_comp
ENSOARG00000005780	68	200	135	384	468	285	2.12319	5.6097	3.56173	9.35647	11.9287	8.91824	134.333	379	-1.41786	4.08281e-05	0.0178807	248.193	EMP2	24	9258704	9268208	-	1710	protein_coding	PF00822:PMP-22/EMP/MP20/Claudin family	-
ENSOARG00000019163	21030	17988	25924	372646	93214	73515	1150.45	883.972	1198.33	15908.3	4162.69	4030.48	21647.3	179792	-2.89948	5.63287e-05	0.0240675	93345.4	-	15	47565510	47567511	+	976	protein_coding	PF00042:Globin	-
ENSOARG00000012909	510	318	328	231	165	147	8.82657	4.94399	4.7967	3.11985	2.33116	2.54972	385.333	181	1.21184	6.30231e-05	0.0262866	286.537	HK2	3	96625648	96669143	+	3085	protein_coding	PF00349:Hexokinase|PF03727:Hexokinase	-
ENSOARG00000019043	533	516	275	1951	1647	516	95.8181	83.3295	41.7734	273.702	241.702	92.9659	441.333	1371.33	-1.46425	6.50573e-05	0.026504	861.625	-	JH922521.1	2724	3046	+	297	protein_coding	PF07654:Immunoglobulin C1-set domain	C1-set
ENSOARG00000019521	0	5	7	24	181	14	0	0.579262	0.762818	2.41539	19.0556	1.8095	4	73	-4.09772	7.19582e-05	0.0286492	35.6787	-	7	22440867	22441478	+	414	protein_coding	PF07686:Immunoglobulin V-set domain	V-set
ENSOARG00000008646	5	0	0	48	91	10	0.431975	0	0	3.23616	6.41795	0.865848	1.66667	49.6667	-4.6715	7.44255e-05	0.028973	23.6876	C13orf46	10	86234213	86244589	-	618	protein_coding	-	-
ENSOARG00000007318	300	616	341	962	779	1441	3.88683	7.16941	3.73315	9.72634	8.23907	18.7108	419	1060.67	-1.30903	7.79642e-05	0.0296908	741.394	ID3	2	242185986	242190773	+	4121	protein_coding	PF00010:Helix-loop-helix DNA-binding domain	HLH
ENSOARG00000015695	34	29	16	175	182	45	0.459577	0.352133	0.182745	1.84594	2.00825	0.609601	26.3333	134	-2.17583	8.03686e-05	0.0299552	75.4331	EFHB	1	275206299	275266603	-	3950	protein_coding	PF13499:EF-hand domain pair	-
ENSOARG00000014486	2762	3000	3178	2471	1403	1679	89.1051	86.9418	86.6322	62.2088	36.949	54.2854	2980	1851	0.775274	0.000104588	0.0369708	2408.06	-	8	57937815	57962047	-	1655	protein_coding	PF00795:Carbon-nitrogen hydrolase	CN_hydrolase
ENSOARG00000000916	76	11	21	4	2	0	6.79698	0.883738	1.58697	0.279166	0.146015	0	36	2	4.38809	0.000107633	0.0369708	20.2179	TNFAIP8L3	7	56364017	56364613	+	597	protein_coding	PF05527:Domain of unknown function (DUF758)	-
ENSOARG00000017919	1382	722	1018	770	371	330	23.7107	11.1276	14.7581	10.3093	5.1961	5.6742	1040.67	490.333	1.22528	0.000111733	0.037641	770.064	SHTN1	22	36233341	36328514	-	3112	protein_coding	-	-
ENSOARG00000002203	4005	2095	2497	1086	1399	1644	126.755	59.5627	66.777	26.822	36.1448	52.1455	2865.67	1376.33	1.1366	0.000119449	0.0389397	2171.24	-	AMGL01121378.1	425	7307	+	1687	protein_coding	PF00641:Zn-finger in Ran binding protein and others|PF00076:RNA recognition motif. (a.k.a. RRM, RBD, or RNP domain)	zf-RanBP
ENSOARG00000013258	5315	5298	5652	3657	4651	2509	77.345	69.258	69.4989	41.5293	55.2512	36.5918	5421.67	3605.67	0.695265	0.000120033	0.0389397	4483.76	TBC1D8	3	100311451	100398643	+	3669	protein_coding	PF02893:GRAM domain|PF00566:Rab-GTPase-TBC domain	TBC
ENSOARG00000005263	328	239	319	186	165	101	4.92619	3.22451	4.04832	2.17997	2.02296	1.52024	295.333	150.667	1.08768	0.000135028	0.042979	222.783	PLEKHA7	15	35167366	35252525	+	3555	protein_coding	PF00169:PH domain	PH
ENSOARG00000002321	356	146	212	53	81	102	9.54675	3.51712	4.80384	1.10913	1.7732	2.74132	238	78.6667	1.67113	0.000152866	0.0469707	163.473	-	JH923608.1	21	4174	+	1991	protein_coding	-	-
ENSOARG00000003259	613	1029	832	1301	1710	1837	30.6454	46.2114	35.146	50.7555	69.786	92.0382	824.667	1616	-0.923569	0.000155514	0.0469707	1212.02	PON2	4	12512339	12539560	-	1068	protein_coding	PF01731:Arylesterase	-
ENSOARG00000012641	1215	1403	1402	1164	653	640	54.1497	56.1702	52.7977	40.483	23.7574	28.586	1340	819	0.812224	0.000164528	0.048288	1072.19	-	11	55921436	55946573	-	1198	protein_coding	PF07686:Immunoglobulin V-set domain|PF15330:SHP2-interacting transmembrane adaptor protein, SIT	V-set
ENSOARG00000013449	1412	2073	1717	3043	3402	2261	37.9414	50.0388	38.9849	63.8089	74.6242	60.8882	1734	2902	-0.6512	0.000191944	0.0538459	2267.33	AK3	2	72480101	72499884	-	1987	protein_coding	PF00406:Adenylate kinase|PF05191:Adenylate kinase, active site lid	ADK
ENSOARG00000020239	245	201	195	123	117	78	2.34176	1.72584	1.57492	0.917447	0.91291	0.747178	213.667	106	1.12614	0.000193646	0.0538459	160.544	OBSL1	2	220453801	220475937	-	5586	protein_coding	PF13927:Immunoglobulin domain|PF07679:Immunoglobulin I-set domain|PF00047:Immunoglobulin domain	I-set
ENSOARG00000002325	648	1029	784	498	520	478	61.0195	87.0438	62.3816	36.5951	39.9727	45.1102	820.333	498.667	0.791118	0.000206739	0.0565884	658.461	-	5	14194159	14196643	+	567	protein_coding	-	-
ENSOARG00000004466	19	62	4	1	0	1	0.382956	1.12257	0.0681242	0.0157288	0	0.0201999	28.3333	0.666667	5.4908	0.000220045	0.0585604	14.9049	MAPK4	23	50401577	50463212	+	2649	protein_coding	PF00069:Protein kinase domain	Pkinase
ENSOARG00000000421	81	190	174	1242	1743	242	8.95395	18.8674	16.2527	107.14	157.287	26.8101	148.333	1075.67	-2.72514	0.00022063	0.0585604	566.789	BEX4	X	122074179	122074995	-	483	protein_coding	PF04538:Brain expressed X-linked like family	-
ENSOARG00000000394	582	370	665	325	342	159	21.715	12.4013	20.9655	9.46282	10.4167	5.94549	539	275.333	1.08974	0.000228704	0.0597975	404.868	CCDC102A	14	24931676	24942837	-	1431	protein_coding	PF01576:Myosin tail	Myosin_tail_1
ENSOARG00000000443	1834	3015	2957	4025	5083	4320	23.1876	34.243	31.5903	39.712	52.4617	54.7385	2602	4476	-0.722452	0.000247387	0.0619104	3484.09	-	14	58280886	58289700	-	4223	protein_coding	PF13906:C-terminus of AA_permease|PF13520:Amino acid permease	-
ENSOARG00000026780	147	210	228	567	588	229	3.31866	4.25886	4.34938	9.98916	10.8365	5.18125	195	461.333	-1.12616	0.000258186	0.0630091	313.835	-	22	50826786	50829290	-	2365	lincRNA	-	-
ENSOARG00000002912	539	212	713	149	231	197	14.5566	5.14321	16.2707	3.14019	5.09271	5.332	488	192.333	1.40797	0.000258971	0.0630091	342.416	LRRN2	12	1647968	1650240	-	1977	protein_coding	PF13855:Leucine rich repeat	-
ENSOARG00000006202	9583	9003	8700	7530	7093	5484	1160.22	979.161	890.029	711.432	701.027	665.41	9095.33	6702.33	0.54317	0.000275218	0.0645195	7875.35	CST3	13	41296119	41299663	-	441	protein_coding	PF00031:Cystatin domain	-
ENSOARG00000012512	609	2056	1648	894	637	485	8.68013	26.3245	19.8478	9.94367	7.41165	6.92794	1437.67	672	1.17529	0.000281525	0.0645195	1036.83	-	11	55837716	55848306	+	3746	protein_coding	PF07686:Immunoglobulin V-set domain	V-set
ENSOARG00000025473	10	9	5	21	20	183	0.718601	0.580977	0.303602	1.17763	1.17323	13.1793	8	74.6667	-3.2764	0.000284586	0.0645195	44.4519	-	12	77920132	77921048	+	743	lincRNA	-	-
ENSOARG00000008178	2437	1743	1392	5194	2996	3520	295.049	189.568	142.405	490.727	296.106	427.105	1857.33	3903.33	-0.95423	0.00029045	0.0645195	2838.67	-	21	49751580	49752838	-	441	protein_coding	PF04505:Interferon-induced transmembrane protein	-
ENSOARG00000008205	1084	851	726	671	472	417	31.3187	22.0868	17.7239	15.1286	11.1323	12.0744	887	520	0.889867	0.000290808	0.0645195	707.246	IGSF8	1	109444609	109448988	-	1848	protein_coding	PF07686:Immunoglobulin V-set domain	V-set
ENSOARG00000012705	250	203	352	189	67	55	5.29683	3.86368	6.30181	3.12491	1.15882	1.16786	268.333	103.667	1.49924	0.00029096	0.0645195	184.311	ALDH1A1	2	63232708	63288217	+	2520	protein_coding	PF00171:Aldehyde dehydrogenase family	Aldedh
ENSOARG00000009152	10	7	11	294	8	436	0.249146	0.156668	0.231576	5.71613	0.162709	10.8867	9.33333	246	-4.71642	0.000297995	0.0652535	130.303	-	11	20719581	20721806	-	2143	protein_coding	PF00009:Elongation factor Tu GTP binding domain|PF03144:Elongation factor Tu domain 2|PF03143:Elongation factor Tu C-terminal domain	GTP_EFTU
ENSOARG00000001101	6733	7203	6327	9858	20286	9987	1597.73	1535.45	1268.64	1825.51	3929.68	2375.11	6754.33	13377	-0.885967	0.00030234	0.0653231	9861.02	GNG11	4	11124376	11128973	+	225	protein_coding	-	-
ENSOARG00000016089	2600	2692	1768	3846	5951	3908	108.878	101.268	62.5598	125.683	203.434	164.012	2353.33	4568.33	-0.855507	0.000305771	0.0653231	3414.32	TUBB1	13	56677136	56682027	-	1275	protein_coding	PF00091:Tubulin/FtsZ family, GTPase domain|PF03953:Tubulin C-terminal domain	Tubulin
ENSOARG00000003452	289	171	285	868	478	399	29.059	15.4457	24.2144	68.1086	39.2353	40.2076	248.333	581.667	-1.10473	0.000316418	0.0667833	401.639	RAMP2	11	42288243	42289793	+	531	protein_coding	PF04901:Receptor activity modifying family	-
ENSOARG00000011125	2542	2348	2529	6200	7471	2398	36.5632	30.3386	30.7372	69.5922	87.7231	34.5678	2473	5356.33	-0.97617	0.000324969	0.0677714	3759.37	RBM6	19	50197876	50280996	-	3712	protein_coding	-	-
ENSOARG00000014263	28	53	39	142	146	77	0.224034	0.380943	0.263674	0.886633	0.953619	0.617447	40	121.667	-1.50129	0.000340447	0.0701641	77.6407	SYDE2	1	61570310	61611616	-	6673	protein_coding	PF00620:RhoGAP domain	RhoGAP
ENSOARG00000011171	382	851	848	1435	1326	1277	10.9478	21.909	20.5356	32.0934	31.0223	36.6782	693.667	1346	-0.901236	0.000345308	0.0703384	998.012	ITK	5	66177401	66239168	+	1863	protein_coding	PF00018:SH3 domain|PF00017:SH2 domain|PF00169:PH domain|PF07714:Protein tyrosine kinase|PF00779:BTK motif	Pkinase_Tyr
ENSOARG00000017648	867	406	372	364	184	164	6.35166	2.67192	2.30281	2.08099	1.10041	1.20411	548.333	237.333	1.3656	0.000361381	0.0719654	400.272	TXNDC16	7	11381714	11480793	+	7288	protein_coding	PF00085:Thioredoxin|PF13848:Thioredoxin-like domain	-
ENSOARG00000009172	1296	2417	1959	3396	3376	2979	137.294	230.013	175.359	280.746	291.954	316.279	1890.67	3250.33	-0.711923	0.000361511	0.0719654	2523.23	CD3D	15	28516680	28519879	-	504	protein_coding	PF16680:T-cell surface glycoprotein CD3 delta chain|PF02189:Immunoreceptor tyrosine-based activation motif	-
ENSOARG00000009059	0	0	0	1	1	67	0	0	0	0.0139024	0.0145431	1.19624	0	23	-7.0865	0.000376758	0.0738455	12.81	PCDH7	6	49839231	49848437	+	2997	protein_coding	PF08266:Cadherin-like|PF08374:Protocadherin|PF00028:Cadherin domain	Cadherin
ENSOARG00000000785	180	272	369	474	716	485	8.89868	12.0795	15.4144	18.2865	28.8957	24.0297	273.667	558.333	-0.966857	0.000411044	0.0782682	406.425	-	JH922713.1	7141	9746	-	1080	protein_coding	PF15332:Lck-interacting transmembrane adapter 1	-
ENSOARG00000002265	32	106	62	183	154	279	0.895464	2.66461	1.46601	3.99622	3.51792	7.82449	66.6667	205.333	-1.60507	0.000471717	0.0870644	135.831	-	JH921597.1	1231	3346	+	1908	protein_coding	PF07686:Immunoglobulin V-set domain	V-set
ENSOARG00000005756	25	0	59	0	1	0	0.583903	0	1.16439	0	0.0190663	0	28	0.333333	6.33856	0.000474224	0.0870644	14.1313	BRINP1	2	4115880	4262567	+	2286	protein_coding	PF01823:MAC/Perforin domain	-
ENSOARG00000019457	67	72	102	281	150	162	0.583092	0.56289	0.750083	1.9084	1.06566	1.41296	80.3333	197.667	-1.20985	0.00047712	0.0870644	134.808	SLC38A4	3	139520648	139569216	+	6135	protein_coding	PF01490:Transmembrane amino acid transporter protein	Aa_trans
ENSOARG00000004669	33	20	35	229	78	59	1.09166	0.594336	0.978336	5.91165	2.10637	1.95604	29.3333	122	-1.90936	0.000486138	0.0877955	71.3604	SLC22A1	8	82967383	83002611	+	1614	protein_coding	PF00083:Sugar (and other) transporter	Sugar_tr
ENSOARG00000002268	11	49	13	174	37	182	0.134458	0.538045	0.134272	1.65975	0.369201	2.22956	24.3333	131	-2.39688	0.000498713	0.0885621	77.3377	-	JH922124.1	28	8341	-	4368	protein_coding	-	-
ENSOARG00000018691	169	368	234	499	570	538	9.25462	18.1029	10.8277	21.3242	25.4808	29.5262	257	535.667	-0.998007	0.000500494	0.0885621	390.42	-	3	179392086	179398501	-	975	protein_coding	PF05461:Apolipoprotein L	-
ENSOARG00000016412	32	31	30	93	127	68	2.25105	1.95896	1.78321	5.10526	7.29298	4.79399	31	96	-1.52441	0.0005068	0.088756	61.547	PDGFB	3	214647932	214666037	-	759	protein_coding	PF00341:PDGF/VEGF domain|PF04692:Platelet-derived growth factor, N terminal region	-
ENSOARG00000020667	91	105	13	17	14	6	1.04555	1.08373	0.12621	0.152424	0.13131	0.069089	69.6667	12.3333	2.66445	0.000520485	0.0892271	42.3643	FCGR1A	1	98816248	98827299	+	4647	protein_coding	PF13895:Immunoglobulin domain	-
ENSOARG00000013541	0	0	0	27	22	2	0	0	0	0.349478	0.297882	0.033246	0	17	-6.35497	0.000524626	0.0892271	7.66927	-	17	70586629	70594240	+	3219	protein_coding	PF00043:Glutathione S-transferase, C-terminal domain|PF02798:Glutathione S-transferase, N-terminal domain	GST_N
ENSOARG00000004802	871	987	1148	2081	3803	1017	131.369	133.727	146.306	244.932	468.238	153.726	1002	2300.33	-1.07659	0.000533094	0.0897956	1583.02	-	18	33692339	33695247	-	354	protein_coding	PF00089:Trypsin	Trypsin
ENSOARG00000002291	593	1451	824	543	338	519	95.9439	210.891	112.651	68.5587	44.6422	84.1557	956	466.667	1.08894	0.000544415	0.0908291	711.753	RETN	5	14185287	14186266	+	330	protein_coding	PF06954:Resistin	-
ENSOARG00000011372	192	24	14	10	3	14	12.5168	1.40551	0.771201	0.508737	0.159654	0.914691	76.6667	9	3.22299	0.000601531	0.0984825	46.5592	BATF2	21	42526284	42531851	-	819	protein_coding	PF00170:bZIP transcription factor	bZIP_1
ENSOARG00000022952	0	0	0	1	33	17	0	0	0	0.158424	5.46892	3.45878	0	17	-6.47326	0.000611451	0.0991796	8.35595	RF02101	20	45991565	45991827	-	263	misc_RNA	-	-
ENSOARG00000020830	1234	1380	680	770	520	529	114.385	114.911	53.2611	55.6987	39.3481	49.1432	1098	606.333	0.969407	0.000638679	0.102528	859.349	HEBP1	3	201751176	201787081	+	576	protein_coding	PF04832:SOUL heme-binding protein	-
ENSOARG00000018657	99	134	17	29	12	6	3.7488	4.55818	0.543943	0.856951	0.370941	0.2277	83.3333	15.6667	2.59084	0.0006438	0.102528	50.7967	-	3	178926557	178937917	+	1410	protein_coding	PF05461:Apolipoprotein L	-
ENSOARG00000014532	165	191	219	103	100	102	2.56842	2.67082	2.88054	1.25118	1.27072	1.59124	191.667	101.667	0.984307	0.000657286	0.102929	146.714	ETS2	1	269209042	269224554	+	3430	protein_coding	PF00178:Ets-domain|PF02198:Sterile alpha motif (SAM)/Pointed domain	Ets
ENSOARG00000014846	744	746	954	637	629	421	33.6927	30.348	36.5055	22.5114	23.2531	19.1073	814.667	562.333	0.630845	0.000661071	0.102929	682.008	-	14	56432056	56437313	-	1179	protein_coding	PF13895:Immunoglobulin domain|PF07686:Immunoglobulin V-set domain	V-set
ENSOARG00000004963	359	134	160	115	89	48	25.9374	8.69693	9.76785	6.48381	5.24915	3.47558	217.667	84	1.53954	0.000663946	0.102929	153.988	RAB7B	12	3013618	3031185	-	739	protein_coding	PF00071:Ras family	Ras
ENSOARG00000002737	161	136	126	90	43	18	8.65672	6.56894	5.7246	3.77633	1.88739	0.969959	141	50.3333	1.64843	0.000699866	0.107546	95.775	-	JH922964.1	2	5874	-	993	protein_coding	PF02841:Guanylate-binding protein, C-terminal domain|PF02263:Guanylate-binding protein, N-terminal domain	-
ENSOARG00000020553	257	428	422	657	694	592	3.22334	4.8222	4.47231	6.43041	7.10557	7.44129	369	647.667	-0.7435	0.000733679	0.110798	498.634	BCL9	1	97700556	97714424	+	4257	protein_coding	PF11502:B-cell lymphoma 9 protein	-
ENSOARG00000000464	0	0	0	13	10	15	0	0	0	0.308634	0.248351	0.457346	0	12.6667	-6.04727	0.000783977	0.117121	6.22345	IL20RA	8	62006022	62039859	-	1755	protein_coding	PF09294:Interferon-alpha/beta receptor, fibronectin type III|PF01108:Tissue factor	-
ENSOARG00000004465	24	25	27	72	81	81	3.53005	3.30323	3.35568	8.26424	9.72572	11.9401	25.3333	78	-1.55317	0.00078892	0.117121	50.9205	-	21	41778954	41790846	-	363	protein_coding	-	-
ENSOARG00000018510	3	0	9	35	51	28	0.151826	0	0.38487	1.38227	2.10698	1.42016	4	38	-3.18022	0.000808692	0.119048	20.0974	SNCA	6	34845703	34995530	+	1055	protein_coding	PF01387:Synuclein	-
ENSOARG00000007845	235	375	193	371	833	688	2.15032	3.08245	1.49224	2.64917	6.22225	6.30925	267.667	630.667	-1.17446	0.000830229	0.1212	446.891	TRIM58	5	38816862	38836192	+	5835	protein_coding	PF13765:SPRY-associated domain|PF15227:zinc finger of C3HC4-type, RING|PF00622:SPRY domain|PF00643:B-box zinc finger	SPRY
ENSOARG00000001131	231	700	527	1124	890	1073	3.49888	9.52455	6.74489	13.2857	11.0046	16.2881	486	1029	-1.0362	0.000861621	0.124743	743.846	-	4	112226366	112232825	+	3525	protein_coding	PF04548:AIG1 family	-
ENSOARG00000009423	53	109	52	113	358	190	1.34944	2.49306	1.11874	2.24521	7.44094	4.84826	71.3333	220.333	-1.55074	0.000908427	0.12793	142.967	SLC13A4	4	99257660	99299502	-	2097	protein_coding	PF00939:Sodium:sulfate symporter transmembrane region	Na_sulph_symp
ENSOARG00000013374	52	50	47	123	153	98	0.429183	0.370713	0.327781	0.792218	1.03085	0.810624	49.6667	124.667	-1.22703	0.000921343	0.12793	85.0929	CAPN5	15	54618564	54660989	+	6469	protein_coding	PF00648:Calpain family cysteine protease|PF00168:C2 domain|PF01067:Calpain large subunit, domain III	Peptidase_C2
ENSOARG00000001539	225	215	338	140	86	147	9.26946	7.95681	11.7662	4.50091	2.89226	6.06936	259.333	124.333	1.11079	0.000921559	0.12793	192.383	CADM1	15	25196640	25337564	-	1296	protein_coding	PF07686:Immunoglobulin V-set domain|PF08205:CD80-like C2-set immunoglobulin domain|PF13927:Immunoglobulin domain	V-set
ENSOARG00000019840	868	768	634	526	532	419	45.0382	35.7974	27.797	21.2984	22.5341	21.7886	756.667	492.333	0.725771	0.000935238	0.12793	626.906	PTAFR	2	238089357	238090385	+	1029	protein_coding	PF00001:7 transmembrane receptor (rhodopsin family)	7tm_1
ENSOARG00000014244	583	459	344	827	1250	749	28.9021	20.441	14.4101	31.9939	50.5868	37.2131	462	942	-0.912059	0.000941527	0.12793	691.244	CCR3	19	53052747	53053823	-	1077	protein_coding	PF00001:7 transmembrane receptor (rhodopsin family)	7tm_1
ENSOARG00000001869	816	982	766	722	467	477	62.3289	67.3814	49.4396	43.0365	29.1194	36.515	854.667	555.333	0.720266	0.000967347	0.129359	703.457	TREM1	20	15223394	15237353	-	699	protein_coding	PF07686:Immunoglobulin V-set domain	V-set
ENSOARG00000011381	507	363	451	204	353	161	16.7927	10.8006	12.6222	5.27281	9.54449	5.3443	440.333	239.333	0.993633	0.000986134	0.130872	340.314	PKNOX2	21	27906165	28117142	+	1612	protein_coding	PF16493:N-terminal of Homeobox Meis and PKNOX1|PF05920:Homeobox KN domain	Coprinus_mating
ENSOARG00000002795	5	59	20	113	56	269	0.179168	1.8992	0.605574	3.15987	1.63812	9.66043	28	146	-2.42309	0.00100304	0.131129	89.2487	-	JH924297.1	21	2168	+	1490	protein_coding	-	-
ENSOARG00000021012	1298	592	585	550	324	364	14.7109	6.02718	5.6023	4.86437	2.99761	4.13446	825	412.667	1.13295	0.00102883	0.133313	631.299	OLR1	3	204447104	204461390	+	4711	protein_coding	PF00059:Lectin C-type domain	Lectin_C
ENSOARG00000001579	392	834	595	986	1209	1267	24.3086	46.4588	31.1772	47.7145	61.2021	78.7415	607	1154	-0.879233	0.00103496	0.133313	871.846	-	4	112710761	112712561	+	861	protein_coding	PF04548:AIG1 family	-
ENSOARG00000008243	861	572	554	305	517	279	16.0456	9.57584	8.72386	4.4356	7.86519	5.21087	662.333	367	0.969886	0.00108321	0.138509	519.421	NOD1	4	65825914	65865183	+	2865	protein_coding	PF00619:Caspase recruitment domain|PF05729:NACHT domain	NACHT
ENSOARG00000008948	604	701	555	364	457	378	10.3995	10.8423	8.07448	4.89076	6.42329	6.52259	620	399.667	0.717019	0.00112971	0.141904	511.244	KIF17	2	244806621	244857308	+	3101	protein_coding	PF00225:Kinesin motor domain	Kinesin
ENSOARG00000000155	274	103	395	126	123	60	10.9584	3.70051	13.3487	3.93248	4.01575	2.40492	257.333	103	1.4327	0.00113407	0.141904	179.092	CPM	3	150801360	150873795	+	1335	protein_coding	PF13620:Carboxypeptidase regulatory-like domain|PF00246:Zinc carboxypeptidase	-
ENSOARG00000002042	344	625	375	912	816	742	5.03616	8.21958	4.63894	10.4192	9.75209	10.8868	448	823.333	-0.795521	0.00114837	0.142675	624.297	CYBRD1	2	137043196	137060543	-	3647	protein_coding	PF03188:Eukaryotic cytochrome b561	Cytochrom_B561
ENSOARG00000004627	5	8	0	4	98	61	0.946668	1.36065	0	0.591	15.1468	11.5747	4.33333	54.3333	-3.57412	0.00120152	0.148226	29.2024	-	11	13984486	13985622	-	282	protein_coding	-	-
ENSOARG00000017912	29	73	51	159	74	272	0.247185	0.558955	0.367318	1.0576	0.5149	2.32353	51	168.333	-1.72613	0.0012108	0.148327	110.984	CLCN1	4	106136579	106176458	+	6264	protein_coding	PF00654:Voltage gated chloride channel	Voltage_CLC
ENSOARG00000012170	587	1022	699	1357	1403	1164	24.3521	38.0871	24.5032	43.9317	47.5141	48.3955	769.333	1308	-0.68569	0.00131574	0.159414	1020.64	TNFRSF25	12	45012176	45016283	+	1287	protein_coding	PF00531:Death domain|PF00020:TNFR/NGFR cysteine-rich region	Death
ENSOARG00000017216	36	144	54	163	227	324	0.431451	1.55032	0.546852	1.52446	2.22086	3.89159	78	238	-1.59146	0.00131993	0.159414	158.311	STAG3	24	36088439	36117300	-	4455	protein_coding	PF08514:STAG domain	-
ENSOARG00000017752	47	50	42	114	120	107	1.60244	1.53138	1.20999	3.03312	3.33989	3.65614	46.3333	113.667	-1.20857	0.00133369	0.159414	78.7034	AMIGO2	3	139261110	139262675	+	1566	protein_coding	PF13855:Leucine rich repeat	-
ENSOARG00000007382	9737	13946	8784	8034	7148	7037	128.906	165.854	98.2625	83.0005	77.2502	93.3662	10822.3	7406.33	0.631627	0.00135015	0.159414	9118.28	SDS	17	60686049	60693139	+	4033	protein_coding	PF00291:Pyridoxal-phosphate dependent enzyme	PALP
ENSOARG00000010070	4114	5173	3086	3664	2452	1365	197.709	223.323	125.316	137.41	96.1944	65.7429	4124.33	2493.67	0.866433	0.00135078	0.159414	3285.48	FCGR3A	1	111039478	111049403	-	1111	protein_coding	PF13895:Immunoglobulin domain	-
ENSOARG00000011761	883	1053	711	1634	1927	1112	19.2744	20.648	13.114	27.8338	34.3375	24.3264	882.333	1557.67	-0.707193	0.0013559	0.159414	1193.57	NAALADL1	21	42577458	42590533	-	2446	protein_coding	PF02225:PA domain|PF04389:Peptidase family M28|PF04253:Transferrin receptor-like dimerisation domain	TFR_dimer
ENSOARG00000006439	342	299	401	214	240	199	2.21227	1.73745	2.19181	1.08025	1.26733	1.29009	347.333	217.667	0.756043	0.00137618	0.160719	282.237	ARHGAP5	18	41435464	41496691	+	8254	protein_coding	PF00620:RhoGAP domain|PF16512:p190-A and -B Rho GAPs FF domain|PF01846:FF domain	RhoGAP
ENSOARG00000014875	1136	950	1112	782	900	498	30.9614	23.2592	25.6091	16.6322	20.024	13.6027	1066	726.667	0.665573	0.00141775	0.164478	891.136	-	14	56516001	56543412	-	1959	protein_coding	PF07686:Immunoglobulin V-set domain|PF13895:Immunoglobulin domain	V-set
ENSOARG00000012484	718	495	655	334	518	247	4.13812	2.56278	3.18982	1.50219	2.43711	1.42669	622.667	366.333	0.880022	0.00142833	0.164615	494.208	PRUNE2	2	59415552	59648297	+	9264	protein_coding	PF12496:Bcl2-/adenovirus E1B nineteen kDa-interacting protein 2|PF13716:Divergent CRAL/TRIO domain|PF02833:DHHA2 domain	-
ENSOARG00000002699	189	327	315	494	470	580	19.004	29.5365	26.7633	38.7623	38.5786	58.4472	277	514.667	-0.848055	0.00149925	0.169583	391.919	-	AMGL01125509.1	189	1665	-	531	protein_coding	PF00229:TNF(Tumour Necrosis Factor) family	-
ENSOARG00000009716	49	124	78	138	330	200	1.83852	4.17948	2.47294	4.04065	10.1077	7.52065	83.6667	222.667	-1.34997	0.00150048	0.169583	150.085	EXOC3L2	14	51965906	51978303	-	1423	protein_coding	PF06046:Exocyst complex component Sec6	-
ENSOARG00000009490	43	7	29	1	4	3	0.50726	0.0741804	0.289073	0.00920582	0.0385202	0.035468	26.3333	2.66667	3.40006	0.00151973	0.170658	15.0866	-	19	28743089	28823970	-	4526	protein_coding	PF01501:Glycosyl transferase family 8	Glyco_transf_8
ENSOARG00000007271	226	357	203	185	139	70	13.3628	18.9621	10.1422	8.53613	6.70919	4.14802	262	131.333	1.12588	0.00154932	0.172873	195.337	HAAO	3	81285872	81299658	+	903	protein_coding	PF06052:3-hydroxyanthranilic acid dioxygenase	-
ENSOARG00000015083	143	205	141	234	478	349	1.40972	1.81543	1.17453	1.80017	3.84674	3.44808	163	353.667	-1.04739	0.00157176	0.174266	255.556	GSTA4	20	24996933	25013919	-	5416	protein_coding	PF14497:Glutathione S-transferase, C-terminal domain|PF02798:Glutathione S-transferase, N-terminal domain	GST_N
ENSOARG00000008659	619	1047	1360	802	599	285	1.52549	2.31789	2.83207	1.54238	1.20507	0.703909	1008.67	562	0.950137	0.00159185	0.175384	767.408	NEB	2	156650358	156853665	+	21665	protein_coding	PF00880:Nebulin repeat|PF14604:Variant SH3 domain	-
ENSOARG00000003728	40	22	19	5	0	4	1.97748	0.977022	0.793694	0.192896	0	0.198183	27	3	3.27266	0.00166951	0.182316	15.6236	-	3	2617192	2634288	+	1080	protein_coding	PF03414:Glycosyltransferase family 6	-
ENSOARG00000009944	1157	1683	1665	2319	3511	1835	87.2523	114.013	106.097	136.472	216.143	138.686	1501.67	2555	-0.677139	0.00167558	0.182316	1977.63	RGS18	12	11242784	11271360	-	708	protein_coding	PF00615:Regulator of G protein signaling domain	RGS
ENSOARG00000011185	12	18	9	42	65	50	1.43334	1.93139	0.908361	3.91488	6.33795	5.98539	13	52.3333	-1.92788	0.00170654	0.183887	32.0598	AVPI1	22	18064568	18065934	-	447	protein_coding	PF15063:Thyroid cancer protein 1	-
ENSOARG00000013900	471	337	611	352	298	211	8.34362	5.36281	9.14579	4.86605	4.30939	3.74601	473	287	0.820885	0.00171102	0.183887	377.047	ZDHHC21	2	82688515	82742907	-	3014	protein_coding	PF01529:DHHC palmitoyltransferase	-
ENSOARG00000002089	0	3	2	33	16	17	0	0.360623	0.226142	3.44602	1.74779	2.27985	1.66667	22	-3.64533	0.00185116	0.197735	11.2491	-	AMGL01120087.1	1534	2124	+	399	protein_coding	PF07686:Immunoglobulin V-set domain	V-set
ENSOARG00000013873	0	2	0	10	10	37	0	0.0819879	0	0.356116	0.372527	1.69218	0.666667	19	-4.86381	0.00187334	0.197782	10.2295	RGS20	9	34741563	34788644	+	1170	protein_coding	PF00615:Regulator of G protein signaling domain	RGS
ENSOARG00000020128	0	0	0	15	5	14	0	0	0	0.410903	0.143279	0.492526	0	11.3333	-5.88615	0.00187418	0.197782	5.56552	-	AMGL01128345.1	21	2225	+	1521	protein_coding	-	-
ENSOARG00000000285	248	285	385	203	180	179	2.05354	2.11995	2.69376	1.31174	1.21672	1.48545	306	187.333	0.776742	0.00190508	0.198288	245.344	INSR	5	13733596	13879145	-	6448	protein_coding	PF00757:Furin-like cysteine rich region|PF01030:Receptor L domain|PF07714:Protein tyrosine kinase|PF00041:Fibronectin type III domain	Pkinase_Tyr
ENSOARG00000004424	2150	4380	3314	5423	5811	5116	34.5242	63.1812	44.966	67.9555	76.1733	82.3321	3281.33	5450	-0.666474	0.00191228	0.198288	4291.99	SYTL3	8	81713928	81795338	+	3325	protein_coding	PF02318:FYVE-type zinc finger|PF00168:C2 domain	C2
ENSOARG00000007547	153	147	146	221	422	280	19.176	16.5506	15.462	21.6152	43.1764	35.1705	148.667	307.667	-0.966255	0.00191293	0.198288	225.155	-	10	15065088	15067047	-	426	protein_coding	PF01166:TSC-22/dip/bun family	-
ENSOARG00000019538	7	21	24	86	24	125	0.285083	0.768284	0.825909	2.73321	0.797906	5.10197	17.3333	78.3333	-2.18969	0.0019251	0.198376	48.1678	-	7	22516407	22518234	-	1311	protein_coding	PF07686:Immunoglobulin V-set domain	V-set
ENSOARG00000015759	1791	1903	2001	2897	2919	2281	43.3281	41.3563	40.9042	54.6919	57.6468	55.3036	1898.33	2699	-0.417259	0.00194448	0.199201	2263.06	MKRN2	19	56393699	56433070	-	2207	protein_coding	-	-
ENSOARG00000010484	132	408	3065	128	107	93	17.9332	49.7935	351.853	13.5705	11.8668	12.6625	1201.67	109.333	3.4622	0.00199524	0.203095	629.48	-	24	16387268	16391608	-	393	protein_coding	PF00410:Ribosomal protein S8	-
ENSOARG00000020555	77	70	117	182	188	182	3.27846	2.67735	4.20932	6.04715	6.53437	7.76612	88	184	-0.998759	0.00201379	0.203095	133.797	ACP6	1	97736746	97757600	-	1254	protein_coding	PF00328:Histidine phosphatase superfamily (branch 2)	Acid_phosphat_A
ENSOARG00000002511	8	2	16	37	36	70	0.298488	0.0670341	0.504433	1.07731	1.09649	2.61751	8.66667	47.6667	-2.45238	0.00201727	0.203095	28.3164	-	AMGL01121266.1	1227	5895	+	1431	protein_coding	PF00005:ABC transporter	ABC_tran
ENSOARG00000021050	168	178	246	367	493	260	16.3386	15.5508	20.2156	27.8529	39.1397	25.3414	197.333	373.333	-0.826106	0.00206406	0.205688	277.342	-	3	204808148	204813367	+	549	protein_coding	PF00059:Lectin C-type domain	Lectin_C
ENSOARG00000005274	0	0	0	9	5	19	0	0	0	0.298321	0.173372	0.808814	0	11	-5.89829	0.00206651	0.205688	5.62393	CPA3	1	237343563	237375474	-	1257	protein_coding	PF00246:Zinc carboxypeptidase|PF02244:Carboxypeptidase activation peptide	-
ENSOARG00000011915	475	966	854	598	463	366	15.54	28.3898	23.6081	15.2671	12.3653	12.0003	765	475.667	0.768641	0.00212241	0.210058	611.676	TBXAS1	4	103073102	103237978	+	1632	protein_coding	PF00067:Cytochrome P450	p450
ENSOARG00000019108	20365	17162	13838	13750	11702	10820	703.773	532.776	404.081	370.81	330.122	374.739	17121.7	12090.7	0.608287	0.00217992	0.214141	14672.3	SARS	1	85679981	85699849	+	1545	protein_coding	PF02403:Seryl-tRNA synthetase N-terminal domain|PF00587:tRNA synthetase class II core domain (G, H, P, S and T)	tRNA-synt_2b
ENSOARG00000004234	42	157	108	203	222	384	1.01377	3.40424	2.20273	3.82374	4.37433	9.28916	102.333	269.667	-1.39683	0.0021881	0.214141	186.416	SLC45A3	12	2724330	2738876	-	2212	protein_coding	PF07690:Major Facilitator Superfamily	MFS_1
ENSOARG00000019966	470	638	429	382	224	304	22.9801	28.0223	17.7239	14.5753	8.94064	14.8964	512.333	303.333	0.839586	0.00221398	0.215141	409.051	-	3	42406932	42409249	-	1092	protein_coding	PF07992:Pyridine nucleotide-disulphide oxidoreductase	Pyr_redox_2
ENSOARG00000012313	176	363	327	522	534	528	16.2297	30.07	25.4796	37.5637	40.1981	48.7962	288.667	528	-0.816114	0.00222289	0.215141	401.569	RAB37	11	55658048	55661996	-	579	protein_coding	PF00071:Ras family	Ras
ENSOARG00000015034	10	41	7	93	78	74	0.7294	2.68645	0.43143	5.29357	4.64437	5.40942	19.3333	81.6667	-1.9956	0.00224729	0.215606	49.134	-	17	71176118	71188389	-	732	protein_coding	PF07654:Immunoglobulin C1-set domain|PF07686:Immunoglobulin V-set domain	C1-set
ENSOARG00000025180	1770	1868	2087	1811	891	1070	84.681	80.282	84.3688	67.6131	34.7982	51.3038	1908.33	1257.33	0.697237	0.00225231	0.215606	1572.83	CD14	5	49150405	49151522	-	1116	protein_coding	-	-
ENSOARG00000016033	0	0	0	14	2	19	0	0	0	0.502427	0.0750829	0.875693	0	11.6667	-5.96758	0.00227139	0.216251	5.89556	SOWAHC	3	62351014	62352174	+	1161	protein_coding	PF13637:Ankyrin repeats (many copies)	-
ENSOARG00000013115	53	83	81	184	173	113	2.30251	3.23915	2.97342	6.23796	6.13532	4.91991	72.3333	156.667	-1.02213	0.00232472	0.217951	110.936	-	8	49694671	49705780	-	1229	protein_coding	-	-
ENSOARG00000002066	890	622	1046	556	646	481	12.1563	7.63186	12.0723	5.92633	7.20295	6.5843	852.667	561	0.692117	0.00232657	0.217951	704.939	PRDM11	15	73389949	73482518	+	3909	protein_coding	-	-
ENSOARG00000008605	583	1263	880	1692	1345	1993	47.163	91.7835	60.1537	106.815	88.8222	161.582	908.667	1676.67	-0.842346	0.00235587	0.218539	1283.73	CD9	3	208069062	208082480	-	660	protein_coding	PF00335:Tetraspanin family	Tetraspannin
ENSOARG00000013013	267	242	232	431	590	337	6.43597	5.24019	4.72539	8.10738	11.6097	8.14116	247	452.667	-0.766691	0.0023578	0.218539	342.837	SYN1	X	53791006	53843432	+	2215	protein_coding	PF02750:Synapsin, ATP binding domain|PF10581:Synapsin N-terminal|PF02078:Synapsin, N-terminal domain	-
ENSOARG00000012584	29	25	69	8	10	10	0.307582	0.238195	0.618386	0.0662146	0.0865825	0.106296	41	9.33333	2.17741	0.00237372	0.218857	25.0571	COL18A1	1	263365064	263422969	+	5034	protein_coding	PF06121:Domain of Unknown Function (DUF959)|PF01391:Collagen triple helix repeat (20 copies)|PF06482:Collagenase NC10 and Endostatin	Collagen
ENSOARG00000020092	1087	824	1170	237	761	542	26.0373	17.7306	23.681	4.43012	14.8805	13.0113	1027	513.333	1.06176	0.00239958	0.218937	777.53	-	1	184703640	184734131	+	2229	protein_coding	PF00854:POT family	-
ENSOARG00000011345	1428	1514	1577	1454	1028	856	88.8623	84.6338	82.9216	70.608	52.2215	53.3847	1506.33	1112.67	0.539947	0.00244305	0.219006	1298.02	PDXK	1	261870313	261882013	+	858	protein_coding	PF08543:Phosphomethylpyrimidine kinase	-
ENSOARG00000016314	1119	2166	3524	4464	5643	3018	62.2351	108.216	165.611	193.745	256.202	168.22	2269.67	4375	-0.879162	0.00245135	0.219006	3204.31	-	4	105479145	105547830	+	960	protein_coding	PF07654:Immunoglobulin C1-set domain|PF07686:Immunoglobulin V-set domain	C1-set
ENSOARG00000026813	24	32	70	4	16	5	1.39435	1.67009	3.43642	0.181352	0.758836	0.291129	42	8.33333	2.39805	0.00246036	0.219006	24.8553	-	15	19931320	19950311	+	919	lincRNA	-	-
ENSOARG00000007679	197	116	152	115	44	23	5.25124	2.77768	3.42362	2.39218	0.957448	0.614437	155	60.6667	1.52171	0.0024805	0.219006	107.971	-	3	83648848	83675139	+	2003	protein_coding	PF03160:Calx-beta domain|PF01699:Sodium/calcium exchanger protein|PF16494:C-terminal extension of sodium/calcium exchanger domain	Na_Ca_ex
ENSOARG00000019535	1874	2806	2430	2254	1547	1210	34.0213	45.7613	37.2765	31.9327	22.9265	22.0151	2370	1670.33	0.605774	0.00248736	0.219006	1994.58	SLC11A1	2	219378564	219390278	+	2941	protein_coding	PF01566:Natural resistance-associated macrophage protein	-
ENSOARG00000002316	7	16	4	55	41	36	0.281859	0.578738	0.136094	1.72821	1.34767	1.45274	9	44	-2.18731	0.00251842	0.219006	25.6225	-	14	59876096	59883028	-	1326	protein_coding	PF00047:Immunoglobulin domain	ig
ENSOARG00000005792	1919	1818	2076	1953	1072	801	40.5619	34.5196	37.0781	32.2141	18.4971	16.968	1937.67	1275.33	0.727187	0.00253315	0.219006	1588.59	TLR4	2	5857967	5868004	-	2526	protein_coding	PF01582:TIR domain|PF13855:Leucine rich repeat	TIR
ENSOARG00000019911	637	1065	1083	1697	1450	1275	47.0411	70.6507	67.5793	97.7958	87.4124	94.3631	928.333	1474	-0.593146	0.00254552	0.219006	1175.32	-	7	25707944	25718742	+	723	protein_coding	-	-
ENSOARG00000009241	63	4	1	2	0	0	10.1012	0.576131	0.135481	0.250243	0	0	22.6667	0.666667	5.35524	0.00255036	0.219006	12.8648	CCL8	11	15401076	15402616	-	333	protein_coding	PF00048:Small cytokines (intecrine/chemokine), interleukin-8 like	-
ENSOARG00000011169	914	1952	1569	1148	788	846	94.5743	181.441	137.182	92.6977	66.561	87.7306	1478.33	927.333	0.742657	0.00256405	0.219108	1191.27	-	9	31967164	31967945	+	516	protein_coding	PF07716:Basic region leucine zipper	bZIP_2
ENSOARG00000000118	59	36	8	87	275	89	5.2241	2.86346	0.598544	6.01144	19.8774	7.89774	34.3333	150.333	-1.96767	0.00261231	0.221636	89.574	ARL4D	11	42763484	42764086	+	603	protein_coding	PF00025:ADP-ribosylation factor family	Arf
ENSOARG00000020858	109	152	95	37	33	67	6.46637	8.1004	4.76217	1.71292	1.59814	3.98348	118.667	45.6667	1.41488	0.00263159	0.221636	83.7614	AQP9	7	49083729	49133768	-	900	protein_coding	PF00230:Major intrinsic protein	-
ENSOARG00000003293	637	579	660	336	480	407	6.03455	4.92735	5.28319	2.48396	3.71205	3.86415	625.333	407.667	0.692101	0.0026604	0.22229	518.358	PDGFD	15	3848546	4133998	+	5636	protein_coding	PF00431:CUB domain|PF00341:PDGF/VEGF domain	CUB
ENSOARG00000018710	3383	2816	1849	2448	1432	1040	149.772	111.993	69.1693	84.5748	51.7534	46.1441	2682.67	1640	0.857082	0.0026752	0.22229	2164.81	ANXA3	6	92924512	92997934	+	1206	protein_coding	PF00191:Annexin	-
ENSOARG00000012768	515	193	208	207	124	85	8.74028	2.94242	2.98283	2.7415	1.71793	1.44574	305.333	138.667	1.30765	0.00267743	0.22229	226.217	-	13	10429562	10448119	-	3146	protein_coding	-	-
ENSOARG00000004210	4	11	17	29	115	27	0.0486267	0.120126	0.174626	0.275114	1.14124	0.328951	10.6667	57	-2.33847	0.00272274	0.224715	32.096	NOS1	17	57393202	57480359	+	4392	protein_coding	PF02898:Nitric oxide synthase, oxygenase domain|PF00595:PDZ domain (Also known as DHR or GLGF)|PF00175:Oxidoreductase NAD-binding domain|PF00258:Flavodoxin|PF00667:FAD binding domain	NAD_binding_1
ENSOARG00000013937	274	265	236	220	121	77	12.1305	10.5391	8.82853	7.60068	4.37302	3.41644	258.333	139.333	1.0278	0.00273426	0.224715	197.733	CRYL1	10	36124260	36182572	+	1206	protein_coding	PF00725:3-hydroxyacyl-CoA dehydrogenase, C-terminal domain|PF02737:3-hydroxyacyl-CoA dehydrogenase, NAD binding domain	3HCDH_N
ENSOARG00000014764	275	356	346	116	226	189	6.12805	7.12637	6.51498	2.0172	4.11116	4.2209	325.667	177	0.936292	0.00275274	0.224715	252.32	ZNF175	14	56379583	56488296	+	2396	protein_coding	PF01352:KRAB box|PF00096:Zinc finger, C2H2 type	KRAB
ENSOARG00000006415	340	341	436	256	291	200	18.6762	16.8265	20.2369	10.9736	13.0488	11.0102	372.333	249	0.669208	0.0027651	0.224715	308.532	-	22	23767097	23770727	+	972	protein_coding	PF10376:Double-strand recombination repair protein	-
ENSOARG00000000562	70	99	11	186	184	263	2.67917	3.40382	0.355748	5.5554	5.74893	10.0882	60	211	-1.73412	0.0027776	0.224715	135.714	-	7	81886695	81894503	+	1395	protein_coding	PF04775:Acyl-CoA thioester hydrolase/BAAT N-terminal region|PF08840:BAAT / Acyl-CoA thioester hydrolase C terminal	-
ENSOARG00000012648	2653	2373	2666	2144	2164	1692	48.4271	38.9114	41.1204	30.5405	32.2459	30.9531	2564	2000	0.453831	0.00279936	0.224715	2272.56	FES	18	20872885	20883660	-	2925	protein_coding	PF00017:SH2 domain|PF07714:Protein tyrosine kinase	Pkinase_Tyr
ENSOARG00000018991	54	36	42	98	171	84	2.07124	1.24042	1.36124	2.93335	5.35427	3.22902	44	117.667	-1.30625	0.00283585	0.224715	78.8133	-	15	46982687	47008547	-	1392	protein_coding	PF13445:RING-type zinc-finger	-
ENSOARG00000008579	301	234	277	461	469	483	4.98326	3.4801	3.87502	5.95591	6.3385	8.01397	270.667	471	-0.719247	0.00284659	0.224715	368.118	ZNF827	17	12150956	12298600	+	3225	protein_coding	-	-
ENSOARG00000017586	219	250	232	438	384	341	15.4667	15.8607	13.8449	24.1396	22.1387	24.1359	233.667	387.667	-0.641136	0.00284774	0.224715	305.565	CNPY4	24	36251264	36254861	-	756	protein_coding	PF11938:TLR4 regulator and MIR-interacting MSAP	-
ENSOARG00000003261	1428	335	202	169	104	77	23.1463	4.87783	2.76663	2.13767	1.37611	1.25083	655	116.667	2.68936	0.00287981	0.225966	409.194	CNTN2	12	2122087	2151161	+	3294	protein_coding	PF13927:Immunoglobulin domain|PF07679:Immunoglobulin I-set domain|PF00041:Fibronectin type III domain	fn3
ENSOARG00000009000	5320	5808	6163	5675	4261	3687	82.3321	80.7445	80.5929	68.5368	53.8314	57.1853	5763.67	4541	0.439899	0.00291896	0.225966	5105.79	ITGAM	24	27341076	27384550	+	3450	protein_coding	PF08441:Integrin alpha|PF00092:von Willebrand factor type A domain	VWA
ENSOARG00000017451	75	54	113	170	186	171	3.45804	2.23661	4.40244	6.1167	7.0008	7.90165	80.6667	175.667	-1.05587	0.00292364	0.225966	125.999	-	18	20735343	20736500	+	1158	protein_coding	-	-
ENSOARG00000008968	566	589	533	321	295	415	27.5227	25.7287	21.9002	12.1809	11.7102	20.2244	562.667	343.667	0.770647	0.0029365	0.225966	457.818	-	2	98597621	98598718	-	1098	protein_coding	PF01564:Spermine/spermidine synthase domain|PF17284:Spermidine synthase tetramerisation domain	-
ENSOARG00000014178	19	50	62	295	154	39	0.219293	0.518406	0.604658	2.65701	1.45097	0.451117	43.6667	162.667	-1.76396	0.00294099	0.225966	95.5368	ABCA10	11	60258964	60303112	+	4626	protein_coding	PF00005:ABC transporter|PF12698:ABC-2 family transporter protein	ABC_tran
ENSOARG00000015081	2317	2934	2645	2509	1557	1634	63.8335	72.6126	61.5737	53.9416	35.0169	45.1158	2632	1900	0.56213	0.00300969	0.230235	2250.49	TGFBI	5	44831112	44859061	+	1938	protein_coding	PF02469:Fasciclin domain	-
ENSOARG00000015052	38	54	63	15	25	7	2.7052	3.45333	3.78968	0.833311	1.45285	0.499421	51.6667	15.6667	1.82694	0.00309413	0.233634	33.4009	AREG	6	89053717	89061196	+	750	protein_coding	-	-
ENSOARG00000010944	2558	2787	2099	20143	7922	3380	316.15	309.427	219.206	1942.75	799.272	418.662	2481.33	10481.7	-1.90519	0.00326218	0.243178	6054.28	-	24	154448	155145	+	432	protein_coding	PF00042:Globin	-
ENSOARG00000015908	0	1	0	31	29	0	0	0.0342592	0	0.922594	0.902845	0	0.333333	20	-5.61496	0.00333848	0.245827	9.11518	ANKRD1	22	12267085	12276113	-	1400	protein_coding	PF12796:Ankyrin repeats (3 copies)	-
ENSOARG00000003029	165	316	244	440	398	500	3.90847	6.72417	4.88382	8.13347	7.69613	11.8699	241.667	446	-0.833865	0.00334829	0.245827	340.583	BAG3	22	38724103	38747128	+	2254	protein_coding	PF00397:WW domain|PF02179:BAG domain	WW
ENSOARG00000017923	30	39	16	91	102	63	3.95497	4.61865	1.78233	9.36188	10.9771	8.32369	28.3333	85.3333	-1.47439	0.00335366	0.245827	55.2646	-	4	82661756	82662301	+	405	protein_coding	PF07686:Immunoglobulin V-set domain	V-set
ENSOARG00000015970	111	334	221	509	583	319	6.68907	18.0808	11.2534	23.9365	28.6799	19.2658	222	470.333	-0.996478	0.00336315	0.245827	334.399	SLA2	13	65280864	65303946	-	886	protein_coding	PF00017:SH2 domain	SH2
ENSOARG00000008774	13	58	50	9	10	0	1.13415	4.5455	3.68589	0.612728	0.712183	0	40.3333	6.33333	2.79719	0.00336788	0.245827	22.8868	CD99L2	X	79999268	80056889	+	612	protein_coding	PF12301:CD99 antigen like protein 2	-
ENSOARG00000003703	4386	3364	4260	3350	3430	2003	131.413	90.5428	107.851	78.3274	83.8938	60.1456	4003.33	2927.67	0.567464	0.00339147	0.246522	3440.77	AOAH	4	60565422	60759733	+	1782	protein_coding	PF00657:GDSL-like Lipase/Acylhydrolase|PF03489:Saposin-like type B, region 2	Lipase_GDSL
ENSOARG00000010691	669	1354	1594	2322	1794	2162	31.0063	56.3731	62.4251	83.9821	67.8755	100.423	1205.67	2092.67	-0.750966	0.00341191	0.246983	1619.77	S1PR1	1	77748845	77749996	+	1152	protein_coding	PF00001:7 transmembrane receptor (rhodopsin family)	7tm_1
ENSOARG00000012934	421	371	298	592	679	639	15.1062	11.9585	9.03518	16.5766	19.8889	22.9788	363.333	636.667	-0.72057	0.00344094	0.248059	497.068	NSUN5	24	33746138	33751219	+	1488	protein_coding	PF01189:16S rRNA methyltransferase RsmB/F	-
ENSOARG00000020462	222	102	339	112	112	86	6.91543	2.85427	8.92303	2.7226	2.84807	2.68484	221	103.333	1.1788	0.00348615	0.250289	161.521	IL1RAP	1	194883760	194971984	-	1714	protein_coding	PF01582:TIR domain|PF13927:Immunoglobulin domain	TIR
ENSOARG00000017527	120	183	142	266	300	243	4.46484	6.11652	4.46437	7.72337	9.11198	9.06118	148.333	269.667	-0.782852	0.00365348	0.261231	205.449	-	9	43514982	43545070	+	1435	protein_coding	PF00465:Iron-containing alcohol dehydrogenase	-
ENSOARG00000000888	1309	1035	882	861	796	556	36.5726	25.9768	20.8224	18.7724	18.155	15.5684	1075.33	737.667	0.665371	0.00367628	0.261793	907.802	XAF1	11	24759325	24772292	-	1911	protein_coding	-	-
ENSOARG00000010374	138	238	196	498	246	391	1.71431	2.65593	2.05737	4.82769	2.49466	4.86789	190.667	378.333	-0.922089	0.00372765	0.262639	279.799	PER3	12	43655052	43723214	-	4298	protein_coding	PF08447:PAS fold|PF12114:Period protein 2/3C-terminal region	-
ENSOARG00000010591	3	8	19	0	0	0	0.337924	0.8095	1.80842	0	0	0	10	0	5.7909	0.00372957	0.262639	4.90181	-	8	28045985	28056348	-	474	protein_coding	PF15082:Domain of unknown function (DUF4549)	-
ENSOARG00000020262	1082	1419	1442	1099	819	933	148.129	174.511	166.811	117.411	91.5298	128.011	1314.33	950.333	0.539224	0.00373313	0.262639	1126.96	H2AFJ	3	199977235	199977624	-	390	protein_coding	PF16211:C-terminus of histone H2A|PF00125:Core histone H2A/H2B/H3/H4	Histone
ENSOARG00000007476	1368	1849	1592	2230	2532	2667	49.385	59.9617	48.5622	62.8223	74.6172	96.4906	1603	2476.33	-0.566584	0.0037788	0.264788	2026.28	SIGIRR	21	49579896	49652258	+	1479	protein_coding	PF13927:Immunoglobulin domain	-
ENSOARG00000000267	542	516	524	760	1030	746	54.3957	46.5204	44.4368	59.5222	84.3857	75.0339	527.333	845.333	-0.591762	0.00385876	0.269314	677.686	-	AMGL01130197.1	3901	4874	-	532	protein_coding	PF00651:BTB/POZ domain	BTB
ENSOARG00000012274	76	101	106	184	170	194	4.43475	5.29427	5.22647	8.37864	8.09788	11.3452	94.3333	182.667	-0.892447	0.00406538	0.278409	136.859	TBXA2R	5	17893368	17899126	+	915	protein_coding	PF00001:7 transmembrane receptor (rhodopsin family)	7tm_1
ENSOARG00000002414	111	22	134	39	17	1	20.366	3.62606	20.7747	5.58404	2.54624	0.183881	89	19	2.41449	0.00406854	0.278409	54.0157	-	JH923327.1	1256	2218	-	291	protein_coding	-	-
ENSOARG00000010838	3060	4293	4719	5782	6781	5040	72.4201	91.2698	94.3701	106.786	131.008	119.542	4024	5867.67	-0.469642	0.00418658	0.283793	4855.13	DGKA	3	163286147	163302420	-	2256	protein_coding	PF14513:Diacylglycerol kinase N-terminus|PF00781:Diacylglycerol kinase catalytic domain|PF00130:Phorbol esters/diacylglycerol binding domain (C1 domain)|PF00609:Diacylglycerol kinase accessory domain	C1_1
ENSOARG00000017592	663	770	820	1544	1260	792	12.7289	13.2799	13.3026	23.1325	19.7475	15.2389	751	1198.67	-0.565469	0.00421095	0.283793	947.649	MTBP	9	94275767	94343431	+	2781	protein_coding	PF14919:MDM2-binding|PF14920:MDM2-binding|PF14918:MDM2-binding	-
ENSOARG00000007169	435	320	381	318	227	188	15.9626	10.5485	11.8137	9.10628	6.79996	6.91393	378.667	244.333	0.745241	0.00421201	0.283793	311.071	KLF4	2	15622345	15625917	+	1455	protein_coding	PF00096:Zinc finger, C2H2 type	zf-C2H2
ENSOARG00000007991	195	534	637	289	119	227	12.7124	31.2725	35.0896	14.7025	6.33295	14.8311	455.333	211.667	1.1426	0.00428462	0.287013	329.227	C1QC	2	243066612	243070884	-	819	protein_coding	PF00386:C1q domain|PF01391:Collagen triple helix repeat (20 copies)	Collagen
ENSOARG00000001229	527	525	585	698	993	1112	10.8723	9.72972	10.198	11.2375	16.7235	22.9917	545.667	934.333	-0.725281	0.00429864	0.287013	739.689	-	24	2502240	2511477	+	2588	protein_coding	PF15225:Interleukin 32	-
ENSOARG00000012558	14	10	9	0	1	0	0.657422	0.421837	0.357113	0	0.0383339	0	11	0.333333	5.04395	0.00432535	0.287013	5.86105	MGAT4D	17	16897470	16943280	+	1137	protein_coding	PF04666:N-Acetylglucosaminyltransferase-IV (GnT-IV) conserved region	-
ENSOARG00000013109	752	741	700	671	417	434	20.7713	18.3862	16.3377	14.4633	9.40259	12.014	731	507.333	0.628018	0.00435315	0.287768	617.583	ANKH	16	58189981	58357213	+	1933	protein_coding	PF07260:Progressive ankylosis protein (ANKH)	-
ENSOARG00000019721	0	8	9	298	13	71	0	0.138471	0.146531	4.48081	0.20448	1.37105	5.66667	127.333	-4.40274	0.00441019	0.290443	61.4779	-	7	23458785	23461851	+	2771	protein_coding	PF00074:Pancreatic ribonuclease	-
ENSOARG00000006617	203	179	270	182	106	73	11.5059	9.11397	12.9311	8.05003	4.90454	4.1467	217.333	120.333	0.968034	0.00444614	0.291713	166.864	-	20	5559593	5560910	+	942	protein_coding	-	-
ENSOARG00000020233	564	906	995	1498	1210	1150	5.0704	7.31678	7.55846	10.5093	8.88005	10.3613	821.667	1286	-0.576181	0.0044634	0.291753	1032.16	HEG1	1	187691865	187930951	-	5939	protein_coding	PF00324:Amino acid permease	AA_permease
ENSOARG00000005482	87	246	284	345	428	535	3.63467	9.23229	10.0256	11.2477	14.5968	22.4003	205.667	436	-1.07198	0.00453999	0.294432	317.875	-	24	26441775	26443607	-	1278	protein_coding	PF04505:Interferon-induced transmembrane protein	-
ENSOARG00000002866	1179	1118	951	887	807	697	65.9845	56.2081	44.9734	38.7393	36.8696	39.0944	1082.67	797	0.542323	0.00459662	0.294432	940.188	RASSF4	25	44101352	44124264	-	954	protein_coding	PF00788:Ras association (RalGDS/AF-6) domain|PF16517:Novel Ras effector 1 C-terminal SARAH (Sav/Rassf/Hpo) domain	RA
ENSOARG00000026496	356	331	295	267	226	136	3.02765	2.52879	2.11994	1.77201	1.56903	1.15917	327.333	209.667	0.766165	0.00460883	0.294432	267.303	-	9	13780055	14065063	-	6278	lincRNA	-	-
ENSOARG00000016654	25	36	36	83	89	69	4.27821	5.53418	5.20561	11.0841	12.4331	11.8338	32.3333	80.3333	-1.23332	0.00462633	0.294432	54.9578	LYRM7	5	20787345	20808989	-	312	protein_coding	PF05347:Complex 1 protein (LYR family)	-
ENSOARG00000003252	5623	6659	6174	6119	4408	3945	57.2727	60.9281	53.1365	48.6363	36.6512	40.2699	6152	4824	0.44788	0.00463259	0.294432	5442.12	HK3	5	35819608	35841049	-	5242	protein_coding	PF03727:Hexokinase|PF00349:Hexokinase	-
ENSOARG00000020179	5407	5792	5283	5253	4315	3637	170.823	164.379	141.032	129.508	111.285	115.156	5494	4401.67	0.419273	0.00464738	0.294432	4917.68	PPT1	1	14443863	14459445	-	1690	protein_coding	PF02089:Palmitoyl protein thioesterase	-
ENSOARG00000007932	1857	2475	2310	2310	1196	896	223.309	267.361	234.721	216.773	117.406	107.983	2214	1467.33	0.712857	0.00467075	0.294432	1812.92	AIF1	20	26823544	26825580	-	444	protein_coding	-	-
ENSOARG00000003830	439	353	410	356	242	125	7.94816	5.74124	6.27238	5.02982	3.57671	2.26812	400.667	241	0.871828	0.00467548	0.294432	317.999	-	5	1862751	1966978	+	2949	protein_coding	PF05986:ADAM-TS Spacer 1|PF01421:Reprolysin (M12B) family zinc metalloprotease|PF00090:Thrombospondin type 1 domain	TSP_1
ENSOARG00000019375	1230	1447	1695	1944	2471	2061	22.3832	23.6545	26.0635	27.6066	36.7076	37.5879	1457.33	2158.67	-0.498747	0.0047509	0.297237	1785.2	HDAC7	3	138572392	138591946	+	2934	protein_coding	PF00850:Histone deacetylase domain	Hist_deacetyl
ENSOARG00000020195	21	20	30	66	54	82	0.4569	0.390896	0.551531	1.12059	0.959097	1.78801	23.6667	67.3333	-1.46178	0.00484208	0.300793	45.1879	-	2	220384019	220390464	+	2454	protein_coding	PF00069:Protein kinase domain	Pkinase
ENSOARG00000008834	7	8	6	29	31	35	0.194052	0.199223	0.140546	0.627363	0.701534	0.972394	7	31.6667	-2.10872	0.00489927	0.302745	19.091	HSPA1L	20	26664350	26666275	+	1926	protein_coding	PF00012:Hsp70 protein	HSP70
ENSOARG00000011737	3967	3833	2963	2587	2688	2545	66.3346	57.5765	41.8655	33.7578	36.6922	42.65	3587.67	2606.67	0.551199	0.00491016	0.302745	3113.16	RFC2	24	33080585	33093011	+	3193	protein_coding	PF08542:Replication factor C C-terminal domain|PF00004:ATPase family associated with various cellular activities (AAA)	AAA
ENSOARG00000000628	53	82	74	92	336	128	1.50201	2.08756	1.77204	2.03462	7.77323	3.63546	69.6667	185.333	-1.32628	0.00492535	0.302745	123.915	-	14	58512819	58519167	+	1884	protein_coding	PF13906:C-terminus of AA_permease|PF13520:Amino acid permease	-
ENSOARG00000002356	1159	448	1552	2915	2584	5180	66.3252	23.0304	75.047	130.177	120.713	297.083	1053	3559.67	-1.7362	0.00497584	0.30381	2323.16	RARRES1	1	226893623	226934593	+	933	protein_coding	PF06907:Latexin	-
ENSOARG00000020522	174	268	143	538	297	332	2.68116	3.70968	1.8619	6.46928	3.73591	5.12702	195	389	-0.894896	0.00497737	0.30381	285.771	TIE1	1	17757463	17776556	+	3465	protein_coding	PF00047:Immunoglobulin domain|PF00041:Fibronectin type III domain|PF07714:Protein tyrosine kinase	Pkinase_Tyr
ENSOARG00000006648	123	142	77	147	335	312	0.834463	0.865404	0.441407	0.778251	1.8553	2.12134	114	264.667	-1.15112	0.00500621	0.30451	189.732	SLFN14	11	14377648	14393003	+	7870	protein_coding	PF04326:Putative DNA-binding domain	AAA_4
ENSOARG00000008436	63	84	84	152	126	224	2.74812	3.29157	3.09615	5.17415	4.48676	9.79257	77	167.333	-1.0862	0.00504267	0.304745	122.329	TCEA2	13	53127594	53132128	-	1224	protein_coding	PF01096:Transcription factor S-II (TFIIS)|PF08711:TFIIS helical bundle-like domain|PF07500:Transcription factor S-II (TFIIS), central domain	-
ENSOARG00000004520	2	4	0	27	18	17	0.144108	0.258909	0	1.51818	1.05876	1.22761	2	20.6667	-3.25378	0.00508071	0.305855	10.9037	-	18	33618293	33621973	+	741	protein_coding	PF00089:Trypsin	Trypsin
ENSOARG00000017108	576	964	881	1321	1557	968	27.3611	41.1354	35.3617	48.9681	60.3762	46.0829	807	1282	-0.581827	0.00517225	0.30924	1019.26	GRAP2	3	215254318	215323045	+	1124	protein_coding	PF00018:SH3 domain|PF00017:SH2 domain	SH2
ENSOARG00000020048	154	150	174	40	38	108	27.1366	23.744	25.9078	5.5004	5.46618	19.0727	159.333	62	1.36362	0.00521545	0.310001	113.149	-	20	30513922	30514224	+	303	protein_coding	PF00957:Synaptobrevin	-
ENSOARG00000020820	262	442	324	536	909	448	8.57152	12.99	8.95671	13.6843	24.2766	14.6889	342.667	631	-0.787445	0.00522037	0.310001	474.701	ECM1	1	99441346	99446281	+	1632	protein_coding	PF05782:Extracellular matrix protein 1 (ECM1)	-
ENSOARG00000012780	303	598	698	1007	835	889	7.45864	13.2235	14.5184	19.344	16.7792	21.9317	533	910.333	-0.720298	0.00528499	0.31068	707.347	SLC37A3	4	103511881	103552768	-	2169	protein_coding	PF07690:Major Facilitator Superfamily	MFS_1
ENSOARG00000013931	1786	2599	2411	3245	3431	3169	45.7354	59.7868	52.1693	64.8463	71.7229	81.3292	2265.33	3281.67	-0.46632	0.0054823	0.31801	2738.33	-	3	213470349	213482755	+	2085	protein_coding	PF03114:BAR domain|PF00620:RhoGAP domain	RhoGAP
ENSOARG00000011841	160	54	36	29	33	21	2.61405	0.792533	0.496986	0.369737	0.440124	0.343849	83.3333	27.6667	1.7527	0.0055235	0.319342	57.7568	ANPEP	18	20303375	20320351	-	3268	protein_coding	PF01433:Peptidase family M1 domain|PF11838:ERAP1-like C-terminal domain	-
ENSOARG00000006329	1174	1359	1710	2291	1986	1794	33.502	34.8378	41.2331	51.0186	46.2646	51.3073	1414.33	2023.67	-0.439281	0.0056014	0.322179	1689.13	RP9	4	63715712	63728044	+	1871	protein_coding	-	-
ENSOARG00000000450	2004	2175	2140	1665	1914	1447	363.938	354.828	328.39	235.963	283.751	263.361	2106.33	1675.33	0.418785	0.00563684	0.3227	1881.52	S100A8	1	102332237	102332680	-	294	protein_coding	-	-
ENSOARG00000010555	54	92	36	27	25	6	2.42691	3.7143	1.36713	0.946944	0.917206	0.27025	60.6667	19.3333	1.801	0.00568574	0.324439	40.0564	STMN3	13	53404729	53413032	+	1188	protein_coding	PF00836:Stathmin family	-
ENSOARG00000021044	83	138	123	211	247	181	8.25241	12.3257	10.3337	16.3714	20.0478	18.0358	114.667	213	-0.815652	0.00576003	0.326362	160.315	-	3	204722589	204738493	+	537	protein_coding	PF00059:Lectin C-type domain	Lectin_C
ENSOARG00000000338	622	1102	1005	1653	1147	1803	6.12051	9.74108	8.35622	12.6932	9.21355	17.7806	909.667	1534.33	-0.711491	0.00577533	0.326362	1212.36	ABCA2	JH921894.1	40046	55878	+	5426	protein_coding	PF12698:ABC-2 family transporter protein|PF00005:ABC transporter	ABC_tran
ENSOARG00000002761	243	203	221	173	131	116	16.2585	12.2011	12.4943	9.03275	7.15503	7.77831	222.333	140	0.77067	0.00580819	0.32665	181.139	SCAMP5	18	32606249	32612056	-	798	protein_coding	PF04144:SCAMP family	-
ENSOARG00000013802	2660	4007	3536	5365	5211	4060	171.112	231.551	192.202	269.32	273.644	261.745	3401	4878.67	-0.43619	0.00581771	0.32665	4062.35	SKP1	5	43178830	43186709	-	830	protein_coding	PF03931:Skp1 family, tetramerisation domain|PF01466:Skp1 family, dimerisation domain	Skp1
ENSOARG00000001158	720	1899	1590	2125	2623	2646	49.4753	117.222	92.3208	113.95	147.137	182.221	1403	2464.67	-0.774432	0.00584281	0.326821	1908.19	LAT	24	25866851	25870792	-	777	protein_coding	PF15234:Linker for activation of T-cells	-
ENSOARG00000002143	1971	3529	3369	5918	4295	3669	35.5887	57.2408	51.4012	83.3874	63.3075	66.3937	2956.33	4627.33	-0.563256	0.00587341	0.326821	3695.25	-	JH923881.1	9570	15149	+	2957	protein_coding	PF04548:AIG1 family	-
ENSOARG00000000803	2362	1545	1867	1470	1462	1214	28.9314	16.9999	19.3233	14.051	14.6185	14.9026	1924.67	1382	0.581746	0.00587883	0.326821	1658.54	MTCL1	23	41476618	41586342	+	4359	protein_coding	PF14818:Domain of unknown function (DUF4482)|PF11365:Protein SOGA	-
ENSOARG00000014514	218	342	282	214	201	116	0.735884	1.03707	0.804356	0.563724	0.553879	0.392432	280.667	177	0.768481	0.00590796	0.326821	226.088	DNAH7	2	197002405	197290777	-	15817	protein_coding	PF12781:ATP-binding dynein motor region D5|PF12777:Microtubule-binding stalk of dynein motor|PF03028:Dynein heavy chain and region D6 of dynein motor|PF08393:Dynein heavy chain, N-terminal region 2|PF12774:Hydrolytic ATP binding site of dynein motor region D1|PF12780:P-loop containing dynein motor region D4|PF12775:P-loop containing dynein motor region D3	Dynein_heavy
ENSOARG00000020247	165	359	530	180	236	143	1.24907	2.44133	3.3902	1.06335	1.45842	1.08491	351.333	186.333	0.973986	0.00594081	0.326821	263.65	KNL1	7	33203356	33258031	+	7053	protein_coding	-	-
ENSOARG00000001516	26	7	14	67	166	13	0.997266	0.241193	0.453745	2.00545	5.19771	0.499729	15.6667	82	-2.19695	0.00594465	0.326821	45.7638	SERINC2	2	235085858	235104700	-	1392	protein_coding	PF03348:Serine incorporator (Serinc)	TMS_TDE
ENSOARG00000015314	450	759	572	968	915	957	6.61521	10.0231	7.10516	11.1047	10.9804	14.0993	593.667	946.667	-0.607074	0.00597582	0.327139	761.07	AMZ2	11	60777867	60787427	-	3632	protein_coding	PF07998:Peptidase family M54	-
ENSOARG00000009185	61	161	84	238	110	469	0.705113	1.6718	0.820455	2.14687	1.03798	5.43319	102	272.333	-1.42707	0.00604636	0.329969	190.726	ARHGAP23	11	38656431	38702384	+	4619	protein_coding	PF15410:Pleckstrin homology domain|PF00620:RhoGAP domain	RhoGAP
ENSOARG00000000006	115	219	802	129	106	181	6.42941	10.9988	37.8874	5.62812	4.83778	10.1416	378.667	138.667	1.42864	0.00612056	0.331951	253.627	ND1	MT	2745	3699	+	955	protein_coding	-	-
ENSOARG00000015497	33	46	14	10	8	2	0.998265	1.25002	0.357855	0.236065	0.197555	0.0606339	31	6.66667	2.37678	0.00624728	0.334017	19.131	CDKL2	6	90096566	90133537	-	1765	protein_coding	PF00069:Protein kinase domain	Pkinase
ENSOARG00000001198	15122	18146	22826	17693	12203	12796	1843.37	1987.07	2351.14	1683.08	1214.33	1563.26	18698	14230.7	0.470569	0.00627996	0.334017	16300.2	-	11	27540713	27544548	-	438	protein_coding	PF00467:KOW motif|PF16906:Ribosomal proteins L26 eukaryotic, L24P archaeal	KOW
ENSOARG00000002540	0	0	0	3	5	19	0	0	0	0.0451088	0.078646	0.3669	0	9	-5.65243	0.00629249	0.334017	4.74864	PGC	20	15636993	15649730	-	2771	protein_coding	PF00026:Eukaryotic aspartyl protease|PF07966:A1 Propeptide	Asp
ENSOARG00000014116	210	384	575	313	202	128	6.29199	10.3354	14.5574	7.31836	4.94068	3.84355	389.667	214.333	0.952207	0.00632647	0.334017	294.752	PTGS1	3	13385238	13402913	-	1782	protein_coding	PF03098:Animal haem peroxidase	An_peroxidase
ENSOARG00000019370	230	333	318	471	606	374	10.6046	13.7924	12.3892	16.9469	22.8091	17.282	293.667	483.667	-0.632938	0.0063272	0.334017	379.971	FAM118A	3	219747028	219762396	+	1158	protein_coding	PF13289:SIR2-like domain	-
ENSOARG00000008164	4710	4290	4457	4373	3298	2921	141.757	115.987	113.348	102.708	81.029	88.1066	4485.67	3530.67	0.448195	0.00633026	0.334017	3988.11	GRN	11	43571997	43575867	+	1774	protein_coding	PF00396:Granulin	-
ENSOARG00000016748	197	41	16	28	6	23	13.537	2.53086	0.929014	1.50146	0.336569	1.58393	84.6667	19	2.31207	0.00641722	0.337588	55.4227	-	11	49709056	49711469	+	777	protein_coding	-	-
ENSOARG00000014768	372	812	535	1187	1726	550	42.1695	82.6876	51.2456	105.004	159.721	62.4845	573	1154.33	-0.894956	0.0064722	0.339041	829.271	NKG7	14	56380293	56384594	-	471	protein_coding	PF00822:PMP-22/EMP/MP20/Claudin family	-
ENSOARG00000008153	20	23	10	36	71	73	1.23593	1.27679	0.522167	1.73606	3.58169	4.52105	17.6667	60	-1.69876	0.00649101	0.339041	38.8829	FAM84B	9	26753812	26754781	+	864	protein_coding	PF04970:Lecithin retinol acyltransferase	-
ENSOARG00000017076	191	375	333	467	681	434	13.0742	23.0591	19.2607	24.9459	38.0536	29.7732	299.667	527.333	-0.743159	0.00652157	0.339041	404.179	-	24	36075254	36076404	-	780	protein_coding	-	-
ENSOARG00000003036	45	44	29	82	244	51	0.683346	0.600218	0.372111	0.971722	3.02471	0.776161	39.3333	125.667	-1.53281	0.00653119	0.339041	79.0668	-	15	49718454	49748304	-	3516	protein_coding	PF08344:Transient receptor ion channel II|PF01834:XRCC1 N terminal domain|PF00520:Ion transport protein	Ion_trans
ENSOARG00000016098	351	319	193	264	59	65	25.6019	20.9019	11.8951	15.0269	3.51305	4.75152	287.667	129.333	1.32137	0.00658659	0.339364	209.07	-	20	25594470	25608591	+	732	protein_coding	PF07654:Immunoglobulin C1-set domain|PF00969:Class II histocompatibility antigen, beta domain	C1-set
ENSOARG00000000345	101	191	129	337	456	141	0.906624	1.54017	0.978458	2.36067	3.34147	1.26846	140.333	311.333	-1.02716	0.00664316	0.341275	216.31	GRAMD1B	15	33605559	33794217	+	5948	protein_coding	PF02893:GRAM domain|PF16016:Domain of unknown function (DUF4782)	GRAM
ENSOARG00000002762	192	219	220	112	132	138	7.83737	8.03048	7.58819	3.56769	4.39855	5.64549	210.333	127.333	0.78858	0.00669057	0.342439	169.519	TUBG2	11	42211421	42215648	+	1308	protein_coding	PF00091:Tubulin/FtsZ family, GTPase domain|PF03953:Tubulin C-terminal domain	Tubulin
ENSOARG00000016727	71	140	217	81	61	60	1.54287	2.73293	3.98454	1.37359	1.0821	1.3067	142.667	67.3333	1.13708	0.00671065	0.342439	103.317	HGF	4	38938624	39022690	+	2457	protein_coding	PF00051:Kringle domain|PF00089:Trypsin|PF00024:PAN domain	Trypsin
ENSOARG00000020808	746	689	1048	811	460	392	7.24981	6.015	8.6059	6.15048	3.64932	3.81793	827.667	554.333	0.682152	0.00672446	0.342439	681.846	EMP1	3	201508686	201517182	-	5494	protein_coding	PF00822:PMP-22/EMP/MP20/Claudin family	-
ENSOARG00000018347	3621	3095	2924	2534	2770	2104	402.776	309.261	274.827	219.959	251.525	234.55	3213.33	2469.33	0.482244	0.0069788	0.353337	2841.15	LY86	20	47482044	47522944	-	480	protein_coding	PF02221:ML domain	-
ENSOARG00000005351	92	101	178	259	176	318	3.48869	3.44052	5.70349	7.66433	5.4482	12.0852	123.667	251	-0.992102	0.00700762	0.353774	186.225	PELI3	21	43811532	43819660	+	1408	protein_coding	PF04710:Pellino	-
ENSOARG00000004472	21	74	32	13	10	12	1.51314	4.78982	1.9483	0.730974	0.5882	0.866549	42.3333	11.6667	1.92166	0.00710914	0.357868	27.0432	CASP14	5	7890876	7895099	-	741	protein_coding	PF00656:Caspase domain	Peptidase_C14
ENSOARG00000025182	261	252	194	212	110	69	29.5867	25.6617	18.5825	18.7539	10.1792	7.83896	235.667	130.333	0.999898	0.00715943	0.359366	182.157	BST-2A	5	5486295	5488372	+	471	protein_coding	PF16716:Bone marrow stromal antigen 2	-
ENSOARG00000015723	71	169	189	358	209	306	1.23762	2.64634	2.7838	4.86982	2.97401	5.3457	143	291	-0.980814	0.00722981	0.359695	212.689	PLCL1	2	199173723	199367922	+	3063	protein_coding	PF16457:Pleckstrin homology domain|PF00387:Phosphatidylinositol-specific phospholipase C, Y domain|PF00388:Phosphatidylinositol-specific phospholipase C, X domain|PF00168:C2 domain|PF09279:Phosphoinositide-specific phospholipase C, efhand-like	PI-PLC-X
ENSOARG00000005465	601	646	552	999	1067	699	10.6148	10.2494	8.23805	13.7691	15.384	12.3728	599.667	921.667	-0.514616	0.00724375	0.359695	746.645	CRELD1	19	16720781	16729897	-	3023	protein_coding	PF07645:Calcium-binding EGF domain|PF11938:TLR4 regulator and MIR-interacting MSAP	EGF_CA
ENSOARG00000017485	13	247	154	36	48	33	0.243116	4.1495	2.43354	0.52538	0.732788	0.618498	138	39	1.86441	0.00725834	0.359695	86.911	NRP1	13	18654135	18797389	+	2855	protein_coding	PF11980:C-terminal domain of neuropilin glycoprotein|PF00431:CUB domain|PF00629:MAM domain, meprin/A5/mu|PF00754:F5/8 type C domain	CUB
ENSOARG00000009013	51	158	143	270	222	243	2.39489	6.66503	5.67413	9.89419	8.51012	11.4361	117.333	245	-1.01463	0.00726864	0.359695	177.233	LAX1	12	5606962	5614060	+	1137	protein_coding	PF15681:Lymphocyte activation family X	-
ENSOARG00000016591	530	439	566	927	820	618	40.4833	30.1226	36.5311	55.256	51.1305	47.3088	511.667	788.333	-0.522127	0.00738611	0.363455	637.583	TLDC2	13	65486045	65494325	+	699	protein_coding	PF07534:TLD	-
ENSOARG00000020290	54	66	87	149	117	155	1.65414	1.81615	2.25188	3.56177	2.92571	4.75844	69	140.333	-0.970596	0.00744654	0.363458	103.41	TRIM45	1	93665420	93673938	-	1743	protein_coding	PF00630:Filamin/ABP280 repeat|PF00643:B-box zinc finger|PF13445:RING-type zinc-finger	zf-B_box
ENSOARG00000002637	161	130	96	103	39	39	1.91152	1.38652	0.963101	0.954314	0.377994	0.464058	129	60.3333	1.23984	0.00744842	0.363458	95.2381	-	5	14258040	14264659	-	4497	protein_coding	PF00059:Lectin C-type domain	Lectin_C
ENSOARG00000023342	0	0	0	6	6	13	0	0	0	3.42456	3.58238	9.52908	0	8.33333	-5.48388	0.00746746	NA	4.21844	-	26	32108331	32108403	-	73	miRNA	-	-
ENSOARG00000015106	101	221	138	99	70	72	4.16096	8.17886	4.80394	3.18278	2.35416	2.97275	153.333	80.3333	1.01118	0.00763539	0.37084	116.258	-	11	60653024	60676821	+	1296	protein_coding	-	-
ENSOARG00000000240	0	2	1	9	6	30	0	0.351377	0.165257	1.37359	0.957926	5.88016	1	15	-3.95697	0.00764205	0.37084	8.32402	-	JH922892.1	1868	3644	-	273	protein_coding	-	-
ENSOARG00000010175	484	150	470	110	124	243	31.4377	8.75235	25.7958	5.57568	6.57496	15.8185	368	159	1.24146	0.00770044	0.372642	269.96	-	X	127319876	127320697	+	822	protein_coding	PF00766:Electron transfer flavoprotein FAD-binding domain|PF01012:Electron transfer flavoprotein domain	-
ENSOARG00000019464	0	0	0	2	7	17	0	0	0	0.0485612	0.177797	0.530105	0	8.66667	-5.58644	0.00779761	NA	4.53446	RUFY4	2	219139915	219158970	+	1716	protein_coding	PF02759:RUN domain	RUN
ENSOARG00000010256	24	28	28	7	4	8	1.46951	1.54009	1.44866	0.334471	0.199934	0.490912	26.6667	6.33333	2.13363	0.00787169	0.378836	16.7178	DYDC1	25	35349401	35372930	-	872	protein_coding	PF05186:Dpy-30 motif	Dpy-30
ENSOARG00000004944	4	13	4	27	39	32	0.170991	0.499213	0.144484	0.900696	1.36096	1.37094	7	32.6667	-2.15389	0.00793077	0.37976	19.4233	-	8	88575735	88594372	+	1249	protein_coding	PF07202:T-complex protein 10 C-terminus	-
ENSOARG00000008703	410	871	437	1076	1924	581	21.8689	41.7339	19.6957	44.7873	83.775	31.0579	572.667	1193.67	-0.939631	0.00794758	0.37976	850.582	GZMM	5	40576104	40583247	+	1001	protein_coding	PF00089:Trypsin	Trypsin
ENSOARG00000002157	106	139	127	305	422	109	4.02529	4.74171	4.07513	9.0384	13.0819	4.14831	124	278.667	-1.03539	0.00805353	0.380559	192.373	NCR1	14	59754651	59759266	-	1406	protein_coding	PF13895:Immunoglobulin domain	-
ENSOARG00000012060	1	3	0	23	12	14	0.04168	0.112325	0	0.748093	0.408296	0.584802	1.33333	16.3333	-3.50909	0.00810036	0.380559	8.49028	AMDHD1	3	165288137	165302070	+	1281	protein_coding	PF01979:Amidohydrolase family	Amidohydro_1
ENSOARG00000007427	4181	2978	2835	2770	2488	2072	301.258	192.758	172.607	155.754	146.344	149.624	3331.33	2443.33	0.560386	0.00810418	0.380559	2897.29	-	10	13383355	13469069	-	741	protein_coding	-	-
ENSOARG00000022887	25	43	15	87	67	80	4.85382	7.49965	2.46083	13.1815	10.619	15.5664	27.6667	78	-1.41132	0.00811886	0.380559	52.0958	RF00231	18	59088906	59089180	-	275	snoRNA	-	-
ENSOARG00000005436	9925	10712	9978	14589	14832	12243	142.796	138.447	121.304	163.799	174.202	176.534	10205	13888	-0.35459	0.00812473	0.380559	11900.4	RIPOR2	20	31727938	31943621	+	3711	protein_coding	PF15903:Filopodia upregulated, FAM65	-
ENSOARG00000010442	707	767	654	531	476	526	19.6913	19.1902	15.3914	11.5412	10.8225	14.6823	709.333	511	0.551507	0.00821338	0.382616	612.049	ALDH4A1	2	246601952	246620781	+	1917	protein_coding	PF00171:Aldehyde dehydrogenase family	Aldedh
ENSOARG00000008354	0	0	0	3	1	24	0	0	0	0.054799	0.0191081	0.56301	0	9.33333	-5.74707	0.00823418	0.382616	5.07197	-	18	68195138	68206717	-	2281	protein_coding	PF00008:EGF-like domain|PF01414:Delta serrate ligand	EGF
ENSOARG00000018554	155	213	285	165	111	116	41.173	50.8264	63.9694	34.203	24.0697	30.8811	217.667	130.667	0.808114	0.00826947	0.382919	172.301	-	JH924393.1	56	256	+	201	protein_coding	-	-
ENSOARG00000007663	0	0	0	4	4	17	0	0	0	0.134513	0.140712	0.734189	0	8.33333	-5.53218	0.00834507	NA	4.36845	PKDCC	3	81933712	81943209	-	1239	protein_coding	PF12260:Protein-kinase domain of FAM69	-
ENSOARG00000014678	514	566	465	423	415	292	18.4185	18.2195	14.0796	11.8285	12.1396	10.4864	515	376.667	0.555728	0.00837169	0.385935	443.749	C9orf72	2	95183641	95202857	-	1490	protein_coding	PF15019:C9orf72-like protein family	-
ENSOARG00000003022	475	745	761	1515	813	943	87.152	122.792	117.982	216.918	121.77	173.4	660.333	1090.33	-0.642856	0.00849345	0.386077	854.85	ATP5IF1	2	238013417	238015214	-	291	protein_coding	-	-
ENSOARG00000013843	6	5	3	22	47	13	0.236772	0.177246	0.100034	0.677488	1.51406	0.514133	4.66667	27.3333	-2.41001	0.00850891	0.386077	15.2397	-	12	37600675	37708416	+	1353	protein_coding	PF01031:Dynamin central region|PF00350:Dynamin family	-
ENSOARG00000002230	301	360	410	480	586	705	10.8882	11.6983	12.532	13.5498	17.3043	25.5584	357	590.333	-0.681754	0.00853655	0.386077	472.337	-	JH922363.1	12372	25724	-	1476	protein_coding	PF01619:Proline dehydrogenase	-
ENSOARG00000012494	130	115	74	238	204	192	2.01597	1.60201	0.969657	2.88016	2.58248	2.98397	106.333	211.333	-0.884017	0.00854197	0.386077	156.911	LNX2	10	32591673	32635411	+	3443	protein_coding	PF00097:Zinc finger, C3HC4 type (RING finger)|PF00595:PDZ domain (Also known as DHR or GLGF)	PDZ
ENSOARG00000011944	1347	1963	1854	2771	2298	2349	108.968	142.653	126.733	174.932	151.757	190.445	1721.33	2472.67	-0.450545	0.00854329	0.386077	2066.69	SIT1	2	52572730	52573775	+	660	protein_coding	-	-
ENSOARG00000007549	104	149	66	265	157	271	1.13484	1.46055	0.608544	2.25656	1.39852	2.96363	106.333	231	-1.04677	0.00857359	0.386077	168.023	LPAR2	5	3465897	3472240	+	4893	protein_coding	PF00001:7 transmembrane receptor (rhodopsin family)	7tm_1
ENSOARG00000016003	1089	1488	1069	1197	808	602	39.5537	48.5502	32.8083	33.9276	23.9573	21.9134	1215.33	869	0.597925	0.00857925	0.386077	1031.74	ACOD1	10	52549531	52556466	+	1470	protein_coding	PF03972:MmgE/PrpD family	-
ENSOARG00000002845	1256	1194	984	1006	928	634	14.1687	12.0997	9.37955	8.85602	8.54584	7.16775	1144.67	856	0.535049	0.0085942	0.386077	996.56	PSTPIP2	23	45957490	46061706	-	4733	protein_coding	PF00611:Fes/CIP4, and EFC/F-BAR homology domain	-
ENSOARG00000009600	1779	1714	1850	1588	1465	1283	54.5261	47.192	47.9123	37.9821	36.655	39.4102	1781	1445.33	0.391274	0.00862507	0.386077	1606.08	GALK1	11	54840907	54847564	+	1742	protein_coding	PF08544:GHMP kinases C terminal|PF00288:GHMP kinases N terminal domain	GHMP_kinases
ENSOARG00000012218	26	5	0	0	0	0	2.19304	0.378854	0	0	0	0	10.3333	0	5.9982	0.00867695	0.386776	5.68542	-	1	262709378	262710074	+	633	protein_coding	-	-
ENSOARG00000014151	612	284	196	271	188	106	13.4802	5.61942	3.64793	4.65815	3.3804	2.33993	364	188.333	1.12761	0.00883667	0.391901	280.69	-	24	34454600	34473156	+	2424	protein_coding	PF00779:BTK motif|PF00169:PH domain|PF00616:GTPase-activator protein for Ras-like GTPase|PF00168:C2 domain	C2
ENSOARG00000012086	1208	2919	2553	3406	3367	4519	144.29	313.207	257.672	317.478	328.306	540.96	2226.67	3764	-0.729773	0.00888547	0.392907	2972.5	CD247	1	117694946	117700677	-	447	protein_coding	PF11628:T-cell surface glycoprotein CD3 zeta chain|PF02189:Immunoreceptor tyrosine-based activation motif	-
ENSOARG00000018590	767	202	252	263	198	141	19.3351	4.57436	5.36782	5.17376	4.07458	3.56224	407	200.667	1.18906	0.00890421	0.392907	311.571	MID2	X	120316611	120399810	-	2118	protein_coding	PF00622:SPRY domain|PF00041:Fibronectin type III domain|PF13445:RING-type zinc-finger|PF00643:B-box zinc finger	SPRY
ENSOARG00000000417	1106	1911	1784	1466	1140	910	147.999	229.717	201.718	153.087	124.53	122.039	1600.33	1172	0.535493	0.00903156	0.397525	1366.2	S100A9	1	102297137	102299291	+	399	protein_coding	PF01023:S-100/ICaBP type calcium binding domain	-
ENSOARG00000017634	430	679	590	774	1272	745	8.55706	12.1382	9.92099	12.0198	20.6638	14.8582	566.333	930.333	-0.635006	0.0090777	0.398265	733.352	SLC25A17	3	216040190	216082110	-	2683	protein_coding	PF00153:Mitochondrial carrier protein	Mito_carr
ENSOARG00000005372	155	394	286	474	496	534	7.20259	16.4468	11.2297	17.1884	18.815	24.8686	278.333	501.333	-0.801437	0.0091054	0.398265	384.698	-	11	52907987	52913409	+	1149	protein_coding	PF01212:Beta-eliminating lyase	Beta_elim_lyase
ENSOARG00000011243	82	128	183	228	245	253	8.06289	11.3062	15.2046	17.4949	19.6657	24.9316	131	242	-0.840609	0.00914709	0.398265	183.547	NT5C	11	55320196	55321611	+	543	protein_coding	PF06941:5' nucleotidase, deoxy (Pyrimidine), cytosolic type C protein (NT5C)	-
ENSOARG00000020095	211	466	297	631	650	429	7.40192	14.6851	8.8037	17.2739	18.6141	15.0825	324.667	570	-0.722726	0.00915799	0.398265	435.745	-	JH922168.1	13498	17947	-	1522	protein_coding	-	-
ENSOARG00000003463	5	5	3	39	4	44	0.113745	0.102179	0.0576676	0.692354	0.0742831	1.00316	4.33333	29	-2.69595	0.00916205	0.398265	16.7607	-	JH922795.1	20356	27371	+	2347	protein_coding	PF00530:Scavenger receptor cysteine-rich domain	SRCR
ENSOARG00000017083	425	433	462	247	346	305	19.9049	18.2175	18.2836	9.02753	13.2286	14.3161	440	299.333	0.626483	0.00923449	0.399911	370.601	QTRT1	5	12861497	12871083	+	1140	protein_coding	PF01702:Queuine tRNA-ribosyltransferase	TGT
ENSOARG00000013318	261	168	184	92	168	81	12.0652	6.97642	7.18719	3.31881	6.33973	3.75261	204.333	113.667	0.964476	0.00924558	0.399911	160.074	CHST10	3	100865567	100883794	+	1155	protein_coding	PF03567:Sulfotransferase family	-
ENSOARG00000018780	0	5	0	22	21	16	0	0.0748718	0	0.286182	0.285763	0.267297	1.66667	19.6667	-3.47838	0.00929599	0.401102	10.2402	C20orf202	13	59216749	59221933	-	3203	protein_coding	-	-
ENSOARG00000021048	17	10	20	23	54	90	0.53708	0.283804	0.533908	0.567046	1.39268	2.84961	15.6667	55.6667	-1.82305	0.00934224	0.401186	36.4067	SHF	7	62211776	62231319	+	1690	protein_coding	PF00017:SH2 domain	SH2
ENSOARG00000017114	84	43	120	44	41	13	0.655117	0.301257	0.790802	0.267789	0.26103	0.10161	82.3333	32.6667	1.46201	0.00934375	0.401186	56.926	ABCA4	1	70307340	70456088	-	6846	protein_coding	PF12698:ABC-2 family transporter protein|PF00005:ABC transporter	ABC_tran
ENSOARG00000001569	0	0	0	5	0	27	0	0	0	0.336012	0	2.33025	0	10.6667	-5.93527	0.00953832	0.40852	5.77136	-	JH922173.1	21	5466	-	620	protein_coding	-	-
ENSOARG00000018099	1275	1215	1376	1235	1068	652	21.9031	18.75	19.9738	16.5563	14.9773	11.2253	1288.67	985	0.501838	0.00958454	0.40852	1123.67	TLR8	X	10397399	10400506	+	3108	protein_coding	PF13855:Leucine rich repeat|PF01582:TIR domain	TIR
ENSOARG00000004103	311	314	382	566	442	636	1.40031	1.27006	1.45337	1.98876	1.62463	2.86996	335.667	548	-0.651239	0.00966127	0.409797	439.751	PTPN13	6	101134495	101327591	+	11858	protein_coding	PF09380:FERM C-terminal PH-like domain|PF00373:FERM central domain|PF00102:Protein-tyrosine phosphatase|PF09379:FERM N-terminal domain|PF16599:Unstructured linker region on PTN13 protein between PDZ|PF00595:PDZ domain (Also known as DHR or GLGF)	Y_phosphatase
ENSOARG00000000070	139	260	534	203	170	107	8.44311	14.187	27.4079	9.62241	8.42953	6.51366	311	160	1.02631	0.00968468	0.409798	229.393	-	JH922205.1	12040	12918	-	879	protein_coding	PF04548:AIG1 family	-
ENSOARG00000002815	2529	2999	3154	4063	3958	3811	49.5882	52.8244	52.2562	62.1693	63.3536	74.8896	2894	3944	-0.373691	0.00980403	0.412004	3380.9	PACS1	21	43458201	43604405	+	2723	protein_coding	PF10254:PACS-1 cytosolic sorting protein	-
ENSOARG00000004457	0	0	1	18	27	0	0	0	0.0639933	1.0638	1.66924	0	0.333333	15	-5.20766	0.00980738	0.412004	6.90376	-	18	33604837	33607684	-	705	protein_coding	PF00089:Trypsin	Trypsin
ENSOARG00000013521	31	36	55	108	82	83	0.159272	0.166153	0.238774	0.433014	0.34392	0.427375	40.6667	91	-1.0907	0.0099557	0.415505	64.2703	LAMA5	13	54200422	54247219	+	10392	protein_coding	PF00055:Laminin N-terminal (Domain VI)|PF00052:Laminin B (Domain IV)|PF02210:Laminin G domain|PF06008:Laminin Domain I|PF06009:Laminin Domain II|PF00053:Laminin EGF domain	Laminin_G_2
ENSOARG00000005525	4249	4685	5226	6408	6684	5949	97.4916	96.5647	101.32	114.737	125.194	136.797	4720	6347	-0.351065	0.0100601	0.418605	5468.86	MALT1	23	57844919	58052105	+	2327	protein_coding	PF13927:Immunoglobulin domain|PF00656:Caspase domain|PF13895:Immunoglobulin domain	Peptidase_C14
ENSOARG00000004016	280	493	540	350	310	218	4.83342	7.64491	7.87657	4.71482	4.36843	3.77144	437.667	292.667	0.662723	0.0101827	0.422703	359.239	NCAPG	6	37256548	37333851	+	3093	protein_coding	PF12719:Nuclear condensing complex subunits, C-term domain	-
ENSOARG00000006674	114	161	225	347	281	239	1.83114	2.32311	3.05383	4.34956	3.68458	3.8474	166.667	289	-0.719376	0.0102223	0.423344	221.92	GLI1	3	161886257	161893297	-	3324	protein_coding	-	-
ENSOARG00000015735	366	466	482	418	244	242	8.39772	9.60495	9.34489	7.4844	4.57022	5.5648	438	301.333	0.63324	0.0102494	0.423466	365.913	-	5	20049436	20104054	+	2327	protein_coding	PF00501:AMP-binding enzyme	AMP-binding
ENSOARG00000012958	37	43	52	2	6	21	0.546022	0.57004	0.648423	0.0230324	0.0722813	0.310585	44	9.66667	2.14828	0.0103269	0.424816	27.4509	ACE	11	47222569	47244014	+	3618	protein_coding	PF01401:Angiotensin-converting enzyme	Peptidase_M2
ENSOARG00000016406	73	67	92	34	51	10	1.18757	0.979133	1.26466	0.431636	0.67729	0.163039	77.3333	31.6667	1.42165	0.0104034	0.424816	53.9853	RBM46	17	2341537	2397756	-	3282	protein_coding	PF00076:RNA recognition motif. (a.k.a. RRM, RBD, or RNP domain)|PF14709:double strand RNA binding domain from DEAD END PROTEIN 1	RRM_1
ENSOARG00000009256	2082	4689	4083	5588	5703	5853	184.349	372.965	305.482	386.114	412.22	519.388	3618	5714.67	-0.610547	0.01043	0.424915	4597.81	CD3G	15	28521796	28529013	+	603	protein_coding	PF02189:Immunoreceptor tyrosine-based activation motif|PF16680:T-cell surface glycoprotein CD3 delta chain	-
ENSOARG00000000405	1618	2125	2516	3089	3156	2492	22.9634	27.0923	30.1728	34.2118	36.5647	35.4454	2086.33	2912.33	-0.404817	0.0104881	0.426288	2452.95	PPP1R16B	13	67238843	67316553	+	3762	protein_coding	PF12796:Ankyrin repeats (3 copies)	-
ENSOARG00000025735	124	73	77	232	243	117	4.77678	2.52618	2.5064	6.97432	7.64164	4.51703	91.3333	197.333	-0.969881	0.0105446	0.427595	140.293	-	2	1715164	1771388	+	1386	lincRNA	-	-
ENSOARG00000010465	61	112	61	163	233	109	1.26433	2.08534	1.06834	2.63644	3.94233	2.26418	78	168.333	-1.00316	0.0107195	0.432505	119.477	CRACR2A	3	210182576	210280028	+	2576	protein_coding	PF00071:Ras family|PF13499:EF-hand domain pair	Ras
ENSOARG00000002679	427	340	234	223	247	162	2.57726	1.84348	1.19342	1.05035	1.21701	0.979937	333.667	210.667	0.786868	0.0107327	0.432505	274.055	PPP1R9A	4	12069989	12406834	+	8846	protein_coding	PF00595:PDZ domain (Also known as DHR or GLGF)|PF07647:SAM domain (Sterile alpha motif)	SAM_2
ENSOARG00000013044	12	3	21	12	41	117	0.0778215	0.0174771	0.115076	0.0607295	0.217055	0.760428	12	56.6667	-2.29558	0.0107631	0.432505	35.9121	-	2	66897804	66998532	-	8233	protein_coding	PF00595:PDZ domain (Also known as DHR or GLGF)|PF07653:Variant SH3 domain|PF00625:Guanylate kinase	PDZ
ENSOARG00000006122	621	526	446	496	263	293	25.7626	19.6026	15.6343	16.0576	8.90677	12.182	531	350.667	0.713734	0.0107863	0.432505	441.628	GAS7	11	28603839	28684894	-	1287	protein_coding	PF16623:Unstructured linker region between on GAS7 protein|PF00397:WW domain|PF00611:Fes/CIP4, and EFC/F-BAR homology domain	WW
ENSOARG00000007469	0	6	0	18	13	33	0	0.154139	0	0.401703	0.303489	0.945801	2	21.3333	-3.40917	0.0108205	0.432505	11.7782	ANKRD55	16	23036892	23152286	+	1867	protein_coding	PF12796:Ankyrin repeats (3 copies)	-
ENSOARG00000013028	90	68	40	146	122	189	1.71434	1.16357	0.643814	2.17023	1.89706	3.60802	66	152.333	-1.12596	0.0108577	0.432505	109.708	KIRREL3	21	28988173	29122934	-	2803	protein_coding	PF07679:Immunoglobulin I-set domain|PF13895:Immunoglobulin domain|PF13927:Immunoglobulin domain	I-set
ENSOARG00000013079	78	181	136	247	434	156	2.37298	4.9466	3.49611	5.86404	10.7784	4.75639	131.667	279	-0.984933	0.0108755	0.432505	197.766	IL18RAP	3	99200154	99223905	-	1755	protein_coding	PF01582:TIR domain	TIR
ENSOARG00000001969	29	27	298	47	33	13	0.58385	0.48831	5.06951	0.738416	0.542355	0.262301	118	31	1.99027	0.0108879	0.432505	71.3193	BAC5	19	51566237	51569729	-	2652	protein_coding	PF00666:Cathelicidin	-
ENSOARG00000000291	15	11	6	1	1	0	0.140456	0.0925275	0.0474731	0.00730718	0.00764392	0	10.6667	0.666667	4.16322	0.0110275	0.435399	5.88725	FGB	17	2703888	2715375	-	5702	protein_coding	PF00147:Fibrinogen beta and gamma chains, C-terminal globular domain|PF08702:Fibrinogen alpha/beta chain family	Fibrinogen_C
ENSOARG00000007463	844	823	1193	993	352	438	130.617	114.416	156.007	119.924	44.47	67.9337	953.333	594.333	0.786576	0.0110348	0.435399	764.151	-	3	81644685	81657935	+	345	protein_coding	PF02238:Cytochrome c oxidase subunit VII	-
ENSOARG00000014444	9	53	23	66	172	50	0.426001	2.25358	0.919903	2.43788	6.64603	2.37187	28.3333	96	-1.66893	0.0110354	0.435399	59.4102	PRSS23	21	8160517	8161644	-	1128	protein_coding	PF00089:Trypsin	Trypsin
ENSOARG00000020020	2462	2446	2640	3529	3566	3177	97.5882	87.0952	88.4219	109.159	115.387	126.206	2516	3424	-0.361284	0.011152	0.435961	2938.38	TUBA4A	2	220175495	220179114	-	1347	protein_coding	PF03953:Tubulin C-terminal domain|PF00091:Tubulin/FtsZ family, GTPase domain	Tubulin
ENSOARG00000009414	2093	2154	2233	3031	3142	2622	35.7484	33.0493	32.2272	40.3993	43.8087	44.8822	2160	2931.67	-0.354085	0.0111598	0.435961	2515.35	ATP2C1	1	256985186	257068039	-	3126	protein_coding	PF00689:Cation transporting ATPase, C-terminus|PF00690:Cation transporter/ATPase, N-terminus|PF00702:haloacid dehalogenase-like hydrolase|PF00122:E1-E2 ATPase	E1-E2_ATPase
ENSOARG00000012520	1	0	0	4	5	21	0.0724451	0	0	0.226136	0.295696	1.52469	0.333333	10	-4.83945	0.0111866	0.435961	5.45441	CRISP3	20	22225611	22237519	-	737	protein_coding	PF00188:Cysteine-rich secretory protein family|PF08562:Crisp	SCP
ENSOARG00000016178	44	150	112	238	181	224	11.6878	35.7932	25.1389	49.3353	39.2487	59.6324	102	214.333	-1.02578	0.0112375	0.435961	155.217	-	7	1958310	1963660	+	201	protein_coding	-	-
ENSOARG00000020706	494	646	679	790	1049	892	11.8012	13.8631	13.7062	14.7274	20.457	21.3559	606.333	910.333	-0.521263	0.0112796	0.435961	749.561	SV2A	1	98921016	98929462	-	2235	protein_coding	PF07690:Major Facilitator Superfamily|PF13599:Pentapeptide repeats (9 copies)|PF00083:Sugar (and other) transporter	Sugar_tr
ENSOARG00000010789	43	64	79	158	105	115	1.4042	1.87745	2.17988	4.02639	2.79908	3.76366	62	126	-0.952248	0.0113166	0.435961	91.7732	BTBD3	13	4900219	4905937	+	1635	protein_coding	PF08005:PHR domain|PF00651:BTB/POZ domain|PF07707:BTB And C-terminal Kelch	BTB
ENSOARG00000007591	442	697	666	512	379	396	7.42583	10.5192	9.45461	6.71263	5.19791	6.66763	601.667	429	0.561318	0.0113427	0.435961	510.954	NLRP3	5	38188669	38233586	+	3178	protein_coding	PF14484:Fish-specific NACHT associated domain|PF02758:PAAD/DAPIN/Pyrin domain|PF05729:NACHT domain	NACHT
ENSOARG00000006957	63999	57620	52752	62253	36816	31926	1606.51	1299.31	1118.91	1219.47	754.419	803.17	58123.7	43665	0.534454	0.0113709	0.435961	50587.1	PSAP	25	27821576	27854699	-	2127	protein_coding	PF02199:Saposin A-type domain|PF05184:Saposin-like type B, region 1|PF03489:Saposin-like type B, region 2	-
ENSOARG00000011811	520	699	687	654	308	130	6.06198	7.3201	6.76729	5.94962	2.93109	1.51883	635.333	364	0.95106	0.0113731	0.435961	489.356	STEAP4	4	72387309	72395828	-	4580	protein_coding	PF01794:Ferric reductase like transmembrane component|PF03807:NADP oxidoreductase coenzyme F420-dependent	F420_oxidored
ENSOARG00000001924	0	9	5	16	22	49	0	0.438685	0.229244	0.677488	0.974475	2.6646	4.66667	29	-2.67313	0.0114299	0.437182	17.1405	-	13	60708643	60717327	-	984	protein_coding	PF00782:Dual specificity phosphatase, catalytic domain	DSPc
ENSOARG00000008867	278	552	479	292	278	284	14.9026	26.5818	21.697	12.2152	12.1655	15.2577	436.333	284.667	0.674561	0.011462	0.437452	358.108	PLAUR	14	50941331	50953437	-	996	protein_coding	PF00021:u-PAR/Ly-6 domain	-
ENSOARG00000001488	8	3	11	0	0	0	0.981923	0.330779	1.14085	0	0	0	7.33333	0	5.39437	0.0115626	NA	3.7318	HIST3H3	5	2283590	2284024	+	435	protein_coding	PF00125:Core histone H2A/H2B/H3/H4	Histone
ENSOARG00000006983	0	0	0	23	5	1	0	0	0	0.3821	0.0868932	0.0213355	0	9.66667	-5.52279	0.011566	NA	4.30496	LRGUK	4	97783152	97886698	+	2508	protein_coding	PF00625:Guanylate kinase|PF14580:Leucine-rich repeat	-
ENSOARG00000010233	8100	11386	11046	15817	13511	12335	130.225	164.44	150.058	198.441	177.322	198.747	10177.3	13887.7	-0.369622	0.0116564	0.441984	11836.7	ESYT1	3	163116786	163129742	-	3321	protein_coding	PF00168:C2 domain|PF17047:Synaptotagmin-like mitochondrial-lipid-binding domain	C2
ENSOARG00000012206	15	8	7	96	57	6	0.421738	0.202055	0.166302	2.10631	1.30826	0.169066	10	53	-2.19478	0.011685	0.442113	29.0663	CA5A	14	12842741	12871377	-	1899	protein_coding	PF00194:Eukaryotic-type carbonic anhydrase	-
ENSOARG00000012085	8948	6596	7252	7127	6381	3783	219.96	145.655	150.633	136.717	128.048	93.198	7598.67	5763.67	0.527015	0.0117526	0.44324	6639.5	TARS	16	40229272	40250506	-	2172	protein_coding	PF03129:Anticodon binding domain|PF07973:Threonyl and Alanyl tRNA synthetase second additional domain|PF02824:TGS domain|PF00587:tRNA synthetase class II core domain (G, H, P, S and T)	tRNA-synt_2b
ENSOARG00000009097	2554	1156	1105	1274	827	886	39.3886	16.0153	14.3999	15.3327	10.4117	13.6942	1605	995.667	0.822266	0.0118366	0.444197	1322.01	-	17	61009311	61042799	-	3462	protein_coding	PF01909:Nucleotidyltransferase domain|PF10421:2'-5'-oligoadenylate synthetase 1, domain 2, C-terminus	NTP_transf_2
ENSOARG00000007391	606	703	718	656	498	403	9.28958	9.68071	9.30025	7.84743	6.23188	6.1913	675.667	519	0.47851	0.011857	0.444197	591.218	ATP11A	10	85646749	85720794	+	3483	protein_coding	PF16212:Phospholipid-translocating P-type ATPase C-terminal|PF13246:Cation transport ATPase (P-type)|PF00122:E1-E2 ATPase|PF16209:Phospholipid-translocating ATPase N-terminal	E1-E2_ATPase
ENSOARG00000013987	0	0	0	10	5	8	0	0	0	0.514389	0.269047	0.528488	0	7.66667	-5.30429	0.0118703	NA	3.71568	ROPN1L	16	62619925	62639356	-	810	protein_coding	-	-
ENSOARG00000007023	633	503	768	1032	1236	720	20.992	14.9847	21.5208	26.7073	33.4608	23.9297	634.667	996	-0.549692	0.0118921	0.444197	797.264	PFKFB2	12	4141425	4164829	+	1610	protein_coding	PF01591:6-phosphofructo-2-kinase|PF00300:Histidine phosphatase superfamily (branch 1)	-
ENSOARG00000004854	1389	1803	2040	2530	2522	2149	35.0149	40.8296	43.4538	49.7704	51.8994	54.2926	1744	2400.33	-0.386394	0.0118922	0.444197	2038.74	-	20	31500643	31683584	+	2118	protein_coding	PF13483:Beta-lactamase superfamily domain	-
ENSOARG00000007535	7	1	0	33	25	14	0.512681	0.0657927	0	1.88609	1.49471	1.02762	2.66667	24	-2.96967	0.011972	0.445759	12.7158	GSTO2	22	23924028	23940751	+	729	protein_coding	PF13417:Glutathione S-transferase, N-terminal domain	-
ENSOARG00000020114	10	75	9	122	116	451	0.145482	0.980168	0.110637	1.38507	1.37764	6.57568	31.3333	229.667	-2.91476	0.0120088	0.445759	135.582	-	JH922507.1	2329	10019	-	3670	protein_coding	PF00530:Scavenger receptor cysteine-rich domain	SRCR
ENSOARG00000020776	3532	7454	7429	5996	2591	3254	115.129	218.263	204.616	152.519	68.944	106.3	6138.33	3947	0.714868	0.0120104	0.445759	4959.63	PLBD1	3	200132195	200220063	+	1638	protein_coding	PF04916:Phospholipase B	-
ENSOARG00000006966	4	13	9	24	31	47	0.0753327	0.219936	0.143223	0.352724	0.476598	0.887105	8.66667	34	-1.95747	0.0121737	0.450519	21.3557	UNC45B	11	14507566	14538339	-	2835	protein_coding	PF11701:Myosin-binding striated muscle assembly central	-
ENSOARG00000010419	220	103	249	116	81	107	9.64389	4.05598	9.22307	3.96815	2.89855	4.70075	190.667	101.333	0.988019	0.0121901	0.450519	146.876	-	2	246535166	246583871	+	1218	protein_coding	-	-
ENSOARG00000021916	26	21	26	5	10	3	12.9738	9.41328	10.9626	1.94699	4.07342	1.50026	24.3333	6	2.13664	0.0123183	0.453272	15.2908	RF00026	3	162924808	162924914	+	107	snRNA	-	-
ENSOARG00000013646	2607	4711	5098	5929	5915	7270	69.7011	113.146	115.172	123.703	129.098	194.799	4138.67	6371.33	-0.586172	0.0123352	0.453272	5206.38	ZAP70	3	103318538	103348207	-	1997	protein_coding	PF00017:SH2 domain|PF07714:Protein tyrosine kinase	Pkinase_Tyr
ENSOARG00000010357	2	30	0	0	0	0	0.0364575	0.491255	0	0	0	0	10.6667	0	5.92903	0.0123912	0.453272	5.40442	PIWIL2	2	43015372	43078982	-	2929	protein_coding	PF02170:PAZ domain|PF08699:Argonaute linker 1 domain|PF02171:Piwi domain	Piwi
ENSOARG00000010798	3	2	14	50	46	10	0.221544	0.132677	0.873601	2.88143	2.77308	0.740103	6.33333	35.3333	-2.3723	0.01245	0.454374	19.2864	-	13	6063924	6064738	-	723	protein_coding	PF13793:N-terminal domain of ribose phosphate pyrophosphokinase|PF14572:Phosphoribosyl synthetase-associated domain	-
ENSOARG00000016980	421	611	408	471	268	208	11.5807	15.0981	9.48327	10.1105	6.018	5.73414	480	315.667	0.723465	0.0124957	0.455092	393.842	ZCWPW1	24	36010508	36025563	+	1941	protein_coding	PF00855:PWWP domain|PF07496:CW-type Zinc Finger	PWWP
ENSOARG00000015795	0	1	0	8	9	11	0	0.0253772	0	0.176362	0.207551	0.311431	0.333333	9.33333	-4.6471	0.0125564	0.456081	4.76222	-	JH922278.1	72631	78918	+	1890	protein_coding	PF13520:Amino acid permease|PF13906:C-terminus of AA_permease	-
ENSOARG00000011734	2388	1954	2193	1519	1854	1611	84.8305	62.355	65.8269	42.1091	53.7643	57.3544	2178.33	1661.33	0.475012	0.0126369	0.457384	1924.58	FBXO31	14	12415534	12451774	-	1503	protein_coding	-	-
ENSOARG00000006175	255	318	244	339	630	443	15.2634	17.0989	12.3409	15.8348	30.7836	26.5747	272.333	470.667	-0.71148	0.0128093	0.462667	367.719	PHOSPHO1	11	36883863	36888240	+	892	protein_coding	PF06888:Putative Phosphatase	-
ENSOARG00000001658	0	0	0	5	2	16	0	0	0	0.317089	0.132681	1.30312	0	7.66667	-5.41317	0.0128729	NA	4.02241	RFLNA	17	51055545	51069048	-	657	protein_coding	PF15068:FAM101 family	-
ENSOARG00000007174	2	11	0	57	11	29	0.0468351	0.2314	0	1.04164	0.210282	0.680602	4.33333	32.3333	-2.79745	0.0129066	0.465221	17.6269	KIRREL1	1	106985111	107003419	+	2280	protein_coding	PF13927:Immunoglobulin domain|PF08205:CD80-like C2-set immunoglobulin domain	-
ENSOARG00000004129	20	62	10	64	30	257	1.50189	4.18242	0.634533	3.75048	1.83906	19.3417	30.6667	117	-1.97645	0.0129467	0.465709	77.6123	-	10	75606785	75607852	-	711	protein_coding	PF00001:7 transmembrane receptor (rhodopsin family)	7tm_1
ENSOARG00000016816	269	270	344	245	226	153	10.2957	9.28314	11.1252	7.3176	7.06118	5.86878	294.333	208	0.598567	0.0129999	0.466663	248.558	SLC49A3	6	116890482	116894747	+	1395	protein_coding	PF07690:Major Facilitator Superfamily	MFS_1
ENSOARG00000009987	0	0	0	6	5	11	0	0	0	0.688686	0.600353	1.6215	0	7.33333	-5.29206	0.0130264	NA	3.69237	-	JH922015.1	12492	13071	-	363	protein_coding	PF07686:Immunoglobulin V-set domain	V-set
ENSOARG00000020950	808	697	694	648	601	427	9.19846	7.12796	6.6759	5.75677	5.58528	4.87175	733	558.667	0.502429	0.0130499	0.467503	643.109	GNB5	7	55171850	55212743	+	4690	protein_coding	PF00400:WD domain, G-beta repeat	WD40
ENSOARG00000001834	345	371	346	293	284	205	12.3543	11.9344	10.4694	8.18779	8.30202	7.3571	354	260.667	0.541492	0.013143	0.468823	305.544	-	7	83681822	83738511	+	1491	protein_coding	PF07690:Major Facilitator Superfamily	MFS_1
ENSOARG00000005696	335	208	161	392	724	325	24.4349	13.6288	9.92289	22.3127	43.1093	23.7576	234.667	480.333	-0.897403	0.0131497	0.468823	351.115	MPIG6B	20	26724689	26726375	-	732	protein_coding	PF15096:G6B family	-
ENSOARG00000000527	52	60	30	98	99	127	3.7774	3.91534	1.84144	5.5554	5.87072	9.24585	47.3333	108	-1.11721	0.0135119	0.479153	77.6137	-	AMGL01122105.1	1885	2644	-	735	protein_coding	PF05461:Apolipoprotein L	-
ENSOARG00000018883	0	0	3	6	5	34	0	0	0.151393	0.279634	0.243767	2.03503	1	15	-4.02237	0.0135524	0.479619	8.46118	-	3	217101404	217109088	+	894	protein_coding	-	-
ENSOARG00000013986	1614	1663	1592	1470	1306	1195	114.442	105.926	95.3831	81.3391	75.5947	84.9187	1623	1323.67	0.384185	0.0136394	0.480128	1468.11	TMEM127	3	104018919	104028274	+	753	protein_coding	-	-
ENSOARG00000006305	733	481	668	387	502	416	40.2638	23.7347	31.0051	16.5891	22.5103	22.9012	627.333	435	0.615478	0.0136487	0.480128	533.558	-	15	50506697	50530208	-	972	protein_coding	PF01852:START domain	START
ENSOARG00000013484	44	106	51	155	110	178	0.857704	1.85618	0.840043	2.35785	1.75043	3.47743	67	147.667	-1.09108	0.013731	0.480128	106.672	KIAA1211L	3	102274812	102343301	+	2739	protein_coding	PF15262:Domain of unknown function (DUF4592)	-
ENSOARG00000002701	341	92	266	156	58	112	15.022	3.64075	9.90153	5.36289	2.08578	4.94477	233	108.667	1.20411	0.0137788	0.480128	173.532	-	JH923067.1	2795	5067	+	1212	protein_coding	PF07686:Immunoglobulin V-set domain	V-set
ENSOARG00000016807	43016	40861	42156	45108	31893	23264	833.35	711.107	690.087	681.948	504.382	451.685	42011	33421.7	0.447187	0.0137847	0.480128	37321.4	SAMHD1	13	65496603	65550669	-	2756	protein_coding	PF01966:HD domain	HD
ENSOARG00000006586	2	2	0	20	7	17	0.115567	0.103816	0	0.901851	0.330194	0.984481	1.33333	14.6667	-3.36147	0.0137861	0.480128	7.86859	PDGFC	17	42106061	42211532	+	924	protein_coding	PF00431:CUB domain|PF00341:PDGF/VEGF domain	CUB
ENSOARG00000015222	2	4	25	0	1	0	0.988742	1.7764	10.4433	0	0.403571	0	10.3333	0.333333	4.85666	0.0138851	0.482617	5.14473	-	1	233646715	233646822	+	108	protein_coding	-	-
ENSOARG00000008332	1355	2829	2500	3220	3552	3495	87.6924	164.469	136.713	162.622	187.656	226.685	2228	3422.33	-0.568653	0.0139241	0.483014	2786.31	CD27	3	207881562	207886152	-	825	protein_coding	-	-
ENSOARG00000020655	258	464	475	654	643	566	9.07454	14.6606	14.1171	17.9508	18.4622	19.9515	399	621	-0.572992	0.0140182	0.48436	500.154	B3GNT5	1	202015373	202033719	-	1518	protein_coding	PF01762:Galactosyltransferase	Galactosyl_T
ENSOARG00000019120	0	0	0	0	0	38	0	0	0	0	0	0.269176	0	12.6667	-6.23451	0.0141244	0.486359	7.09608	MYO18B	17	65228017	65452813	+	7554	protein_coding	PF00063:Myosin head (motor domain)	Myosin_head
ENSOARG00000014729	737	1274	1116	990	654	619	38.5784	59.9066	49.3614	40.4401	27.9461	32.4729	1042.33	754.333	0.551478	0.0141593	0.486359	887.13	CD68	11	26871536	26873310	+	1020	protein_coding	PF01299:Lysosome-associated membrane glycoprotein (Lamp)	-
ENSOARG00000008620	95	170	254	117	62	91	1.01996	1.63959	2.3043	0.980267	0.543396	0.979159	173	90	0.991115	0.0142315	0.487882	129.86	LTF	19	52870333	52903163	+	4973	protein_coding	PF00405:Transferrin	-
ENSOARG00000003180	107	122	80	66	67	33	8.03509	8.22992	5.07626	3.86769	4.10722	2.48356	103	55.3333	1.02225	0.0142847	0.487895	79.0574	IL27	24	26070181	26075232	-	711	protein_coding	-	-
ENSOARG00000002514	6	3	0	34	25	11	0.119713	0.0537701	0	0.529383	0.40719	0.219957	3	23.3333	-2.76779	0.0143122	0.487895	12.4505	-	AMGL01123989.1	21	6244	-	2676	protein_coding	PF00530:Scavenger receptor cysteine-rich domain	SRCR
ENSOARG00000021170	955	1306	1141	991	1033	575	27.3695	33.6229	27.631	22.1635	24.1674	16.5153	1134	866.333	0.494304	0.0143194	0.487895	986.845	ARG2	7	76378646	76418618	+	1863	protein_coding	PF00491:Arginase family	-
ENSOARG00000015742	1372	1832	1508	2172	2363	2111	17.4497	20.9309	16.2062	21.5573	24.5338	26.9077	1570.67	2215.33	-0.419334	0.0143433	0.487895	1872.83	IL16	18	26027666	26139840	+	4198	protein_coding	PF00595:PDZ domain (Also known as DHR or GLGF)	PDZ
ENSOARG00000008681	401	334	491	270	308	281	15.6737	11.7274	16.2164	8.2355	9.82751	11.0074	408.667	286.333	0.586492	0.0143861	0.488402	347.178	SPSB1	12	42252775	42265065	-	1366	protein_coding	PF07525:SOCS box|PF00622:SPRY domain	SPRY
ENSOARG00000003352	887	904	1250	1081	561	487	34.0956	31.2156	40.6005	32.4265	17.6037	18.761	1013.67	709.667	0.621264	0.0145106	0.490761	848.634	NFIL3	2	26301791	26303179	-	1389	protein_coding	PF06529:Vertebrate interleukin-3 regulated transcription factor|PF07716:Basic region leucine zipper	Vert_IL3-reg_TF
ENSOARG00000021738	389	469	568	804	744	542	164.837	178.529	203.377	265.866	257.363	230.175	475.333	696.667	-0.462853	0.0146481	0.493472	572.913	-	11	48097414	48097539	-	126	miRNA	-	-
ENSOARG00000011273	251	253	371	206	251	114	12.9859	11.7583	16.2188	8.31696	10.6008	5.91092	291.667	190.333	0.719586	0.014724	0.495078	237.458	ZAR1L	10	28927460	28935529	+	1032	protein_coding	PF13695:Zinc-binding domain	-
ENSOARG00000002277	3	2	0	9	18	20	0.230138	0.137824	0	0.538778	1.12721	1.53763	1.66667	15.6667	-3.14881	0.0151029	0.505852	8.68904	-	3	1442982	2818577	-	696	protein_coding	-	-
ENSOARG00000016186	2959	2465	1660	1959	1647	1504	147.928	110.701	70.123	76.4258	67.2149	75.3541	2361.33	1703.33	0.585038	0.015163	0.505852	2045.16	-	11	18969861	18988041	+	1068	protein_coding	PF00337:Galactoside-binding lectin	-
ENSOARG00000003327	66	112	141	74	24	48	0.638152	0.972808	1.15198	0.558357	0.189434	0.465131	106.333	48.6667	1.19004	0.0151636	0.505852	76.7781	SIPA1L2	25	5236879	5419436	-	5522	protein_coding	PF02145:Rap/ran-GAP|PF11881:C-terminal domain of SPAR protein	-
ENSOARG00000008984	2300	6699	5408	8349	7438	7865	184.387	482.438	366.341	522.321	486.772	631.909	4802.33	7884	-0.667151	0.0151888	0.505852	6228.07	CD3E	15	28501024	28510846	+	666	protein_coding	PF16681:Ig-like domain on T-cell surface glycoprotein CD3 epsilon chain	-
ENSOARG00000001186	55	123	72	137	74	446	0.58743	1.18012	0.64979	1.14186	0.645196	4.774	83.3333	219	-1.43635	0.0152281	0.506196	156.817	-	3	205622220	205709408	+	4999	protein_coding	PF00530:Scavenger receptor cysteine-rich domain	SRCR
ENSOARG00000007152	3	2	19	50	44	20	0.271026	0.162311	1.45041	3.525	3.24495	1.81081	8	38	-2.1759	0.0152662	0.506504	21.6383	TM4SF5	11	26196051	26202135	-	591	protein_coding	PF05805:L6 membrane protein	-
ENSOARG00000010784	325	359	465	323	217	259	10.5743	10.4928	12.784	8.20108	5.76361	8.44542	383	266.333	0.596328	0.015351	0.507593	322.835	SLC1A5	14	52938799	52948858	-	1641	protein_coding	PF00375:Sodium:dicarboxylate symporter family	SDF
ENSOARG00000013014	523	501	688	959	1052	598	15.9111	13.692	17.6862	22.7677	26.1265	18.2328	570.667	869.667	-0.506573	0.015357	0.507593	702.28	SLC9A8	13	77450040	77517204	+	1755	protein_coding	PF00999:Sodium/hydrogen exchanger family	Na_H_Exchanger
ENSOARG00000015998	0	0	0	1	19	5	0	0	0	0.0134971	0.268263	0.086669	0	8.33333	-5.40454	0.0154294	NA	3.97881	MYO1H	17	63380145	63420305	-	3087	protein_coding	PF00063:Myosin head (motor domain)|PF06017:Unconventional myosin tail, actin- and lipid-binding	Myosin_head
ENSOARG00000006156	51	75	71	137	262	65	0.747049	0.986891	0.878788	1.56603	3.1329	0.954215	65.6667	154.667	-1.11589	0.0154627	0.509261	105.402	ADAMTS14	25	26641819	26738748	+	3645	protein_coding	PF01421:Reprolysin (M12B) family zinc metalloprotease|PF01562:Reprolysin family propeptide|PF05986:ADAM-TS Spacer 1|PF00090:Thrombospondin type 1 domain	TSP_1
ENSOARG00000020748	314	358	524	362	273	195	3.86026	3.95365	5.44333	3.47293	2.73978	2.40256	398.667	276.667	0.620466	0.0154825	0.509261	332.218	FNDC3B	1	213189221	213466453	-	4343	protein_coding	PF00041:Fibronectin type III domain	fn3
ENSOARG00000004174	140	71	27	43	26	23	11.0739	5.04499	1.80461	2.65425	1.67885	1.82328	79.3333	30.6667	1.5354	0.0156424	0.511171	56.8059	TAGLN	15	27382416	27383822	+	675	protein_coding	PF00307:Calponin homology (CH) domain|PF00402:Calponin family repeat	CH
ENSOARG00000003435	32	33	84	14	26	13	1.44547	1.33907	3.20616	0.4935	0.958736	0.588513	49.6667	17.6667	1.55441	0.0157114	0.511171	33.2041	VWA1	12	49179248	49182963	-	1182	protein_coding	PF00041:Fibronectin type III domain|PF00092:von Willebrand factor type A domain	VWA
ENSOARG00000002054	17	68	42	74	69	203	1.59519	5.73195	3.33012	5.41872	5.28543	19.0904	42.3333	115.333	-1.47623	0.0157221	0.511171	80.4394	-	AMGL01122899.1	1624	2532	+	569	protein_coding	PF00530:Scavenger receptor cysteine-rich domain	SRCR
ENSOARG00000008330	1379	1327	1409	1859	1988	1946	33.8518	29.2629	29.2264	35.6121	39.8383	47.8756	1371.67	1931	-0.417441	0.0157455	0.511171	1640.1	WDR91	4	98800327	98825061	-	2175	protein_coding	-	-
ENSOARG00000012429	6364	8471	4981	7460	16293	9756	1231.11	1472.08	814.2	1126.18	2572.97	1891.44	6605.33	11169.7	-0.669078	0.0157634	0.511171	8790.06	-	17	62424499	62426333	+	276	protein_coding	-	-
ENSOARG00000010366	35	21	25	59	69	74	4.38667	2.36437	2.64761	5.77058	7.05964	9.29506	27	67.3333	-1.23763	0.0157807	0.511171	46.9496	RBPMS	26	25254043	25296123	+	426	protein_coding	PF00076:RNA recognition motif. (a.k.a. RRM, RBD, or RNP domain)	RRM_1
ENSOARG00000001865	2099	1063	1498	1229	1303	691	44.8998	20.4265	27.0764	20.5156	22.7532	14.8137	1553.33	1074.33	0.667907	0.0157863	0.511171	1313.31	RIN2	13	38609366	38671551	+	2496	protein_coding	PF00788:Ras association (RalGDS/AF-6) domain|PF02204:Vacuolar sorting protein 9 (VPS9) domain	VPS9
ENSOARG00000002370	25	8	23	5	3	3	0.39679	0.114062	0.308458	0.0619285	0.0388695	0.0477195	18.6667	3.66667	2.45847	0.0159991	0.516154	11.3821	PCDH19	X	126928343	127052215	+	3364	protein_coding	PF00028:Cadherin domain|PF08266:Cadherin-like	Cadherin
ENSOARG00000009195	53	29	64	25	19	2	0.827663	0.406822	0.844509	0.304662	0.242213	0.0313012	48.6667	15.3333	1.82938	0.0161121	0.518523	31.7716	PLCB1	13	666266	1154527	+	3419	protein_coding	PF08703:PLC-beta C terminal|PF09279:Phosphoinositide-specific phospholipase C, efhand-like|PF06631:Protein of unknown function (DUF1154)|PF00387:Phosphatidylinositol-specific phospholipase C, Y domain|PF00388:Phosphatidylinositol-specific phospholipase C, X domain	PI-PLC-X
ENSOARG00000004727	6	9	23	60	39	30	0.195934	0.264016	0.634649	1.52901	1.03966	0.981824	12.6667	43	-1.6898	0.0161436	0.518523	26.5666	ANKUB1	1	236401591	236432933	+	1635	protein_coding	PF12796:Ankyrin repeats (3 copies)	-
ENSOARG00000011568	119	139	168	183	233	387	4.65469	4.88413	5.55265	5.58593	7.43989	15.1708	142	267.667	-0.898088	0.0162219	0.518523	206.548	GCNT4	7	6290836	6292200	-	1365	protein_coding	PF02485:Core-2/I-Branching enzyme	-
ENSOARG00000020260	146	120	165	241	347	178	1.8359	1.35552	1.75318	2.36491	3.56199	2.24321	143.667	255.333	-0.726594	0.0162501	0.518523	194.749	ZFP69	1	14827355	14845136	+	4246	protein_coding	PF00096:Zinc finger, C2H2 type|PF01352:KRAB box	KRAB
ENSOARG00000015114	127	196	22	68	18	34	1.17477	1.62868	0.171957	0.490862	0.135922	0.315198	115	40	1.65667	0.0163314	0.520169	79.0382	CYP24A1	13	81169296	81193410	-	5772	protein_coding	PF00067:Cytochrome P450	p450
ENSOARG00000003228	1510	1541	1518	1568	1209	709	53.9639	49.4718	45.84	43.7293	35.2711	25.3937	1523	1162	0.513999	0.0164254	0.521422	1325.32	SLC2A6	3	2450179	2458966	+	1494	protein_coding	PF00083:Sugar (and other) transporter	Sugar_tr
ENSOARG00000014087	20	68	13	122	75	95	0.183825	0.561452	0.100964	0.875055	0.562734	0.87509	33.6667	97.3333	-1.45036	0.01644	0.521422	64.1685	SCN4A	11	47563592	47595132	-	5809	protein_coding	PF00520:Ion transport protein|PF06512:Sodium ion transport-associated	Ion_trans
ENSOARG00000001568	13	1	0	37	49	19	0.201597	0.0139306	0	0.447756	0.620301	0.295289	4.66667	35	-2.69015	0.0165084	0.521422	19.0137	-	20	26463053	26475301	-	3443	protein_coding	PF10569:Alpha-macro-globulin thiol-ester bond-forming region|PF01835:MG2 domain|PF00207:Alpha-2-macroglobulin family|PF07678:A-macroglobulin complement component	A2M_comp
ENSOARG00000020672	4887	4130	6681	4136	5103	2436	39.6606	30.1089	45.8147	26.1937	33.8072	19.8129	5232.67	3891.67	0.533347	0.0165186	0.521422	4495.81	NIN	7	40670148	40769703	-	6579	protein_coding	-	-
ENSOARG00000004314	8	58	31	78	51	166	1.63654	10.6584	5.35852	12.4518	8.51673	34.0328	32.3333	98.3333	-1.63208	0.0165195	0.521422	66.2747	-	12	71772867	71773127	-	261	protein_coding	-	-
ENSOARG00000000985	25	12	6	1	3	2	1.96873	0.848901	0.39925	0.0614536	0.192857	0.157845	14.3333	2	2.9685	0.0168997	0.529649	8.5978	-	AMGL01120380.1	1552	4178	+	678	protein_coding	PF01747:ATP-sulfurylase	-
ENSOARG00000009330	15	20	13	26	133	23	0.150372	0.180109	0.11012	0.203399	1.08841	0.231077	16	60.6667	-1.79374	0.0169327	0.529649	36.5864	LYPD6	2	158772166	158810428	-	5326	protein_coding	PF16975:Ly6/PLAUR domain-containing protein 6, Lypd6	-
ENSOARG00000003733	651	412	401	274	449	226	52.7439	29.9859	27.4525	17.3238	29.6964	18.3507	488	316.333	0.750682	0.0169392	0.529649	404.478	TMEM154	17	4832841	4882002	+	659	protein_coding	PF15102:TMEM154 protein family	-
ENSOARG00000008392	787	537	480	591	274	304	9.20069	5.6396	4.7417	5.39179	2.61495	3.56183	601.333	389.667	0.757094	0.0169503	0.529649	497.379	TCN2	17	69080977	69099100	+	4567	protein_coding	PF01122:Eukaryotic cobalamin-binding protein	-
ENSOARG00000021021	604	1078	1147	822	653	576	58.106	93.1604	93.2382	61.71	51.2818	55.5341	943	683.667	0.537186	0.0169616	0.529649	801.669	-	7	59034467	59046608	-	555	protein_coding	PF00692:dUTPase	-
ENSOARG00000007200	0	0	1	5	8	13	0	0	0.0712721	0.329112	0.550845	1.09893	0.333333	8.66667	-4.57501	0.0169846	NA	4.53568	FAM180B	15	75620082	75621805	+	633	protein_coding	PF15173:FAM180 family	-
ENSOARG00000004128	170	221	257	126	139	150	35.5947	41.5678	45.4691	20.5877	23.7584	31.4761	216	138.333	0.697767	0.0170317	0.530256	176.949	PKIG	13	72588722	72592434	+	255	protein_coding	-	-
ENSOARG00000018416	3168	2598	3182	2243	2888	1948	80.9311	59.6209	68.6874	44.7157	60.2274	49.8739	2982.67	2359.67	0.433871	0.0170486	0.530256	2660.52	-	6	11917649	12238606	+	2090	protein_coding	PF08332:Calcium/calmodulin dependent protein kinase II association domain|PF00069:Protein kinase domain	Pkinase
ENSOARG00000010676	61	20	93	192	176	77	2.7209	0.801385	3.5052	6.68319	6.40858	3.44213	58	148.333	-1.23629	0.0170718	0.530256	98.658	-	24	7716171	7717367	+	1197	protein_coding	PF00226:DnaJ domain|PF00684:DnaJ central domain|PF01556:DnaJ C terminal domain	DnaJ_C
ENSOARG00000006610	37	76	33	21	18	18	0.347433	0.64108	0.261837	0.153883	0.137978	0.169393	48.6667	19	1.44012	0.0171257	0.530988	34.0275	BCAR1	14	1953843	1969183	-	5686	protein_coding	PF12026:Domain of unknown function (DUF3513)|PF08824:Serine rich protein interaction domain	-
ENSOARG00000006340	788	701	864	833	451	411	22.3317	17.8461	20.6898	18.4222	10.4337	11.6732	784.333	565	0.585003	0.0172422	0.53125	668.012	GAB2	21	17151857	17207840	+	1884	protein_coding	PF00169:PH domain	PH
ENSOARG00000003932	19	32	38	85	48	82	0.300845	0.455164	0.508416	1.05029	0.620436	1.30124	29.6667	71.6667	-1.22671	0.0172787	0.53125	49.9474	RET	25	13412338	13441356	+	3372	protein_coding	PF07714:Protein tyrosine kinase|PF00028:Cadherin domain	Pkinase_Tyr
ENSOARG00000004370	369	1281	1438	679	436	617	58.117	181.24	191.374	83.454	56.057	97.3903	1029.33	577.333	0.863904	0.0173047	0.53125	791.551	-	11	42498733	42499925	+	339	protein_coding	PF01777:Ribosomal L27e protein family	-
ENSOARG00000012711	523	432	510	496	274	257	9.08099	6.7382	7.48253	6.72068	3.88373	4.47217	488.333	342.333	0.625911	0.0173071	0.53125	412.657	RBM47	6	59351088	59449924	-	3075	protein_coding	PF00076:RNA recognition motif. (a.k.a. RRM, RBD, or RNP domain)	RRM_1
ENSOARG00000015185	30	63	80	182	90	106	0.830789	1.56725	1.872	3.93316	2.0346	2.94191	57.6667	126	-1.05785	0.0173241	0.53125	88.8717	ARSG	11	60677902	60777644	-	1928	protein_coding	PF00884:Sulfatase	Sulfatase
ENSOARG00000004843	1385	952	1343	1073	1068	601	44.7627	27.6396	36.6766	27.0624	28.1776	19.4668	1226.67	914	0.544181	0.0173415	0.53125	1061.69	C1GALT1	4	15148060	15195953	+	1652	protein_coding	PF02434:Fringe-like	Fringe
ENSOARG00000002546	253	347	228	246	119	153	15.3677	18.9342	11.7023	11.6607	5.90067	9.31393	276	172.667	0.774504	0.0173528	0.53125	223.988	-	JH922832.1	7903	11061	+	879	protein_coding	PF13895:Immunoglobulin domain	-
ENSOARG00000008907	952	1028	1159	846	945	753	13.8537	13.4385	14.2515	9.60726	11.2261	10.9819	1046.33	848	0.384951	0.0174588	0.532827	941.162	TIMELESS	3	162884028	162897249	+	3669	protein_coding	PF05029:Timeless protein C terminal region|PF04821:Timeless protein	TIMELESS_C
ENSOARG00000003494	0	16	0	51	9	68	0	0.270977	0	0.750333	0.138514	1.28483	5.33333	42.6667	-2.99754	0.0175094	0.532827	24.195	-	3	206818852	206849389	-	2832	protein_coding	PF00530:Scavenger receptor cysteine-rich domain	SRCR
ENSOARG00000017740	48	46	51	18	31	11	1.70855	1.47086	1.53392	0.499986	0.90077	0.392402	48.3333	20	1.38669	0.0175196	0.532827	34.1282	MFSD2B	3	31557826	31570590	+	1500	protein_coding	PF13347:MFS/sugar transport protein	-
ENSOARG00000012839	61	58	53	109	189	75	2.52474	2.15647	1.85357	3.52058	6.3858	3.11101	57.3333	124.333	-0.998558	0.0175702	0.533439	88.216	PM20D2	8	48106421	48119621	-	1290	protein_coding	PF01546:Peptidase family M20/M25/M40|PF07687:Peptidase dimerisation domain	M20_dimer
ENSOARG00000015755	68	109	113	75	34	40	2.74634	3.95458	3.8563	2.36378	1.12096	1.61904	96.6667	49.6667	1.04758	0.0176731	0.535386	72.4034	-	24	20035256	20062056	-	1322	protein_coding	-	-
ENSOARG00000010111	79	139	115	198	190	193	4.6556	7.35855	5.72655	9.10571	9.14047	11.3988	111	193.667	-0.738164	0.0176954	0.535386	150.12	-	X	125785946	125786851	-	906	protein_coding	PF04826:Armadillo-like	-
ENSOARG00000003667	22	95	48	21	20	19	0.546846	2.12126	1.00816	0.407345	0.405825	0.473314	55	20	1.51828	0.0177676	0.536172	37.2789	ZBTB47	19	14718770	14724982	+	2148	protein_coding	PF00651:BTB/POZ domain	BTB
ENSOARG00000015406	589	461	453	849	774	677	16.0285	11.2696	10.4165	18.0296	17.1943	18.4638	501	766.667	-0.511126	0.0178023	0.536172	627.044	DIXDC1	15	21727589	21767102	+	1962	protein_coding	PF00778:DIX domain	DIX
ENSOARG00000009154	3260	2907	2334	2610	2370	1642	61.4178	49.1984	37.1556	38.3723	36.4495	31.003	2833.67	2207.33	0.480329	0.0178356	0.536172	2512.92	STAT2	3	162925811	162936835	+	2834	protein_coding	PF02865:STAT protein, protein interaction domain|PF00017:SH2 domain|PF01017:STAT protein, all-alpha domain|PF12188:Signal transducer and activator of transcription 2 C terminal|PF02864:STAT protein, DNA binding domain	STAT_bind
ENSOARG00000019811	16	40	32	4	12	8	1.08686	2.44086	1.83675	0.212038	0.665429	0.544625	29.3333	8	1.92353	0.0178438	0.536172	18.654	RSPO1	1	12198285	12212782	-	786	protein_coding	PF15913:Furin-like repeat, cysteine-rich	-
ENSOARG00000021066	0	0	0	11	8	3	0	0	0	0.0816389	0.0621099	0.0285943	0	7.33333	-5.17444	0.0181175	NA	3.38564	THEM5	1	100688677	100701982	-	5614	protein_coding	-	-
ENSOARG00000004721	183	20	22	41	13	11	36.5946	3.59273	3.71736	6.39808	2.12215	2.20451	75	21.6667	2.02363	0.018163	0.542749	50.9621	-	11	14021615	14026742	+	267	protein_coding	-	-
ENSOARG00000009969	1404	1073	950	1168	645	618	162.256	111.394	92.7695	105.336	60.8501	71.5775	1142.33	810.333	0.622198	0.0181811	0.542749	975.947	UBE2L6	15	78023427	78030523	-	462	protein_coding	PF00179:Ubiquitin-conjugating enzyme	UQ_con
ENSOARG00000000856	15	1	2	123	8	12	2.51849	0.150827	0.283744	16.1159	1.09649	2.01922	6	47.6667	-2.72438	0.0181866	0.542749	24.6848	-	7	42248640	42248957	+	318	protein_coding	PF00034:Cytochrome c	-
ENSOARG00000020794	5	17	15	65	41	22	0.68982	2.1069	1.74865	6.99809	4.6176	3.04188	12.3333	42.6667	-1.68627	0.0182582	0.543789	25.9991	-	3	59347194	59347794	-	387	protein_coding	PF07686:Immunoglobulin V-set domain	V-set
ENSOARG00000004290	79	85	49	36	24	38	9.63008	9.30787	5.04714	3.42456	2.38825	4.64237	71	32.6667	1.20124	0.0182979	0.543789	52.732	-	11	26098763	26099200	-	438	protein_coding	PF00595:PDZ domain (Also known as DHR or GLGF)	PDZ
ENSOARG00000010984	1	44	16	20	67	176	0.0291282	1.15132	0.393805	0.454616	1.59315	5.13784	20.3333	87.6667	-2.18278	0.0183217	0.543789	56.1004	PDE9A	1	261034826	261110406	+	1833	protein_coding	PF00233:3'5'-cyclic nucleotide phosphodiesterase	-
ENSOARG00000008232	549	284	420	165	372	214	10.8524	5.04312	7.01533	2.54528	6.00291	4.23955	417.667	250.333	0.840197	0.0183457	0.543789	337.105	GUCY1A1	17	43258162	43319709	-	2701	protein_coding	PF00211:Adenylate and Guanylate cyclase catalytic domain|PF07701:Heme NO binding associated	Guanylate_cyc
ENSOARG00000009580	0	0	0	20	10	0	0	0	0	0.145429	0.0760657	0	0	10	-5.56761	0.0185472	NA	4.44353	LAMA4	8	25298969	25445606	+	5730	protein_coding	PF00053:Laminin EGF domain|PF06008:Laminin Domain I|PF02210:Laminin G domain|PF06009:Laminin Domain II	Laminin_G_2
ENSOARG00000005741	1747	2334	2169	2921	2722	3181	19.9095	23.8944	20.8869	25.9776	25.3234	36.3316	2083.33	2941.33	-0.437469	0.0185555	0.549079	2495.18	FAM117A	11	36435040	36455430	+	4685	protein_coding	PF15388:Protein Family FAM117	-
ENSOARG00000002039	1997	1978	2589	1721	1946	1635	257.546	229.156	282.134	173.204	204.873	211.323	2188	1767.33	0.383544	0.0186145	0.549897	1966.24	CMTM3	14	33709046	33712756	+	414	protein_coding	PF01284:Membrane-associating domain	-
ENSOARG00000020913	434	427	466	668	644	586	14.1553	12.5108	12.8428	17.0022	17.1467	19.1549	442.333	632.667	-0.432265	0.018752	0.553027	531.266	PRUNE1	1	99863474	99881885	+	1637	protein_coding	PF01368:DHH family|PF02833:DHHA2 domain	-
ENSOARG00000018083	1441	1464	1598	1490	1195	1046	34.7978	31.7583	32.6071	28.0785	23.5571	25.3147	1501	1243.67	0.365121	0.0189256	0.555674	1361.59	-	11	33465857	33479627	-	2211	protein_coding	PF00171:Aldehyde dehydrogenase family	Aldedh
ENSOARG00000016049	47	93	87	122	137	186	7.211	12.8177	11.2788	14.6069	17.1587	28.5999	75.6667	148.333	-0.941808	0.0189256	0.555674	111.536	-	4	105377409	105377906	+	348	protein_coding	PF07686:Immunoglobulin V-set domain	V-set
ENSOARG00000019012	1405	2408	1005	1951	4242	2472	76.9393	118.456	46.5034	83.3738	189.631	135.667	1606	2888.33	-0.757171	0.018992	0.555674	2218.04	-	13	59696132	59701506	+	975	protein_coding	PF02195:ParB-like nuclease domain	ParBc
ENSOARG00000016127	4474	5695	4860	4780	4241	3613	263.66	301.489	242.009	219.825	204.025	213.388	5009.67	4211.33	0.34055	0.0190084	0.555674	4575.9	CTSZ	13	56692920	56701603	+	906	protein_coding	PF00112:Papain family cysteine protease	Peptidase_C1
ENSOARG00000005300	1035	1120	1045	1016	835	751	37.618	36.568	32.0936	28.817	24.7747	27.3557	1066.67	867.333	0.392041	0.0190297	0.555674	961.701	LAMTOR2	1	104659323	104663015	+	1469	protein_coding	PF03259:Roadblock/LC7 domain	-
ENSOARG00000001593	0	0	0	4	5	11	0	0	0	0.182744	0.238956	0.645399	0	6.66667	-5.17234	0.0190346	NA	3.40061	-	12	48880303	48883660	+	912	protein_coding	-	-
ENSOARG00000005312	77	76	72	141	216	92	2.03726	1.80633	1.60966	2.91122	4.66526	2.43948	75	149.667	-0.880988	0.0190493	0.555674	109.181	ZNF461	14	46051699	46072267	+	2018	protein_coding	PF01352:KRAB box|PF00096:Zinc finger, C2H2 type	KRAB
ENSOARG00000009042	5005	8906	6865	8640	14484	8775	53.0739	84.8376	61.5127	71.4975	125.381	93.2562	6925.33	10633	-0.541188	0.0190676	0.555674	8620.14	-	20	26924091	26931702	+	5035	protein_coding	PF07654:Immunoglobulin C1-set domain|PF00129:Class I Histocompatibility antigen, domains alpha 1 and 2	MHC_I
ENSOARG00000024681	7	11	10	1	1	0	3.49294	4.93077	4.21638	0.389397	0.407342	0	9.33333	0.666667	3.92773	0.0190955	0.555674	5.02767	RF00026	5	41887485	41887591	-	107	snRNA	-	-
ENSOARG00000010049	3047	3498	3224	3201	2525	2410	271.143	279.624	242.419	222.286	183.423	214.93	3256.33	2712	0.353477	0.0193514	0.561254	2966.18	-	22	17865701	17870251	+	600	protein_coding	PF00300:Histidine phosphatase superfamily (branch 1)	-
ENSOARG00000013238	0	16	10	0	0	0	0	0.467646	0.274925	0	0	0	8.66667	0	5.58839	0.0193632	NA	4.26289	SLC39A8	6	22554766	22635293	+	1641	protein_coding	PF02535:ZIP Zinc transporter	-
ENSOARG00000004779	758	745	761	954	1593	936	40.88	36.0933	34.6795	40.1504	70.1332	50.5907	754.667	1161	-0.527779	0.0194625	0.563311	943.481	HSD17B11	6	101704087	101893341	-	990	protein_coding	PF00106:short chain dehydrogenase	adh_short
ENSOARG00000006374	1112	2386	2528	2979	3166	3091	84.9385	163.719	163.164	177.57	197.414	236.62	2008.67	3078.67	-0.569912	0.0194889	0.563311	2501.63	-	JH921857.1	2852	8774	+	699	protein_coding	PF07654:Immunoglobulin C1-set domain	C1-set
ENSOARG00000006638	129	235	246	381	404	238	2.63186	4.30695	4.24087	6.06594	6.72854	4.86635	203.333	341	-0.659381	0.0195942	0.564558	263.986	PTH1R	19	52520610	52546346	-	2617	protein_coding	PF02793:Hormone receptor domain|PF00002:7 transmembrane receptor (Secretin family)	7tm_2
ENSOARG00000016390	1141	2217	1150	1923	3026	2433	26.0343	45.4418	22.172	34.2405	56.3633	55.6361	1502.67	2460.67	-0.643066	0.0196394	0.564931	1962.77	SLC40A1	2	118635488	118658474	+	2340	protein_coding	PF06963:Ferroportin1 (FPN1)	-
ENSOARG00000013150	7140	10871	10299	13766	12708	12094	173.124	236.787	211.009	260.476	251.538	293.889	9436.67	12856	-0.376233	0.0196723	0.564949	10986.6	AES	5	18290072	18297728	+	2202	protein_coding	PF03920:Groucho/TLE N-terminal Q-rich domain	-
ENSOARG00000016181	521	1165	1034	1619	1205	1459	8.59353	17.2619	14.4112	20.8392	16.2251	24.1181	906.667	1427.67	-0.602603	0.0197959	0.565561	1148.33	ITGA5	3	132008455	132021989	+	3237	protein_coding	PF08441:Integrin alpha|PF01839:FG-GAP repeat	FG-GAP
ENSOARG00000001881	134	153	127	67	81	94	15.094	15.4817	12.0878	5.88943	7.44818	10.6116	138	80.6667	0.837313	0.0199321	0.565599	110.386	-	7	83868909	83877586	-	474	protein_coding	PF03694:Erg28 like protein	-
ENSOARG00000014606	282	204	176	139	184	95	5.62022	3.65227	2.9639	2.16182	2.99356	1.8975	220.667	139.333	0.790715	0.0199402	0.565599	180.676	TRPV4	17	63068250	63091201	+	2679	protein_coding	PF00520:Ion transport protein	Ion_trans
ENSOARG00000011437	3063	3918	3747	4513	5561	4557	123.613	142.04	127.775	142.129	183.205	184.31	3576	4877	-0.373465	0.0199621	0.565599	4177.8	TBC1D10C	21	44582821	44588010	+	1323	protein_coding	PF00566:Rab-GTPase-TBC domain	TBC
ENSOARG00000020190	7	32	44	45	55	147	0.293824	1.20661	1.56059	1.47402	1.8846	6.18387	27.6667	82.3333	-1.6296	0.0200178	0.565599	56.029	-	2	220355829	220372661	+	1272	protein_coding	PF07679:Immunoglobulin I-set domain|PF16650:Unstructured region on SPEG complex protein	I-set
ENSOARG00000004913	592	649	509	814	847	1031	7.06169	6.95441	5.1304	7.57724	8.24777	12.3253	583.333	897.333	-0.555673	0.0201457	0.567862	740.118	CAMSAP1	3	3394620	3438071	+	4476	protein_coding	PF11971:CAMSAP CH domain|PF08683:Microtubule-binding calmodulin-regulated spectrin-associated	-
ENSOARG00000001140	3404	5860	10664	5752	4682	2638	38.6777	59.8133	102.385	51.0024	43.4279	30.04	6642.67	4357.33	0.690234	0.0201627	0.567862	5347.8	-	4	112262485	112438114	-	4699	protein_coding	PF04548:AIG1 family	-
ENSOARG00000005167	3874	5499	5566	5303	3284	3071	626.791	799.236	760.944	669.552	433.743	497.962	4979.67	3886	0.449285	0.020245	0.568812	4371.74	TYROBP	14	45713678	45716324	-	330	protein_coding	-	-
ENSOARG00000002593	8718	5511	7471	6871	5633	4313	242.686	137.812	175.733	149.262	128.007	120.326	7233.33	5605.67	0.483427	0.0203876	0.570592	6396.73	SPTLC2	7	85642041	85736820	-	1918	protein_coding	PF00155:Aminotransferase class I and II	Aminotran_1_2
ENSOARG00000010733	23	31	11	75	40	67	0.148545	0.179854	0.06003	0.377999	0.21089	0.433668	21.6667	60.6667	-1.39892	0.0204978	0.570592	40.7804	MAGI1	19	35638398	36053488	+	8267	protein_coding	PF16663:Unstructured region on MAGI|PF16666:Unstructured region on MAGI|PF00595:PDZ domain (Also known as DHR or GLGF)|PF00625:Guanylate kinase|PF00397:WW domain	PDZ
ENSOARG00000007814	16452	15438	15036	14748	14476	10443	160.704	135.465	124.104	112.419	115.431	102.232	15642	13222.3	0.347736	0.020543	0.570592	14341.4	SYK	2	25701083	25759453	+	5466	protein_coding	PF00017:SH2 domain|PF07714:Protein tyrosine kinase	Pkinase_Tyr
ENSOARG00000011856	519	599	667	561	307	407	57.0175	59.1148	61.9174	48.0954	27.5325	44.8114	595	425	0.564336	0.0205622	0.570592	507.246	ALOX5AP	10	30365435	30388526	-	486	protein_coding	PF01124:MAPEG family	-
ENSOARG00000009841	80	109	153	190	189	217	2.50962	3.07165	4.0556	4.65126	4.84	6.82229	114	198.667	-0.755107	0.0205642	0.570592	154.439	ACVR2A	2	160457581	160548685	-	1702	protein_coding	PF00069:Protein kinase domain	Pkinase
ENSOARG00000015916	410	305	478	331	317	212	9.35502	6.25157	9.21585	5.89371	5.90455	4.84786	397.667	286.667	0.57449	0.0206227	0.570592	339.326	CEP83	3	130427975	130675880	-	2340	protein_coding	-	-
ENSOARG00000009068	1590	1883	1406	2443	2608	1908	101.426	107.902	75.785	121.612	135.808	121.978	1626.33	2319.67	-0.413095	0.0206332	0.570592	1944.92	RSU1	13	30138854	30346333	-	837	protein_coding	PF13855:Leucine rich repeat	-
ENSOARG00000004219	332	371	417	378	245	171	2.80566	2.81643	2.97769	2.49281	1.69017	1.44826	373.333	264.667	0.607937	0.0206715	0.570592	314.434	PPM1H	3	156511682	156807677	+	6318	protein_coding	PF00481:Protein phosphatase 2C	PP2C
ENSOARG00000014966	6	12	14	37	40	26	0.808971	1.45342	1.59498	3.89299	4.40259	3.51325	10.6667	34.3333	-1.60886	0.020739	0.570592	21.6987	INSL3	5	5056451	5057662	+	396	protein_coding	PF00049:Insulin/IGF/Relaxin family	-
ENSOARG00000005446	3703	1927	1842	1785	1043	548	39.3768	18.4076	16.5509	14.8124	9.05393	5.8401	2490.67	1125.33	1.32133	0.0208719	0.570592	1826.3	NAIP	16	10126997	10169077	-	5021	protein_coding	PF05729:NACHT domain|PF00653:Inhibitor of Apoptosis domain	NACHT
ENSOARG00000009630	3574	3860	4439	5386	5219	5226	60.064	58.2741	63.0364	70.636	71.6001	88.0202	3957.67	5277	-0.344202	0.020883	0.570592	4572.72	MLLT6	11	38885178	38902405	+	3177	protein_coding	PF13832:PHD-zinc-finger like domain	-
ENSOARG00000008809	199	187	183	411	269	253	9.10456	7.68557	7.07463	14.674	10.0467	11.6006	189.667	311	-0.608249	0.0209007	0.570592	245.612	CADM4	14	50917816	50922042	-	1167	protein_coding	PF07686:Immunoglobulin V-set domain|PF13927:Immunoglobulin domain|PF08205:CD80-like C2-set immunoglobulin domain	V-set
ENSOARG00000018284	2	27	12	0	3	0	0.0593245	0.719443	0.300768	0	0.0726427	0	13.6667	1	3.8627	0.0209129	0.570592	7.25428	ARSJ	6	11682791	11756351	+	1800	protein_coding	PF00884:Sulfatase	Sulfatase
ENSOARG00000008934	514	1067	1227	1649	1515	1200	11.8598	22.116	23.9224	29.6916	28.536	27.7491	936	1454.67	-0.569868	0.0209383	0.570592	1164.38	TSPAN13	4	25327414	25366517	+	2314	protein_coding	PF00335:Tetraspanin family	Tetraspannin
ENSOARG00000018955	749	1361	1085	1001	782	601	15.1652	24.7545	18.5628	15.8162	12.9253	12.1954	1065	794.667	0.513942	0.02094	0.570592	916.837	NFAM1	3	217337775	217357325	-	2637	protein_coding	-	-
ENSOARG00000017799	482	909	558	848	950	1488	8.33656	14.1232	8.15495	11.4455	13.4131	25.7927	649.667	1095.33	-0.725094	0.0209436	0.570592	876.975	KANK2	5	13265620	13288133	-	3087	protein_coding	PF12796:Ankyrin repeats (3 copies)|PF12075:KN motif	-
ENSOARG00000014775	54	14	86	15	26	10	12.6455	2.94509	17.0172	2.74115	4.97029	2.3469	51.3333	17	1.69262	0.0210671	0.572079	34.0201	CXCL1	6	88610487	88611559	+	228	protein_coding	-	-
ENSOARG00000000817	0	1	0	3	6	16	0	0.0269152	0	0.070144	0.146753	0.480444	0.333333	8.33333	-4.5606	0.0210942	NA	4.50873	CALY	22	50770144	50780823	+	1782	protein_coding	PF06387:D1 dopamine receptor-interacting protein (calcyon)	Calcyon
ENSOARG00000021767	6	6	22	18	52	52	0.849741	0.763335	2.63272	1.98934	6.01181	7.38061	11.3333	40.6667	-1.84466	0.0211619	0.572079	25.8705	RF01877	17	66013458	66013834	+	377	misc_RNA	-	-
ENSOARG00000002623	2	15	8	1	0	0	0.0679288	0.457661	0.229594	0.0265048	0	0	8.33333	0.333333	4.58883	0.0212202	NA	4.29801	-	AMGL01128756.1	3316	9698	+	1572	protein_coding	-	-
ENSOARG00000026870	0	0	0	0	0	33	0	0	0	0	0	0.706607	0	11	-6.03069	0.0212259	0.572079	6.16239	-	20	28077664	28085359	-	2499	lincRNA	-	-
ENSOARG00000008757	328	497	476	659	654	576	38.4048	52.2753	47.094	60.214	62.511	67.5909	433.667	629.667	-0.465117	0.0212333	0.572079	523.171	-	2	33364425	33376119	+	456	protein_coding	PF01521:Iron-sulphur cluster biosynthesis	-
ENSOARG00000019670	103	93	91	69	40	51	2.8509	2.31236	2.1283	1.49037	0.903797	1.41471	95.6667	53.3333	0.936471	0.0212804	0.572079	74.8642	CTTNBP2NL	1	88988258	89021148	+	1929	protein_coding	PF09727:Cortactin-binding protein-2	-
ENSOARG00000005810	971	1243	905	1067	643	618	28.7541	33.0659	22.6452	24.6573	15.5438	18.341	1039.67	776	0.527688	0.0212921	0.572079	901.595	PRCP	21	12227075	12312706	+	1803	protein_coding	PF05577:Serine carboxypeptidase S28	Peptidase_S28
ENSOARG00000009779	7329	15642	14361	12915	5591	6769	501.68	961.841	830.641	689.885	312.42	464.366	12444	8425	0.645226	0.0214165	0.57454	10259.1	CFD	5	40807088	40809220	+	780	protein_coding	PF00089:Trypsin	Trypsin
ENSOARG00000018920	1394	1516	1549	2013	2073	1912	15.4288	15.0729	14.4866	17.3865	18.7299	21.2085	1486.33	1999.33	-0.349598	0.0215548	0.577365	1725.8	LMBR1L	3	136944764	136957292	+	4824	protein_coding	PF04791:LMBR1-like membrane protein	-
ENSOARG00000004738	33	63	192	33	36	42	0.884507	1.5169	4.34846	0.690242	0.787692	1.12821	96	37	1.37983	0.0216235	0.578322	65.1924	-	5	15142427	15181236	-	1992	protein_coding	PF01825:GPCR proteolysis site, GPS, motif|PF00002:7 transmembrane receptor (Secretin family)|PF07645:Calcium-binding EGF domain	7tm_2
ENSOARG00000003661	15	38	11	94	61	36	0.482749	1.09861	0.299137	2.3608	1.60261	1.16114	21.3333	63.6667	-1.45013	0.021785	0.58024	40.6504	TOX2	13	72008972	72131394	+	1659	protein_coding	PF00505:HMG (high mobility group) box	HMG_box
ENSOARG00000020833	1281	1295	1123	1270	967	619	20.5576	18.6691	15.2283	15.9048	12.6683	9.95562	1233	952	0.497033	0.0218012	0.58024	1081.78	MYO1E	7	47972957	48187190	+	3327	protein_coding	PF00018:SH3 domain|PF06017:Unconventional myosin tail, actin- and lipid-binding|PF00063:Myosin head (motor domain)	Myosin_head
ENSOARG00000007846	359	574	483	674	804	618	18.3952	26.421	20.9124	26.9506	33.6304	31.7359	472	698.667	-0.489628	0.0218683	0.58024	575.89	C4orf47	26	14415172	14426036	+	1042	protein_coding	PF15239:Domain of unknown function (DUF4586)	-
ENSOARG00000000625	263	344	273	301	126	133	7.26817	8.53998	6.37498	6.49137	2.84254	3.68362	293.333	186.667	0.766451	0.0218917	0.58024	237.813	-	JH921595.1	8032	10487	+	1932	protein_coding	PF13895:Immunoglobulin domain	-
ENSOARG00000009826	781	931	940	874	713	571	23.0893	24.7251	23.4819	20.1637	17.2074	16.918	884	719.333	0.39213	0.021901	0.58024	793.124	PGM1	1	38621085	38687692	+	1806	protein_coding	PF02880:Phosphoglucomutase/phosphomannomutase, alpha/beta/alpha domain III|PF02878:Phosphoglucomutase/phosphomannomutase, alpha/beta/alpha domain I|PF00408:Phosphoglucomutase/phosphomannomutase, C-terminal domain|PF02879:Phosphoglucomutase/phosphomannomutase, alpha/beta/alpha domain II	PGM_PMM_III
ENSOARG00000001991	400	427	442	343	324	307	18.9838	18.2046	17.7253	12.7034	12.5527	14.6021	423	324.667	0.462875	0.0219063	0.58024	372.797	SNUPN	18	32173543	32187847	+	1125	protein_coding	PF11538:Snurportin1	-
ENSOARG00000016430	13	4	8	134	10	7	0.0895493	0.0247518	0.0465646	0.720317	0.0562323	0.0483249	8.33333	50.3333	-2.36963	0.0219299	0.58024	26.7389	ACACB	17	63507291	63604351	-	7751	protein_coding	PF01039:Carboxyl transferase domain|PF02785:Biotin carboxylase C-terminal domain|PF00364:Biotin-requiring enzyme|PF08326:Acetyl-CoA carboxylase, central region|PF02786:Carbamoyl-phosphate synthase L chain, ATP binding domain|PF00289:Biotin carboxylase, N-terminal domain	Carboxyl_trans
ENSOARG00000016422	359	351	433	367	287	167	7.40353	6.5025	7.54535	5.90624	4.83162	3.45155	381	273.667	0.592915	0.0219665	0.58024	322.697	EVI5	1	68957918	69125478	-	2589	protein_coding	PF00566:Rab-GTPase-TBC domain	TBC
ENSOARG00000001910	12	52	37	150	78	47	1.99597	7.76969	5.2002	19.4699	10.5909	7.83471	33.6667	91.6667	-1.3394	0.0220223	0.58024	59.3631	-	25	42998614	43009627	-	321	protein_coding	PF14986:Domain of unknown function (DUF4514)	-
ENSOARG00000000878	34	72	31	92	157	71	0.652762	1.24176	0.502903	1.37836	2.46061	1.36612	45.6667	106.667	-1.12032	0.0220265	0.58024	73.9464	KIFC3	14	25150173	25179758	-	2781	protein_coding	PF00225:Kinesin motor domain	Kinesin
ENSOARG00000015832	240	280	212	349	331	596	13.1832	13.8165	9.83995	14.9602	14.8424	32.8103	244	425.333	-0.763524	0.0221226	0.581722	337.901	-	3	49440109	49441080	+	972	protein_coding	PF08557:Sphingolipid Delta4-desaturase (DES)|PF00487:Fatty acid desaturase	-
ENSOARG00000012323	5819	6128	5968	8291	8491	6758	144.843	137.024	125.523	161.048	172.534	168.586	5971.67	7846.67	-0.302303	0.0221576	0.581722	6822.24	ACAP1	11	26670345	26681951	+	2145	protein_coding	PF00169:PH domain|PF12796:Ankyrin repeats (3 copies)|PF16746:BAR domain of APPL family|PF01412:Putative GTPase activating protein for Arf	PH
ENSOARG00000013602	59	7	5	9	1	0	0.75308	0.080263	0.0539269	0.0896461	0.0104197	0	23.6667	3.33333	3.1122	0.0221823	0.581722	14.4278	VWA3B	3	102812148	102992724	-	4183	protein_coding	PF15057:Domain of unknown function (DUF4537)|PF13768:von Willebrand factor type A domain	-
ENSOARG00000010051	302	247	173	145	194	125	21.4136	15.7328	10.3651	8.02324	11.2292	8.88271	240.667	154.667	0.753274	0.0224142	0.58571	199.145	-	1	111007547	111011120	+	753	protein_coding	PF13895:Immunoglobulin domain	-
ENSOARG00000016228	1151	1788	1348	1133	950	1123	23.9122	33.3687	23.6636	18.3685	16.1114	23.3817	1429	1068.67	0.484956	0.0224609	0.58571	1247.3	NFE2	3	132107083	132114766	+	2570	protein_coding	PF03131:bZIP Maf transcription factor	bZIP_Maf
ENSOARG00000011967	223	183	314	368	364	429	12.3255	9.08614	14.6648	15.8726	16.4236	23.7635	240	387	-0.634012	0.0224707	0.58571	311.194	DBP	14	54318156	54323546	-	966	protein_coding	PF07716:Basic region leucine zipper	bZIP_2
ENSOARG00000007352	236	201	377	226	196	73	1.86757	1.42886	2.52089	1.39564	1.26616	0.578952	271.333	165	0.840114	0.0225435	0.58571	213.757	BAZ2B	2	149099599	149271953	+	6747	protein_coding	PF00439:Bromodomain|PF01429:Methyl-CpG binding domain|PF02791:DDT domain|PF00628:PHD-finger|PF15613:Williams-Beuren syndrome DDT (WSD), D-TOX E motif	Bromodomain
ENSOARG00000006265	546	499	688	523	411	395	13.738	11.2787	14.6274	10.2691	8.44189	9.96052	577.667	443	0.467416	0.0225577	0.58571	506.909	AGPAT5	26	5522863	5555418	+	2122	protein_coding	PF01553:Acyltransferase|PF16076:Acyltransferase C-terminus	Acyltransferase
ENSOARG00000001123	460	566	622	451	435	400	28.5254	31.5296	32.592	21.8248	22.0206	24.8592	549.333	428.667	0.432386	0.022662	0.586401	485.783	ALKBH3	15	72164703	72205335	+	861	protein_coding	PF13532:2OG-Fe(II) oxygenase superfamily	-
ENSOARG00000018066	3158	5628	4511	7331	5858	5803	62.1039	99.4236	74.9595	112.505	94.0422	114.37	4432.33	6330.67	-0.440493	0.0227469	0.58773	5292.06	QSOX1	12	59415011	59456443	+	2715	protein_coding	PF04777:Erv1 / Alr family|PF00085:Thioredoxin	Evr1_Alr
ENSOARG00000014133	1	0	0	12	3	10	0.0100949	0	0	0.0945332	0.0247224	0.101171	0.333333	8.33333	-4.47486	0.0227873	NA	4.26215	ADAMTSL1	2	86407235	86900674	+	5289	protein_coding	PF07679:Immunoglobulin I-set domain|PF00090:Thrombospondin type 1 domain|PF08686:PLAC (protease and lacunin) domain|PF13927:Immunoglobulin domain	I-set
ENSOARG00000002881	734	287	359	384	296	170	8.45883	2.97115	3.49587	3.45339	2.78466	1.96344	460	283.333	0.8602	0.0227945	0.588092	374.595	-	JH922747.1	21	10196	+	4633	protein_coding	PF10421:2'-5'-oligoadenylate synthetase 1, domain 2, C-terminus	-
ENSOARG00000021426	16	5	46	6	5	0	4.47263	1.25557	10.8655	1.30886	1.14098	0	22.3333	3.66667	2.73279	0.0229053	0.589606	12.7246	RF00004	11	42719026	42719216	+	191	snRNA	-	-
ENSOARG00000018487	1260	3170	2525	3703	6289	2204	59.3245	134.076	100.455	136.056	241.72	103.999	2318.33	4065.33	-0.713867	0.0229205	0.589606	3076.76	CTSW	21	43302588	43305776	+	1134	protein_coding	PF00112:Papain family cysteine protease|PF08246:Cathepsin propeptide inhibitor domain (I29)	Peptidase_C1
ENSOARG00000001299	997	1135	1406	1541	2089	1385	82.148	84.0091	97.889	99.0842	140.51	114.368	1179.33	1671.67	-0.422918	0.0229648	0.589878	1400.48	PDCD10	1	217764335	217793993	+	648	protein_coding	PF06840:Protein of unknown function (DUF1241)	-
ENSOARG00000014043	11	14	9	0	3	0	0.391542	0.447654	0.270692	0	0.0871712	0	11.3333	1	3.6342	0.0231114	0.590722	6.27786	CYP8B1	19	14859385	14860884	-	1500	protein_coding	PF00067:Cytochrome P450	p450
ENSOARG00000018091	1134	817	1090	999	683	632	22.041	14.2649	17.9016	15.1525	10.8369	12.3109	1013.67	771.333	0.499884	0.0231253	0.590722	888.548	LPCAT2	14	23274854	23341508	+	2747	protein_coding	PF01553:Acyltransferase|PF00036:EF hand	Acyltransferase
ENSOARG00000009428	628	767	796	460	624	553	25.2297	27.6806	27.0216	14.4215	20.4646	22.2654	730.333	545.667	0.485225	0.0231506	0.590722	637.017	NDUFAF7	3	86766525	86780060	-	1329	protein_coding	PF02636:Putative S-adenosyl-L-methionine-dependent methyltransferase	-
ENSOARG00000020761	385	1018	920	1339	1303	1086	5.0593	12.0173	10.2156	13.7313	13.9779	14.3025	774.333	1242.67	-0.621592	0.0231662	0.590722	984.771	TNIK	1	214087639	214487796	+	4063	protein_coding	PF00069:Protein kinase domain|PF00780:CNH domain	Pkinase
ENSOARG00000006845	162	101	187	107	107	30	5.75483	3.22306	5.61314	2.96621	3.1029	1.06805	150	81.3333	1.02491	0.0232198	0.591141	114.212	FCRL4	1	106504646	106537291	-	1503	protein_coding	PF13927:Immunoglobulin domain|PF13895:Immunoglobulin domain	-
ENSOARG00000008157	20	51	36	45	161	71	0.900372	2.06249	1.36943	1.5809	5.91677	3.20335	35.6667	92.3333	-1.30269	0.0232671	0.591141	62.3581	CABLES1	23	33601173	33702730	-	1186	protein_coding	PF00134:Cyclin, N-terminal domain	-
ENSOARG00000017017	24	11	17	42	49	53	5.20898	2.14468	3.11772	7.11363	8.68169	11.5285	17.3333	48	-1.38722	0.0232839	0.591141	32.505	-	X	112732368	112732709	+	246	protein_coding	-	-
ENSOARG00000004521	876	864	875	1266	1155	1267	16.1559	14.3143	13.6359	18.2206	17.3891	23.4185	871.667	1229.33	-0.420298	0.0233235	0.591288	1043.93	PEX6	20	16672104	16684975	-	2895	protein_coding	PF00004:ATPase family associated with various cellular activities (AAA)	AAA
ENSOARG00000021166	734	934	949	776	701	645	36.9366	42.2218	40.3529	30.4736	28.7969	32.5293	872.333	707.333	0.381009	0.0235498	0.594446	783.979	EIF2S1	7	76140063	76155742	+	1061	protein_coding	PF00575:S1 RNA binding domain|PF07541:Eukaryotic translation initiation factor 2 alpha subunit	S1
ENSOARG00000009949	616	795	673	747	426	357	18.7833	21.7764	17.3401	17.7751	10.6039	10.9097	694.667	510	0.557583	0.0237177	0.597822	595.104	SKAP2	4	69124422	69290438	+	1751	protein_coding	PF00018:SH3 domain|PF00169:PH domain	PH
ENSOARG00000012017	55	98	48	85	256	115	2.40505	3.8496	1.77357	2.90055	9.13835	5.03979	67	152	-1.09014	0.0239569	0.602985	107.209	GATA1	X	53001682	53004546	-	1221	protein_coding	PF00320:GATA zinc finger	GATA
ENSOARG00000007249	22	34	38	84	78	48	1.3409	1.86157	1.95705	3.99532	3.88091	2.93202	31.3333	70	-1.06638	0.024186	0.606544	48.9248	TMEM38B	2	17246880	17308012	-	876	protein_coding	PF05197:TRIC channel	-
ENSOARG00000006700	81	81	150	61	73	39	14.7101	13.2143	23.018	8.64489	10.8223	7.09819	104	57.6667	0.937575	0.0242164	0.606544	79.6963	-	11	54085290	54098581	+	294	protein_coding	-	-
ENSOARG00000002535	5	21	33	48	61	59	0.131056	0.494463	0.730881	0.981809	1.30522	1.54986	19.6667	56	-1.48925	0.0242368	0.606544	36.9941	SLC34A3	3	1808994	1814527	+	2037	protein_coding	PF02690:Na+/Pi-cotransporter	Na_Pi_cotrans
ENSOARG00000013157	1809	5722	3600	5408	7506	5473	76.9612	218.68	129.414	179.544	260.68	233.352	3710.33	6129	-0.664119	0.0244758	0.608896	4821.79	TIMP1	X	53830533	53834499	-	1255	protein_coding	PF00965:Tissue inhibitor of metalloproteinase	-
ENSOARG00000001605	17	8	67	2	5	11	0.81114	0.342898	2.70127	0.0744692	0.194753	0.526009	30.6667	6	2.30378	0.0245586	0.608896	18.2015	-	19	51536698	51547252	-	1119	protein_coding	PF00666:Cathelicidin	-
ENSOARG00000020196	10	61	17	131	81	50	0.750943	4.11496	1.07871	7.67677	4.96545	3.76297	29.3333	87.3333	-1.46463	0.0245741	0.608896	55.5872	-	1	92649314	92650026	-	711	pseudogene	PF01092:Ribosomal protein S6e	-
ENSOARG00000009726	1418	1321	1664	2182	2015	1728	25.9192	21.6909	25.7007	31.1243	30.0668	31.655	1467.67	1975	-0.341213	0.0246434	0.609751	1697.17	TRIM35	2	38292376	38315573	+	2921	protein_coding	PF00622:SPRY domain|PF13765:SPRY-associated domain|PF00643:B-box zinc finger|PF13920:Zinc finger, C3HC4 type (RING finger)	SPRY
ENSOARG00000008374	1753	1090	2008	1356	1435	780	72.7244	40.6213	70.3896	43.8993	48.5978	32.43	1617	1190.33	0.555193	0.0246839	0.609757	1389.18	GCNT1	2	59764793	59766079	-	1287	protein_coding	PF02485:Core-2/I-Branching enzyme	-
ENSOARG00000006275	0	2	0	6	10	15	0	0.456789	0	1.19044	2.07551	3.8221	0.666667	10.3333	-3.93931	0.0247133	0.609757	5.53772	GNGT2	11	36901329	36901999	+	210	protein_coding	-	-
ENSOARG00000001915	66	84	20	86	298	87	1.04784	1.198	0.268304	1.06549	3.86218	1.38428	56.6667	157	-1.33227	0.0247732	0.610376	103.815	-	9	14611676	14636151	+	3363	protein_coding	-	-
ENSOARG00000005722	350	475	555	1011	453	797	4.53024	5.523	6.07005	10.2118	4.78649	10.3387	460	753.667	-0.651154	0.0248496	0.611398	598.008	EPAS1	3	77880264	77921519	-	4125	protein_coding	PF11413:Hypoxia-inducible factor-1|PF08778:HIF-1 alpha C terminal transactivation domain|PF08447:PAS fold	-
ENSOARG00000016503	24	64	91	89	323	64	1.97748	4.73708	6.33563	5.72258	21.7255	5.28488	59.6667	158.667	-1.32556	0.0249473	0.612942	103.802	TRBV29-1	4	105520879	105521786	+	648	protein_coding	PF07686:Immunoglobulin V-set domain	V-set
ENSOARG00000004774	12085	16450	16940	16066	8009	10182	1748.63	2138.18	2071.15	1814.09	946.009	1476.51	15158.3	11419	0.491682	0.0251123	0.613187	13154.5	-	11	14045854	14050177	+	369	protein_coding	PF00048:Small cytokines (intecrine/chemokine), interleukin-8 like	-
ENSOARG00000006629	33	7	6	5	0	1	0.852413	0.162429	0.130959	0.100787	0	0.0258875	15.3333	2	3.14947	0.0251222	0.613187	9.18954	NPAS3	18	43064631	43193191	+	2067	protein_coding	PF08447:PAS fold	-
ENSOARG00000005754	0	3	0	25	8	7	0	0.0644952	0	0.466893	0.156291	0.167892	1	13.3333	-3.61063	0.0251713	0.613187	6.67809	MEOX1	11	42968473	42986641	-	2231	protein_coding	PF00046:Homeobox domain	Homeobox
ENSOARG00000002231	3368	379	120	382	77	43	369.249	37.3264	11.1167	32.6822	6.89136	4.72465	1289	167.333	3.23346	0.0251927	0.613187	785.874	-	6	97556997	97570005	-	487	protein_coding	PF04749:PLAC8 family	-
ENSOARG00000017682	260	298	267	463	338	502	7.46341	7.68438	6.47622	10.3716	7.9204	14.4418	275	434.333	-0.596948	0.0252154	0.613187	353.48	RTL5	X	61316680	61320555	-	1860	protein_coding	PF16297:Domain of unknown function (DUF4939)	-
ENSOARG00000000604	5	1	5	9	11	42	1.4588	0.262092	1.23266	2.04912	2.6199	12.2809	3.66667	20.6667	-2.51682	0.0252373	0.613187	12.724	-	1	10956519	10956701	-	183	protein_coding	-	-
ENSOARG00000015139	1855	2457	3345	4128	3500	3067	42.2175	50.2322	64.3267	73.3143	65.0254	69.9546	2552.33	3565	-0.40978	0.0252707	0.613187	2995.18	ABLIM1	22	33874564	34112699	-	2346	protein_coding	PF16182:Putative adherens-junction anchoring region of AbLIM|PF02209:Villin headpiece domain|PF00412:LIM domain	LIM
ENSOARG00000007229	171908	127423	122949	131346	118814	88050	7301.93	4862.03	4412.79	4353.7	4119.79	3748.21	140760	112737	0.438828	0.0252724	0.613187	126569	CD74	5	59256119	59263326	-	1257	protein_coding	PF00086:Thyroglobulin type-1 repeat|PF08831:Class II MHC-associated invariant chain trimerisation domain|PF09307:CLIP, MHC2 interacting	-
ENSOARG00000012901	10729	11313	11563	11042	9494	8669	994.52	942.021	905.673	798.734	718.406	805.335	11201.7	9735	0.290945	0.0253257	0.613631	10402.1	CYBA	14	13409732	13416776	-	576	protein_coding	PF05038:Cytochrome Cytochrome b558 alpha-subunit	-
ENSOARG00000011198	822	576	913	516	637	546	27.0915	17.0535	25.4261	13.2712	17.1383	18.0347	770.333	566.333	0.522345	0.0253912	0.614369	668.472	-	24	211639	218445	+	1620	protein_coding	-	-
ENSOARG00000017997	44	100	138	189	91	338	1.63939	3.34703	4.34467	5.49531	2.76782	12.6212	94	206	-1.15679	0.0254426	0.614763	151.345	FAM131B	4	106177257	106181977	-	1433	protein_coding	PF15010:Putative cell signalling	-
ENSOARG00000020968	1519	4479	3490	5061	5643	4414	45.2077	119.747	87.766	117.541	137.098	131.656	3162.67	5039.33	-0.611996	0.0255212	0.61534	4009.22	LCK	2	234367380	234375219	-	1794	protein_coding	PF00018:SH3 domain|PF00017:SH2 domain|PF07714:Protein tyrosine kinase	Pkinase_Tyr
ENSOARG00000008163	3530	2679	3447	2386	3159	2102	93.9083	64.0222	77.485	49.5336	68.6034	56.0423	3218.67	2549	0.433897	0.0255367	0.61534	2874.41	POU2F2	14	50190305	50212427	+	2007	protein_coding	PF00046:Homeobox domain|PF00157:Pou domain - N-terminal to homeobox domain	Pou
ENSOARG00000014509	201	35	98	37	34	64	1.93053	0.301979	0.79534	0.27732	0.266579	0.616047	111.333	45	1.38718	0.0257236	0.617916	81.3547	MGAM	4	104976784	105059969	+	5559	protein_coding	PF00088:Trefoil (P-type) domain|PF01055:Glycosyl hydrolases family 31|PF16863:N-terminal barrel of NtMGAM and CtMGAM, maltase-glucoamylase	Glyco_hydro_31
ENSOARG00000008360	6	6	8	51	13	19	0.290174	0.260668	0.326922	1.92477	0.513237	0.920905	6.66667	27.6667	-1.93825	0.0257464	0.617916	16.36	-	10	18767778	18769088	+	1104	protein_coding	PF00001:7 transmembrane receptor (rhodopsin family)	7tm_1
ENSOARG00000012626	1296	1180	2137	1305	1375	745	11.6669	9.54244	16.2555	9.16768	10.1046	6.72138	1537.67	1141.67	0.526493	0.0257495	0.617916	1316.32	TRIP11	18	55613682	55678735	-	5931	protein_coding	-	-
ENSOARG00000006257	3	0	8	27	17	20	0.0422406	0	0.0951799	0.296669	0.1954	0.282223	3.66667	21.3333	-2.48402	0.0258289	0.618285	12.0904	MYBPC3	15	75411873	75428798	-	3792	protein_coding	PF00041:Fibronectin type III domain|PF07679:Immunoglobulin I-set domain	I-set
ENSOARG00000000853	113	212	206	396	253	242	1.06389	1.79301	1.63882	2.90946	1.94448	2.28342	177	297	-0.665965	0.0258354	0.618285	230.722	DLEC1	19	11431733	11518468	+	5671	protein_coding	-	-
ENSOARG00000006399	6	0	18	0	0	0	0.0948349	0	0.240401	0	0	0	8	0	5.48195	0.0259391	NA	3.96136	DSG2	23	25896411	25927113	-	3378	protein_coding	PF00028:Cadherin domain	Cadherin
ENSOARG00000026272	76	68	483	101	99	59	2.21133	1.77737	11.875	2.29331	2.35149	1.72047	209	86.3333	1.31818	0.0259665	0.620575	142.714	-	10	8590717	8719711	-	1835	lincRNA	-	-
ENSOARG00000015855	671	811	681	1010	936	1294	12.7631	13.8575	10.9453	14.9919	14.5337	24.6673	721	1080	-0.527842	0.0260256	0.621139	900.466	DEGS1	12	25467996	25473652	+	2807	protein_coding	PF00487:Fatty acid desaturase	-
ENSOARG00000014203	1625	417	316	373	205	185	82.8673	19.1027	13.6164	14.8436	8.53396	9.45487	786	254.333	1.81357	0.0261113	0.621884	543.015	CCRL2	19	52912035	52913081	-	1047	protein_coding	PF00001:7 transmembrane receptor (rhodopsin family)	7tm_1
ENSOARG00000016329	31	117	98	143	175	182	1.90248	6.45018	5.08195	6.84847	8.76722	11.1939	82	166.667	-0.992145	0.0261278	0.621884	122.431	GFI1	1	68925973	68930355	-	870	protein_coding	PF00096:Zinc finger, C2H2 type	zf-C2H2
ENSOARG00000004292	684	1123	984	1148	1333	1803	11.8303	17.4481	14.3808	15.4947	18.8207	31.2528	930.333	1428	-0.58543	0.0261685	0.622008	1178.83	ADAMTS10	5	14844882	14866696	-	3087	protein_coding	PF01421:Reprolysin (M12B) family zinc metalloprotease|PF05986:ADAM-TS Spacer 1|PF08686:PLAC (protease and lacunin) domain|PF01562:Reprolysin family propeptide	-
ENSOARG00000014547	244	303	228	227	185	142	11.8974	13.2719	9.39386	8.63751	7.36378	6.93912	258.333	184.667	0.588841	0.0262354	0.622752	220.176	-	14	56148152	56165133	+	1095	protein_coding	PF07686:Immunoglobulin V-set domain	V-set
ENSOARG00000012535	5331	3825	5173	4273	4478	2708	60.586	39.0503	49.6767	37.8963	41.5446	30.8437	4776.33	3819.67	0.436042	0.0263462	0.624538	4264.66	TNS3	4	74807679	75024991	+	4698	protein_coding	PF00017:SH2 domain|PF08416:Phosphotyrosine-binding domain|PF00130:Phorbol esters/diacylglycerol binding domain (C1 domain)|PF10409:C2 domain of PTEN tumour-suppressor protein	SH2
ENSOARG00000019095	1825	2076	1734	1971	1432	1165	36.2098	37.0015	29.0709	30.5176	23.1938	23.1655	1878.33	1522.67	0.410716	0.0263944	0.624713	1685.85	CSF2RB	3	180166727	180179868	+	2691	protein_coding	PF09240:Interleukin-6 receptor alpha chain, binding	-
ENSOARG00000015694	31	75	37	129	87	91	1.90248	4.13473	1.9187	6.17799	4.35856	5.59696	47.6667	102.333	-1.01924	0.0264249	0.624713	73.2889	-	4	105275670	105276648	+	870	protein_coding	PF07686:Immunoglobulin V-set domain	V-set
ENSOARG00000017954	3061	3384	3539	3531	2851	1757	36.8508	36.5967	36.0007	33.1727	28.0186	21.1987	3328	2713	0.408493	0.0266553	0.628984	2975.37	ACSL4	X	118800402	118845526	+	4435	protein_coding	PF00501:AMP-binding enzyme	AMP-binding
ENSOARG00000025386	11	0	11	54	46	13	1.09166	0	0.922431	4.18204	3.72665	1.29298	7.33333	37.6667	-2.20003	0.0266991	0.628984	21.1123	-	X	94519476	94522584	-	538	lincRNA	-	-
ENSOARG00000016367	729	1462	1055	1466	1838	1571	13.6956	24.6734	16.7476	21.4925	28.188	29.5789	1082	1625	-0.523678	0.0267492	0.628984	1335.42	RASSF1	JH922417.1	2017	9200	+	2842	protein_coding	PF00788:Ras association (RalGDS/AF-6) domain|PF16517:Novel Ras effector 1 C-terminal SARAH (Sav/Rassf/Hpo) domain	RA
ENSOARG00000000328	2	0	1	9	14	10	0.355947	0	0.150384	1.24997	2.034	1.78365	1	11	-3.35162	0.0269185	0.632115	5.84737	TCEAL9	X	121942585	121943538	-	300	protein_coding	PF04538:Brain expressed X-linked like family	-
ENSOARG00000010681	2576	2459	1897	2299	1834	1358	88.8488	76.1891	55.2866	61.8792	51.6383	46.9417	2310.67	1830.33	0.455999	0.0269868	0.632871	2061.06	ATP6V1B2	2	45338025	45361588	-	1548	protein_coding	PF00006:ATP synthase alpha/beta family, nucleotide-binding domain|PF02874:ATP synthase alpha/beta family, beta-barrel domain	ATP-synt_ab
ENSOARG00000006592	193	194	31	29	113	11	6.23392	5.62904	0.846082	0.730974	2.97954	0.356082	139.333	51	1.63749	0.0270336	0.633122	96.9395	-	24	10120906	10142827	-	1653	protein_coding	-	-
ENSOARG00000005018	1615	1478	1992	1368	1718	944	34.395	28.2765	35.8475	22.7357	29.8684	20.1487	1695	1343.33	0.436317	0.0272116	0.635714	1501.56	TCF4	23	54803976	55181403	-	2507	protein_coding	PF00010:Helix-loop-helix DNA-binding domain	HLH
ENSOARG00000003151	0	0	0	9	2	8	0	0	0	0.0846669	0.0196819	0.0966528	0	6.33333	-5.04736	0.0273717	NA	3.11202	FOXI1	16	2062095	2069145	+	4429	protein_coding	PF00250:Forkhead domain	Fork_head
ENSOARG00000024483	845	1310	1317	1860	1842	1219	446.696	622.093	588.285	767.306	794.898	645.822	1157.33	1640.33	-0.41446	0.0274351	0.638573	1365.28	-	11	48097904	48098004	-	101	miRNA	-	-
ENSOARG00000009568	39	119	79	158	159	143	1.34776	3.69423	2.30686	4.26094	4.48551	4.95265	79	153.333	-0.8956	0.0274557	0.638573	113.721	ZMYND10	19	49953412	49957409	+	1545	protein_coding	PF01753:MYND finger	zf-MYND
ENSOARG00000001697	207	194	189	276	403	267	16.9772	14.2931	13.098	17.6646	26.9816	21.9463	196.667	315.333	-0.587297	0.0274678	0.638573	252.593	TMEM86B	14	59502775	59504293	+	651	protein_coding	PF07947:YhhN family	YhhN
ENSOARG00000008181	0	0	20	52	68	14	0	0	2.26142	5.43009	7.42813	1.87752	6.66667	44.6667	-2.68998	0.0274851	0.638573	23.7351	FABP7	8	15540710	15544202	-	399	protein_coding	PF00061:Lipocalin / cytosolic fatty-acid binding protein family	-
ENSOARG00000016943	759	948	705	523	651	621	19.3527	21.7139	15.1892	10.4064	13.5503	15.8688	804	598.333	0.498921	0.0275244	0.638638	703.431	SESTD1	2	129780255	129869619	+	2094	protein_coding	PF13716:Divergent CRAL/TRIO domain	-
ENSOARG00000005783	2118	3020	2452	3559	3688	3040	57.7846	74.0153	56.5266	75.7729	82.1379	83.1214	2530	3429	-0.356235	0.0278707	0.644966	2938.24	MAPRE2	23	22186621	22303217	-	1957	protein_coding	PF00307:Calponin homology (CH) domain|PF03271:EB1-like C-terminal motif	CH
ENSOARG00000001389	48	49	33	15	25	16	1.20095	1.1013	0.697659	0.292869	0.510609	0.401195	43.3333	18.6667	1.31482	0.0279258	0.644967	31.369	-	JH922597.1	21	2494	+	2134	protein_coding	PF06046:Exocyst complex component Sec6	-
ENSOARG00000006261	508	397	476	395	304	330	8.82628	6.19631	6.98824	5.35564	4.31176	5.74621	460.333	343	0.513746	0.0279444	0.644967	402.097	LRP8	1	27524283	27601025	-	3073	protein_coding	PF00058:Low-density lipoprotein receptor repeat class B|PF00057:Low-density lipoprotein receptor domain class A|PF14670:Coagulation Factor Xa inhibitory site|PF07645:Calcium-binding EGF domain	Ldl_recept_a
ENSOARG00000003554	378	534	596	784	672	700	5.44729	6.91287	7.25741	8.81667	7.90541	10.1097	502.667	718.667	-0.450426	0.0280672	0.645511	601.787	DSTYK	12	2239744	2269319	-	3705	protein_coding	PF07714:Protein tyrosine kinase	Pkinase_Tyr
ENSOARG00000004395	12	15	23	41	51	38	0.596559	0.669873	0.966156	1.59058	2.06971	1.89326	16.6667	43.3333	-1.31013	0.0280774	0.645511	29.2447	CHAD	11	35781196	35784604	+	1074	protein_coding	PF13855:Leucine rich repeat|PF01462:Leucine rich repeat N-terminal domain	-
ENSOARG00000006730	0	0	0	0	36	0	0	0	0	0	0.378183	0	0	12	-5.87101	0.0280785	0.645511	5.49329	PI15	9	50990373	51023516	+	4149	protein_coding	PF00188:Cysteine-rich secretory protein family	SCP
ENSOARG00000012804	343	593	504	761	696	648	9.30563	14.4522	11.5539	16.1115	15.4144	17.619	480	701.667	-0.476057	0.0281364	0.645995	581.225	TNK1	11	26697917	26703038	+	1968	protein_coding	PF07714:Protein tyrosine kinase	Pkinase_Tyr
ENSOARG00000005504	5	1	13	0	0	0	0.160916	0.0289107	0.353525	0	0	0	6.33333	0	5.1529	0.0281505	NA	3.15298	COCH	18	40457701	40470054	+	1659	protein_coding	PF00092:von Willebrand factor type A domain|PF03815:LCCL domain	VWA
ENSOARG00000005159	277	406	281	278	820	644	11.307	14.8876	9.69219	8.85552	27.3243	26.3456	321.333	580.667	-0.800427	0.0283277	0.649534	450.051	-	23	12629779	12642081	-	1308	protein_coding	PF00079:Serpin (serine protease inhibitor)	Serpin
ENSOARG00000006094	99	27	56	32	29	18	2.83726	0.695114	1.35612	0.715672	0.678466	0.516999	60.6667	26.3333	1.34798	0.0283671	0.649585	44.2827	-	23	60962868	61000080	+	1863	protein_coding	-	-
ENSOARG00000023982	59	51	70	96	129	111	24.2318	18.8162	24.2928	30.7684	43.2503	45.6888	60	112	-0.828714	0.028493	0.650769	85.0247	RF00614	11	12426852	12426981	+	130	snoRNA	-	-
ENSOARG00000012283	226	273	244	192	222	100	38.3067	41.5678	34.9464	25.3961	30.7175	16.9871	247.667	171.333	0.6474	0.0285738	0.651765	207.012	-	1	262782251	262786587	-	315	protein_coding	PF11976:Ubiquitin-2 like Rad60 SUMO-like	-
ENSOARG00000008001	208	903	939	467	250	401	2.26136	8.81908	8.62619	3.96209	2.21878	4.36923	683.333	372.667	0.903047	0.0286901	0.653568	519.685	C1QA	2	243071846	243078666	-	4911	protein_coding	PF00386:C1q domain|PF01391:Collagen triple helix repeat (20 copies)	Collagen
ENSOARG00000004379	353	321	308	342	185	157	12.8476	10.4949	9.47205	9.71344	5.49648	5.72664	327.333	228	0.644924	0.0287414	0.653886	275.726	C1RL	3	207275702	207285576	+	1467	protein_coding	PF00089:Trypsin|PF00431:CUB domain	Trypsin
ENSOARG00000002625	351	222	189	255	125	83	4.64797	2.64081	2.11478	2.6351	1.35124	1.10151	254	154.333	0.880851	0.0288473	0.654596	204.289	ALPK1	6	13242967	13334553	-	4032	protein_coding	PF02816:Alpha-kinase family	-
ENSOARG00000006807	259	314	256	304	120	92	19.3677	21.0929	16.1758	17.7399	7.32531	6.89477	276.333	172	0.821316	0.0289718	0.655444	221.216	RAB20	10	84520996	84549751	-	714	protein_coding	PF00071:Ras family	Ras
ENSOARG00000011534	163	128	200	121	107	97	8.84442	6.23908	9.16977	5.1235	4.73949	5.27481	163.667	108.333	0.68011	0.0289846	0.655444	135.534	-	6	112895504	112896593	+	984	protein_coding	-	-
ENSOARG00000009389	112	170	230	107	109	106	2.29643	3.13122	3.98484	1.71206	1.82444	2.17819	170.667	107.333	0.72359	0.0292267	0.659034	137.753	KIF18B	11	44054083	44070017	-	2604	protein_coding	PF00225:Kinesin motor domain	Kinesin
ENSOARG00000000915	184	137	338	75	154	135	2.10052	1.40494	3.26041	0.668145	1.43515	1.54453	219.667	121.333	0.894567	0.029231	0.659034	170.311	ADGRB2	2	234812335	234842088	+	4677	protein_coding	PF01825:GPCR proteolysis site, GPS, motif|PF00002:7 transmembrane receptor (Secretin family)|PF16489:GPCR-Autoproteolysis INducing (GAIN) domain|PF00090:Thrombospondin type 1 domain	7tm_2
ENSOARG00000026211	16	0	2	41	73	8	0.3008	0	0.0317713	0.601509	1.12033	0.150731	6	40.6667	-2.5155	0.029364	0.659737	21.9127	-	13	23017064	23084809	-	2840	lincRNA	-	-
ENSOARG00000004723	980	971	890	831	732	724	29.2151	26.0033	22.4191	19.3322	17.8139	21.6308	947	762.333	0.401204	0.0294197	0.65989	854.231	CENPB	13	50745925	50747715	+	1791	protein_coding	PF04218:CENP-B N-terminal DNA-binding domain|PF09026:Centromere protein B dimerisation domain|PF03221:Tc5 transposase DNA-binding domain|PF03184:DDE superfamily endonuclease	DDE
ENSOARG00000017135	25	31	26	57	117	34	2.00421	2.23251	1.76126	3.56597	7.65693	2.73171	27.3333	69.3333	-1.22235	0.0295292	0.661424	46.4836	SPRY2	10	55821641	55822306	-	666	protein_coding	PF05210:Sprouty protein (Spry)	-
ENSOARG00000006659	581	490	396	781	659	862	27.8713	21.1157	16.0518	29.237	25.8068	41.4422	489	767.333	-0.569416	0.0295701	0.661424	628.493	PTGR1	2	11875832	11906447	+	1113	protein_coding	PF16884:N-terminal domain of oxidoreductase|PF00107:Zinc-binding dehydrogenase	ADH_zinc_N
ENSOARG00000017064	0	0	0	18	8	0	0	0	0	0.377633	0.175571	0	0	8.66667	-5.35968	0.0297081	NA	3.84659	PLS3	X	112830421	112881120	-	1986	protein_coding	PF00307:Calponin homology (CH) domain|PF13499:EF-hand domain pair	CH
ENSOARG00000001404	0	0	0	5	2	11	0	0	0	0.0553768	0.0231715	0.15646	0	6	-5.03296	0.0298443	NA	3.08872	-	JH923002.1	21	60926	-	3762	protein_coding	PF00005:ABC transporter|PF00664:ABC transporter transmembrane region	ABC_tran
ENSOARG00000002655	0	1	0	11	10	3	0	0.00953158	0	0.0910812	0.0866169	0.0319015	0.333333	8	-4.33792	0.0299143	NA	3.85854	CES4A	14	34022615	34039786	+	5032	protein_coding	PF00135:Carboxylesterase family	COesterase
ENSOARG00000007754	915	1289	1717	1861	1778	1959	16.1928	20.4919	25.6755	25.7009	25.6862	34.7448	1307	1866	-0.464909	0.0299354	0.666796	1566.55	SNX25	26	14265156	14356107	+	3017	protein_coding	PF02194:PXA domain|PF00787:PX domain|PF08628:Sorting nexin C terminal|PF00615:Regulator of G protein signaling domain	RGS
ENSOARG00000014725	3155	3591	1884	2358	1467	2197	25.7493	26.3275	12.9925	15.0179	9.77379	17.9701	2876.67	2007.33	0.605387	0.0299566	0.666796	2466.08	APLP2	21	35469791	35501952	+	6542	protein_coding	PF00014:Kunitz/Bovine pancreatic trypsin inhibitor domain|PF10515:beta-amyloid precursor protein C-terminus|PF02177:Amyloid A4 N-terminal heparin-binding|PF12925:E2 domain of amyloid precursor protein|PF12924:Copper-binding of amyloid precursor, CuBD	Kunitz_BPTI
ENSOARG00000005185	62	44	72	45	18	21	3.21701	2.05089	3.15675	1.82211	0.762431	1.09203	59.3333	28	1.19191	0.029994	0.666796	43.5417	SH3YL1	2	129922	171395	-	1029	protein_coding	PF04366:Las17-binding protein actin regulator|PF00018:SH3 domain	SH3_1
ENSOARG00000004053	207	442	287	496	467	537	5.93245	11.3793	6.95012	11.0929	10.9257	15.4238	312	500	-0.624484	0.0300498	0.667189	401.944	PRAM1	5	14784627	14792188	-	1863	protein_coding	PF14603:Helically-extended SH3 domain	-
ENSOARG00000014769	136	209	162	117	104	112	1.71906	2.37316	1.73027	1.15409	1.07313	1.41881	169	111	0.677658	0.030218	0.669228	139.844	OCRL	X	107805077	107852135	+	4224	protein_coding	PF03372:Endonuclease/Exonuclease/phosphatase family|PF00620:RhoGAP domain|PF16726:Inositol polyphosphate 5-phosphatase clathrin binding domain	RhoGAP
ENSOARG00000016828	105	103	92	167	155	194	4.19938	3.70051	3.10907	5.21209	5.0605	7.7759	100	172	-0.712372	0.0303442	0.670328	135.62	PLVAP	5	5503465	5515196	+	1335	protein_coding	PF06637:PV-1 protein (PLVAP)	-
ENSOARG00000009306	100	186	108	247	291	160	0.830101	1.38699	0.757532	1.60003	1.97192	1.33108	131.333	232.667	-0.722508	0.030387	0.670428	177.21	DOCK7	1	37492256	37655910	-	6432	protein_coding	PF06920:Dock homology region 2|PF11878:Domain of unknown function (DUF3398)|PF14429:C2 domain in Dock180 and Zizimin proteins	Ded_cyto
ENSOARG00000013927	98	120	286	382	249	278	8.67732	9.54485	21.398	26.3951	17.998	24.6694	168	303	-0.799081	0.030434	0.670619	229.2	-	18	66561182	66561784	-	603	protein_coding	PF00071:Ras family	Ras
ENSOARG00000001334	15	18	51	57	19	178	0.200923	0.216591	0.57724	0.595819	0.207759	2.38953	28	84.6667	-1.67341	0.0306354	0.673807	58.324	-	3	205663938	205677160	-	3986	protein_coding	PF00530:Scavenger receptor cysteine-rich domain	SRCR
ENSOARG00000005950	9598	9080	9286	9023	8776	6413	105.206	89.4073	86.007	77.1809	78.5275	70.4488	9321.33	8070.67	0.310524	0.0306556	0.673807	8631.7	ARAP1	15	50442619	50483505	-	4871	protein_coding	PF00788:Ras association (RalGDS/AF-6) domain|PF00169:PH domain|PF00620:RhoGAP domain|PF01412:Putative GTPase activating protein for Arf	RhoGAP
ENSOARG00000012836	755	694	757	646	685	459	32.3783	26.7359	27.4315	21.6192	23.9808	19.7276	735.333	596.667	0.404043	0.030699	0.673855	661.177	-	5	67628835	67770287	-	1245	protein_coding	PF16423:Transcription factor COE1 helix-loop-helix domain|PF01833:IPT/TIG domain|PF16422:Transcription factor COE1 DNA-binding domain	TIG
ENSOARG00000011642	4	60	27	65	100	98	0.196114	2.64258	1.11856	2.48692	4.00235	4.81536	30.3333	87.6667	-1.50884	0.0307347	0.673855	58.115	GPR68	18	54948233	54949793	-	1089	protein_coding	PF00001:7 transmembrane receptor (rhodopsin family)	7tm_1
ENSOARG00000011085	109	100	98	171	174	168	2.77527	2.28721	2.10839	3.39762	3.61655	4.28688	102.333	171	-0.656841	0.0307736	0.673864	135.438	CCDC120	X	52764006	52775305	-	2097	protein_coding	PF11819:Domain of unknown function (DUF3338)	-
ENSOARG00000008237	254	482	345	396	867	555	37.9876	64.7566	43.5988	46.2172	105.851	83.1869	360.333	606	-0.684398	0.0308652	0.674343	476.385	VAMP1	3	207867834	207869522	+	357	protein_coding	PF00957:Synaptobrevin	-
ENSOARG00000011081	1441	1061	797	2314	2230	1055	328.795	217.473	153.662	412.026	415.367	241.25	1099.67	1866.33	-0.612711	0.0308724	0.674343	1447.31	-	8	30119534	30121905	+	234	protein_coding	-	-
ENSOARG00000021923	0	0	0	7	2	9	0	0	0	5.40109	1.61428	8.91824	0	6	-4.99624	0.0310004	NA	3.007	-	13	69412477	69412530	+	54	miRNA	-	-
ENSOARG00000005343	1582	1387	1318	1311	1259	948	22.2866	17.5526	15.6892	14.4125	14.4787	13.3844	1429	1172.67	0.392038	0.0310246	0.675287	1296.09	-	12	3266745	3517572	+	3790	protein_coding	PF00620:RhoGAP domain|PF00018:SH3 domain|PF00611:Fes/CIP4, and EFC/F-BAR homology domain	RhoGAP
ENSOARG00000004933	66	144	170	237	132	372	2.86727	5.61974	6.24052	8.03477	4.68129	16.1965	126.667	247	-0.968507	0.0310313	0.675287	187.487	CCR6	8	88547398	88548722	+	1229	protein_coding	PF00001:7 transmembrane receptor (rhodopsin family)	7tm_1
ENSOARG00000009237	148	156	182	234	251	280	13.0396	12.3469	13.5495	16.0887	18.0528	24.7238	162	255	-0.594019	0.0310749	0.675397	207.222	STX10	5	10519310	10522049	+	606	protein_coding	PF09177:Syntaxin 6, N-terminal|PF05739:SNARE domain	SNARE
ENSOARG00000000288	637	609	632	565	459	468	28.3423	24.3412	23.7607	19.6175	16.6715	20.8687	626	497.333	0.419271	0.0311192	0.675522	560.561	ECI2	20	48971787	48985956	+	1200	protein_coding	PF00378:Enoyl-CoA hydratase/isomerase|PF00887:Acyl CoA binding protein	ECH
ENSOARG00000000058	113	51	60	1183	1924	2	26.1182	10.5892	11.7183	213.378	363.025	0.463285	74.6667	1036.33	-3.57723	0.0311973	0.676379	505.631	-	JH922951.1	480	710	-	231	protein_coding	-	-
ENSOARG00000011743	6928	7124	5364	7302	3826	3706	205.158	189.511	134.22	168.742	92.4895	109.987	6472	4944.67	0.509703	0.0313032	0.677835	5674.59	MPEG1	15	79433635	79463046	-	1803	protein_coding	PF01823:MAC/Perforin domain	-
ENSOARG00000017121	1958	2652	3008	3618	3259	3392	20.8167	25.3281	27.0224	30.0171	28.2847	36.1418	2539.33	3423	-0.367843	0.0313814	0.678226	2943.38	KIF21B	12	77658466	77685788	-	5022	protein_coding	PF00225:Kinesin motor domain	Kinesin
ENSOARG00000019940	800	1007	932	1309	1183	1262	10.2455	11.5852	10.0857	13.0823	12.3679	16.1979	913	1251.33	-0.383445	0.0313987	0.678226	1072.36	-	2	220146096	220154849	-	4169	protein_coding	PF04109:Autophagy protein Apg9	-
ENSOARG00000003603	1077	875	448	633	480	510	18.8473	13.7553	6.62459	8.64447	6.85713	8.94455	800	541	0.680989	0.0314826	0.678915	679.104	DPYSL3	5	56061968	56174316	-	3051	protein_coding	PF01979:Amidohydrolase family	Amidohydro_1
ENSOARG00000006978	2410	2790	2594	2501	2343	1910	49.1125	51.075	44.6676	39.7731	38.9775	39.0088	2598	2251.33	0.298182	0.0316022	0.678915	2405.93	-	14	49182258	49192861	+	2620	protein_coding	PF00071:Ras family	Ras
ENSOARG00000009956	71	190	92	78	70	46	1.99939	4.80641	2.18914	1.71409	1.60917	1.29822	117.667	64.6667	0.958859	0.031616	0.678915	90.2826	GSTCD	6	19464422	19593205	-	1896	protein_coding	PF13679:Methyltransferase domain	-
ENSOARG00000018475	197	575	487	370	212	207	12.89	33.7974	26.9254	18.8925	11.3237	13.5741	419.667	263	0.749422	0.0316429	0.678915	335.058	HMOX1	3	178680119	178684272	+	816	protein_coding	PF01126:Heme oxygenase	-
ENSOARG00000002859	5	21	17	75	7	75	0.140728	0.530955	0.404301	1.64729	0.160833	2.11555	14.3333	52.3333	-1.85897	0.0316631	0.678915	33.1538	-	JH922354.1	1634	3623	+	1897	protein_coding	PF00530:Scavenger receptor cysteine-rich domain	SRCR
ENSOARG00000001251	37	35	48	2	28	6	1.34939	1.14665	1.47919	0.0569201	0.833605	0.219301	40	12	1.83628	0.0317509	0.679136	26.0333	TOP1MT	9	14239691	14247640	+	1464	protein_coding	PF01028:Eukaryotic DNA topoisomerase I, catalytic core|PF14370:C-terminal topoisomerase domain|PF02919:Eukaryotic DNA topoisomerase I, DNA binding fragment	-
ENSOARG00000016295	0	0	0	4	0	18	0	0	0	0.105216	0	0.608062	0	7.33333	-5.38581	0.0319026	NA	3.94482	NECTIN1	15	29711841	29740291	-	1584	protein_coding	PF13927:Immunoglobulin domain|PF08205:CD80-like C2-set immunoglobulin domain|PF07686:Immunoglobulin V-set domain	V-set
ENSOARG00000011179	162	320	426	212	251	106	0.837644	1.48636	1.86123	0.855422	1.05946	0.549293	302.667	189.667	0.762869	0.0319199	0.679404	240.172	BRCA2	10	28872321	28924433	-	10326	protein_coding	PF00634:BRCA2 repeat|PF09103:BRCA2, oligonucleotide/oligosaccharide-binding, domain 1|PF09169:BRCA2, helical|PF09121:Tower|PF09104:BRCA2, oligonucleotide/oligosaccharide-binding, domain 3	-
ENSOARG00000016359	279	874	955	618	378	316	3.79526	10.6801	10.9771	6.56033	4.19755	4.30802	702.667	437.333	0.756524	0.0319444	0.679404	556.27	-	1	141219050	141320504	-	3925	protein_coding	PF00005:ABC transporter|PF00664:ABC transporter transmembrane region	ABC_membrane
ENSOARG00000013440	1114	1035	1141	1178	850	598	14.6391	12.218	12.6696	12.0802	9.11833	7.87562	1096.67	875.333	0.441154	0.0319524	0.679404	974.684	IFI44	1	54477133	54495155	+	4063	protein_coding	-	-
ENSOARG00000001591	595	634	606	656	440	311	10.6	10.1463	9.12241	9.11998	6.39896	5.5527	611.667	469	0.500752	0.0320302	0.679404	533.876	FUCA2	8	67869377	67891658	-	2997	protein_coding	PF01120:Alpha-L-fucosidase|PF16757:Alpha-L-fucosidase C-terminal domain	Alpha_L_fucos
ENSOARG00000018152	213	309	184	209	124	135	8.18755	10.6699	5.97639	6.26933	3.89101	5.2007	235.333	156	0.691824	0.0320561	0.679404	195.213	CYP20A1	2	204179979	204222542	+	1389	protein_coding	PF00067:Cytochrome P450	p450
ENSOARG00000017465	607	474	443	454	408	293	9.31025	6.531	5.74147	5.43411	5.10857	4.50395	508	385	0.517804	0.0320954	0.679404	445.822	AMOT	X	115716154	115764004	+	3481	protein_coding	PF12240:Angiomotin C terminal	-
ENSOARG00000006885	23	31	18	34	48	105	1.43126	1.73293	0.946474	1.65108	2.43836	6.54836	24	62.3333	-1.36728	0.0321449	0.679404	44.2217	NEURL2	13	74185972	74188025	-	858	protein_coding	PF07525:SOCS box|PF07177:Neuralized	SOCS_box
ENSOARG00000004805	47	122	92	201	348	60	3.56453	8.31175	5.89574	11.896	21.5452	4.56046	87	203	-1.09805	0.0321525	0.679404	137.382	-	18	33699008	33699907	-	704	protein_coding	-	-
ENSOARG00000016842	52	124	114	157	267	127	1.19261	2.55472	2.20925	2.80992	4.99887	2.91911	96.6667	183.667	-0.847657	0.0321849	0.679404	135.857	MCTP1	5	91378486	91749002	-	2328	protein_coding	PF08372:Plant phosphoribosyltransferase C-terminal|PF00168:C2 domain	C2
ENSOARG00000018943	14667	11610	13726	13087	12477	7000	441.682	314.072	349.268	307.545	306.722	211.261	13334.3	10854.7	0.419622	0.03219	0.679404	11969.4	CYBB	X	35050783	35081840	+	1773	protein_coding	PF08022:FAD-binding domain|PF01794:Ferric reductase like transmembrane component|PF08030:Ferric reductase NAD binding domain	Ferric_reduct
ENSOARG00000016873	759	900	937	780	733	648	47.3972	50.4873	49.4421	38.0107	37.3664	40.5545	865.333	720.333	0.34595	0.032256	0.679978	787.068	UNG	17	63642936	63652821	-	855	protein_coding	PF03167:Uracil DNA glycosylase superfamily	UDG
ENSOARG00000009084	7	7	2	22	9	41	0.197019	0.176985	0.0475649	0.483206	0.206785	1.1565	5.33333	24	-2.13414	0.0323581	0.681308	15.0338	RUNX1T1	9	84898333	85022806	+	1897	protein_coding	PF01753:MYND finger|PF07531:NHR1 homology to TAF|PF08788:NHR2 domain like	zf-MYND
ENSOARG00000018298	1239	1304	1680	1793	2114	1819	23.1061	21.8455	26.4735	26.0937	32.183	33.9971	1407.67	1908.67	-0.36916	0.0324535	0.682497	1638.83	DNMT3A	3	32527970	32601832	-	2863	protein_coding	PF00145:C-5 cytosine-specific DNA methylase|PF00855:PWWP domain	PWWP
ENSOARG00000002372	92	120	121	229	286	101	2.08669	2.44501	2.31901	4.05327	5.29545	2.29586	111	205.333	-0.768154	0.0327341	0.687574	152.296	-	AMGL01125906.1	21	2713	-	2354	protein_coding	PF02263:Guanylate-binding protein, N-terminal domain	-
ENSOARG00000011951	866	923	882	742	760	689	36.1231	34.5857	31.0872	24.153	25.879	28.8031	890.333	730.333	0.368832	0.0328882	0.688851	808.418	-	18	20362389	20414405	-	1280	protein_coding	PF01217:Clathrin adaptor complex small chain|PF10574:Uncharacterised protein family UPF0552	-
ENSOARG00000017709	3597	3009	4285	3083	3394	2559	71.1038	53.4322	71.5731	47.5582	54.7685	50.6963	3630.33	3012	0.357462	0.0329177	0.688851	3297.48	CAST	5	93354399	93484087	+	2701	protein_coding	PF00748:Calpain inhibitor	-
ENSOARG00000021150	1391	1755	1748	1561	1449	1177	21.9794	24.9112	23.3387	19.2483	18.6906	18.6388	1631.33	1395.67	0.311501	0.0329568	0.688851	1498.34	MTHFD1	7	73463528	73526958	+	3379	protein_coding	PF02882:Tetrahydrofolate dehydrogenase/cyclohydrolase, NAD(P)-binding domain|PF00763:Tetrahydrofolate dehydrogenase/cyclohydrolase, catalytic domain|PF01268:Formate--tetrahydrofolate ligase	-
ENSOARG00000000432	2149	5145	4900	2968	2625	2997	411.253	884.477	792.347	443.238	410.08	574.795	4064.67	2863.33	0.548653	0.0330243	0.688851	3430.6	S100A12	1	102311556	102312291	-	279	protein_coding	-	-
ENSOARG00000011024	34	25	44	15	19	6	1.11233	0.734726	1.21634	0.382955	0.507431	0.196726	34.3333	13.3333	1.48394	0.0330639	0.688851	23.6883	-	14	14265565	14267196	-	1632	protein_coding	PF04218:CENP-B N-terminal DNA-binding domain|PF03221:Tc5 transposase DNA-binding domain|PF03184:DDE superfamily endonuclease	DDE
ENSOARG00000014834	73	9	18	16	7	6	4.17751	0.462665	0.870391	0.714521	0.327009	0.344112	33.3333	9.66667	1.97965	0.0330656	0.688851	22.4834	-	14	56425932	56428603	-	933	protein_coding	PF07686:Immunoglobulin V-set domain|PF13895:Immunoglobulin domain	V-set
ENSOARG00000020524	783	784	785	754	651	542	23.9302	21.5243	20.2722	17.9827	16.2417	16.6011	784	649	0.369724	0.033158	0.688851	711.98	FMO5	1	97198475	97235884	-	1747	protein_coding	PF00743:Flavin-binding monooxygenase-like	FMO-like
ENSOARG00000001588	929	226	1082	2977	2602	1176	10.0529	2.19692	9.89354	25.1395	22.9854	12.7538	745.667	2251.67	-1.46022	0.0331891	0.688851	1432.91	-	JH921863.1	986	10405	+	4934	protein_coding	PF02841:Guanylate-binding protein, C-terminal domain	-
ENSOARG00000024898	6	12	10	0	0	2	3.76885	6.77123	5.30768	0	0	1.25905	9.33333	0.666667	3.76551	0.0332042	0.688851	5.08398	-	2	31138485	31138569	+	85	miRNA	-	-
ENSOARG00000006303	3904	3862	4777	3782	4217	2584	143.063	127.133	147.917	108.153	126.15	94.8994	4181	3527.67	0.344115	0.0332148	0.688851	3807.7	VPS4B	23	61895757	61927148	-	1457	protein_coding	PF00004:ATPase family associated with various cellular activities (AAA)|PF04212:MIT (microtubule interacting and transport) domain|PF09336:Vps4 C terminal oligomerisation domain	AAA
ENSOARG00000007977	259	890	849	522	324	380	18.4381	56.916	51.0705	28.9992	18.829	27.1114	666	408.667	0.75547	0.0333624	0.689697	528.191	C1QB	2	243051704	243053674	-	750	protein_coding	PF01391:Collagen triple helix repeat (20 copies)|PF00386:C1q domain	Collagen
ENSOARG00000016246	726	1098	1315	1654	1309	1504	9.92133	13.4792	15.1847	17.6388	14.6029	20.5985	1046.33	1489	-0.452612	0.0334472	0.689697	1249.07	MFSD6	2	117678117	117769907	-	3907	protein_coding	PF12832:MFS_1 like family	-
ENSOARG00000003133	91	94	115	181	187	128	0.82239	0.76312	0.878175	1.27648	1.37957	1.15931	100	165.333	-0.632123	0.0334536	0.689697	129.734	EML6	3	68946958	69233804	-	5908	protein_coding	PF12894:Anaphase-promoting complex subunit 4 WD40 domain|PF03451:HELP motif	-
ENSOARG00000001912	15	78	124	71	191	266	0.63562	2.96913	4.43991	2.34782	6.60703	11.2964	72.3333	176	-1.32579	0.033506	0.689697	124.638	-	JH923038.1	5014	6386	-	1260	protein_coding	PF07686:Immunoglobulin V-set domain	V-set
ENSOARG00000011842	5307	4967	4857	4132	4636	3922	427.378	359.324	330.505	259.671	304.771	316.537	5043.67	4230	0.342277	0.0335151	0.689697	4632.06	LAT2	24	33095761	33103636	-	663	protein_coding	PF15703:Linker for activation of T-cells family member 2	-
ENSOARG00000001279	283	420	272	636	241	962	30.8997	41.1951	25.0948	54.1907	21.4808	105.268	325	613	-0.895114	0.0335197	0.689697	475.355	-	JH924580.1	4046	13323	+	489	protein_coding	PF00337:Galactoside-binding lectin	-
ENSOARG00000014676	0	3	0	12	11	11	0	0.0649024	0	0.225524	0.216257	0.265496	1	11.3333	-3.4355	0.0336063	0.689697	5.98636	IL17RD	19	43978919	43999157	+	2217	protein_coding	PF16742:N-terminus of interleukin 17 receptor D|PF08357:SEFIR domain	-
ENSOARG00000020894	374	419	511	393	272	315	12.7027	12.784	14.6653	10.4164	7.54153	10.7223	434.667	326.667	0.48644	0.0336188	0.689697	378.359	ETV6	3	202811328	203017348	-	1572	protein_coding	PF00178:Ets-domain|PF02198:Sterile alpha motif (SAM)/Pointed domain	Ets
ENSOARG00000003193	0	1	0	7	1	15	0	0.0551298	0	0.33524	0.0500984	0.922576	0.333333	7.66667	-4.43423	0.0336936	NA	4.14256	C1QTNF1	11	52351886	52356757	-	870	protein_coding	PF01391:Collagen triple helix repeat (20 copies)|PF00386:C1q domain	Collagen
ENSOARG00000019320	637	568	679	829	942	878	13.7417	11.0072	12.3771	13.9558	16.589	18.9823	628	883	-0.415622	0.0337895	0.692309	749.884	ATG16L1	1	7455336	7499352	-	2475	protein_coding	PF08614:Autophagy protein 16 (ATG16)|PF00400:WD domain, G-beta repeat	WD40
ENSOARG00000010470	90	79	115	30	88	13	13.5743	10.7036	14.6561	3.53098	10.8348	1.96504	94.6667	43.6667	1.24681	0.0339577	0.694942	68.4221	MLN	20	8034171	8038168	-	354	protein_coding	PF04644:Motilin/ghrelin|PF04643:Motilin/ghrelin-associated peptide	-
ENSOARG00000016459	23	49	46	74	107	65	3.30112	6.31769	5.57877	8.2883	12.5367	9.34977	39.3333	82	-0.986674	0.0341008	0.696244	59.0314	TRBV25-1	4	105493718	105494216	+	372	protein_coding	PF07686:Immunoglobulin V-set domain	V-set
ENSOARG00000014651	4	8	7	43	28	8	0.07603	0.136598	0.112427	0.637813	0.43446	0.152394	6.33333	26.3333	-1.91634	0.0342712	0.697657	15.2323	MOB3B	2	94934882	95077788	-	2809	protein_coding	PF03637:Mob1/phocein family	-
ENSOARG00000007940	418	290	349	152	332	209	6.72631	4.19206	4.7454	1.90873	4.36119	3.37055	352.333	231	0.699745	0.0343017	0.697657	293.543	SEL1L3	6	45090612	45199473	-	3318	protein_coding	-	-
ENSOARG00000020605	609	723	669	952	950	808	17.2589	18.4061	16.0202	21.0539	21.9779	22.9488	667	903.333	-0.352529	0.0343293	0.697657	775.174	PIAS3	1	98212851	98219718	-	1884	protein_coding	PF02891:MIZ/SP-RING zinc finger|PF14324:PINIT domain	zf-MIZ
ENSOARG00000007592	1691	1960	1347	1388	1644	863	32.5238	33.8643	21.8913	20.8328	25.8122	16.635	1666	1298.33	0.478725	0.0344553	0.699407	1471.2	PTGS2	12	65834369	65841232	-	2776	protein_coding	PF03098:Animal haem peroxidase	An_peroxidase
ENSOARG00000006054	103	95	151	258	102	312	2.23099	1.84847	2.76365	4.36094	1.80354	6.7728	116.333	224	-0.915892	0.0346381	0.700727	170.447	GAREM1	23	24985018	25216924	+	2465	protein_coding	PF12736:Cell-cycle sustaining, positive selection,	-
ENSOARG00000013291	2587	2269	2393	2587	1789	1574	32.0402	25.2442	25.0431	25.0032	18.0874	19.537	2416.33	1983.33	0.393491	0.0346948	0.700727	2185.06	IFI30	5	4781440	4863530	-	4311	protein_coding	PF03227:Gamma interferon inducible lysosomal thiol reductase (GILT)	-
ENSOARG00000009351	1111	1582	1301	1811	1984	1641	420.699	538.137	416.276	535.151	613.29	622.759	1331.33	1812	-0.365233	0.0346966	0.700727	1551.29	STMP1	4	99249556	99251056	+	141	protein_coding	-	-
ENSOARG00000016091	40	83	97	59	26	22	2.67629	4.98862	5.48394	3.08053	1.42008	1.4752	73.3333	35.6667	1.13422	0.0347168	0.700727	53.3799	-	4	105414696	105415589	+	798	protein_coding	PF07686:Immunoglobulin V-set domain	V-set
ENSOARG00000008428	3	2	3	24	17	6	0.0932341	0.0558357	0.078781	0.582056	0.43129	0.186878	2.66667	15.6667	-2.40752	0.0347203	0.700727	8.58413	STRA8	4	98837986	98861035	+	1718	protein_coding	-	-
ENSOARG00000015895	4402	3457	4064	3879	3705	2092	54.2673	38.2839	42.334	37.3172	37.2858	25.8466	3974.33	3225.33	0.423929	0.0347889	0.70088	3564.15	PLXNC1	3	130271380	130424374	+	4331	protein_coding	PF01833:IPT/TIG domain|PF01437:Plexin repeat|PF08337:Plexin cytoplasmic RasGAP domain	PSI
ENSOARG00000012881	5	35	12	50	41	63	0.19345	1.21645	0.392307	1.50962	1.29494	2.44282	17.3333	51.3333	-1.53529	0.0348113	0.70088	34.0124	-	14	54862709	54874596	-	1380	protein_coding	PF01285:TEA/ATTS domain family	TEA
ENSOARG00000007006	356	256	302	504	402	517	5.14413	3.323	3.68736	5.6832	4.74193	7.48698	304.667	474.333	-0.559655	0.034848	0.70088	388.407	LRRC1	20	6712223	6796275	-	3695	protein_coding	PF13855:Leucine rich repeat	-
ENSOARG00000021259	43	9	24	6	5	10	12.0202	2.26003	5.66893	1.30886	1.14098	2.80154	25.3333	7	1.93598	0.0350457	0.704048	16.8215	RF00004	21	40540248	40540438	-	191	snRNA	-	-
ENSOARG00000012542	49	87	80	230	120	81	0.782828	1.24859	1.07996	2.86747	1.56501	1.29691	72	143.667	-0.882527	0.0351447	0.704472	103.35	-	3	165773751	165830480	+	3342	protein_coding	PF14858:Domain of unknown function (DUF4486)	-
ENSOARG00000018275	78	111	121	153	186	174	1.59807	2.04293	2.09476	2.44621	3.11087	3.57277	103.333	171	-0.667311	0.0351943	0.704609	135.462	CASS4	13	58786094	58819904	-	2606	protein_coding	PF12026:Domain of unknown function (DUF3513)|PF14604:Variant SH3 domain|PF08824:Serine rich protein interaction domain	-
ENSOARG00000008923	2083	2387	2770	2441	1923	1784	37.9965	39.1143	42.6953	34.7474	28.6352	32.6139	2413.33	2049.33	0.319455	0.0352803	0.705525	2208.81	OXCT1	16	32617427	32779330	+	2927	protein_coding	PF01144:Coenzyme A transferase	-
ENSOARG00000016168	1868	2963	3339	4093	4209	2995	52.3001	74.5223	78.9931	89.4268	96.1992	84.0381	2723.33	3765.67	-0.389882	0.0354291	0.707261	3171.16	TRIB2	3	21432304	21459979	+	1907	protein_coding	PF00069:Protein kinase domain	Pkinase
ENSOARG00000010668	2102	2667	2539	3526	3196	2767	16.1111	18.3631	16.4438	21.09	19.9971	21.2547	2436	3163	-0.292278	0.0354829	0.707261	2758.92	PRKD2	14	52861520	52896367	-	6966	protein_coding	PF00069:Protein kinase domain|PF00130:Phorbol esters/diacylglycerol binding domain (C1 domain)	Pkinase
ENSOARG00000025779	72	28	61	37	24	9	3.33122	1.16374	2.38478	1.3359	0.90646	0.417318	53.6667	23.3333	1.35907	0.0354882	0.707261	38.4927	-	2	79362308	79363579	-	1154	lincRNA	-	-
ENSOARG00000006714	919	106	36	97	59	42	49.7136	5.15103	1.64554	4.09479	2.60542	2.277	353.667	66	2.65099	0.0356119	0.70892	225.777	P2RY6	15	50987484	50988470	+	987	protein_coding	PF00001:7 transmembrane receptor (rhodopsin family)	7tm_1
ENSOARG00000010699	9	21	20	3	7	1	0.114931	0.240904	0.215811	0.0298963	0.0729728	0.0127982	16.6667	3.66667	2.28825	0.0356533	0.708938	10.0511	SLC18A1	2	45387811	45431760	+	4181	protein_coding	PF07690:Major Facilitator Superfamily	MFS_1
ENSOARG00000002154	14	40	298	14	0	0	1.52861	3.92335	27.4936	1.19288	0	0	117.333	4.66667	4.77855	0.035818	0.710512	58.4262	SC5	19	51587861	51589754	-	489	protein_coding	PF00666:Cathelicidin	-
ENSOARG00000011424	1728	1956	1178	2083	3387	2074	84.566	85.9903	48.7129	79.5502	135.311	101.722	1620.67	2514.67	-0.53085	0.0358683	0.710512	2044.23	FHL1	X	93880470	93883714	-	1091	protein_coding	PF00412:LIM domain	LIM
ENSOARG00000007238	1220	1326	948	1274	625	684	39.3347	38.4051	25.8269	32.0543	16.4499	22.1017	1164.67	861	0.551379	0.0358947	0.710512	1008.5	PAK1	21	17994065	18071164	+	1656	protein_coding	PF00786:P21-Rho-binding domain|PF00069:Protein kinase domain	Pkinase
ENSOARG00000009547	554	499	403	670	825	686	12.0535	9.75285	7.4089	11.3757	14.6529	14.9582	485.333	727	-0.489528	0.0360019	0.711043	602.346	SHQ1	19	28850201	28949267	+	2454	protein_coding	PF04925:SHQ1 protein	-
ENSOARG00000019750	58	289	186	126	106	30	1.88023	8.41608	5.09498	3.18753	2.80515	0.974671	177.667	87.3333	1.13982	0.0360386	0.711043	128.817	KLHL33	7	23857628	23859747	+	1647	protein_coding	PF13964:Kelch motif|PF07707:BTB And C-terminal Kelch|PF01344:Kelch motif|PF00651:BTB/POZ domain	BACK
ENSOARG00000001244	74	54	77	112	128	129	1.69353	1.11016	1.48902	2.00023	2.39132	2.95873	68.3333	123	-0.775231	0.0360747	0.711043	94.9725	SERPINI1	1	217661235	217691116	-	2333	protein_coding	PF00079:Serpin (serine protease inhibitor)	Serpin
ENSOARG00000017261	479	507	488	507	260	316	37.7209	35.8661	32.4723	31.157	16.7143	24.9395	491.333	361	0.541755	0.0361361	0.711273	424.045	C19orf38	5	12981690	12992005	+	678	protein_coding	-	-
ENSOARG00000015705	277	187	253	158	228	89	15.8009	9.58233	12.1946	7.03328	10.617	5.08797	239	158.333	0.720538	0.0362036	0.71158	197.419	B3GALT5	1	257862102	257863037	+	936	protein_coding	PF01762:Galactosyltransferase	Galactosyl_T
ENSOARG00000025562	1	5	17	0	1	0	0.0415179	0.186481	0.596391	0	0.0338924	0	7.66667	0.333333	4.42869	0.0362056	NA	3.86254	-	1	114570948	114573332	-	1286	lincRNA	-	-
ENSOARG00000011340	23	58	49	22	17	17	0.187084	0.423804	0.336784	0.139647	0.112882	0.138583	43.3333	18.6667	1.27985	0.036233	0.71158	30.7322	MMP16	9	86978756	87360859	+	6564	protein_coding	PF11857:Domain of unknown function (DUF3377)|PF00045:Hemopexin|PF00413:Matrixin|PF01471:Putative peptidoglycan binding domain	Hemopexin
ENSOARG00000008079	431	549	769	642	1195	849	42.3793	48.4929	63.8925	49.262	95.9205	83.6639	583	895.333	-0.563396	0.036314	0.712216	728.421	NCR3	20	26842084	26844306	+	543	protein_coding	PF07686:Immunoglobulin V-set domain	V-set
ENSOARG00000014504	26	0	0	0	0	0	5.3806	0	0	0	0	0	8.66667	0	5.76837	0.0363782	0.712216	4.84682	-	19	45241567	45241824	-	258	processed_pseudogene	-	-
ENSOARG00000003374	272	214	190	105	184	148	6.9854	4.93702	4.12309	2.10432	3.85751	3.80923	225.333	145.667	0.715838	0.0364636	0.712216	187.637	LRRN3	4	57220545	57222916	-	2079	protein_coding	PF13855:Leucine rich repeat|PF07679:Immunoglobulin I-set domain|PF00041:Fibronectin type III domain	I-set
ENSOARG00000001187	798	2135	1778	2402	2911	1973	6.00266	14.4267	11.3011	14.0998	17.8751	14.8738	1570.33	2428.67	-0.561978	0.036504	0.712216	1950.69	ITGA6	2	136225512	136275286	-	7098	protein_coding	PF13517:Repeat domain in Vibrio, Colwellia, Bradyrhizobium and Shewanella|PF08441:Integrin alpha	-
ENSOARG00000000717	339	435	312	250	244	283	51.5667	59.4412	40.1025	29.6763	30.2988	43.1429	362	259	0.552918	0.0366076	0.712216	311.979	-	4	87868028	87883164	-	351	protein_coding	PF04716:ETC complex I subunit conserved region	-
ENSOARG00000008570	65	116	109	162	168	157	2.43543	3.90435	3.45092	4.73671	5.13852	5.89542	96.6667	162.333	-0.684639	0.0366113	0.712216	127.374	RBMS2	3	162767299	162824005	-	1425	protein_coding	PF00076:RNA recognition motif. (a.k.a. RRM, RBD, or RNP domain)	RRM_1
ENSOARG00000016798	6502	13052	9949	16598	15543	10490	672.781	1213.2	869.868	1340.24	1312.89	1087.82	9834.33	14210.3	-0.441333	0.0367097	0.712216	11724.4	SAT1	X	21149594	21152140	+	516	protein_coding	PF00583:Acetyltransferase (GNAT) family	Acetyltransf_1
ENSOARG00000018230	0	0	0	6	6	5	0	0	0	0.151787	0.158782	0.162445	0	5.66667	-4.85745	0.0367831	NA	2.72453	-	5	49130095	49139688	-	1647	protein_coding	-	-
ENSOARG00000004905	52	52	36	97	91	85	3.47918	3.1254	2.03528	5.06461	4.97029	5.69963	46.6667	91	-0.867701	0.0368084	0.712216	68.0099	PUSL1	12	49283888	49286061	-	798	protein_coding	PF01416:tRNA pseudouridine synthase	-
ENSOARG00000007513	13	14	25	56	38	37	0.26472	0.256095	0.430161	0.889882	0.631676	0.755091	17.3333	43.6667	-1.25602	0.0368322	0.712216	29.5971	SYNPO	5	59501325	59534052	+	2622	protein_coding	-	-
ENSOARG00000000378	614	644	668	1006	1232	609	110.38	104	101.471	141.13	180.8	109.721	642	949	-0.452368	0.0368346	0.712216	776.446	TCEAL8	X	122038906	122039483	+	297	protein_coding	PF04538:Brain expressed X-linked like family	-
ENSOARG00000019002	0	0	0	11	2	5	0	0	0	0.484996	0.0922447	0.283119	0	6	-4.92021	0.0368544	NA	2.84357	RGS16	12	61756663	61760851	-	945	protein_coding	PF00615:Regulator of G protein signaling domain	RGS
ENSOARG00000013928	3	7	6	0	0	0	0.0948349	0.198781	0.160267	0	0	0	5.33333	0	4.9185	0.0368884	NA	2.68091	MMP17	17	44829667	44852099	-	1689	protein_coding	PF01471:Putative peptidoglycan binding domain|PF00413:Matrixin|PF00045:Hemopexin	Hemopexin
ENSOARG00000001980	1552	1870	2034	2508	2423	2136	25.6705	27.7852	28.4276	32.3721	32.7162	35.4077	1818.67	2355.67	-0.295397	0.0369528	0.712319	2058.67	NLRC3	24	2938171	2954051	-	3228	protein_coding	PF05729:NACHT domain|PF13516:Leucine Rich repeat	NACHT
ENSOARG00000026757	10	9	24	59	46	21	0.695209	0.562065	1.40985	3.20087	2.6106	1.46315	14.3333	42	-1.44634	0.0369675	0.712319	26.7118	-	22	38677015	38798788	+	768	lincRNA	-	-
ENSOARG00000017587	68	104	41	122	239	93	4.23154	5.81368	2.15586	5.92447	12.141	5.79997	71	151.333	-0.971321	0.0370025	0.712319	108.228	PDCD1	1	79926	87689	+	858	protein_coding	PF07686:Immunoglobulin V-set domain	V-set
ENSOARG00000014749	19	15	6	0	5	0	0.69293	0.491423	0.184899	0	0.148858	0	13.3333	1.66667	3.17183	0.0371695	0.714749	7.76828	ALDH8A1	8	59987597	60013962	-	1464	protein_coding	PF00171:Aldehyde dehydrogenase family	Aldedh
ENSOARG00000009129	189	522	245	501	857	373	9.63811	23.9127	10.5571	19.9374	35.6761	19.0631	318.667	577	-0.7603	0.0373029	0.715858	434.988	-	4	50075590	50100111	-	1047	protein_coding	PF07654:Immunoglobulin C1-set domain|PF07686:Immunoglobulin V-set domain	V-set
ENSOARG00000011794	803	889	1178	436	766	778	24.5836	24.449	30.4735	10.4164	19.1437	23.8706	956.667	660	0.574966	0.0373178	0.715858	810.617	SLC9B2	6	21899540	21955132	+	1744	protein_coding	PF00999:Sodium/hydrogen exchanger family	Na_H_Exchanger
ENSOARG00000008714	5	8	3	14	28	22	1.61794	2.32547	0.820278	3.53526	7.39635	7.13459	5.33333	21.3333	-1.9252	0.037436	0.716534	13.1708	-	24	14025822	14026147	-	165	protein_coding	-	-
ENSOARG00000018900	293	503	516	790	470	783	9.49841	14.648	14.1345	19.9853	12.4379	25.4389	437.333	681	-0.594237	0.0374669	0.716534	553.659	CPNE2	14	24562874	24594126	+	1647	protein_coding	PF00168:C2 domain|PF07002:Copine	C2
ENSOARG00000008304	0	2	9	1	18	55	0	0.0642074	0.271779	0.0278886	0.525128	1.96989	3.66667	24.6667	-2.88344	0.0375501	0.716667	14.92	GYG2	X	1270407	1286014	+	1494	protein_coding	PF01501:Glycosyl transferase family 8	Glyco_transf_8
ENSOARG00000010954	560	604	630	580	467	421	18.0553	17.4937	17.1634	14.593	12.2914	13.6035	598	489.333	0.37999	0.0375557	0.716667	539.684	-	18	18703168	18719850	-	1656	protein_coding	PF09737:De-etiolated protein 1 Det1	-
ENSOARG00000017304	83	122	82	52	70	49	5.35858	7.07554	4.47334	2.61984	3.68923	3.17045	95.6667	57	0.834551	0.0376547	0.716848	76.3026	SPATA9	5	92324087	92352584	-	827	protein_coding	PF15824:Spermatogenesis-associated protein 9	-
ENSOARG00000003464	36	39	4	78	112	50	7.45006	7.25021	0.699461	12.5966	18.9209	10.37	26.3333	80	-1.45097	0.0376817	0.716848	51.6897	-	2	33475021	33475278	-	258	protein_coding	-	-
ENSOARG00000008650	32	83	33	26	9	23	1.67999	3.91438	1.46392	1.0652	0.385713	1.21014	49.3333	19.3333	1.41251	0.0377987	0.718176	34.5592	FBP1	2	31653188	31684127	+	1017	protein_coding	PF00316:Fructose-1-6-bisphosphatase, N-terminal domain	-
ENSOARG00000014990	73	127	96	161	245	121	1.73536	2.71206	1.92835	2.98671	4.75444	2.88274	98.6667	175.667	-0.737495	0.0380187	0.719115	133.538	ZNF613	14	56684750	56695398	+	2246	protein_coding	PF00096:Zinc finger, C2H2 type|PF01352:KRAB box	KRAB
ENSOARG00000020478	27	28	31	16	12	4	0.64414	0.600072	0.624921	0.297877	0.233703	0.0956379	28.6667	10.6667	1.55998	0.0380638	0.719115	19.5376	TP63	1	195682402	195845074	-	2238	protein_coding	PF07647:SAM domain (Sterile alpha motif)|PF07710:P53 tetramerisation motif|PF00870:P53 DNA-binding domain	P53
ENSOARG00000014425	419	130	184	240	96	72	5.93875	1.65521	2.20367	2.65456	1.11076	1.02274	244.333	136	1.02791	0.0381055	0.719115	192.078	MERTK	3	105945465	106063047	+	3767	protein_coding	PF07714:Protein tyrosine kinase|PF13895:Immunoglobulin domain|PF00047:Immunoglobulin domain|PF00041:Fibronectin type III domain	Pkinase_Tyr
ENSOARG00000001928	8	19	29	28	35	92	0.167308	0.356951	0.512473	0.456966	0.597531	1.92827	18.6667	51.6667	-1.51207	0.0381571	0.719115	35.8635	-	JH922644.1	1717	8848	-	2553	protein_coding	PF00530:Scavenger receptor cysteine-rich domain	SRCR
ENSOARG00000021539	0	0	2	9	6	12	0	0	0.75824	3.15117	2.19759	5.39591	0.666667	9	-3.7656	0.0381916	0.719115	4.78522	RF00001	4	103870336	103870454	-	119	rRNA	-	-
ENSOARG00000003717	23	24	3	55	57	44	0.647689	0.607125	0.0713849	1.20865	1.31033	1.24178	16.6667	52	-1.51189	0.0382131	0.719115	33.7243	TMCC2	12	2313332	2349980	+	1896	protein_coding	PF10267:Predicted transmembrane and coiled-coil 2 protein	-
ENSOARG00000004803	2906	7713	6425	9674	8358	7607	771.927	1840.49	1442.12	2005.33	1812.38	2025.11	5681.33	8546.33	-0.52702	0.0382176	0.719115	6957.23	CD52	2	239674608	239675963	-	201	protein_coding	-	-
ENSOARG00000018473	3	7	10	0	1	0	0.847493	1.7764	2.38705	0	0.230612	0	6.66667	0.333333	4.26341	0.0382337	NA	3.46525	-	3	175135412	175135600	-	189	protein_coding	-	-
ENSOARG00000007373	214	166	355	195	195	84	6.91222	4.8166	9.689	4.91517	5.14168	2.71917	245	158	0.742376	0.0383681	0.719825	197.69	-	3	81327580	81427261	-	1653	protein_coding	PF17226:MTA R1 domain|PF01448:ELM2 domain|PF01426:BAH domain|PF00320:GATA zinc finger	BAH
ENSOARG00000010208	1	3	2	5	7	27	0.012469	0.0336032	0.0210721	0.0486519	0.0712516	0.337402	2	13	-2.74962	0.038383	0.719825	7.84494	RBM20	22	30253100	30325727	+	4282	protein_coding	-	-
ENSOARG00000001576	52	141	81	170	218	126	1.17296	2.85711	1.54387	2.99245	4.01422	2.84841	91.3333	171.333	-0.821832	0.038469	0.719825	127.729	FGFR1	26	32193842	32208102	-	2367	protein_coding	PF07679:Immunoglobulin I-set domain|PF07714:Protein tyrosine kinase|PF00047:Immunoglobulin domain	Pkinase_Tyr
ENSOARG00000000605	310	399	318	211	297	240	2.71961	3.14446	2.35732	1.44453	2.127	2.11013	342.333	249.333	0.533898	0.0385131	0.719825	295.851	PLXNB1	19	51378857	51401708	+	6086	protein_coding	PF08337:Plexin cytoplasmic RasGAP domain|PF01403:Sema domain|PF01437:Plexin repeat|PF01833:IPT/TIG domain	Sema
ENSOARG00000020416	4346	2795	3511	3671	2955	1538	38.3034	22.1288	26.1472	25.2483	21.2604	13.5849	3550.67	2721.33	0.525179	0.0385493	0.719825	3107.1	ATP13A3	1	191315661	191393833	+	6058	protein_coding	PF00702:haloacid dehalogenase-like hydrolase|PF00122:E1-E2 ATPase|PF12409:P5-type ATPase cation transporter	E1-E2_ATPase
ENSOARG00000011071	511	586	526	912	722	629	16.8833	17.3925	14.6848	23.5142	19.4733	20.8276	541	754.333	-0.383378	0.0385558	0.719825	637.29	-	3	8161462	8195293	+	1616	protein_coding	PF10358:N-terminal C2 in EEIG1 and EHBP1 proteins	-
ENSOARG00000003477	393	328	439	325	348	219	20.022	15.0113	18.8985	12.9211	14.4731	11.1818	386.667	297.333	0.481304	0.03863	0.719825	339.017	FRA10AC1	22	14680129	14719604	-	1048	protein_coding	PF09725:Folate-sensitive fragile site protein Fra10Ac1	-
ENSOARG00000001632	1121	1693	1691	2263	1896	1957	25.3827	34.4365	32.3537	39.9869	35.0459	44.4096	1501.67	2038.67	-0.373432	0.0388957	0.723238	1744.88	STIM1	15	49313828	49506183	-	2358	protein_coding	PF16533:STIM1 Orai1-activating region|PF07647:SAM domain (Sterile alpha motif)	SAM_2
ENSOARG00000011867	34	84	56	104	84	162	3.28864	7.2987	4.57691	7.85003	6.63259	15.7039	58	116.667	-0.98777	0.0389322	0.723238	87.5121	RFLNB	11	21886090	21891132	+	552	protein_coding	PF15068:FAM101 family	-
ENSOARG00000010901	231	205	228	340	388	268	7.17903	5.72316	5.98736	8.2458	9.84355	8.34722	221.333	332	-0.48684	0.0391048	0.725676	272.305	MEAK7	14	10169728	10189369	-	1718	protein_coding	PF07534:TLD	-
ENSOARG00000020609	220	315	284	474	363	363	3.30694	4.25347	3.60719	5.5601	4.45427	5.46845	273	400	-0.470824	0.0392888	0.728319	331.022	VWA5B2	1	201141130	201152800	-	3552	protein_coding	PF13768:von Willebrand factor type A domain	-
ENSOARG00000014418	489	474	704	788	743	852	14.8768	12.9541	18.0975	18.7079	18.4525	25.9772	555.667	794.333	-0.457793	0.0393537	0.728751	669.275	GRK4	6	115152228	115192096	-	1755	protein_coding	PF00069:Protein kinase domain|PF00615:Regulator of G protein signaling domain	Pkinase
ENSOARG00000025904	1	0	0	2	3	16	0.0331834	0	0	0.0517906	0.0812659	0.532101	0.333333	7	-4.34285	0.039538	NA	3.92378	-	24	40561696	40565703	+	1609	lincRNA	-	-
ENSOARG00000003020	51	46	67	157	118	56	8.72755	7.07145	9.68821	20.9663	16.4843	9.60426	54.6667	110.333	-0.888521	0.0395741	0.732058	79.1706	-	3	206576109	206583126	-	312	protein_coding	-	-
ENSOARG00000014140	4609	5336	5041	4306	4721	3945	134.767	140.159	124.549	98.254	112.688	115.605	4995.33	4324	0.290559	0.0396781	0.733208	4635.54	UNC93B1	21	44799337	44808198	-	1826	protein_coding	-	-
ENSOARG00000000517	106	401	147	415	712	219	2.68735	9.13254	3.14907	8.21044	14.7355	5.56437	218	448.667	-0.93058	0.0398461	0.734943	320.314	ADGRG1	14	25059450	25071450	+	2106	protein_coding	PF01825:GPCR proteolysis site, GPS, motif|PF00002:7 transmembrane receptor (Secretin family)	7tm_2
ENSOARG00000004768	273	145	74	123	94	59	4.0321	1.92382	0.923521	1.41767	1.13335	0.873321	164	92	1.00098	0.0398714	0.734943	130.203	NACC2	3	3275515	3312889	+	3615	protein_coding	PF00651:BTB/POZ domain|PF10523:BEN domain	BTB
ENSOARG00000019269	9	15	17	3	3	3	0.210113	0.31458	0.335356	0.0546553	0.057174	0.0701916	13.6667	3	2.24816	0.039938	0.734943	8.3341	JPH4	7	20987123	20994794	+	2287	protein_coding	-	-
ENSOARG00000000766	671	767	799	1065	1042	856	39.6745	40.7392	39.9193	49.1404	50.2948	50.7243	745.667	987.667	-0.319715	0.0399716	0.734943	854.13	ENDOV	11	51243368	51257814	-	903	protein_coding	PF04493:Endonuclease V	-
ENSOARG00000008468	64	201	191	307	380	164	3.29517	9.29657	8.30956	12.3349	15.9716	8.46244	152	283.667	-0.81437	0.040049	0.734943	209.204	EMB	16	28708496	28750521	+	1037	protein_coding	PF07679:Immunoglobulin I-set domain	I-set
ENSOARG00000008728	1477	1455	1611	1580	1268	1024	39.4695	34.9279	36.3767	32.9487	27.6609	27.4243	1514.33	1290.67	0.330388	0.0401697	0.734943	1389	PAPSS1	6	17598096	17709953	+	1998	protein_coding	PF01583:Adenylylsulphate kinase|PF14306:PUA-like domain|PF01747:ATP-sulfurylase	-
ENSOARG00000011911	53	50	6	72	125	104	10.7189	9.08388	1.02535	11.3633	20.6371	21.0795	36.3333	100.333	-1.35407	0.040198	0.734943	68.2119	-	19	41365833	41369263	+	264	protein_coding	-	-
ENSOARG00000010328	4940	4130	4277	3677	4335	3146	245.584	184.438	179.663	142.648	175.925	156.742	4449	3719.33	0.358408	0.0402421	0.734943	4074.44	DNASE2	5	10756279	10758393	+	1074	protein_coding	PF03265:Deoxyribonuclease II	-
ENSOARG00000016388	23	55	92	130	109	103	2.31265	4.96791	7.81658	10.2006	8.94695	10.3794	56.6667	114	-0.962269	0.040425	0.734943	82.8735	-	4	105487183	105488001	+	531	protein_coding	PF07686:Immunoglobulin V-set domain	V-set
ENSOARG00000020710	305	95	78	104	107	17	3.65289	1.02209	0.789365	0.972009	1.04613	0.204051	159.333	76	1.29019	0.0404338	0.734943	119.783	NID2	7	41930461	42013294	-	4458	protein_coding	PF07474:G2F domain|PF00058:Low-density lipoprotein receptor repeat class B|PF12662:Complement Clr-like EGF-like|PF00086:Thyroglobulin type-1 repeat|PF12947:EGF domain|PF06119:Nidogen-like|PF07645:Calcium-binding EGF domain	EGF_CA
ENSOARG00000025387	50	52	51	17	17	34	0.577586	0.539609	0.49781	0.153248	0.160311	0.393622	51	22.6667	1.20364	0.0404467	0.734943	37.5202	-	X	95048211	95092619	-	4622	lincRNA	-	-
ENSOARG00000007256	889	1249	1199	1617	1523	1297	11.4984	14.512	13.104	16.321	16.0806	16.8124	1112.33	1479	-0.331254	0.0404542	0.734943	1275.06	CCDC88B	21	41940650	41955231	+	4128	protein_coding	PF05622:HOOK protein	-
ENSOARG00000003052	184	298	306	244	161	153	5.64606	8.21434	7.93406	5.84275	4.03292	4.70514	262.667	186	0.579908	0.0404816	0.734943	221.343	MAOA	X	40680225	40760099	+	1740	protein_coding	PF01593:Flavin containing amine oxidoreductase	Amino_oxidase
ENSOARG00000005557	375	374	378	383	239	234	22.7782	20.4074	19.4011	18.1546	11.8509	14.2448	375.667	285.333	0.498484	0.0404945	0.734943	328.372	PLSCR1	1	240047714	240066568	+	879	protein_coding	PF03803:Scramblase	Scramblase
ENSOARG00000006079	1745	1940	1668	2489	2480	2144	92.9832	92.8623	75.1021	103.498	107.877	114.495	1784.33	2371	-0.321066	0.0405071	0.734943	2056	P2RY10	X	66575764	66576765	+	1002	protein_coding	PF00001:7 transmembrane receptor (rhodopsin family)	7tm_1
ENSOARG00000008771	4011	4939	4618	6116	5948	5370	294.98	326.293	286.973	351	357.09	395.793	4522.67	5811.33	-0.281624	0.0405272	0.734943	5108.05	SRSF7	3	85340575	85345847	+	726	protein_coding	PF00076:RNA recognition motif. (a.k.a. RRM, RBD, or RNP domain)	RRM_1
ENSOARG00000007011	1460	1247	1563	1317	1206	1063	41.1141	31.5452	37.1915	28.9417	27.7238	30.0003	1423.33	1195.33	0.341525	0.040598	0.735203	1302.82	TRIM25	11	7267690	7282975	-	1896	protein_coding	PF13765:SPRY-associated domain|PF00622:SPRY domain	SPRY
ENSOARG00000018142	2813	4383	4012	3428	3219	2723	43.7113	61.182	52.6782	41.5685	40.833	42.4058	3736	3123.33	0.336208	0.0406254	0.735203	3392.91	LMNB1	5	24625371	24679085	-	3436	protein_coding	PF00038:Intermediate filament protein|PF00932:Lamin Tail Domain	Filament
ENSOARG00000005709	1203	573	847	689	794	400	18.1596	7.77007	10.8037	8.11636	9.78428	6.05139	874.333	627.667	0.61462	0.0406955	0.735643	750.5	COBLL1	2	143684185	143752953	+	3537	protein_coding	PF09469:Cordon-bleu ubiquitin-like domain	-
ENSOARG00000003942	306	572	409	616	587	754	14.5615	24.4517	16.4458	22.8752	22.8028	35.9591	429	652.333	-0.55624	0.0408091	0.735643	537.81	ZNF830	11	14709592	14710713	-	1122	protein_coding	-	-
ENSOARG00000015775	498	291	321	255	288	242	11.1299	5.84228	6.06195	4.44735	5.25436	5.42038	370	261.667	0.605719	0.0408178	0.735643	318.676	GPT2	14	14836920	14869026	+	2389	protein_coding	PF00155:Aminotransferase class I and II	Aminotran_1_2
ENSOARG00000016182	5	10	4	0	1	0	0.406332	0.730029	0.274674	0	0.0663404	0	6.33333	0.333333	4.22881	0.0408357	NA	3.39362	-	5	85896564	85897233	+	657	pseudogene	PF09767:Predicted membrane protein (DUF2053)	-
ENSOARG00000022546	6	5	4	0	0	0	4.05509	3.03563	2.28432	0	0	0	5	0	4.86534	0.0408498	NA	2.58884	MIR378A	5	58587425	58587503	+	79	miRNA	-	-
ENSOARG00000003129	0	0	0	2	10	5	0	0	0	0.0235731	0.123297	0.0756852	0	5.66667	-4.87094	0.0409014	NA	2.75137	ADAMTSL2	3	2371399	2402064	-	3535	protein_coding	PF05986:ADAM-TS Spacer 1	-
ENSOARG00000015987	604	584	514	251	468	447	6.44074	5.59423	4.63137	2.08869	4.07391	4.77705	567.333	388.667	0.608459	0.0409855	0.736065	483.224	GCK	4	77182421	77220747	+	5007	protein_coding	PF00349:Hexokinase|PF03727:Hexokinase	-
ENSOARG00000004278	36	60	72	44	16	19	1.39892	2.09445	2.36412	1.33427	0.507547	0.739941	56	26.3333	1.17929	0.0410617	0.736065	40.5539	TBC1D12	22	15377629	15490853	+	1374	protein_coding	PF00566:Rab-GTPase-TBC domain	TBC
ENSOARG00000018823	761	692	806	674	728	436	22.9038	18.7093	20.4977	15.8301	17.8863	13.1511	753	612.667	0.404284	0.0410688	0.736065	676.05	SLC25A24	1	84794114	84956294	-	1774	protein_coding	PF00153:Mitochondrial carrier protein	Mito_carr
ENSOARG00000014970	224	173	197	337	312	260	4.40834	3.05845	3.27597	5.17556	5.01243	5.12807	198	303	-0.513853	0.0411876	0.736065	247.209	FAM20A	11	60554447	60595977	+	2713	protein_coding	PF06702:Golgi casein kinase, C-terminal, Fam20	DUF1193
ENSOARG00000014611	3	13	12	1	2	0	0.205354	0.799382	0.694081	0.0534173	0.111758	0	9.33333	1	3.3223	0.0412174	0.736065	5.08591	ADTRP	20	43584432	43652236	+	780	protein_coding	PF04750:FAR-17a/AIG1-like protein	-
ENSOARG00000008877	3	0	1	2	16	19	0.125628	0	0.0353845	0.0653577	0.546957	0.797395	1.33333	12.3333	-3.15391	0.041219	0.736065	6.99845	IRGC	14	50999706	51001028	+	1275	protein_coding	PF05049:Interferon-inducible GTPase (IIGP)	IIGP
ENSOARG00000002166	18	49	45	165	87	31	0.46608	1.13976	0.984572	3.33405	1.83897	0.804458	37.3333	94.3333	-1.20773	0.0412513	0.736065	61.8156	-	JH923063.1	12044	26398	-	2062	protein_coding	PF07686:Immunoglobulin V-set domain	V-set
ENSOARG00000000202	9	21	46	31	41	136	1.07261	2.24826	4.63237	2.88311	3.98886	16.2439	25.3333	69.3333	-1.52773	0.0412978	0.736065	48.64	-	JH922464.1	2574	3230	+	448	protein_coding	PF07686:Immunoglobulin V-set domain	V-set
ENSOARG00000001914	42	48	22	25	104	160	1.08436	1.11326	0.47995	0.503694	2.19193	4.13999	37.3333	96.3333	-1.3505	0.0413072	0.736065	68.7494	ABCG2	6	36514210	36556824	+	2068	protein_coding	PF00005:ABC transporter|PF01061:ABC-2 type transporter	ABC2_membrane
ENSOARG00000015044	2527	2688	3531	3234	2233	1675	57.2916	54.7449	67.6442	57.2171	41.3277	38.0587	2915.33	2380.67	0.3946	0.0413139	0.736065	2604.88	TLR2	17	3837859	3840213	-	2355	protein_coding	PF01582:TIR domain|PF13855:Leucine rich repeat	TIR
ENSOARG00000007604	30	60	114	153	164	91	0.315618	0.567049	1.01343	1.25612	1.40848	0.959479	68	136	-0.931504	0.0413454	0.736065	97.9985	DAPL1	2	149687026	149714670	-	5075	protein_coding	PF15228:Death-associated protein	-
ENSOARG00000005265	298	261	326	239	250	189	7.64576	6.01553	7.06755	4.78523	5.23614	4.85982	295	226	0.477053	0.0416063	0.738306	259.121	SNX8	24	40812558	40832114	+	2081	protein_coding	PF00787:PX domain	PX
ENSOARG00000001354	1077	1224	1244	1536	1784	1365	97.7947	99.8411	95.4479	108.841	132.239	124.218	1181.67	1561.67	-0.31803	0.0416159	0.738306	1353.73	COMMD3	13	22519518	22523037	+	588	protein_coding	PF07258:COMM domain	-
ENSOARG00000011155	335	446	378	612	654	409	11.5545	13.8188	11.0165	16.4724	18.4141	14.1378	386.333	558.333	-0.431389	0.0416267	0.738306	462.403	SERINC4	18	54375911	54380551	-	1548	protein_coding	PF03348:Serine incorporator (Serinc)	TMS_TDE
ENSOARG00000022176	68	44	99	127	140	118	50.4258	29.3107	62.0335	73.4934	84.7498	87.696	70.3333	128.333	-0.793593	0.0417164	0.738306	97.6166	-	1	109263096	109263167	-	72	miRNA	-	-
ENSOARG00000025805	13	16	4	39	35	29	0.973488	1.07631	0.253101	2.27904	2.13955	2.1764	11	34.3333	-1.5258	0.0418226	0.738306	22.1842	-	2	125816906	125821410	+	713	lincRNA	-	-
ENSOARG00000006423	4160	5952	4173	7835	9096	4291	63.5511	81.681	53.8672	93.4047	113.435	65.6964	4761.67	7074	-0.453992	0.0418342	0.738306	5765.07	ITGAL	24	26679858	26721693	+	3495	protein_coding	PF01839:FG-GAP repeat|PF08441:Integrin alpha|PF00092:von Willebrand factor type A domain	VWA
ENSOARG00000015236	39	23	3	8	6	2	5.46533	2.8954	0.355238	0.874867	0.686388	0.280889	21.6667	5.33333	2.22282	0.0418422	0.738306	14.0577	MAFF	3	213957264	213958416	+	381	protein_coding	PF03131:bZIP Maf transcription factor	bZIP_Maf
ENSOARG00000008300	10	7	12	27	37	23	0.495748	0.311737	0.502677	1.04454	1.49737	1.14273	9.66667	29	-1.49336	0.0419387	0.738306	18.8131	-	14	50370159	50374946	+	1077	protein_coding	PF00178:Ets-domain	Ets
ENSOARG00000013080	47	75	31	38	15	16	0.436195	0.625277	0.243103	0.275211	0.113642	0.148818	51	23	1.2727	0.0419501	0.738306	37.0568	DOCK1	22	45364051	45875506	+	5753	protein_coding	PF14604:Variant SH3 domain|PF06920:Dock homology region 2|PF16172:DOCK N-terminus|PF14429:C2 domain in Dock180 and Zizimin proteins	Ded_cyto
ENSOARG00000019642	49	96	39	46	19	22	1.64645	2.8977	1.1073	1.20618	0.521162	0.740848	61.3333	29	1.19143	0.0419677	0.738306	45.113	FAR2	3	185005628	185058440	-	1589	protein_coding	PF07993:Male sterility protein|PF03015:Male sterility protein	NAD_binding_4
ENSOARG00000011896	0	0	0	5	4	7	0	0	0	0.371351	0.310771	0.667676	0	5.33333	-4.81292	0.0419762	NA	2.64694	-	11	21905162	21908178	-	561	protein_coding	-	-
ENSOARG00000020888	100	8	27	25	14	4	0.98473	0.0707678	0.224661	0.192113	0.112541	0.0394758	45	14.3333	1.88059	0.0420694	0.738449	30.7779	BCL2L14	3	202590148	202610615	-	5422	protein_coding	-	-
ENSOARG00000019871	0	0	0	0	8	12	0	0	0	0	0.700171	1.28938	0	6.66667	-5.19879	0.0420706	NA	3.4616	C19orf84	14	56398118	56398615	-	498	protein_coding	-	-
ENSOARG00000021360	2	6	18	0	1	1	0.979671	2.64016	7.45023	0	0.399868	0.490912	8.66667	0.666667	3.68332	0.0421213	NA	4.56135	RF00001	14	48044381	48044489	-	109	rRNA	-	-
ENSOARG00000001329	4	4	1	21	14	12	0.263665	0.236854	0.0556979	1.08022	0.753332	0.792732	3	15.6667	-2.25521	0.0421539	0.738452	9.01513	-	JH921637.1	14132	16418	+	810	protein_coding	PF00129:Class I Histocompatibility antigen, domains alpha 1 and 2	MHC_I
ENSOARG00000021101	1148	1056	1510	1164	1175	613	25.3911	20.9813	28.2204	20.0906	21.215	13.5879	1238	984	0.440852	0.0423942	0.741919	1093.17	EXOC5	7	66521585	66570000	-	2414	protein_coding	PF07393:Exocyst complex component Sec10	-
ENSOARG00000004261	24	37	27	64	66	54	0.929905	1.28783	0.883971	1.93512	2.08756	2.09689	29.3333	61.3333	-0.980116	0.0424531	0.742209	44.4352	RSAD1	11	35768177	35774306	-	1378	protein_coding	PF04055:Radical SAM superfamily|PF06969:HemN C-terminal domain	Radical_SAM
ENSOARG00000000781	0	0	0	2	3	11	0	0	0	0.0780253	0.122432	0.551127	0	5.33333	-4.89179	0.04252	NA	2.80366	-	4	112022444	112026795	+	1068	protein_coding	PF00090:Thrombospondin type 1 domain	TSP_1
ENSOARG00000006631	3371	3534	5255	3654	4023	1988	25.4	23.9205	33.4576	21.4854	24.7453	15.0122	4053.33	3221.67	0.433871	0.0425645	0.743414	3569.25	TPR	12	65490680	65553961	-	7086	protein_coding	PF07926:TPR/MLP1/MLP2-like protein	-
ENSOARG00000011296	0	0	0	16	7	0	0	0	0	0.173471	0.0793909	0	0	7.66667	-5.18272	0.0425958	NA	3.40223	ZNF541	14	53550131	53565519	-	3843	protein_coding	PF01448:ELM2 domain	ELM2
ENSOARG00000003005	716	766	658	752	1398	1076	20.8104	19.9998	16.16	17.0563	33.1697	31.3425	713.333	1075.33	-0.517935	0.0430491	0.749748	889.826	VSIG10	17	56685807	56732397	+	1837	protein_coding	PF07686:Immunoglobulin V-set domain|PF07679:Immunoglobulin I-set domain	I-set
ENSOARG00000025635	1746	1338	1770	2280	2848	1742	48.3519	33.2855	41.4181	49.2725	64.3837	48.3472	1618	2290	-0.397752	0.0430555	0.749748	1921.93	-	1	254235176	254258083	+	1928	lincRNA	-	-
ENSOARG00000025623	0	0	0	6	3	7	0	0	0	0.292732	0.153111	0.438602	0	5.33333	-4.80946	0.0432189	NA	2.64023	-	1	240235977	240237423	-	854	lincRNA	-	-
ENSOARG00000014563	0	0	0	6	3	7	0	0	0	0.164469	0.0860243	0.246425	0	5.33333	-4.80946	0.0432189	NA	2.64023	ANKS4B	24	19017948	19028504	+	1520	protein_coding	PF12796:Ankyrin repeats (3 copies)|PF00536:SAM domain (Sterile alpha motif)	SAM_1
ENSOARG00000017557	1418	863	1267	1088	1056	592	26.0709	14.2534	19.6836	15.6102	15.8493	10.9083	1182.67	912	0.500236	0.0433355	0.753875	1039.59	SPECC1	11	33080584	33150143	-	2904	protein_coding	PF00307:Calponin homology (CH) domain	CH
ENSOARG00000004385	31	0	2	2	0	0	1.98698	0	0.10832	0.100037	0	0	11	0.666667	4.32666	0.0435262	0.755081	6.38654	-	10	76056955	76062040	-	833	protein_coding	PF00096:Zinc finger, C2H2 type	zf-C2H2
ENSOARG00000009981	2726	2535	2624	2783	2347	1417	36.5971	30.5723	29.7668	29.1564	25.7218	19.0653	2628.33	2182.33	0.38911	0.0435342	0.755081	2376.49	TBC1D1	6	57171635	57399713	+	3977	protein_coding	PF00566:Rab-GTPase-TBC domain|PF11830:Domain of unknown function (DUF3350)|PF00640:Phosphotyrosine interaction domain (PTB/PID)	TBC
ENSOARG00000025179	79	71	70	64	38	18	18.4999	14.9358	13.8512	11.6956	7.26427	4.22443	73.3333	40	1.01835	0.0436137	0.755712	56.1867	-	6	88745633	88746821	+	228	protein_coding	-	-
ENSOARG00000013476	1308	1114	1740	1195	1370	738	15.8468	12.124	17.8127	11.298	13.5494	8.96073	1387.33	1101	0.436279	0.0437765	0.757783	1226.67	UHRF1BP1L	3	169123582	169207038	-	4407	protein_coding	PF12624:N-terminal region of Chorein or VPS13	-
ENSOARG00000003530	61	37	56	35	27	16	3.14678	1.71462	2.44102	1.40898	1.13702	0.827199	51.3333	26	1.10629	0.0440033	0.76064	38.6351	RHBDD3	17	68079950	68083028	-	1035	protein_coding	PF00627:UBA/TS-N domain|PF01694:Rhomboid family	Rhomboid
ENSOARG00000005613	1665	1727	2184	3029	2966	1724	22.7768	21.2226	25.2451	32.3354	33.1219	23.6357	1858.67	2573	-0.364581	0.0440325	0.76064	2161.37	TRAF1	2	2563277	2584501	+	3903	protein_coding	PF16673:TNF receptor-associated factor BIRC3 binding domain	-
ENSOARG00000001077	2986	3060	3798	3248	2817	2497	77.3175	71.1768	83.0979	65.6303	59.5445	64.7978	3281.33	2854	0.285541	0.0442345	0.762696	3039.66	RALBP1	23	41973772	41997876	+	2062	protein_coding	PF00620:RhoGAP domain	RhoGAP
ENSOARG00000017120	0	0	0	17	0	5	0	0	0	0.218953	0	0.0827039	0	7.33333	-5.1845	0.0442808	NA	3.41367	TMEM132B	17	49885384	50186678	-	3235	protein_coding	PF15706:Mature oligodendrocyte transmembrane protein, TMEM132D, C-term|PF15705:Mature oligodendrocyte transmembrane protein, TMEM132D, N-term|PF16070:Transmembrane protein family 132	-
ENSOARG00000014657	67	74	31	17	28	33	4.14515	4.11269	1.62059	0.820758	1.41413	2.04613	57.3333	26	1.21147	0.0443353	0.763684	42.7121	ANKRD22	22	10242923	10272413	-	863	protein_coding	PF13857:Ankyrin repeats (many copies)|PF12796:Ankyrin repeats (3 copies)	-
ENSOARG00000017021	131	155	133	269	254	150	1.85576	1.97247	1.59202	2.97374	2.93732	2.12959	139.667	224.333	-0.572162	0.0445228	0.766159	177.434	WDR35	3	27685445	27737169	-	3769	protein_coding	PF12894:Anaphase-promoting complex subunit 4 WD40 domain	-
ENSOARG00000015183	324	480	611	365	456	181	7.59062	10.1019	12.0954	6.67307	8.72095	4.24976	471.667	334	0.598903	0.0445975	0.766692	394.032	BCLAF3	X	17362297	17402662	-	2279	protein_coding	PF15440:THRAP3/BCLAF1 family	-
ENSOARG00000008189	196	252	469	112	225	212	17.4414	20.1444	35.2651	7.77756	16.3446	18.9067	305.667	183	0.763186	0.0447259	0.767392	243.136	-	8	15590257	15710072	-	600	protein_coding	PF02827:cAMP-dependent protein kinase inhibitor	-
ENSOARG00000011578	91	277	189	90	142	98	0.848529	2.32024	1.48913	0.65489	1.08089	0.915809	185.667	110	0.814523	0.0448079	0.767539	146.37	TICRR	18	20124948	20166662	+	5726	protein_coding	PF15292:Treslin N-terminus	-
ENSOARG00000005716	1	7	0	20	13	17	0.0579718	0.364539	0	0.904789	0.615215	0.987688	2.66667	16.6667	-2.56797	0.0448516	0.767539	9.43632	-	24	26506332	26507999	-	921	protein_coding	PF02749:Quinolinate phosphoribosyl transferase, N-terminal domain|PF01729:Quinolinate phosphoribosyl transferase, C-terminal domain	-
ENSOARG00000014860	752	794	1225	819	866	474	9.03687	8.57136	12.4389	7.68041	8.49542	5.70864	923.667	719.667	0.45625	0.0449231	0.767539	806.962	ZNF518A	22	16741189	16745631	+	4443	protein_coding	-	-
ENSOARG00000003625	1825	1861	1936	1817	1704	1402	37.0778	33.9646	33.2356	28.8076	28.261	28.5465	1874	1641	0.283831	0.044964	0.767539	1744.99	WWP2	14	36178361	36304003	+	2628	protein_coding	PF00632:HECT-domain (ubiquitin-transferase)|PF00397:WW domain	HECT
ENSOARG00000010363	25	49	43	48	97	99	1.0469	1.84328	1.52153	1.56858	3.31593	4.15485	39	81.3333	-1.02919	0.0449767	0.767539	59.9608	VIPR2	4	119039321	119101756	-	1275	protein_coding	PF00002:7 transmembrane receptor (Secretin family)|PF02793:Hormone receptor domain	7tm_2
ENSOARG00000000002	74	112	116	134	220	154	4.12423	5.60735	5.46281	5.82795	10.0092	8.60172	100.667	169.333	-0.68356	0.0450242	0.767539	132.776	-	MT	69	1026	+	958	Mt_rRNA	-	-
ENSOARG00000004966	561	679	676	634	518	436	29.923	32.5343	30.4675	26.3896	22.5548	23.3068	638.667	529.333	0.362257	0.0451396	0.767539	578.176	DNASE1L1	X	77224908	77227743	+	1001	protein_coding	-	-
ENSOARG00000007331	49	84	91	160	128	102	2.55739	3.9383	4.01319	6.5166	5.45353	5.33525	74.6667	130	-0.718176	0.0451828	0.767539	99.5151	TMUB2	11	43427454	43428635	+	1023	protein_coding	PF00240:Ubiquitin family	ubiquitin
ENSOARG00000020210	189	103	71	35	84	70	9.5289	4.66495	3.02472	1.37705	3.45722	3.53698	121	63	1.04064	0.045226	0.767539	94.7165	TMEM198	2	220448093	220452572	+	1059	protein_coding	PF13886:Domain of unknown function (DUF4203)	-
ENSOARG00000017937	494	581	501	779	699	694	16.9619	17.9205	14.5355	20.873	19.5925	23.8814	525.333	724	-0.380862	0.0452602	0.767539	618.561	ZNF3	24	36287233	36293732	+	1555	protein_coding	PF00096:Zinc finger, C2H2 type|PF01352:KRAB box	KRAB
ENSOARG00000021181	323	306	378	523	468	420	9.00085	7.66005	8.90061	11.3732	10.6462	11.7296	335.667	470.333	-0.401106	0.0453441	0.768219	397.374	EXD2	7	77913941	77946337	+	1916	protein_coding	PF01612:3'-5' exonuclease	3_5_exonuc
ENSOARG00000000687	543	712	912	952	1051	996	24.4657	28.8182	34.7216	33.4731	38.657	44.975	722.333	999.667	-0.41085	0.0454969	0.768391	849.923	-	12	79084614	79091698	-	1185	protein_coding	PF00102:Protein-tyrosine phosphatase	Y_phosphatase
ENSOARG00000010950	19	23	9	8	4	1	0.749778	0.815334	0.300102	0.246359	0.128856	0.0395487	17	4.33333	2.14223	0.0455297	0.768391	10.785	PTK6	13	53455206	53461499	+	1353	protein_coding	PF00017:SH2 domain|PF00018:SH3 domain|PF07714:Protein tyrosine kinase	Pkinase_Tyr
ENSOARG00000027056	1	7	0	18	22	11	0.00990944	0.0623126	0	0.139194	0.177967	0.109243	2.66667	17	-2.56333	0.0455794	0.768489	9.39745	-	8	90488039	90493525	+	5388	lincRNA	PF00008:EGF-like domain	EGF
ENSOARG00000017554	7693	6744	8583	6354	8098	4904	48.5687	38.2478	45.7874	31.3046	41.7354	31.0288	7673.33	6452	0.348879	0.0457058	0.768949	6999.15	UBR5	9	74663681	74756461	+	8457	protein_coding	PF11547:E3 ubiquitin ligase EDD|PF00658:Poly-adenylate binding protein, unique domain|PF00632:HECT-domain (ubiquitin-transferase)	HECT
ENSOARG00000001397	229	87	27	88	47	16	3.25787	1.11185	0.32457	0.976969	0.545836	0.228124	114.333	50.3333	1.41405	0.0457555	0.768949	84.5424	ADGRG6	8	66712507	66862248	+	3753	protein_coding	PF00431:CUB domain|PF01825:GPCR proteolysis site, GPS, motif|PF00354:Pentaxin family|PF00002:7 transmembrane receptor (Secretin family)	7tm_2
ENSOARG00000006197	679	1176	1198	1404	1440	1414	10.3848	16.1571	15.4821	16.7569	17.9786	21.6735	1017.67	1419.33	-0.423748	0.0458335	0.768949	1201.62	RGS3	2	10082703	10235603	-	3491	protein_coding	PF00595:PDZ domain (Also known as DHR or GLGF)|PF00168:C2 domain|PF00615:Regulator of G protein signaling domain	RGS
ENSOARG00000008869	9078	6381	8028	6601	7839	4860	116.991	73.8719	87.421	66.3853	82.4687	62.7699	7829	6433.33	0.39413	0.0459304	0.768949	7097.1	-	24	27259119	27265626	+	4143	protein_coding	-	-
ENSOARG00000000662	21	27	18	55	43	51	0.810726	0.936369	0.587183	1.65698	1.35516	1.97323	22	49.6667	-1.09494	0.0459534	0.768949	35.3946	KREMEN2	24	2354639	2358305	+	1383	protein_coding	PF01822:WSC domain|PF00051:Kringle domain|PF00431:CUB domain	CUB
ENSOARG00000019400	129	258	169	289	352	247	2.38572	4.28626	2.64097	4.17088	5.31422	4.57805	185.333	296	-0.594301	0.0460885	0.768949	236.007	RAPGEF3	3	138618569	138645274	+	2887	protein_coding	PF00027:Cyclic nucleotide-binding domain|PF00617:RasGEF domain|PF00610:Domain found in Dishevelled, Egl-10, and Pleckstrin (DEP)|PF00618:RasGEF N-terminal motif	cNMP_binding
ENSOARG00000018426	222	561	354	280	323	169	4.95943	11.2582	6.68234	4.88132	5.89044	3.78372	379	257.333	0.652607	0.046089	0.768949	313.077	ZNF184	20	30152364	30170695	+	2390	protein_coding	PF00096:Zinc finger, C2H2 type|PF01352:KRAB box	KRAB
ENSOARG00000019193	145	167	385	591	199	481	1.37121	1.41867	3.0764	4.36138	1.53623	4.55863	232.333	423.667	-0.831667	0.0461635	0.768949	322.248	-	2	210980871	211103075	-	5646	protein_coding	PF03868:Ribosomal protein L6, N-terminal domain|PF01159:Ribosomal protein L6e	-
ENSOARG00000004743	1366	1729	1729	1507	1269	1291	25.7534	29.2824	27.5439	22.1716	19.5304	24.3929	1608	1355.67	0.321583	0.0461673	0.768949	1472.27	ATP6AP1	X	77185295	77193890	-	2832	protein_coding	PF05827:Vacuolar ATP synthase subunit S1 (ATP6S1)	-
ENSOARG00000016177	2831	1489	2657	2142	1993	1209	85.7849	40.5316	68.0314	50.6513	49.2997	36.7156	2325.67	1781.33	0.506642	0.0462058	0.768949	2039.48	RALGPS2	12	58253669	58366453	+	1762	protein_coding	PF00617:RasGEF domain|PF00169:PH domain	PH
ENSOARG00000000498	195	101	106	98	102	44	1.41345	0.65765	0.649229	0.554334	0.603548	0.319633	134	81.3333	0.873669	0.0462212	0.768949	108.109	ITGA9	19	10846322	11213039	+	7366	protein_coding	PF01839:FG-GAP repeat|PF08441:Integrin alpha	FG-GAP
ENSOARG00000015177	892	551	548	618	470	402	27.4342	15.2232	14.2415	14.8325	11.8003	12.391	663.667	496.667	0.541949	0.0462406	0.768949	582.188	IFIT1	22	10811884	10820333	+	1736	protein_coding	-	-
ENSOARG00000008710	4766	4324	4639	4310	4546	3022	44.1093	35.9493	36.2783	31.1282	34.3457	28.0301	4576.33	3959.33	0.314256	0.046266	0.768949	4233.1	EIF4G3	2	244462688	244728718	+	5769	protein_coding	PF02847:MA3 domain|PF02854:MIF4G domain|PF02020:eIF4-gamma/eIF5/eIF2-epsilon	-
ENSOARG00000000429	13	19	21	45	26	60	0.416875	0.547324	0.569021	1.1261	0.680616	1.92827	17.6667	43.6667	-1.27698	0.0465089	0.770192	30.6631	MROH6	9	14078157	14082347	+	1665	protein_coding	-	-
ENSOARG00000014800	937	617	409	510	461	420	34.5261	20.4231	12.7344	14.6649	13.8668	15.51	654.333	463.667	0.618303	0.046582	0.770192	565.926	IFIT3	22	10793261	10794709	+	1449	protein_coding	-	-
ENSOARG00000007830	0	18	14	2	0	0	0	0.264826	0.193747	0.0255617	0	0	10.6667	0.666667	4.10917	0.0466469	0.770192	5.52184	ANKRD29	23	33275725	33329932	+	3260	protein_coding	PF12796:Ankyrin repeats (3 copies)	-
ENSOARG00000007541	2007	2040	2001	2261	1420	1310	83.8481	76.5605	70.6382	73.7134	48.4285	54.8493	2016	1663.67	0.383465	0.046729	0.770192	1823.46	-	X	526361	549772	+	1278	protein_coding	PF09240:Interleukin-6 receptor alpha chain, binding	-
ENSOARG00000015462	530	733	682	967	969	706	13.2978	16.5211	14.4589	18.9335	19.847	17.7527	648.333	880.667	-0.352943	0.0467613	0.770192	750.218	COQ10B	2	198685880	198703534	+	2128	protein_coding	PF03364:Polyketide cyclase / dehydrase and lipid transport	-
ENSOARG00000014639	2	6	23	48	19	39	0.0501099	0.135043	0.486932	0.938501	0.388609	0.97929	10.3333	35.3333	-1.76426	0.0467758	0.770192	22.196	-	24	938134	942423	+	2131	protein_coding	PF00520:Ion transport protein	Ion_trans
ENSOARG00000005250	2	36	0	0	0	2	0.0665322	1.0758	0	0	0	0.0666784	12.6667	0.666667	4.18175	0.0467787	0.770192	6.78422	-	2	709822	725442	+	1605	protein_coding	PF03098:Animal haem peroxidase	An_peroxidase
ENSOARG00000003594	59	44	46	29	27	22	2.55485	1.71157	1.68313	0.979968	0.95443	0.954751	49.6667	26	1.03911	0.0469253	0.770192	38.1021	FOXD2	1	21705590	21707439	+	1233	protein_coding	PF00250:Forkhead domain	Fork_head
ENSOARG00000016535	449	403	572	433	396	307	8.7143	7.02619	9.38056	6.55804	6.27405	5.97143	474.667	378.667	0.41704	0.0469554	0.770192	422.553	NFXL1	6	66574549	66628435	-	2751	protein_coding	PF01422:NF-X1 type zinc finger	zf-NF-X1
ENSOARG00000006736	47	43	17	76	104	62	1.21522	0.998743	0.371409	1.53345	2.19511	1.60658	35.6667	80.6667	-1.05167	0.0470192	0.770516	57.1927	ST6GALNAC1	11	54124802	54141515	+	2065	protein_coding	PF00777:Glycosyltransferase family 29 (sialyltransferase)	Glyco_transf_29
ENSOARG00000014830	2784	3628	2999	3438	2518	1920	123.561	144.646	112.469	119.074	91.2291	85.4016	3137	2625.33	0.363436	0.0470955	0.770539	2845.43	-	6	3796404	3840343	+	1203	protein_coding	PF00191:Annexin	-
ENSOARG00000006400	312	684	311	627	803	670	13.1895	25.9752	11.1091	20.6843	27.7112	28.3858	435.667	700	-0.610829	0.0471317	0.770539	561.114	SH2D2A	1	105335557	105343737	-	1263	protein_coding	PF00017:SH2 domain	SH2
ENSOARG00000012000	323	560	527	724	769	531	14.5902	22.7235	20.1148	25.521	28.3565	24.0385	470	674.667	-0.439941	0.0471865	0.770539	559.487	-	21	42597646	42614252	-	1182	protein_coding	PF09666:Sororin protein	-
ENSOARG00000003775	125	134	95	113	54	52	2.95834	2.84886	1.8998	2.08697	1.04327	1.23337	118	73	0.81593	0.0472613	0.770539	95.2154	FOLH1	21	5307124	5378337	-	2256	protein_coding	PF02225:PA domain|PF04389:Peptidase family M28|PF04253:Transferrin receptor-like dimerisation domain	TFR_dimer
ENSOARG00000012171	873	1136	972	1371	1478	1134	27.306	31.9191	25.6895	33.4642	37.7385	35.5476	993.667	1327.67	-0.330582	0.0472901	0.770539	1144.08	FANCG	2	53079030	53084363	+	1707	protein_coding	-	-
ENSOARG00000013856	17159	22360	17271	16136	17493	14649	760.926	890.74	647.164	558.401	633.259	651.046	18930	16092.7	0.318699	0.0473284	0.770539	17435.4	-	20	27544969	27577813	+	1204	protein_coding	PF00129:Class I Histocompatibility antigen, domains alpha 1 and 2|PF07654:Immunoglobulin C1-set domain	MHC_I
ENSOARG00000003365	3189	4080	2812	3284	3092	1907	80.1635	92.1321	59.7289	64.4207	63.4495	48.0426	3360.33	2761	0.398237	0.0474526	0.77076	3029.89	FGR	2	238569799	238580414	+	2124	protein_coding	PF00018:SH3 domain|PF00017:SH2 domain|PF07714:Protein tyrosine kinase	Pkinase_Tyr
ENSOARG00000007186	778	894	1064	903	728	657	26.2407	27.0871	30.3238	23.7675	20.0444	22.2083	912	762.667	0.341415	0.0474642	0.77076	828.523	RWDD4	26	13102726	13111286	-	1583	protein_coding	PF05773:RWD domain	RWD
ENSOARG00000007280	23	74	97	87	101	219	0.87841	2.53881	3.13032	2.59292	3.14889	8.38238	64.6667	135.667	-1.10178	0.047507	0.77076	101.018	-	17	68936119	68958818	+	1398	protein_coding	PF00650:CRAL/TRIO domain	-
ENSOARG00000016611	1486	201	123	265	107	47	256.766	31.1992	17.9585	35.7326	15.0928	8.13897	603.333	139.667	2.37164	0.0475431	0.77076	393.915	CXCL10	6	90551375	90552865	-	309	protein_coding	PF00048:Small cytokines (intecrine/chemokine), interleukin-8 like	-
ENSOARG00000019372	110	125	214	116	105	74	4.32165	4.4116	7.10424	3.55644	3.36754	2.91368	149.667	98.3333	0.686694	0.0475687	0.77076	122.032	VDR	3	138499404	138532443	+	1359	protein_coding	PF00104:Ligand-binding domain of nuclear hormone receptor|PF00105:Zinc finger, C4 type (two domains)	zf-C4
ENSOARG00000013877	146	180	167	126	112	112	1.38878	1.53809	1.34229	0.935303	0.869694	1.06771	164.333	116.667	0.572922	0.0476322	0.77076	140.168	IFT88	10	36045326	36103818	-	5613	protein_coding	PF12895:Anaphase-promoting complex, cyclosome, subunit 3|PF13424:Tetratricopeptide repeat	-
ENSOARG00000019174	438	260	216	422	3142	380	20.955	11.1742	8.73199	15.7552	122.711	18.2201	304.667	1314.67	-1.94128	0.04765	0.77076	771.336	-	15	47609516	47611599	+	1116	protein_coding	PF00042:Globin	-
ENSOARG00000005004	205	251	405	215	264	88	4.49317	4.94199	7.50069	3.67738	4.72357	1.93302	287	189	0.710019	0.0477859	0.772244	232.359	FCHO2	16	8561901	8677459	-	2436	protein_coding	PF00611:Fes/CIP4, and EFC/F-BAR homology domain|PF10291:Muniscin C-terminal mu homology domain	-
ENSOARG00000012408	2188	2409	2444	3300	3072	2596	55.3921	54.7855	52.2815	65.195	63.4875	65.8656	2347	2989.33	-0.260505	0.0478507	0.772579	2632.86	PARP12	4	103243956	103287653	-	2109	protein_coding	PF02825:WWE domain|PF00644:Poly(ADP-ribose) polymerase catalytic domain	WWE
ENSOARG00000009740	1210	556	976	808	758	442	38.7317	15.9876	26.3984	20.1833	19.8069	14.1794	914	669.333	0.580454	0.0479588	0.773612	789.037	EIF2AK2	3	86846562	86871162	+	1668	protein_coding	PF00069:Protein kinase domain|PF00035:Double-stranded RNA binding motif	Pkinase
ENSOARG00000026477	96	37	120	65	43	22	1.87684	0.649809	1.98236	0.991673	0.686262	0.431054	84.3333	43.3333	1.08996	0.0480353	0.773871	63.206	-	18	67971879	67983427	-	2731	lincRNA	-	-
ENSOARG00000015038	0	20	9	61	85	3	0	0.993021	0.420329	2.63105	3.83517	0.166178	9.66667	49.6667	-2.22848	0.0480632	0.773871	27.205	SDR16C5	9	36264636	36276508	-	966	protein_coding	PF00106:short chain dehydrogenase	adh_short
ENSOARG00000007077	77	91	22	118	313	58	11.7128	12.4348	2.82774	14.0072	38.867	8.84201	63.3333	163	-1.19912	0.0481188	0.774054	108.897	SH3BGRL2	8	6486667	6506925	+	351	protein_coding	PF04908:SH3-binding, glutamic acid-rich protein	-
ENSOARG00000019291	331	560	475	680	599	681	19.3145	29.3543	23.4205	30.9645	28.5331	39.825	455.333	653.333	-0.460909	0.0482289	0.775103	548.417	PRR5	3	219297104	219314560	+	915	protein_coding	PF08539:HbrB-like	-
ENSOARG00000017139	365	402	419	417	282	227	19.1623	18.9588	18.5873	17.0841	12.0857	11.9436	395.333	308.667	0.461743	0.0483093	0.775103	347.894	SCAMP1	7	9272393	9359760	+	1017	protein_coding	PF04144:SCAMP family	-
ENSOARG00000019349	383	124	158	170	113	116	12.3039	3.57846	4.28894	4.26182	2.9634	3.73471	221.667	133	0.877141	0.0483368	0.775103	180.853	CSF1	1	86382849	86393572	+	1662	protein_coding	PF05337:Macrophage colony stimulating factor-1 (CSF-1)	-
ENSOARG00000020673	2937	3985	3696	3680	2893	2551	219.625	267.692	233.538	214.747	176.601	191.18	3539.33	3041.33	0.306985	0.0485937	0.775103	3254.26	ITM2C	2	231740173	231752466	+	714	protein_coding	PF04089:BRICHOS domain	-
ENSOARG00000017649	529	961	873	1029	1094	1275	11.652	19.015	16.2482	17.6872	19.6711	28.1454	787.667	1132.67	-0.480157	0.0486254	0.775103	952.81	CCNG2	6	91655059	91663290	+	2424	protein_coding	PF00134:Cyclin, N-terminal domain	-
ENSOARG00000014018	35	15	0	4	3	0	0.961772	0.370275	0	0.0857757	0.0672964	0	16.6667	2.33333	3.08868	0.0486714	0.775103	10.0817	-	22	9096079	9165623	+	1943	protein_coding	PF01583:Adenylylsulphate kinase|PF14306:PUA-like domain	-
ENSOARG00000004688	6	27	44	14	3	0	0.0804501	0.325213	0.498511	0.146489	0.032837	0	25.6667	5.66667	2.31243	0.0486947	0.775103	15.0963	-	18	33669383	33675133	-	3982	protein_coding	PF00089:Trypsin	Trypsin
ENSOARG00000008494	1707	1808	2040	2850	2477	1904	88.5717	84.273	89.4413	115.4	104.919	99.0106	1851.67	2410.33	-0.284672	0.048715	0.775103	2092.92	-	19	49530241	49701797	+	1029	protein_coding	PF14204:Ribosomal L18 C-terminal region|PF17144:Ribosomal large subunit proteins 60S L5, and 50S L18	-
ENSOARG00000010842	10	28	23	51	30	68	0.7294	1.83465	1.41756	2.90293	1.7863	4.97082	20.3333	49.6667	-1.26991	0.0487895	0.775551	34.9088	ZC3HAV1L	4	102431825	102441354	-	732	protein_coding	-	-
ENSOARG00000018974	125	110	160	222	186	211	4.1505	3.28104	4.48908	5.75233	5.04162	7.02145	131.667	206.333	-0.578087	0.0489069	0.775551	167.191	ZNF398	4	111627140	111646630	+	1608	protein_coding	PF12417:Zinc finger protein|PF01352:KRAB box	KRAB
ENSOARG00000022385	34	21	37	19	8	10	24.2044	13.4296	22.2569	10.5553	4.64913	7.13459	30.6667	12.3333	1.41877	0.0489598	0.775551	21.5638	RF00049	3	2558774	2558848	-	75	snoRNA	-	-
ENSOARG00000001060	16	44	23	123	111	12	0.20765	0.512972	0.252224	1.24571	1.17599	0.15608	27.6667	82	-1.4095	0.0489721	0.775551	51.1167	KDR	6	70562488	70607422	-	4114	protein_coding	PF07679:Immunoglobulin I-set domain|PF00047:Immunoglobulin domain|PF07714:Protein tyrosine kinase|PF13927:Immunoglobulin domain	Pkinase_Tyr
ENSOARG00000024075	3	8	21	1	3	0	1.72232	4.12584	10.1873	0.448016	1.40599	0	10.6667	1.33333	3.08194	0.0490573	0.775619	5.82134	RF00134	2	207200241	207200333	+	93	snoRNA	-	-
ENSOARG00000012758	0	0	0	5	8	3	0	0	0	0.243658	0.407819	0.187752	0	5.33333	-4.74135	0.0493138	NA	2.51035	TLX2	3	96302645	96304041	+	855	protein_coding	PF00046:Homeobox domain	Homeobox
ENSOARG00000002147	124	294	137	226	335	409	2.95036	6.28391	2.75436	4.19626	6.50677	9.75283	185	323.333	-0.76888	0.0493332	0.777372	254.526	PIK3R6	11	27862277	27890086	-	2244	protein_coding	PF10486:Phosphoinositide 3-kinase gamma adapter protein p101 subunit	-
ENSOARG00000023199	173	231	196	122	103	166	124.822	149.722	119.494	68.6918	60.6665	120.035	200	130.333	0.664524	0.0493851	0.777372	166.462	-	11	26645506	26645579	+	74	miRNA	-	-
ENSOARG00000017694	520	909	659	1027	998	924	19.6767	30.8988	21.0708	30.3264	30.8281	35.0409	696	983	-0.424695	0.0494604	0.777372	828.127	CLDND1	1	161272046	161278658	-	1411	protein_coding	PF13903:PMP-22/EMP/MP20/Claudin tight junction	-
ENSOARG00000011076	197	282	343	388	389	429	13.382	17.2081	19.6877	20.5677	21.571	29.2055	274	402	-0.502124	0.0494654	0.777372	334.264	CD40LG	X	93416451	93428217	-	786	protein_coding	PF00229:TNF(Tumour Necrosis Factor) family	-
ENSOARG00000015208	1	4	11	0	0	0	0.0477141	0.171449	0.443492	0	0	0	5.33333	0	4.87381	0.0495079	NA	2.5946	ABRA	9	70486510	70496619	+	1119	protein_coding	PF14705:Costars	-
ENSOARG00000004630	75	87	76	115	319	70	1.92335	2.00421	1.64686	2.30141	6.6781	1.79907	79.3333	168	-0.954477	0.0495213	0.777372	119.101	SEC14L5	24	4042050	4076185	+	2082	protein_coding	PF00650:CRAL/TRIO domain|PF03765:CRAL/TRIO, N-terminal domain|PF04707:PRELI-like family	MSF1
ENSOARG00000021136	4197	4063	6123	4264	4873	2603	71.7766	62.4194	88.482	56.9064	68.031	44.614	4794.33	3913.33	0.392489	0.0495232	0.777372	4282.58	HIF1A	7	70762392	70807563	+	3122	protein_coding	PF08778:HIF-1 alpha C terminal transactivation domain|PF11413:Hypoxia-inducible factor-1|PF08447:PAS fold	-
ENSOARG00000013448	1242	1414	1183	1060	1133	1008	34.0066	34.7792	27.3699	22.649	25.3244	27.6603	1279.67	1067	0.346206	0.0498827	0.780457	1171.28	POR	24	34100684	34126780	+	1950	protein_coding	PF00258:Flavodoxin|PF00667:FAD binding domain	-
ENSOARG00000007906	8336	7076	6490	7793	5886	4631	77.9605	59.4474	51.2871	56.875	44.9369	43.4055	7300.67	6103.33	0.376814	0.0499033	0.780457	6665.55	-	20	7346814	7357333	-	5709	protein_coding	PF00969:Class II histocompatibility antigen, beta domain|PF07654:Immunoglobulin C1-set domain	C1-set
ENSOARG00000003099	1462	2973	2879	3164	3895	3307	14.4154	26.3331	23.9865	24.3453	31.3511	32.6788	2438	3455.33	-0.448684	0.0499743	0.780457	2899.33	RASAL3	5	7471517	7485044	+	5415	protein_coding	PF00616:GTPase-activator protein for Ras-like GTPase	-
ENSOARG00000012897	0	2	0	3	4	19	0	0.0216488	0	0.0282096	0.0393461	0.229447	0.666667	8.66667	-3.7582	0.0499834	0.780457	4.93149	-	17	62534598	62555425	+	4431	protein_coding	PF13499:EF-hand domain pair	-
ENSOARG00000007809	336	434	658	768	811	511	8.28243	9.61029	13.7054	14.7734	16.3195	12.6239	476	696.667	-0.468129	0.049987	0.780457	570.56	ARNTL	15	38890197	38925292	-	2166	protein_coding	PF00989:PAS fold|PF00010:Helix-loop-helix DNA-binding domain|PF14598:PAS domain	HLH
ENSOARG00000013143	42	145	87	163	144	202	0.558522	1.73216	0.977591	1.69153	1.56322	2.69213	91.3333	169.667	-0.859699	0.0502302	0.783006	129.362	LAMB3	12	71807820	71847698	+	4015	protein_coding	PF00053:Laminin EGF domain|PF00055:Laminin N-terminal (Domain VI)	Laminin_EGF
ENSOARG00000000343	9	41	11	45	33	89	0.411411	1.68363	0.424887	1.60526	1.23144	4.07734	20.3333	55.6667	-1.44988	0.0502397	0.783006	38.5115	DOK4	14	24899696	24905785	-	1168	protein_coding	PF02174:PTB domain (IRS-1 type)	-
ENSOARG00000018407	14	26	42	14	9	7	1.90201	3.17312	4.82148	1.48427	0.998144	0.953094	27.3333	10	1.52454	0.0504488	0.784176	18.3267	-	3	165532313	165532705	-	393	protein_coding	PF00410:Ribosomal protein S8	-
ENSOARG00000008067	760	687	853	686	735	493	30.3955	24.682	28.8265	21.4102	23.9966	19.7604	766.667	638	0.363236	0.0505997	0.784176	695.911	SNX18	16	24648771	24650573	-	1335	protein_coding	PF10456:WASP-binding domain of Sorting nexin protein|PF00787:PX domain	PX
ENSOARG00000018923	4	16	21	2	5	0	0.0841814	0.302486	0.373441	0.0328463	0.0858999	0	13.6667	2.33333	2.65231	0.0506202	0.784176	7.80058	PAMR1	15	64153397	64233464	-	2537	protein_coding	PF00431:CUB domain|PF00089:Trypsin|PF00084:Sushi repeat (SCR repeat)|PF00008:EGF-like domain	Trypsin
ENSOARG00000015227	89	110	87	74	272	209	1.3573	1.50697	1.12112	0.880677	3.38626	3.19436	95.3333	185	-0.903654	0.0506215	0.784176	140.109	LTBP3	21	43027943	43042714	-	3501	protein_coding	PF07645:Calcium-binding EGF domain|PF00683:TB domain	EGF_CA
ENSOARG00000004495	522	597	674	534	539	423	5.21532	5.35813	5.69006	4.16343	4.39608	4.2355	597.667	498.667	0.345917	0.0506703	0.784176	543.025	HELLS	22	15498817	15537211	+	5344	protein_coding	PF00271:Helicase conserved C-terminal domain|PF00176:SNF2 family N-terminal domain	SNF2_N
ENSOARG00000007188	2981	3371	3240	3173	2955	2405	77.9059	79.14	71.5484	64.7111	63.0423	62.9908	3197.33	2844.33	0.260569	0.0507004	0.784176	2995.7	RAD23B	2	15747740	15772752	-	2043	protein_coding	PF00627:UBA/TS-N domain|PF09280:XPC-binding domain|PF00240:Ubiquitin family	UBA
ENSOARG00000007425	2805	5139	5535	4677	3471	2383	57.1185	94.0051	95.2376	74.321	57.6986	48.6319	4493	3510.33	0.447101	0.0507177	0.784176	3915.92	-	13	52521878	52564322	-	2622	protein_coding	PF07686:Immunoglobulin V-set domain|PF07654:Immunoglobulin C1-set domain	V-set
ENSOARG00000013525	323	197	145	167	170	105	7.21575	3.95343	2.73712	2.91136	3.10023	2.35083	221.667	147.333	0.729513	0.0507908	0.784615	186.064	PDCD1LG2	2	73089606	73143766	+	2390	protein_coding	-	-
ENSOARG00000012672	13589	14248	16708	15594	11529	11504	606.136	570.907	629.729	542.801	419.798	514.263	14848.3	12875.7	0.290572	0.0510372	0.787726	13744	ANXA1	2	62999570	63011634	-	1197	protein_coding	PF00191:Annexin	-
ENSOARG00000006142	1440	1256	1425	1425	1220	815	23.7738	18.6275	19.8792	18.3591	16.4423	13.4849	1373.67	1153.33	0.365445	0.0512281	0.789045	1250.39	IFIH1	2	146343186	146404420	+	3234	protein_coding	PF16739:Caspase recruitment domain|PF04851:Type III restriction enzyme, res subunit|PF00271:Helicase conserved C-terminal domain|PF11648:C-terminal domain of RIG-I	Helicase_C
ENSOARG00000006894	45	102	63	100	138	146	4.02453	8.19467	4.76091	6.97915	10.0751	13.0861	70	128	-0.824231	0.0512549	0.789045	98.3558	-	5	9761627	9762240	+	597	protein_coding	-	-
ENSOARG00000018291	529	608	593	532	527	388	24.8849	25.6929	23.5712	19.5296	20.2376	18.2922	576.667	482.333	0.351737	0.0512577	0.789045	524.723	AAGAB	7	13809656	13881272	-	1135	protein_coding	PF10199:Alpha and gamma adaptin binding protein p34	-
ENSOARG00000012916	387	290	473	279	360	224	35.6869	24.0229	36.8558	20.0772	27.0999	20.7014	383.333	287.667	0.50747	0.0515183	0.791877	332.949	-	5	68005199	68029041	-	579	protein_coding	PF16422:Transcription factor COE1 DNA-binding domain	-
ENSOARG00000001599	1105	1145	1017	1068	934	772	62.6308	58.2988	48.7072	47.2386	43.2155	43.8527	1089	924.667	0.335746	0.0515321	0.791877	1001.13	SFXN4	22	38276026	38291689	-	942	protein_coding	PF03820:Tricarboxylate carrier	-
ENSOARG00000021537	18	0	20	3	0	1	10.5611	0	9.91544	1.37359	0	0.588016	12.6667	1.33333	3.37223	0.0515907	0.791941	7.13861	RF00611	14	995515	995605	-	91	snoRNA	-	-
ENSOARG00000023002	0	0	0	9	4	3	0	0	0	1.32039	0.613882	0.56524	0	5.33333	-4.72662	0.0516262	NA	2.48351	RF00100	1	97748693	97748976	-	284	misc_RNA	-	-
ENSOARG00000020223	1	3	12	0	0	0	0.0941659	0.253772	0.95482	0	0	0	5.33333	0	4.86858	0.0516585	NA	2.58482	-	3	183011132	183011698	-	567	protein_coding	PF13499:EF-hand domain pair	-
ENSOARG00000014689	40	79	34	39	13	18	2.64645	4.69525	1.90077	2.01358	0.702123	1.19352	51	23.3333	1.23767	0.0516713	0.791941	37.1107	TPSB2	24	953067	954303	+	807	protein_coding	PF00089:Trypsin	Trypsin
ENSOARG00000017418	1204	804	697	896	737	387	48.9224	29.3472	23.931	28.4112	24.4464	15.7596	901.667	673.333	0.571941	0.0517219	0.792014	784.811	-	13	57854973	57864452	+	1314	protein_coding	-	-
ENSOARG00000018901	195	97	98	106	91	27	15.6328	6.98559	6.63858	6.63145	5.95539	2.1693	130	74.6667	0.979084	0.0518529	0.793327	102.489	PPIC	5	28246200	28259561	+	666	protein_coding	PF00160:Cyclophilin type peptidyl-prolyl cis-trans isomerase/CLD	Pro_isomerase
ENSOARG00000010373	4879	4899	5547	7726	7234	4987	77.9007	70.2662	74.8368	96.2643	94.2878	79.8001	5108.33	6649	-0.278555	0.0520426	0.795534	5769.45	MICAL1	8	27816425	27825784	+	3344	protein_coding	PF12130:Protein of unknown function (DUF3585)|PF00307:Calponin homology (CH) domain|PF01494:FAD binding domain	CH
ENSOARG00000003131	0	0	0	7	14	0	0	0	0	0.310606	0.649839	0	0	7	-5.07425	0.0521225	NA	3.15744	-	14	60431226	60433703	+	939	protein_coding	PF03402:Vomeronasal organ pheromone receptor family, V1R	-
ENSOARG00000006252	405	448	400	596	652	487	15.6016	15.5032	13.0203	17.9168	20.5035	18.8017	417.667	578.333	-0.37608	0.0524224	0.80019	491.188	RRNAD1	1	105265589	105272147	+	1386	protein_coding	PF13679:Methyltransferase domain	-
ENSOARG00000016267	15	72	40	19	22	11	0.654315	2.82135	1.47435	0.646769	0.783402	0.480885	42.3333	17.3333	1.37078	0.0524649	0.80019	29.3724	OXER1	3	81302289	81303512	+	1224	protein_coding	PF00001:7 transmembrane receptor (rhodopsin family)	7tm_1
ENSOARG00000003649	59	105	9	148	190	101	3.32292	5.31235	0.428309	6.50474	8.73552	5.7009	57.6667	146.333	-1.21157	0.0524842	0.80019	99.4739	-	2	7992787	7993734	-	948	processed_pseudogene	PF07541:Eukaryotic translation initiation factor 2 alpha subunit|PF00575:S1 RNA binding domain	S1
ENSOARG00000017898	17	12	18	43	64	19	2.29208	1.45342	2.05069	4.52429	7.04414	2.56737	15.6667	42	-1.29256	0.0526266	0.801293	27.6113	-	4	82645824	82646344	+	396	protein_coding	PF07686:Immunoglobulin V-set domain	V-set
ENSOARG00000006503	877	935	926	1363	1597	870	43.9257	42.0688	39.1902	53.274	65.2967	43.6709	912.667	1276.67	-0.37561	0.0527222	0.801293	1071.54	NT5C3A	4	63747905	63790190	+	1066	protein_coding	PF05822:Pyrimidine 5'-nucleotidase (UMPH-1)	-
ENSOARG00000014206	0	2	0	10	6	9	0	0.0815696	0	0.354299	0.222376	0.409511	0.666667	8.33333	-3.58351	0.0527331	NA	4.39045	RAB3IL1	21	39823142	39833187	-	1176	protein_coding	PF06428:GDP/GTP exchange factor Sec2p	-
ENSOARG00000011583	24	28	12	34	71	51	0.713877	0.748168	0.301606	0.789208	1.724	1.52032	21.3333	52	-1.1965	0.0527395	0.801293	36.383	TGFB2	12	19934865	20025740	+	1795	protein_coding	PF00688:TGF-beta propeptide|PF00019:Transforming growth factor beta like domain	TGFb_propeptide
ENSOARG00000017970	222	425	193	606	522	290	11.2245	19.3032	8.2455	23.9103	21.5452	14.6948	280	472.667	-0.635451	0.0528123	0.801704	365.358	-	4	82734605	82755780	+	1056	protein_coding	PF07654:Immunoglobulin C1-set domain|PF07686:Immunoglobulin V-set domain	V-set
ENSOARG00000016860	389	535	463	602	737	588	14.1578	17.4916	14.2388	17.0979	21.8968	21.4475	462.333	642.333	-0.397084	0.0530181	0.802231	545.453	POLM	4	77272659	77280796	+	1467	protein_coding	PF14716:Helix-hairpin-helix domain|PF14791:DNA polymerase beta thumb|PF10391:Fingers domain of DNA polymerase lambda|PF14792:DNA polymerase beta palm	-
ENSOARG00000004832	10	11	2	37	27	18	1.10543	1.09232	0.186813	3.19177	2.43646	1.99414	7.66667	27.3333	-1.68898	0.0530416	0.802231	16.9038	PI3	13	73049210	73050568	+	483	protein_coding	PF00095:WAP-type (Whey Acidic Protein) 'four-disulfide core'|PF10511:Trappin protein transglutaminase binding domain	-
ENSOARG00000016007	1356	1523	1513	1424	1183	1166	163.062	164.521	153.737	133.63	116.13	140.523	1464	1257.67	0.302417	0.0531377	0.802231	1353.16	UBE2L3	17	71369986	71384401	-	444	protein_coding	PF00179:Ubiquitin-conjugating enzyme	UQ_con
ENSOARG00000018946	908	1531	2068	1318	1288	852	24.9511	37.7927	48.0177	28.2631	28.8926	23.4637	1502.33	1152.67	0.458177	0.0532152	0.802231	1300.57	STXBP3	1	85263000	85308932	+	1943	protein_coding	PF00995:Sec1 family	Sec1
ENSOARG00000014096	448	513	581	782	804	526	21.5492	22.1666	23.6144	29.3536	31.5701	25.3567	514	704	-0.358765	0.053415	0.802231	596.303	TM6SF1	18	22597463	22620825	+	1110	protein_coding	PF10914:Protein of unknown function (DUF2781)	-
ENSOARG00000007203	1379	3167	2832	3733	3153	3774	58.9493	121.616	102.295	124.53	110.028	161.685	2459.33	3553.33	-0.485686	0.0534657	0.802231	2965.96	SKAP1	11	37604886	37911404	+	1249	protein_coding	PF00169:PH domain|PF00018:SH3 domain	PH
ENSOARG00000012162	8	8	17	28	37	26	0.206048	0.185096	0.369976	0.562776	0.777939	0.671126	11	30.3333	-1.39688	0.0535195	0.802231	20.1038	ABLIM2	6	113703808	113823694	-	2073	protein_coding	PF16182:Putative adherens-junction anchoring region of AbLIM|PF02209:Villin headpiece domain|PF00412:LIM domain	LIM
ENSOARG00000004572	54	73	63	130	95	103	13.536	16.438	13.344	25.4297	19.4396	25.8755	63.3333	109.333	-0.706931	0.0535337	0.802231	84.9549	-	4	14338474	14340585	+	213	protein_coding	-	-
ENSOARG00000002932	1020	861	1274	1175	787	509	9.95247	7.54679	10.5038	8.94682	6.26862	4.97739	1051.67	823.667	0.469973	0.0535348	0.802231	922.313	ADCY9	24	3273039	3376048	-	5472	protein_coding	PF00211:Adenylate and Guanylate cyclase catalytic domain	Guanylate_cyc
ENSOARG00000007399	352	733	649	524	452	324	5.17314	9.67707	8.0594	6.00956	5.42271	4.7721	578	433.333	0.499239	0.0536096	0.802231	496.974	SMC2	2	18870300	18918858	-	3633	protein_coding	PF06470:SMC proteins Flexible Hinge Domain|PF02463:RecF/RecN/SMC N terminal domain	SMC_N
ENSOARG00000019563	782	2043	1942	2167	2316	2652	25.6308	60.1524	53.7838	55.4261	61.967	87.113	1589	2378.33	-0.55021	0.0536285	0.802231	1959.9	CERK	3	221089606	221106314	-	1629	protein_coding	PF00781:Diacylglycerol kinase catalytic domain	-
ENSOARG00000020647	126	93	134	59	92	73	2.48519	1.64778	2.23326	0.908115	1.4813	1.443	117.667	74.6667	0.733618	0.0536362	0.802231	96.5273	MAP4K5	7	40391715	40504372	-	2707	protein_coding	PF00780:CNH domain|PF00069:Protein kinase domain	CNH
ENSOARG00000010118	1067	514	413	429	535	403	20.769	8.98758	6.79278	6.51641	8.50102	7.86157	664.667	455.667	0.674031	0.053695	0.802231	569.817	VWA5A	21	26281420	26309140	+	2743	protein_coding	PF13768:von Willebrand factor type A domain|PF08487:Vault protein inter-alpha-trypsin domain	-
ENSOARG00000015922	1519	1925	2050	2725	2178	2276	50.5312	57.5256	57.6239	70.7405	59.1461	75.88	1831.33	2393	-0.312375	0.0537406	0.802231	2084.68	ICAM3	5	12546272	12554248	-	1605	protein_coding	PF03921:Intercellular adhesion molecule (ICAM), N-terminal domain	-
ENSOARG00000010370	190	200	142	117	97	138	8.60432	8.1362	5.43373	4.13475	3.58592	6.26319	177.333	117.333	0.66746	0.0537507	0.802231	149.029	SLX4IP	13	3335314	3402092	+	1179	protein_coding	PF15744:Uncharacterized protein family UPF0492	-
ENSOARG00000015263	4507	5141	4646	5533	3084	3089	228.309	233.944	198.867	218.724	127.531	156.822	4764.67	3902	0.393391	0.0537512	0.802231	4290.79	CTSB	2	104431014	104438581	-	1054	protein_coding	PF08127:Peptidase family C1 propeptide|PF00112:Papain family cysteine protease	Peptidase_C1
ENSOARG00000016188	1937	2375	2141	1987	1762	1767	66.0411	72.7407	61.6806	52.8668	49.0408	60.3775	2151	1838.67	0.304866	0.0538239	0.802231	1986.26	BIN1	2	117267199	117314475	+	1566	protein_coding	PF14604:Variant SH3 domain|PF03114:BAR domain	-
ENSOARG00000016894	114	68	193	100	74	49	2.02283	1.08391	2.89373	1.3847	1.0719	0.871373	125	74.3333	0.848025	0.0538281	0.802231	98.1683	SEMA3C	4	39952749	40157229	+	3009	protein_coding	PF01403:Sema domain	Sema
ENSOARG00000013232	407	1120	935	1173	1268	1289	7.85632	19.421	15.2505	17.6694	19.9807	24.9362	820.667	1243.33	-0.556341	0.0538518	0.802231	1016.7	-	10	34418398	34473964	+	2766	protein_coding	PF00169:PH domain|PF00621:RhoGEF domain	RhoGEF
ENSOARG00000011565	1278	1266	1315	1034	1098	1079	24.696	21.9765	21.4718	15.5925	17.3207	20.8964	1286.33	1070.33	0.341066	0.0538605	0.802231	1178.14	LIG1	14	53929950	53953550	-	2763	protein_coding	PF01068:ATP dependent DNA ligase domain|PF04679:ATP dependent DNA ligase C terminal region|PF04675:DNA ligase N terminus	DNA_ligase_A_M
ENSOARG00000014467	106	313	229	380	579	203	3.03787	8.05818	5.54557	8.4986	13.5459	5.8306	216	387.333	-0.744691	0.0539003	0.802231	290.117	EOMES	19	2017142	2022076	-	1863	protein_coding	PF00907:T-box|PF16176:T-box transcription factor-associated	T-box
ENSOARG00000013726	889	1153	827	860	887	609	29.6104	34.4986	23.2753	22.3533	24.1176	20.3289	956.333	785.333	0.386238	0.0540901	0.803735	864.249	AGK	4	104558438	104651956	+	1603	protein_coding	PF00781:Diacylglycerol kinase catalytic domain	-
ENSOARG00000009563	6	6	8	20	21	23	0.190007	0.170686	0.21407	0.494253	0.542881	0.729963	6.66667	21.3333	-1.61649	0.0542074	0.804069	13.8053	STS	X	4590785	4676708	+	1686	protein_coding	PF14707:C-terminal region of aryl-sulfatase|PF00884:Sulfatase	Sulfatase
ENSOARG00000020105	24	13	8	0	6	3	0.845815	0.411563	0.238232	0	0.172616	0.105959	15	3	2.42932	0.0542844	0.80453	9.39361	ILDR1	1	184743764	184775412	-	1515	protein_coding	PF05624:Lipolysis stimulated receptor (LSR)	-
ENSOARG00000003429	212	227	266	366	422	248	5.76623	5.5464	6.11343	7.76851	9.36991	6.76023	235	345.333	-0.457189	0.0543718	0.805086	283.701	ZFP90	14	35224419	35245612	+	1963	protein_coding	PF00096:Zinc finger, C2H2 type|PF01352:KRAB box	KRAB
ENSOARG00000026506	24	0	7	1	2	0	0.797392	0	0.19652	0.0259275	0.0542447	0	10.3333	1	3.59106	0.0544138	0.805086	6.03061	-	9	14862110	14872992	+	1607	lincRNA	-	-
ENSOARG00000006008	73	80	43	166	88	118	2.20578	2.1715	1.09788	3.91425	2.17065	3.57335	65.3333	124	-0.821523	0.0545443	0.806275	93.4967	KLHL14	23	24667797	24780463	+	1767	protein_coding	PF01344:Kelch motif|PF07707:BTB And C-terminal Kelch|PF00651:BTB/POZ domain	BTB
ENSOARG00000009833	367	361	417	442	236	147	8.11047	7.16664	7.78686	7.62258	4.25754	3.25575	381.667	275	0.604138	0.0546491	0.806275	322.763	MITF	19	31583798	31811540	-	2416	protein_coding	PF00010:Helix-loop-helix DNA-binding domain|PF11851:Domain of unknown function (DUF3371)|PF15951:MITF/TFEB/TFEC/TFE3 N-terminus	HLH
ENSOARG00000013677	240	384	225	502	484	320	7.55994	10.8659	5.98875	12.3399	12.4457	10.1021	283	435.333	-0.516573	0.0549278	0.807721	351.523	IL4I1	14	55264896	55273197	-	1695	protein_coding	PF01593:Flavin containing amine oxidoreductase	Amino_oxidase
ENSOARG00000004778	652	680	829	967	991	903	52.8249	49.4913	56.7535	61.1389	65.5438	73.3217	720.333	953.667	-0.329862	0.0549287	0.807721	827.433	-	4	93696646	93792408	-	659	protein_coding	PF00179:Ubiquitin-conjugating enzyme	UQ_con
ENSOARG00000026894	5	11	4	24	20	23	0.212717	0.420392	0.143794	0.796791	0.694592	0.980651	6.66667	22.3333	-1.66914	0.0549608	0.807721	14.2567	-	14	6045605	6068346	-	1255	lincRNA	-	-
ENSOARG00000018927	45	88	48	115	175	67	1.48311	2.60539	1.33675	2.95774	4.70832	2.21304	60.3333	119	-0.867238	0.0551968	0.808591	86.7203	XK	X	34936462	35012680	+	1620	protein_coding	PF09815:XK-related protein|PF05147:Lanthionine synthetase C-like protein	-
ENSOARG00000015937	147	399	290	423	358	579	15.0357	36.6613	25.064	33.7634	29.8921	59.3524	278.667	453.333	-0.677697	0.0552969	0.808591	364.582	TMEM204	24	1186017	1196777	+	522	protein_coding	-	-
ENSOARG00000005169	46	230	56	176	302	216	1.26145	5.66588	1.29761	3.76638	6.76058	5.93633	110.667	231.333	-1.00037	0.0554669	0.809724	168.088	CD93	13	40981178	40983359	-	1947	protein_coding	PF12662:Complement Clr-like EGF-like|PF07645:Calcium-binding EGF domain|PF00059:Lectin C-type domain	EGF_CA
ENSOARG00000019976	359	376	417	533	585	455	9.85995	9.27677	9.6775	11.4237	13.116	12.5241	384	524.333	-0.363535	0.055567	0.810089	447.832	GLB1L	2	220162608	220169126	-	1944	protein_coding	PF01301:Glycosyl hydrolases family 35	-
ENSOARG00000011364	435	481	548	421	325	398	23.0412	22.8871	24.5269	17.402	14.0529	21.1277	488	381.333	0.42372	0.0555844	0.810089	433.644	ZDHHC3	19	54127209	54151582	+	1008	protein_coding	PF01529:DHHC palmitoyltransferase	-
ENSOARG00000008765	97	97	163	304	225	105	14.8823	13.369	21.1316	36.3975	28.1804	16.1451	119	211.333	-0.711087	0.0557287	0.811517	158.383	-	20	25939960	25940307	-	348	protein_coding	PF01248:Ribosomal protein L7Ae/L30e/S12e/Gadd45 family	-
ENSOARG00000019953	11	14	15	35	25	41	0.503267	0.57539	0.579888	1.24961	0.933711	1.87994	13.3333	33.6667	-1.2872	0.0558069	0.811981	23.3446	HTR1B	8	4223342	4224508	-	1167	protein_coding	PF00001:7 transmembrane receptor (rhodopsin family)	7tm_1
ENSOARG00000005435	128	214	191	282	334	202	4.16211	6.25095	5.24788	7.15571	8.86577	6.58277	177.667	272.667	-0.529594	0.0559454	0.813321	219.744	-	19	52432762	52436873	-	1642	protein_coding	PF00531:Death domain	Death
ENSOARG00000000707	14	32	33	54	56	57	1.68353	3.45679	3.35316	5.06743	5.49729	6.86945	26.3333	55.6667	-1.03073	0.0560854	0.814145	40.2556	S100A1	1	102635347	102639148	+	444	protein_coding	PF00036:EF hand|PF01023:S-100/ICaBP type calcium binding domain	efhand
ENSOARG00000016062	1366	2770	2957	3549	3691	2767	37.0033	67.406	67.6843	75.0233	81.6208	75.1195	2364.33	3335.67	-0.429288	0.0561222	0.814145	2783.9	CD6	21	36499871	36566511	+	1971	protein_coding	PF00530:Scavenger receptor cysteine-rich domain	SRCR
ENSOARG00000017639	301	700	332	320	349	261	6.32468	13.2129	5.89463	5.24713	5.98638	5.49625	444.333	310	0.603977	0.0561491	0.814145	374.625	LDLR	5	13205377	13238124	+	2541	protein_coding	PF00058:Low-density lipoprotein receptor repeat class B|PF14670:Coagulation Factor Xa inhibitory site|PF07645:Calcium-binding EGF domain|PF00057:Low-density lipoprotein receptor domain class A	Ldl_recept_a
ENSOARG00000010906	0	14	0	11	23	47	0	0.110514	0	0.0754313	0.164988	0.413914	4.66667	27	-2.55779	0.056188	0.814145	16.2391	TDRD6	20	19966586	19977113	+	6076	protein_coding	PF00567:Tudor domain	-
ENSOARG00000018220	24	7	0	2	0	1	0.382625	0.100251	0	0.0248824	0	0.0159777	10.3333	1	3.55646	0.0562905	0.814956	6.12653	CPED1	4	85512508	85837877	+	3349	protein_coding	PF12733:Cadherin-like beta sandwich domain	-
ENSOARG00000008988	6081	5346	5960	5554	5688	4009	88.3475	69.7713	73.1665	62.9688	67.4599	58.3726	5795.67	5083.67	0.291971	0.0564681	0.816259	5398.33	PLCG2	14	7791499	7885593	+	3675	protein_coding	PF00018:SH3 domain|PF00387:Phosphatidylinositol-specific phospholipase C, Y domain|PF00388:Phosphatidylinositol-specific phospholipase C, X domain|PF00017:SH2 domain|PF00168:C2 domain	PI-PLC-X
ENSOARG00000002758	13	99	24	153	132	59	0.384328	2.6292	0.599538	3.5298	3.18566	1.74809	45.3333	114.667	-1.22856	0.0564737	0.816259	76.2976	CLHC1	3	68709081	68740523	+	1806	protein_coding	PF15739:Translin-associated factor X-interacting N-terminus|PF13838:Clathrin-H-link	-
ENSOARG00000016432	794	1061	758	1239	1208	1141	23.8835	28.6697	19.2661	29.0837	29.6628	34.3968	871	1196	-0.375272	0.0566998	0.818631	1023.83	ATG12	7	4458675	4478599	-	1775	protein_coding	PF04110:Ubiquitin-like autophagy protein Apg12	-
ENSOARG00000001949	1476	1336	1561	1510	1323	904	12.605	10.2493	11.2644	10.0632	9.22325	7.73713	1457.67	1245.67	0.334833	0.0567948	0.818631	1336.73	ARHGAP26	5	51190660	51671936	+	6252	protein_coding	PF16746:BAR domain of APPL family|PF00169:PH domain|PF00620:RhoGAP domain|PF14604:Variant SH3 domain	RhoGAP
ENSOARG00000002400	801	616	1015	751	754	226	6.32929	4.37252	6.77697	4.63087	4.86363	1.78972	810.667	577	0.628772	0.0567963	0.818631	679.754	CCDC88A	3	68546298	68659018	+	6757	protein_coding	PF05622:HOOK protein	-
ENSOARG00000004578	101	49	99	147	159	134	2.92758	1.27589	2.42476	3.3251	3.76228	3.89265	83	146.667	-0.729717	0.0568247	0.818631	113.412	PABPC1L	13	72870429	72894436	+	1842	protein_coding	PF00076:RNA recognition motif. (a.k.a. RRM, RBD, or RNP domain)|PF00658:Poly-adenylate binding protein, unique domain	RRM_1
ENSOARG00000016610	63339	45681	46648	47590	44266	38216	3196.41	2070.88	1989.17	1874.16	1823.59	1932.81	51889.3	43357.3	0.365277	0.056959	0.819892	47670	HLA-DRA	20	25774090	25783626	-	1058	protein_coding	PF07654:Immunoglobulin C1-set domain|PF00993:Class II histocompatibility antigen, alpha domain	C1-set
ENSOARG00000015128	125	34	138	48	38	62	15.3425	3.74882	14.3124	4.59758	3.80748	7.62663	99	49.3333	1.06263	0.0571303	0.820388	75.1784	-	1	229717779	229718213	+	435	protein_coding	PF08152:GUCT (NUC152) domain	-
ENSOARG00000014710	1738	911	1824	1343	1213	886	40.7534	19.1894	36.1398	24.5748	23.2189	20.821	1491	1147.33	0.484719	0.0571332	0.820388	1311.32	SGK1	8	59319492	59324974	-	2277	protein_coding	PF00433:Protein kinase C terminal domain|PF00069:Protein kinase domain	Pkinase
ENSOARG00000020269	0	0	1	4	7	7	0	0	0.1446	0.534173	0.977883	1.20053	0.333333	6	-4.01195	0.0571704	NA	3.11677	-	3	199979779	199980090	+	312	protein_coding	PF15511:Centromere kinetochore component CENP-T histone fold	-
ENSOARG00000025938	17	17	13	50	34	31	0.645566	0.579921	0.41714	1.4817	1.05399	1.1798	15.6667	38.3333	-1.18261	0.0571818	0.820388	26.3446	-	3	1797576	1804422	+	1406	lincRNA	-	-
ENSOARG00000010703	25	39	49	104	89	40	0.486267	0.68144	0.805336	1.57858	1.41316	0.779737	37.6667	77.6667	-0.935896	0.057182	0.820388	55.1622	ATP2C2	14	10104811	10163451	+	2745	protein_coding	PF00702:haloacid dehalogenase-like hydrolase|PF00122:E1-E2 ATPase|PF00689:Cation transporting ATPase, C-terminus|PF00690:Cation transporter/ATPase, N-terminus	E1-E2_ATPase
ENSOARG00000010806	250	738	656	727	845	1007	5.94037	15.7528	13.1712	13.4806	16.3907	23.9804	548	859.667	-0.625409	0.0572276	0.820388	697.029	UBASH3A	1	260769711	260809438	+	2247	protein_coding	PF14604:Variant SH3 domain|PF00300:Histidine phosphatase superfamily (branch 1)	-
ENSOARG00000019023	0	0	0	0	27	0	0	0	0	0	4.00276	0	0	9	-5.45617	0.0573079	NA	4.11996	PRLH	1	3403499	3404266	-	294	protein_coding	-	-
ENSOARG00000002207	432	624	495	804	698	633	33.5741	43.5646	32.5066	48.7614	44.2835	49.3034	517	711.667	-0.376682	0.0573894	0.820986	605.37	CLTB	5	35336446	35355119	-	687	protein_coding	PF01086:Clathrin light chain	-
ENSOARG00000008341	166	341	256	357	552	296	23.0809	42.5921	30.0768	38.7359	62.6543	41.2468	254.333	401.667	-0.575042	0.057409	0.820986	320.154	MTURN	4	66135817	66165145	-	384	protein_coding	PF15167:Domain of unknown function (DUF4581)	-
ENSOARG00000001195	190	723	503	561	721	1111	2.2015	7.52543	4.92469	5.07256	6.81971	12.9013	472	797.667	-0.756785	0.0574212	0.820986	635.447	-	20	15113736	15150602	+	4608	protein_coding	PF00211:Adenylate and Guanylate cyclase catalytic domain	Guanylate_cyc
ENSOARG00000003959	304	445	583	724	748	459	10.9081	14.3437	17.6762	20.2727	21.91	16.5059	444	643.667	-0.451101	0.0576207	0.820986	528.852	RASGEF1A	25	13514772	13523914	-	1488	protein_coding	PF00618:RasGEF N-terminal motif|PF00617:RasGEF domain	-
ENSOARG00000014726	1150	1278	1418	1286	1169	911	35.9701	35.909	37.4771	31.3895	29.8486	28.5572	1282	1122	0.283618	0.0576394	0.820986	1188.78	TGFBR2	19	5059654	5110073	+	1707	protein_coding	PF07714:Protein tyrosine kinase|PF08917:Transforming growth factor beta receptor 2 ectodomain	Pkinase_Tyr
ENSOARG00000026373	41	26	47	70	100	57	1.24238	0.707739	1.20342	1.65527	2.47364	1.73101	38	75.6667	-0.896128	0.057657	0.820986	55.5417	-	11	40159758	40312440	-	1762	lincRNA	-	-
ENSOARG00000025638	503	719	525	633	400	324	25.6752	32.9688	22.6439	25.2144	16.6675	16.5746	582.333	452.333	0.47385	0.0578413	0.822455	511.157	-	1	261789777	261885079	-	1046	lincRNA	-	-
ENSOARG00000020495	873	486	326	438	377	353	9.39743	4.69959	2.96524	3.67933	3.31286	3.80823	561.667	389.333	0.657862	0.0579536	0.82265	483.082	RTP4	1	198138027	198223956	-	4960	protein_coding	PF13695:Zinc-binding domain	-
ENSOARG00000011852	2	5	2	11	8	23	0.0280126	0.0629104	0.0236701	0.120231	0.0914704	0.322853	3	14	-2.21293	0.0579959	0.82265	8.64772	-	14	54207061	54222715	-	3812	protein_coding	PF07714:Protein tyrosine kinase	Pkinase_Tyr
ENSOARG00000012457	1327	2280	3371	1808	1197	1890	114.461	176.665	245.692	121.698	84.2843	163.381	2326	1631.67	0.540515	0.0580528	0.822752	1961.52	-	17	70213916	70214983	-	619	protein_coding	PF07686:Immunoglobulin V-set domain	V-set
ENSOARG00000000156	3672	4619	5224	4212	4246	3414	91.1463	102.994	109.569	81.5877	86.0365	84.9285	4505	3957.33	0.265975	0.058097	0.822752	4184.16	PRKCD	19	47735253	47762970	-	2151	protein_coding	PF00130:Phorbol esters/diacylglycerol binding domain (C1 domain)|PF00433:Protein kinase C terminal domain|PF00069:Protein kinase domain	Pkinase
ENSOARG00000020859	0	0	0	0	9	9	0	0	0	0	0.554838	0.681167	0	6	-5.01902	0.0581052	NA	3.05397	IL37	3	59952933	59960245	-	707	protein_coding	PF00340:Interleukin-1 / 18	-
ENSOARG00000014389	8	2	7	0	1	0	2.09381	0.470224	1.54807	0	0.213655	0	5.66667	0.333333	4.08301	0.0581119	NA	3.08492	GNG13	24	626650	627033	-	204	protein_coding	-	-
ENSOARG00000018728	138	110	163	213	263	168	2.41182	1.72698	2.40713	2.90499	3.75222	2.94258	137	214.667	-0.553753	0.0581764	0.823185	172.495	-	12	78545091	78548204	+	3055	protein_coding	-	-
ENSOARG00000026044	51	60	102	55	43	21	1.96464	2.07632	3.32017	1.65339	1.35222	0.810749	71	39.6667	0.942763	0.0582729	0.823185	54.1864	-	3	179334843	179355619	+	1386	lincRNA	-	-
ENSOARG00000019941	161	110	196	320	401	122	0.588493	0.361191	0.605367	0.912779	1.19654	0.446919	155.667	281	-0.720136	0.058445	0.823185	210.071	RYR3	7	25720183	26191936	-	14607	protein_coding	PF08454:RyR and IP3R Homology associated|PF01365:RIH domain|PF02815:MIR domain|PF00520:Ion transport protein|PF00622:SPRY domain|PF08709:Inositol 1,4,5-trisphosphate/ryanodine receptor|PF02026:RyR domain|PF06459:Ryanodine Receptor TM 4-6	SPRY
ENSOARG00000007394	30	20	8	3	0	9	0.286746	0.171725	0.0646119	0.0223768	0	0.0862128	19.3333	4	2.29614	0.0585374	0.823185	12.3287	ARHGEF17	15	50996826	51052556	+	5586	protein_coding	PF00621:RhoGEF domain	RhoGEF
ENSOARG00000014804	1472	1351	1314	1367	1089	1044	90.3369	74.4803	68.1396	65.4676	54.5572	64.2113	1379	1166.67	0.337721	0.0585976	0.823185	1269.07	C19orf66	5	12332399	12336477	+	870	protein_coding	PF15135:Uncharacterised protein UPF0515	-
ENSOARG00000007414	228	567	352	619	475	705	12.8006	28.5962	16.6988	27.1198	21.7699	39.6679	382.333	599.667	-0.606576	0.0586506	0.823185	487.626	-	4	98109027	98125539	-	951	protein_coding	PF00248:Aldo/keto reductase family	Aldo_ket_red
ENSOARG00000026090	219	253	272	435	499	219	8.84483	9.17898	9.28241	13.7099	16.4518	8.86427	248	384.333	-0.517593	0.0586542	0.823185	306.714	-	21	6805482	6809351	+	1322	lincRNA	-	-
ENSOARG00000004700	672	555	695	719	474	307	21.7057	16.1037	18.9686	18.1231	12.4982	9.93793	640.667	500	0.482634	0.0586761	0.823185	562.668	-	16	6875413	6908793	+	1653	protein_coding	PF00728:Glycosyl hydrolase family 20, catalytic domain|PF14845:beta-acetyl hexosaminidase like	Glyco_hydro_20
ENSOARG00000010734	696	842	745	654	612	619	33.1202	35.9935	29.9562	24.2863	23.774	29.5208	761	628.333	0.353326	0.0587385	0.823185	693.012	-	11	39301396	39307994	+	1122	protein_coding	PF04516:CP2 transcription factor	CP2
ENSOARG00000001925	131	90	98	176	208	144	22.8574	14.1067	14.4487	23.9645	29.6268	25.1809	106.333	176	-0.61911	0.0589154	0.825004	139.298	C1orf189	1	103074410	103077234	-	306	protein_coding	PF15104:Domain of unknown function (DUF4558)	-
ENSOARG00000003153	28	16	13	31	66	45	0.494698	0.25394	0.194076	0.427409	0.951903	0.796798	19	47.3333	-1.21309	0.058963	0.825011	32.9529	LMAN1L	18	32763425	32776397	-	3022	protein_coding	PF03388:Legume-like lectin family	-
ENSOARG00000025701	77	126	67	133	129	220	1.09079	1.60343	0.801996	1.47029	1.49179	3.12339	90	160.667	-0.796822	0.0590357	0.825369	126.238	-	17	70495492	70501242	-	3769	lincRNA	PF00413:Matrixin	-
ENSOARG00000010438	581	1008	971	692	693	638	73.859	115.111	104.302	68.6489	71.9163	81.2834	853.333	674.333	0.40367	0.0591616	0.825659	756.561	SNRNP25	24	54677	56520	+	420	protein_coding	-	-
ENSOARG00000006635	98	76	35	16	65	4	4.0656	2.83231	1.22691	0.517986	2.20129	0.166307	69.6667	28.3333	1.48381	0.0591702	0.825659	49.5428	-	24	10151409	10169901	-	1287	protein_coding	PF01347:Lipoprotein amino terminal region|PF09172:Domain of unknown function (DUF1943)	Vitellogenin_N
ENSOARG00000014317	45	117	93	155	133	153	0.702938	1.6418	1.22754	1.88945	1.69599	2.39524	85	147	-0.739559	0.0592527	0.825659	114.177	ST5	15	43361529	43421022	+	3418	protein_coding	PF03456:uDENN domain|PF02141:DENN (AEX-3) domain|PF03455:dDENN domain	DENN
ENSOARG00000001821	424	689	660	791	868	780	7.0944	10.3561	9.33127	10.3282	11.8559	13.0797	591	813	-0.39581	0.0592872	0.825659	692.335	THAP9	6	97334785	97356066	+	3191	protein_coding	PF05485:THAP domain|PF12017:Transposase protein	THAP
ENSOARG00000025590	22	0	6	0	2	0	0.183966	0	0.0423949	0	0.0136525	0	9.33333	0.666667	4.01515	0.0593864	0.825659	5.35396	-	1	171108018	171136794	+	6385	lincRNA	-	-
ENSOARG00000020393	2759	4050	3474	4505	1549	1374	23.7825	31.361	25.3036	30.304	10.8999	11.8699	3427.67	2476	0.598896	0.059508	0.826361	2892.4	-	3	150160411	150294070	-	6194	protein_coding	PF00062:C-type lysozyme/alpha-lactalbumin family	-
ENSOARG00000015110	303	425	297	481	455	571	19.3978	24.4415	16.0662	24.0301	23.7787	36.6354	341.667	502.333	-0.494221	0.0595469	0.826361	420.898	-	18	24803059	24804151	-	834	protein_coding	PF11627:Nuclear factor hnRNPA1|PF00076:RNA recognition motif. (a.k.a. RRM, RBD, or RNP domain)	RRM_1
ENSOARG00000019055	320	305	226	475	493	320	17.7419	15.1907	10.5878	20.5515	22.3133	17.7809	283.667	429.333	-0.481664	0.0595784	0.826361	350.779	-	12	61956632	61994026	+	963	protein_coding	PF00701:Dihydrodipicolinate synthetase family	-
ENSOARG00000000918	0	0	0	1	8	6	0	0	0	0.0593526	0.496702	0.457346	0	5	-4.72328	0.0597361	NA	2.48704	TFPI2	4	11085935	11089573	-	702	protein_coding	PF00014:Kunitz/Bovine pancreatic trypsin inhibitor domain	Kunitz_BPTI
ENSOARG00000021222	0	1	2	6	3	17	0	0.159345	0.299769	0.830542	0.434408	3.02213	1	8.66667	-3.18037	0.0597771	0.828462	4.99122	RF00100	7	15461273	15461573	-	301	misc_RNA	-	-
ENSOARG00000005672	15	55	33	156	50	44	0.441987	1.45583	0.821636	3.5871	1.20269	1.29935	34.3333	83.3333	-1.16349	0.0598398	0.828675	55.8363	B4GALNT1	3	161750765	161756373	+	1812	protein_coding	PF00535:Glycosyl transferase family 2	Glycos_transf_2
ENSOARG00000002053	0	5	5	22	16	11	0	0.162037	0.152416	0.619352	0.471196	0.397705	3.33333	16.3333	-2.22666	0.059904	0.82876	9.33325	EFEMP1	3	68110961	68179006	+	1480	protein_coding	PF07645:Calcium-binding EGF domain|PF12662:Complement Clr-like EGF-like	EGF_CA
ENSOARG00000008748	246	276	329	198	219	223	19.4584	19.6115	21.9895	12.2219	14.1411	17.6779	283.667	213.333	0.474112	0.0599406	0.82876	248.055	NTMT1	3	6842416	6844489	-	675	protein_coding	PF05891:AdoMet dependent proline di-methyltransferase	-
ENSOARG00000010921	32	22	44	256	35	16	0.607375	0.37511	0.705678	3.79181	0.542302	0.304355	32.6667	102.333	-1.46235	0.0600333	0.829102	62.2784	HBM	24	147873	150952	+	2813	protein_coding	PF00042:Globin	-
ENSOARG00000021926	9	2	28	2	4	1	4.80529	0.959258	12.6323	0.833311	1.74342	0.535094	13	2.33333	2.55327	0.06006	0.829102	7.52429	-	15	13371393	13371492	-	100	miRNA	-	-
ENSOARG00000001235	253	157	161	119	177	93	9.02351	5.03018	4.85208	3.31209	5.15341	3.32423	190.333	129.667	0.677554	0.060185	0.82952	160.658	TRMT2B	X	125293807	125332540	-	1497	protein_coding	-	-
ENSOARG00000021058	4	29	0	77	47	19	0.230885	1.5037	0	3.46837	2.21462	1.09911	11	47.6667	-1.96987	0.0604283	0.832219	27.5622	KLRF1	3	204898283	204908546	-	925	protein_coding	PF00059:Lectin C-type domain	Lectin_C
ENSOARG00000004756	0	1	0	1	11	7	0	0.192622	0	0.167331	1.92547	1.50428	0.333333	6.33333	-4.09409	0.0605087	NA	3.29928	HAMP	14	45097469	45098753	+	249	protein_coding	-	-
ENSOARG00000000192	731	852	1128	623	917	611	6.29408	6.58997	8.20674	4.18604	6.44541	5.27242	903.667	717	0.407476	0.0605972	0.833335	802.228	-	14	57685819	57703801	+	6201	protein_coding	PF00096:Zinc finger, C2H2 type|PF01352:KRAB box	KRAB
ENSOARG00000001350	0	0	7	19	13	14	0	0	0.55211	1.38399	0.990582	1.30967	2.33333	15.3333	-2.70797	0.0606157	0.833335	8.47533	-	JH923343.1	261	1038	-	572	protein_coding	PF07686:Immunoglobulin V-set domain	V-set
ENSOARG00000015467	176	126	119	145	75	52	9.22179	5.93064	5.26861	5.92885	3.20797	2.73061	140.333	90.6667	0.776563	0.0607742	0.833335	115.044	DRAM1	3	170755191	170793415	+	1019	protein_coding	PF10277:Frag1/DRAM/Sfk1 family	-
ENSOARG00000015131	121	56	117	82	63	18	2.51575	1.04592	2.05549	1.33044	1.06927	0.375066	98	54.3333	1.00894	0.0608739	0.833335	75.3641	CDH4	13	54490568	54617687	-	2568	protein_coding	PF00028:Cadherin domain|PF01049:Cadherin cytoplasmic region|PF08758:Cadherin prodomain like	Cadherin
ENSOARG00000000608	4	2	0	4	11	24	0.0671598	0.0301653	0	0.0524095	0.150768	0.403845	2	13	-2.65881	0.0609867	0.833335	7.82487	-	AMGL01124812.1	2096	5366	+	3180	protein_coding	PF00530:Scavenger receptor cysteine-rich domain	SRCR
ENSOARG00000020727	245	275	195	276	596	300	20.7636	20.9362	13.9642	18.2535	41.2334	25.4807	238.333	390.667	-0.611743	0.0609979	0.833335	309.822	RBPMS2	7	42419056	42429922	+	630	protein_coding	PF00076:RNA recognition motif. (a.k.a. RRM, RBD, or RNP domain)	RRM_1
ENSOARG00000002010	774	875	1034	1194	1194	1111	9.15495	9.29719	10.3343	11.021	11.5289	13.1699	894.333	1166.33	-0.31071	0.0610392	0.833335	1018.19	ERCC6	25	43212228	43287197	-	4514	protein_coding	PF00271:Helicase conserved C-terminal domain|PF00176:SNF2 family N-terminal domain	SNF2_N
ENSOARG00000020653	56	81	118	156	126	141	0.898694	1.16772	1.60012	1.95366	1.65067	2.26776	85	141	-0.675226	0.0611148	0.833335	110.975	MCF2L2	1	201869949	202136532	+	3327	protein_coding	PF00621:RhoGEF domain|PF13716:Divergent CRAL/TRIO domain	RhoGEF
ENSOARG00000017789	180	328	294	279	170	118	18.3059	29.9654	25.2645	22.1423	14.1134	12.0269	267.333	189	0.604677	0.0611493	0.833335	223.677	-	9	94350406	94360185	-	525	protein_coding	-	-
ENSOARG00000002063	32	39	10	60	60	69	0.684788	0.749721	0.180823	1.00198	1.04815	1.47982	27	63	-1.13094	0.0611809	0.833335	44.8791	SRRM4	17	55745635	55916400	-	2495	protein_coding	PF15230:Serine/arginine repetitive matrix protein C-terminus	-
ENSOARG00000019063	93	70	30	37	30	33	3.50916	2.37272	0.956507	1.08949	0.924077	1.24792	64.3333	33.3333	1.06608	0.0612203	0.833335	49.9529	CBLN3	7	20361121	20363125	+	1415	protein_coding	PF00386:C1q domain	-
ENSOARG00000018403	30	32	92	93	99	107	0.533921	0.511604	1.38353	1.29163	1.43833	1.9085	51.3333	99.6667	-0.926967	0.0613284	0.833535	74.1443	-	12	60109435	60146681	+	3000	protein_coding	PF15737:Domain of unknown function (DUF4685)	-
ENSOARG00000001659	28447	16355	19472	17176	20639	13735	157.884	81.5419	91.3185	74.3916	93.5097	76.3983	21424.7	17183.3	0.436115	0.0613676	0.833535	19341.2	WDFY4	25	42606155	42860215	+	9620	protein_coding	PF02138:Beige/BEACH domain|PF14844:PH domain associated with Beige/BEACH	Beach
ENSOARG00000006863	830	1187	1110	1456	1559	1123	42.57	54.6897	48.1056	58.2757	65.2738	57.7244	1042.33	1379.33	-0.318729	0.0613803	0.833535	1189.12	AGA	26	7411608	7422813	-	1041	protein_coding	PF01112:Asparaginase	Asparaginase_2
ENSOARG00000001166	612	444	615	600	436	238	9.41399	6.13527	7.99363	7.20234	5.47489	3.66904	557	424.667	0.523254	0.0616014	0.833702	484.188	NRIP1	1	140597192	140600662	+	3471	protein_coding	PF15689:Nuclear receptor-interacting protein 1 repression 3|PF15690:Nuclear receptor-interacting protein 1 repression 4|PF15687:Nuclear receptor-interacting protein 1 repression 1|PF15688:Nuclear receptor-interacting protein 1 repression 2	-
ENSOARG00000003313	401	522	468	375	325	385	16.9117	19.7762	16.6777	12.3417	11.189	16.2726	463.667	361.667	0.424784	0.0616305	0.833702	412.409	DDX28	14	34817125	34818459	-	1266	protein_coding	PF00270:DEAD/DEAH box helicase	DEAD
ENSOARG00000001700	1646	2953	3252	3104	4053	3762	24.3714	39.2774	40.6863	35.8652	48.9885	55.8243	2617	3639.67	-0.430585	0.061661	0.833702	3089.51	PLCG1	13	69403562	69417129	+	3606	protein_coding	PF00018:SH3 domain|PF00168:C2 domain|PF00387:Phosphatidylinositol-specific phospholipase C, Y domain|PF00017:SH2 domain|PF00388:Phosphatidylinositol-specific phospholipase C, X domain	PI-PLC-X
ENSOARG00000018090	10	16	31	64	64	19	0.195146	0.280485	0.511174	0.974632	1.01955	0.371593	19	49	-1.26033	0.0616783	0.833702	32.094	C3orf20	19	57395864	57446138	-	2736	protein_coding	PF14977:FAM194 protein	-
ENSOARG00000017521	379	173	557	409	128	140	3.27066	1.34113	4.06161	2.75436	0.901723	1.21082	369.667	225.667	0.831703	0.0617257	0.833702	292.979	HBEGF	5	48917000	48951593	-	6187	protein_coding	-	-
ENSOARG00000013102	25504	31680	33368	43380	37653	32290	394.928	440.68	436.603	524.203	475.966	501.108	30184	37774.3	-0.239181	0.0618685	0.834986	33441.4	ETS1	21	31044040	31116808	-	3448	protein_coding	PF02198:Sterile alpha motif (SAM)/Pointed domain|PF00178:Ets-domain	Ets
ENSOARG00000021060	148	139	166	325	197	185	4.77175	4.02587	4.52242	8.17711	5.185	5.9778	151	235.667	-0.539859	0.0620768	0.836642	189.139	RORC	1	100648111	100672007	-	1656	protein_coding	PF00104:Ligand-binding domain of nuclear hormone receptor|PF00105:Zinc finger, C4 type (two domains)	zf-C4
ENSOARG00000001973	157	74	156	49	57	105	13.0569	5.52843	10.9626	3.18008	3.86975	8.75154	129	70.3333	0.908698	0.0621091	0.836642	101.77	TP53I11	15	73196830	73199968	-	642	protein_coding	PF14936:Tumour protein p53-inducible protein 11	-
ENSOARG00000013026	104	173	110	339	194	136	7.87628	11.7696	7.03926	20.0349	11.9938	10.3224	129	223	-0.669018	0.0621345	0.836642	170.229	MCUR1	20	41851565	41865195	+	705	protein_coding	PF07798:Protein of unknown function (DUF1640)	-
ENSOARG00000012867	54	127	69	159	136	140	3.29129	6.95352	3.5536	7.56258	6.76672	8.55173	83.3333	145	-0.728068	0.0622386	0.837401	112.355	VGLL4	19	55462990	55496963	-	876	protein_coding	PF15245:Transcription cofactor vestigial-like protein 4	-
ENSOARG00000009602	7816	9904	9074	10285	6805	5779	152.026	173.051	149.135	156.113	108.051	112.652	8931.33	7623	0.331007	0.0623031	0.837626	8169.18	-	21	25632801	25641210	-	2745	protein_coding	PF00056:lactate/malate dehydrogenase, NAD binding domain|PF02866:lactate/malate dehydrogenase, alpha/beta C-terminal domain	-
ENSOARG00000011738	610	668	649	585	366	534	35.4784	34.9011	31.8952	26.5516	17.3773	31.1264	642.333	495	0.4473	0.0623822	0.837888	569.159	-	1	262316078	262324191	-	918	protein_coding	PF08205:CD80-like C2-set immunoglobulin domain|PF07686:Immunoglobulin V-set domain	V-set
ENSOARG00000013997	2392	2626	2340	2005	2440	1871	129.79	127.999	107.286	84.8977	108.078	101.744	2452.67	2105.33	0.308399	0.0624583	0.837888	2270.11	STARD7	3	104054635	104064470	+	984	protein_coding	PF01852:START domain	START
ENSOARG00000025925	12	11	11	28	39	23	0.190743	0.157068	0.147743	0.347316	0.506055	0.366394	11.3333	30	-1.30348	0.0624661	0.837888	20.1499	-	3	657336	660937	-	3359	lincRNA	-	-
ENSOARG00000009360	0	0	0	2	2	10	0	0	0	0.0512491	0.0536109	0.329086	0	4.66667	-4.70525	0.0625828	NA	2.46433	-	X	50831307	50838305	-	1626	protein_coding	-	-
ENSOARG00000005008	187	960	518	978	765	3897	19.127	88.2076	44.7696	78.063	63.8755	399.476	555	1880	-1.82962	0.0627641	0.84065	1264.81	RHEX	12	3130301	3133843	+	522	protein_coding	PF15763:Domain of unknown function (DUF4692)	-
ENSOARG00000017890	110	230	280	306	277	401	3.04939	5.72766	6.55881	6.61976	6.26854	11.1409	206.667	328	-0.644075	0.0628211	0.840718	265.093	BTBD11	3	175894980	175970988	+	1926	protein_coding	PF12796:Ankyrin repeats (3 copies)|PF00651:BTB/POZ domain|PF00023:Ankyrin repeat	BTB
ENSOARG00000018381	63	75	47	102	119	104	0.991365	1.06019	0.624939	1.25254	1.52864	1.64014	61.6667	108.333	-0.725382	0.0628943	0.841056	84.2053	PARD3B	2	205957943	206670334	+	3393	protein_coding	PF00595:PDZ domain (Also known as DHR or GLGF)	PDZ
ENSOARG00000014479	3528	2871	2844	3166	2450	2206	101.765	74.393	69.3181	71.2658	57.6903	63.7719	3081	2607.33	0.348066	0.06297	0.841062	2836.03	RPA1	11	22518627	22561972	+	1851	protein_coding	PF01336:OB-fold nucleic acid binding domain|PF04057:Replication factor-A protein 1, N-terminal domain|PF08646:Replication factor-A C terminal domain|PF16900:Replication protein A OB domain	tRNA_anti
ENSOARG00000004523	1453	2449	1950	2363	3033	2593	105.263	159.377	119.369	133.59	179.369	188.263	1950.67	2663	-0.384089	0.063092	0.841772	2281.33	-	8	82622686	82631817	-	737	protein_coding	PF02777:Iron/manganese superoxide dismutases, C-terminal domain|PF00081:Iron/manganese superoxide dismutases, alpha-hairpin domain	-
ENSOARG00000008880	1	0	0	4	1	13	0.0106741	0	0	0.0333191	0.00871364	0.139069	0.333333	6	-4.10311	0.0632638	NA	3.35014	SH2D5	2	244792202	244806309	+	5002	protein_coding	-	-
ENSOARG00000014260	877	864	758	886	568	577	43.8435	38.8014	32.02	34.5652	23.1804	28.9091	833	677	0.402855	0.0632801	0.842539	751.784	CCR1	19	53152436	53153503	+	1068	protein_coding	PF00001:7 transmembrane receptor (rhodopsin family)	7tm_1
ENSOARG00000019788	1626	1579	1955	1649	1536	1330	34.4233	30.0291	34.9724	27.2428	26.5454	28.2187	1720	1505	0.277617	0.0632964	0.842539	1600.01	GNL2	1	12156615	12180760	-	2522	protein_coding	PF01926:50S ribosome-binding GTPase|PF08153:NGP1NT (NUC091) domain	-
ENSOARG00000013480	691	621	1122	760	726	404	10.5201	8.493	14.4338	9.02931	9.02286	6.16419	811.333	630	0.464674	0.0633183	0.842539	707.266	JAK2	2	72781813	72895325	+	3507	protein_coding	PF07714:Protein tyrosine kinase	Pkinase_Tyr
ENSOARG00000008167	196	294	332	211	232	178	35.9617	48.4574	51.4717	30.2111	34.7487	32.7309	274	207	0.477316	0.0633419	0.842539	237.704	LST1	20	26845046	26846081	-	291	protein_coding	-	-
ENSOARG00000008706	1719	1349	1516	1804	1095	757	21.713	15.3068	16.1804	17.782	11.2908	9.58283	1528	1218.67	0.45887	0.0635884	0.845176	1357.75	DAPK1	2	31865552	31962542	-	4227	protein_coding	PF00069:Protein kinase domain|PF12796:Ankyrin repeats (3 copies)|PF00531:Death domain	Pkinase
ENSOARG00000016822	239	756	627	738	986	809	7.81906	22.2181	17.3329	18.8414	26.333	26.5252	540.667	844.333	-0.596811	0.0636446	0.845282	679.563	TXK	6	66735049	66795736	-	1632	protein_coding	PF00017:SH2 domain|PF00018:SH3 domain|PF07714:Protein tyrosine kinase	Pkinase_Tyr
ENSOARG00000008888	1484	1810	2878	1837	1879	1250	12.2786	13.4531	20.1211	11.8611	12.6914	10.3652	2057.33	1655.33	0.392866	0.0637064	0.845461	1822.88	PCM1	26	17963767	18050658	-	6453	protein_coding	PF15717:Pericentriolar material 1 C terminus	-
ENSOARG00000008270	62	56	19	27	8	23	2.64191	2.14359	0.68411	0.897821	0.27828	0.982216	45.6667	19.3333	1.3427	0.0637782	0.845773	33.4054	C16orf46	14	7151256	7153653	-	1253	protein_coding	PF15032:Protein of unknown function (DUF4529)	-
ENSOARG00000012965	1319	2308	1757	2003	2586	3087	64.8473	101.932	72.9903	76.8472	103.787	152.103	1794.67	2558.67	-0.472014	0.0639325	0.846786	2173.74	S1PR4	5	18206532	18207647	-	1086	protein_coding	PF00001:7 transmembrane receptor (rhodopsin family)	7tm_1
ENSOARG00000016253	517	806	988	1375	1145	766	28.3115	39.6493	45.7168	58.7591	51.1852	42.0392	770.333	1095.33	-0.419188	0.0639513	0.846786	905.946	-	X	19210795	19238228	+	975	protein_coding	PF01564:Spermine/spermidine synthase domain|PF17284:Spermidine synthase tetramerisation domain	-
ENSOARG00000019307	0	0	0	0	2	15	0	0	0	0	0.133289	1.22728	0	5.66667	-5.03995	0.0639525	NA	3.10627	-	1	86199012	86202220	+	654	protein_coding	PF02798:Glutathione S-transferase, N-terminal domain|PF00043:Glutathione S-transferase, C-terminal domain	GST_N
ENSOARG00000003620	76	60	64	212	200	34	0.873208	0.619276	0.621342	1.90082	1.87586	0.391504	66.6667	148.667	-0.985307	0.06401	0.846924	102.133	KCP	4	92905828	92937697	-	4647	protein_coding	PF00094:von Willebrand factor type D domain|PF00093:von Willebrand factor type C domain	VWD
ENSOARG00000008313	63	203	159	340	267	148	3.48209	10.0792	7.4258	14.6649	12.047	8.19813	141.667	251.667	-0.734135	0.0641452	0.848073	188.882	LPAR6	10	18533288	18535461	-	966	protein_coding	PF00001:7 transmembrane receptor (rhodopsin family)	7tm_1
ENSOARG00000019445	2968	8353	7030	9695	9425	7722	32.3601	81.8121	64.7662	82.4887	83.887	84.3781	6117	8947.33	-0.486722	0.0643642	0.850326	7359.03	-	7	21865716	21878952	-	4897	protein_coding	PF09291:Domain of unknown function (DUF1968)	-
ENSOARG00000002532	0	1	14	46	30	5	0	0.0321252	0.42305	1.28373	0.8758	0.179201	5	27	-2.34721	0.0645897	0.851791	14.6008	-	JH922202.1	4472	8473	-	1493	protein_coding	PF16497:MHC-I family domain|PF07654:Immunoglobulin C1-set domain	C1-set
ENSOARG00000008610	427	197	484	208	173	315	15.5408	6.44083	14.8847	5.90759	5.13995	11.4898	369.333	232	0.712361	0.0646098	0.851791	304.646	-	1	34452841	34483346	-	1467	protein_coding	PF00067:Cytochrome P450	p450
ENSOARG00000000826	437	450	356	579	632	540	16.4081	15.1781	11.2947	16.9651	19.3714	20.32	414.333	583.667	-0.402869	0.064621	0.851791	494.905	COQ6	7	82255656	82269182	+	1422	protein_coding	PF01494:FAD binding domain	FAD_binding_3
ENSOARG00000003037	452	236	350	226	285	237	7.6154	3.57187	4.98275	2.97141	3.91982	4.00181	346	249.333	0.569127	0.0647619	0.852101	299.835	FARP1	10	74563400	74799926	+	3169	protein_coding	PF00169:PH domain|PF00373:FERM central domain|PF08736:FERM adjacent (FA)|PF09380:FERM C-terminal PH-like domain|PF09379:FERM N-terminal domain|PF00621:RhoGEF domain	RhoGEF
ENSOARG00000016898	189	295	247	206	200	150	2.50462	3.5118	2.76582	2.13033	2.1636	1.99216	243.667	185.333	0.481938	0.064818	0.852101	212.301	SLC41A2	3	173444992	173559605	-	4029	protein_coding	PF01769:Divalent cation transporter	-
ENSOARG00000018471	885	1012	1073	1013	817	734	30.8836	31.7245	31.6397	27.5864	23.2742	25.6705	990	854.667	0.300016	0.0648374	0.852101	913.688	HARS	5	49189098	49201632	-	1530	protein_coding	PF13393:Histidyl-tRNA synthetase|PF00458:WHEP-TRS domain|PF03129:Anticodon binding domain	HGTP_anticodon
ENSOARG00000016753	801	737	796	742	726	523	16.096	13.304	13.5159	11.6356	11.9094	10.5327	778	663.667	0.331068	0.0648834	0.852101	715.336	BCAS3	11	11475103	11863162	-	2657	protein_coding	PF12490:Breast carcinoma amplified sequence 3	-
ENSOARG00000002555	270	589	515	671	568	809	14.6503	28.7095	23.6122	28.4122	25.1592	43.993	458	682.667	-0.540775	0.0648877	0.852101	566.087	LGALS12	21	41180601	41189192	+	984	protein_coding	PF00337:Galactoside-binding lectin	-
ENSOARG00000014900	198	177	267	323	354	258	3.511	2.81947	4.00059	4.4696	5.12431	4.585	214	311.667	-0.456921	0.0649722	0.852572	258.081	CCDC154	24	1031102	1039442	-	3011	protein_coding	PF15450:Coiled-coil domain-containing protein 154	-
ENSOARG00000016480	25	0	0	0	1	0	0.336053	0	0	0	0.0109732	0	8.33333	0.333333	4.7493	0.065028	0.852665	4.813	LVRN	7	4631939	4704862	+	3972	protein_coding	PF11838:ERAP1-like C-terminal domain|PF01433:Peptidase family M1 domain	-
ENSOARG00000002032	5	11	1	0	0	1	0.155662	0.307634	0.0263063	0	0	0.0312008	5.66667	0.333333	4.08462	0.0651922	NA	3.12167	-	JH924330.1	21	3766	-	1715	protein_coding	PF00008:EGF-like domain|PF00054:Laminin G domain|PF01390:SEA domain	EGF
ENSOARG00000004877	9791	12131	10544	14983	14445	11696	1778.1	1979.04	1618.01	2123.38	2141.48	2128.73	10822	13708	-0.250791	0.06522	0.854149	12099.1	-	15	34964574	34965966	+	294	protein_coding	-	-
ENSOARG00000017471	814	974	847	849	782	631	118.746	127.639	104.406	96.6504	93.1256	92.2526	878.333	754	0.313893	0.0652387	0.854149	809.886	PFDN1	5	48825562	48896702	-	366	protein_coding	PF01920:Prefoldin subunit	-
ENSOARG00000009530	0	14	7	1	0	0	0	0.387244	0.182126	0.0240286	0	0	7	0.333333	4.32329	0.0653283	NA	3.59952	YES1	23	35920734	35941754	-	1734	protein_coding	PF00018:SH3 domain|PF07714:Protein tyrosine kinase|PF00017:SH2 domain	Pkinase_Tyr
ENSOARG00000007458	7820	5176	5870	5154	5681	4701	66.4956	39.5375	42.1766	34.2004	39.4346	40.0618	6288.67	5178.67	0.381732	0.0653594	0.85509	5749.58	HLA-DOB	20	7234829	7248527	-	6279	protein_coding	PF00969:Class II histocompatibility antigen, beta domain|PF07654:Immunoglobulin C1-set domain	C1-set
ENSOARG00000003012	43	19	43	13	19	15	0.500842	0.198799	0.423202	0.118161	0.180656	0.175096	35	15.6667	1.24567	0.065733	0.857445	25.5906	PLEKHG1	8	74435427	74585218	+	4584	protein_coding	PF00621:RhoGEF domain	RhoGEF
ENSOARG00000010250	86	112	98	163	127	188	4.02782	4.71214	3.87833	5.95744	4.85559	8.82436	98.6667	159.333	-0.635236	0.0657597	0.857445	128.559	-	2	42781397	42786498	-	1140	protein_coding	PF15552:Domain of unknown function (DUF4657)	-
ENSOARG00000007233	562	201	208	283	173	173	59.8929	19.2426	18.7305	23.5356	15.0505	18.4773	323.667	209.667	0.775325	0.0658288	0.857445	271.317	ISG15	12	49537787	49538733	-	501	protein_coding	PF00240:Ubiquitin family	ubiquitin
ENSOARG00000015169	1015	969	594	715	740	564	38.9317	33.388	19.2518	21.4015	23.1705	21.6805	859.333	673	0.465424	0.0658796	0.857445	768.091	IFIT2	22	10770400	10776591	+	1392	protein_coding	-	-
ENSOARG00000009130	3899	3178	2705	2806	3524	1345	59.7176	43.7252	35.0077	33.538	44.0607	20.6455	3260.67	2558.33	0.493179	0.065882	0.857445	2885.31	ITGAX	24	27400568	27419288	+	3486	protein_coding	PF01839:FG-GAP repeat|PF08441:Integrin alpha|PF00092:von Willebrand factor type A domain	VWA
ENSOARG00000002826	41	29	50	16	25	18	2.39243	1.52014	2.46531	0.728578	1.19086	1.05264	40	19.6667	1.10323	0.0660649	0.858272	29.914	-	24	25997816	25998752	+	915	protein_coding	PF03066:Nucleoplasmin/nucleophosmin domain|PF16276:Nucleophosmin C-terminal domain	-
ENSOARG00000001836	76	0	3	10	3	0	4.36792	0	0.14569	0.448499	0.14075	0	26.3333	4.33333	2.91449	0.0660925	0.858272	16.558	CAVIN1	11	41994203	42005842	-	929	protein_coding	PF15237:PTRF/SDPR family	-
ENSOARG00000003341	1060	767	574	665	598	576	135.721	88.2195	62.1011	66.445	62.5041	73.9123	800.333	613	0.494512	0.066149	0.85837	712.72	IFI6	2	238537980	238539929	+	417	protein_coding	PF06140:Interferon-induced 6-16 family	-
ENSOARG00000015543	8	2	10	1	1	0	0.171128	0.0384318	0.18075	0.0166929	0.0174622	0	6.66667	0.666667	3.46161	0.0661576	NA	3.70461	ARHGAP44	11	30857961	30908616	+	2496	protein_coding	PF00620:RhoGAP domain|PF03114:BAR domain	RhoGAP
ENSOARG00000003275	49	135	57	180	317	47	0.446452	1.10495	0.438834	1.27983	2.35779	0.429171	80.3333	181.333	-1.03367	0.0662901	0.859208	124.186	WFIKKN2	11	35444765	35453108	-	5860	protein_coding	PF00014:Kunitz/Bovine pancreatic trypsin inhibitor domain|PF00095:WAP-type (Whey Acidic Protein) 'four-disulfide core'|PF01759:UNC-6/NTR/C345C module|PF07679:Immunoglobulin I-set domain	Kunitz_BPTI
ENSOARG00000026465	12	18	34	45	43	53	0.3337	0.449652	0.798916	0.976536	0.976136	1.47708	21.3333	47	-1.10694	0.0663127	0.859208	33.649	-	18	62943201	62946368	+	1920	lincRNA	-	-
ENSOARG00000001042	0	0	0	6	2	6	0	0	0	0.307495	0.107222	0.394904	0	4.66667	-4.61132	0.0663692	NA	2.3009	TEPP	14	25316728	25323551	+	813	protein_coding	-	-
ENSOARG00000003484	208	190	291	354	386	263	18.7911	15.4195	22.2141	24.957	28.4671	23.8121	229.667	334.333	-0.453365	0.0664034	0.859208	276.255	IL18BP	15	49841475	49843715	+	591	protein_coding	-	-
ENSOARG00000001668	216	227	247	232	181	106	10.4086	9.82633	10.0573	8.72419	7.12003	5.11913	230	173	0.526928	0.0664098	0.859208	198.606	TFEC	4	52298499	52441976	+	1108	protein_coding	PF00010:Helix-loop-helix DNA-binding domain|PF11851:Domain of unknown function (DUF3371)	HLH
ENSOARG00000017856	3	14	65	13	5	0	0.0452987	0.189898	0.829325	0.153182	0.0616313	0	27.3333	6	2.29303	0.0665509	0.859597	15.8326	MEGF10	5	24052309	24205017	-	3536	protein_coding	-	-
ENSOARG00000006092	240	449	487	646	338	906	3.38728	5.69266	5.80786	7.11497	3.89425	12.8151	392	630	-0.675858	0.0665653	0.859597	511.962	L1CAM	X	77532429	77545673	+	3783	protein_coding	PF13927:Immunoglobulin domain|PF07679:Immunoglobulin I-set domain|PF13882:Bravo-like intracellular region|PF00041:Fibronectin type III domain	fn3
ENSOARG00000014953	0	10	7	0	0	0	0	0.940449	0.619229	0	0	0	5.66667	0	4.97338	0.0666268	NA	2.78276	EREG	6	88988358	88994874	+	510	protein_coding	-	-
ENSOARG00000011574	262	256	307	296	173	155	12.1114	10.6307	11.9917	10.6779	6.52841	7.18092	275	208	0.507906	0.0667141	0.859619	238.788	RAD51C	11	9218896	9245671	+	1155	protein_coding	PF08423:Rad51	-
ENSOARG00000014085	300	847	873	1119	1530	628	41.3892	104.973	101.772	120.475	172.315	86.8318	673.333	1092.33	-0.613583	0.0667249	0.859619	849.84	SH2D1A	X	102649148	102669118	+	387	protein_coding	PF00017:SH2 domain	SH2
ENSOARG00000001168	1324	1589	1645	2162	1934	1687	24.52	26.4353	25.7421	31.2455	29.2385	31.3113	1519.33	1927.67	-0.259406	0.0667361	0.859619	1698.66	PPP4R1	23	42015205	42044225	-	2883	protein_coding	PF15017:Putative WW-binding domain and destruction box	-
ENSOARG00000007502	2914	2053	3965	3477	1830	1557	64.2911	40.6892	73.9182	59.8641	32.9594	34.4273	2977.33	2288	0.490603	0.066788	0.859656	2590.99	NFKBIA	18	44533631	44538036	-	2420	protein_coding	PF00023:Ankyrin repeat|PF12796:Ankyrin repeats (3 copies)	Ank
ENSOARG00000014283	2071	330	114	384	162	54	15.8462	2.26824	0.737051	2.29286	1.01188	0.414088	838.333	200	2.33822	0.0669135	0.859752	550.242	-	3	104735638	104789477	+	6978	protein_coding	PF00520:Ion transport protein	Ion_trans
ENSOARG00000009533	37	103	58	35	35	36	5.58053	13.9553	7.39177	4.11947	4.30931	5.44164	66	35.3333	0.961051	0.0669781	0.859752	50.502	-	X	94712418	94712771	-	354	protein_coding	PF16297:Domain of unknown function (DUF4939)	-
ENSOARG00000019985	10	10	17	3	5	1	0.178033	0.15993	0.255738	0.0416794	0.0726669	0.0178424	12.3333	3	2.14975	0.0670724	0.860156	7.61363	DENND2C	1	91106086	91144694	-	2999	protein_coding	PF03456:uDENN domain|PF03455:dDENN domain|PF02141:DENN (AEX-3) domain	DENN
ENSOARG00000023909	0	0	0	2	7	5	0	0	0	0.559269	2.04765	1.79562	0	4.66667	-4.60725	0.0671185	NA	2.2936	RF00156	2	198619991	198620139	+	149	snoRNA	-	-
ENSOARG00000002585	56	102	40	114	119	131	4.03503	6.60218	2.43537	6.41008	6.99958	9.45983	66	121.333	-0.806332	0.0672216	0.860879	93.1158	MOB3C	1	20944835	20947797	-	741	protein_coding	PF03637:Mob1/phocein family	-
ENSOARG00000009983	113	62	119	180	191	126	6.70367	3.30411	5.96524	8.33311	9.24984	7.49132	98	165.667	-0.653083	0.0673157	0.860879	129.191	FOSB	14	52143114	52147300	+	900	protein_coding	PF00170:bZIP transcription factor	bZIP_1
ENSOARG00000011481	687	1019	762	991	1059	1504	32.8677	43.7941	30.8045	36.9987	41.3595	72.1131	822.667	1184.67	-0.484519	0.0673173	0.860879	1006.34	PIM2	X	52890972	52895422	+	1116	protein_coding	PF00069:Protein kinase domain	Pkinase
ENSOARG00000009380	4	4	0	6	9	29	0.06263	0.0562615	0	0.0733118	0.115035	0.455065	2.66667	14.6667	-2.44348	0.0673253	0.860879	9.08058	-	X	3429350	3790319	-	3410	protein_coding	PF00135:Carboxylesterase family	COesterase
ENSOARG00000010627	311	493	507	541	1238	386	1.32861	1.89196	1.83017	1.80357	4.31741	1.65264	437	721.667	-0.622992	0.0675147	0.862671	560.646	NBEA	10	26007917	26592574	-	12498	protein_coding	PF14844:PH domain associated with Beige/BEACH|PF13385:Concanavalin A-like lectin/glucanases superfamily|PF06469:Domain of Unknown Function (DUF1088)|PF02138:Beige/BEACH domain|PF15787:Domain of unknown function (DUF4704)	Beach
ENSOARG00000002109	17	19	42	45	53	67	2.17665	2.18536	4.54398	4.49628	5.53966	8.59744	26	55	-1.05644	0.0676048	0.862866	40.1526	-	JH922011.1	6253	6751	-	417	protein_coding	PF07686:Immunoglobulin V-set domain	V-set
ENSOARG00000019806	363	834	1085	1502	971	994	2.38246	4.91715	6.01722	7.69289	5.20241	6.53821	760.667	1155.67	-0.544483	0.0676715	0.862866	931.807	PLXNB2	3	223878088	223892897	-	8135	protein_coding	PF01403:Sema domain|PF01833:IPT/TIG domain|PF08337:Plexin cytoplasmic RasGAP domain	Sema
ENSOARG00000022231	5	1	0	5	12	22	3.06851	0.551298	0	2.39457	6.01181	13.5311	2	13	-2.62521	0.0676777	0.862866	7.76856	-	1	97341622	97341708	-	87	miRNA	-	-
ENSOARG00000019551	112	105	200	349	190	159	2.40254	2.02334	3.62517	5.84221	3.32715	3.41824	139	232.667	-0.645309	0.0677384	0.863011	179.673	ZDHHC23	1	176983259	176995422	+	2489	protein_coding	PF01529:DHHC palmitoyltransferase	-
ENSOARG00000013305	3	25	15	68	20	37	0.0425887	0.318817	0.179933	0.753325	0.231777	0.526416	14.3333	41.6667	-1.47574	0.0677923	0.863071	27.0024	CAMK1G	12	71847530	71871488	-	3761	protein_coding	PF00069:Protein kinase domain	Pkinase
ENSOARG00000025723	712	637	648	679	439	493	12.464	10.0172	9.58514	9.2757	6.27347	8.64923	665.667	537	0.405392	0.06796	0.863264	600.012	-	17	72031647	72084547	+	3050	lincRNA	-	-
ENSOARG00000003057	0	0	0	5	1	8	0	0	0	0.251603	0.0526396	0.516999	0	4.66667	-4.6552	0.0680349	NA	2.37591	-	19	58799433	58808181	+	828	protein_coding	PF15799:Coiled-coil domain-containing protein 48	-
ENSOARG00000010710	18	41	5	33	31	115	0.421516	0.862491	0.098937	0.603054	0.592612	2.69894	21.3333	59.6667	-1.4904	0.0680717	0.863264	42.0411	CALN1	24	28550611	29016799	+	2280	protein_coding	PF13499:EF-hand domain pair	-
ENSOARG00000002999	228	387	260	432	453	385	13.6473	20.809	13.1502	20.1788	22.1349	23.0954	291.667	423.333	-0.458049	0.0680763	0.863264	352.513	ZNF32	25	45176441	45178591	+	892	protein_coding	PF00096:Zinc finger, C2H2 type	zf-C2H2
ENSOARG00000016464	31	34	86	133	68	93	3.85817	3.80126	9.04409	12.9173	6.90868	11.5999	50.3333	98	-0.907423	0.0681717	0.863264	72.2091	-	4	105495694	105496258	+	429	protein_coding	PF07686:Immunoglobulin V-set domain	V-set
ENSOARG00000003174	1008	1110	1269	965	1217	636	23.2079	22.9577	24.6879	17.3382	22.8735	14.6753	1129	939.333	0.367062	0.0681756	0.863264	1019.74	PPIG	2	138758565	138779078	-	2319	protein_coding	PF00160:Cyclophilin type peptidyl-prolyl cis-trans isomerase/CLD	Pro_isomerase
ENSOARG00000026628	46	62	34	86	106	72	6.56694	7.95107	4.10139	9.58084	12.3531	10.3013	47.3333	88	-0.794561	0.0682017	0.863264	66.5093	-	6	116168539	116169834	+	374	lincRNA	-	-
ENSOARG00000011272	355	712	885	560	495	396	6.98128	12.5781	14.7061	8.59399	7.94655	7.80469	650.667	483.667	0.493734	0.0682578	0.86335	556.543	PRDM1	8	30932908	31034103	-	2715	protein_coding	PF00856:SET domain	SET
ENSOARG00000000862	329	577	677	882	737	622	18.5883	29.2853	32.3207	38.8878	33.9922	35.22	527.667	747	-0.429997	0.0685223	0.864938	622.307	-	14	58834145	58835192	+	945	protein_coding	PF01284:Membrane-associating domain	-
ENSOARG00000008535	93	129	123	171	169	190	2.35218	2.93094	2.6287	3.37509	3.48933	4.8161	115	176.667	-0.559033	0.0685255	0.864938	144.613	PRSS53	24	27188022	27193240	-	2111	protein_coding	PF00089:Trypsin	Trypsin
ENSOARG00000016042	2	48	11	210	44	4	0.21972	4.73708	1.02113	18.0036	3.94602	0.440407	20.3333	86	-1.90661	0.068616	0.864938	48.2567	THY1	15	29450455	29452173	-	486	protein_coding	PF00047:Immunoglobulin domain	ig
ENSOARG00000001088	26	0	17	14	33	114	3.92145	0	2.16655	1.64779	4.06307	17.2318	14.3333	53.6667	-1.91382	0.068667	0.864938	35.8978	-	JH922768.1	47601	48172	-	354	protein_coding	PF07686:Immunoglobulin V-set domain	V-set
ENSOARG00000020903	1022	1226	1716	1408	1082	751	22.3726	24.1093	31.7416	24.0529	19.3356	16.4763	1321.33	1080.33	0.385112	0.0688313	0.864938	1177.91	CCPG1	7	51946458	51969770	+	2439	protein_coding	-	-
ENSOARG00000009076	512	582	730	584	562	369	13.7786	14.0698	16.5999	12.2644	12.3463	9.95211	608	505	0.361743	0.0688324	0.864938	548.209	USP14	23	35461828	35491514	+	1984	protein_coding	PF00443:Ubiquitin carboxyl-terminal hydrolase	UCH
ENSOARG00000014435	331	467	370	613	535	465	11.6421	14.7554	10.9965	16.8254	15.3612	16.3912	389.333	537.667	-0.377859	0.0689152	0.864938	456.361	TBC1D22B	20	11218657	11284178	+	1518	protein_coding	PF00566:Rab-GTPase-TBC domain	TBC
ENSOARG00000006086	827	1160	1120	1257	1736	1195	10.6117	13.3711	12.1435	12.5868	18.1842	15.3674	1035.67	1396	-0.352906	0.068943	0.864938	1197.03	PLEKHG2	14	48273892	48282981	+	4161	protein_coding	PF00169:PH domain|PF00621:RhoGEF domain	RhoGEF
ENSOARG00000003962	181	150	321	211	130	106	10.7021	7.96726	16.0377	9.7358	6.27479	6.28128	217.333	149	0.637408	0.0689727	0.864938	180.009	CDK5R1	11	17333810	17334712	-	903	protein_coding	PF03261:Cyclin-dependent kinase 5 activator protein	-
ENSOARG00000018624	26	84	8	28	5	7	3.8885	11.2854	1.01099	3.26788	0.610443	1.0492	39.3333	13.3333	1.70747	0.0689758	0.864938	26.3536	-	AMGL01130382.1	1163	1519	-	357	protein_coding	PF13676:TIR domain	-
ENSOARG00000006688	14	5	0	0	1	0	0.107754	0.0345703	0	0	0.00628307	0	6.33333	0.333333	4.31411	0.0690309	NA	3.60102	EVC	6	103029779	103127301	-	6937	protein_coding	-	-
ENSOARG00000009880	6200	5069	7273	5868	6434	2817	92.4151	67.8738	91.6034	68.2561	78.2886	42.0815	6180.67	5039.67	0.41613	0.0690691	0.865488	5518.47	ZEB2	2	164440832	164482586	+	3582	protein_coding	PF05605:Drought induced 19 protein (Di19), zinc-binding	-
ENSOARG00000003518	223	205	227	177	214	79	3.97013	3.27856	3.41486	2.45909	3.11014	1.40955	218.333	156.667	0.606786	0.0693228	0.867822	185.033	SNTB2	14	35721369	35787510	+	2999	protein_coding	-	-
ENSOARG00000016949	287	99	175	106	177	67	5.94626	1.84258	3.06371	1.71383	2.99366	1.3912	187	116.667	0.826988	0.0693545	0.867822	152.728	PDE6B	6	116901725	116929069	-	2577	protein_coding	PF00233:3'5'-cyclic nucleotide phosphodiesterase|PF01590:GAF domain	GAF
ENSOARG00000016555	5	64	85	47	98	233	0.0650171	0.747595	0.93395	0.476931	1.04028	3.03646	51.3333	126	-1.37521	0.0694744	0.868083	90.4113	-	4	105529581	105537242	+	4106	protein_coding	PF00089:Trypsin	Trypsin
ENSOARG00000019665	23	20	28	5	12	10	0.318552	0.248835	0.327685	0.0540409	0.135675	0.138805	23.6667	9	1.45415	0.0696463	0.869611	16.4921	RPGRIP1	7	23041563	23092580	-	3855	protein_coding	PF11618:First C2 domain of RPGR-interacting protein 1	-
ENSOARG00000016870	24	21	37	15	14	6	0.738991	0.580866	0.962667	0.360428	0.351902	0.185154	27.3333	11.6667	1.33781	0.0697315	0.870054	19.2847	-	17	71620813	71642473	-	1734	protein_coding	PF13906:C-terminus of AA_permease|PF13520:Amino acid permease	-
ENSOARG00000006824	1059	1063	903	1153	1687	1375	153.231	138.17	110.404	130.191	199.265	199.391	1008.33	1405	-0.396729	0.0697991	0.870279	1200.71	AAMDC	21	17543520	17565432	-	369	protein_coding	PF04430:Protein of unknown function (DUF498/DUF598)	DUF498
ENSOARG00000007050	1287	809	1089	982	958	649	78.1747	44.1433	55.8937	46.5478	47.5029	39.5081	1061.67	863	0.414427	0.0699747	0.871448	958.227	STAP1	6	83218338	83250708	+	879	protein_coding	PF00169:PH domain	PH
ENSOARG00000003880	147	150	134	193	182	321	3.86442	3.54231	2.97659	3.95935	3.90575	8.45718	143.667	232	-0.650201	0.0700208	0.871448	189.595	NOL4L	13	61188337	61315345	-	2031	protein_coding	-	-
ENSOARG00000004611	24	16	18	54	22	62	0.741986	0.444358	0.470223	1.3028	0.555231	1.92101	19.3333	46	-1.18947	0.0700422	0.871448	32.8128	MCP-3	18	33632415	33635335	+	1727	protein_coding	PF00089:Trypsin	Trypsin
ENSOARG00000009597	0	21	13	0	3	0	0	1.11913	0.651665	0	0.145285	0	11.3333	1	3.58421	0.0701014	0.871566	6.03307	-	X	97092692	97093591	+	900	protein_coding	PF03567:Sulfotransferase family	-
ENSOARG00000026800	0	0	0	6	1	7	0	0	0	0.0823158	0.0143515	0.123334	0	4.66667	-4.63149	0.0701194	NA	2.33505	-	26	31693202	31714456	-	3037	lincRNA	-	-
ENSOARG00000006606	1102	1196	1427	1092	1042	1038	75.7247	73.8271	82.8565	58.557	58.4507	71.4836	1241.67	1057.33	0.302856	0.0704003	0.873435	1143.54	SNF8	11	37140993	37148353	+	777	protein_coding	PF04157:EAP30/Vps36 family	-
ENSOARG00000023159	169	197	190	90	92	169	112.791	118.109	107.149	46.8737	50.1235	113.039	185.333	117	0.692352	0.0704013	0.873435	153.28	RF00494	21	590793	590872	-	80	snoRNA	-	-
ENSOARG00000014545	428	339	567	352	432	253	5.62437	4.00183	6.29593	3.60971	4.63426	3.33199	444.667	345.667	0.458647	0.0705557	0.873503	390.708	IFT74	2	94607523	94708596	+	4063	protein_coding	-	-
ENSOARG00000006946	416	407	187	359	214	113	5.09195	4.47522	1.9341	3.42914	2.13831	1.38619	336.667	228.667	0.721621	0.0705652	0.873503	281.473	-	2	13115138	13629521	-	4362	protein_coding	PF15304:A-kinase anchor protein 2 C-terminus|PF03285:Paralemmin	-
ENSOARG00000012424	182	173	205	274	331	214	25.9129	22.1269	24.663	30.4436	38.4716	30.536	186.667	273	-0.453438	0.0706263	0.873503	225.762	-	19	43029438	43032882	-	375	protein_coding	PF01900:Rpp14/Pop5 family	-
ENSOARG00000016208	2063	2038	2467	2911	2997	2411	71.0173	63.0228	71.7597	78.2001	84.2206	83.1794	2189.33	2773	-0.255408	0.0706421	0.873503	2448.22	RAB18	13	36103987	36132223	-	1551	protein_coding	PF00071:Ras family	Ras
ENSOARG00000017588	118	138	115	258	182	143	7.69263	8.08166	6.33487	13.1254	9.68569	9.34292	123.667	194.333	-0.543276	0.0706612	0.873503	155.418	-	18	34892932	34893750	-	819	processed_pseudogene	PF05920:Homeobox KN domain	Coprinus_mating
ENSOARG00000013164	0	0	0	13	0	5	0	0	0	0.812072	0	0.40112	0	6	-4.91335	0.0707324	NA	2.83015	-	15	80389134	80412010	+	667	protein_coding	PF04103:CD20-like family	-
ENSOARG00000024985	7	0	9	0	0	0	3.49294	0	3.79474	0	0	0	5.33333	0	4.94111	0.0707396	NA	2.72635	RF00026	10	33924787	33924893	-	107	snRNA	-	-
ENSOARG00000006669	1	24	62	5	10	7	0.0454014	0.978835	2.37853	0.177149	0.370626	0.318508	29	7.33333	1.98114	0.070754	0.873503	17.5663	-	23	62100351	62105829	-	1176	protein_coding	PF00079:Serpin (serine protease inhibitor)	Serpin
ENSOARG00000000244	491	810	656	937	910	809	8.96563	13.2866	10.1216	13.3518	13.5646	14.8048	652.333	885.333	-0.365512	0.0708197	0.873503	757.61	-	2	234395541	234403556	+	2924	protein_coding	PF06602:Myotubularin-like phosphatase domain	-
ENSOARG00000026615	6	13	4	17	22	32	0.390198	0.759461	0.219806	0.862745	1.16795	2.08563	7.66667	23.6667	-1.5842	0.0709611	0.873503	15.7432	-	6	113538065	113688241	-	821	lincRNA	-	-
ENSOARG00000016563	1105	1343	1160	1078	1039	974	60.7603	66.338	53.8967	46.2569	46.638	53.6747	1202.67	1030.33	0.304428	0.0710027	0.873503	1112.13	CRKL	17	71529554	71545924	+	971	protein_coding	PF00017:SH2 domain|PF07653:Variant SH3 domain|PF00018:SH3 domain	SH3_1
ENSOARG00000008375	74	86	51	35	1	42	0.534499	0.55801	0.311266	0.19728	0.00589632	0.304031	70.3333	26	1.4745	0.0710329	0.873503	49.3749	-	14	7181441	7283426	-	7392	protein_coding	PF08016:Polycystin cation channel|PF00059:Lectin C-type domain|PF02140:Galactose binding lectin domain|PF01825:GPCR proteolysis site, GPS, motif|PF01477:PLAT/LH2 domain|PF02010:REJ domain	Lectin_C
ENSOARG00000020112	2823	2399	2329	2397	2508	1544	111.319	84.9801	77.6023	73.7609	80.7332	61.0181	2517	2149.67	0.34448	0.0710398	0.873503	2317.15	CD86	1	184802052	184866057	+	1354	protein_coding	PF07686:Immunoglobulin V-set domain	V-set
ENSOARG00000000191	928	987	903	662	684	861	53.9737	51.568	44.3781	30.0464	32.4756	50.1869	939.333	735.667	0.412721	0.0710708	0.873503	842.879	SULT1C4	3	61762112	61769403	+	918	protein_coding	PF00685:Sulfotransferase domain	Sulfotransfer_1
ENSOARG00000008082	30	64	47	26	18	27	9.0495	17.3425	11.9798	6.12036	4.43244	8.16245	47	23.6667	1.04255	0.0711411	0.873503	35.3311	-	X	1084826	1090558	-	177	protein_coding	-	-
ENSOARG00000012344	866	849	1004	1910	1166	849	22.71	20.0002	22.2474	39.087	24.9611	22.3131	906.333	1308.33	-0.412354	0.0713404	0.875029	1077.49	-	14	54510282	54512989	+	2036	protein_coding	-	-
ENSOARG00000005060	131	188	285	141	162	121	2.40109	3.09544	4.41395	2.01677	2.42392	2.22267	201.333	141.333	0.574515	0.0715173	0.875374	168.848	-	8	90017204	90086418	-	2913	protein_coding	-	-
ENSOARG00000015827	22	15	19	10	7	3	4.05043	2.48084	2.95583	1.43674	1.05207	0.553546	18.6667	6.66667	1.6247	0.0716341	0.875374	12.7049	-	X	108558910	108559395	+	290	protein_coding	-	-
ENSOARG00000026635	60	25	19	91	63	77	1.2107	0.453164	0.323957	1.43294	1.03775	1.55715	34.6667	77	-1.0257	0.0716621	0.875374	55.6461	-	6	116826888	116831975	+	2646	lincRNA	-	-
ENSOARG00000004469	2117	3061	2913	3795	3065	3892	44.17	57.3718	51.3563	61.79	52.204	81.3828	2697	3584	-0.353248	0.071766	0.875485	3116.2	TAGAP	8	81999407	82062010	-	2559	protein_coding	PF00620:RhoGAP domain	RhoGAP
ENSOARG00000012326	199	261	285	228	171	173	32.197	37.9343	38.9632	28.7871	22.5853	28.0519	248.333	190.667	0.458883	0.0719313	0.876891	217.544	BOLA3	3	95898327	95905972	-	330	protein_coding	PF01722:BolA-like protein	-
ENSOARG00000007312	4105	2897	2632	3166	2531	2212	129.689	82.2181	70.2623	78.0551	65.2753	70.0372	3211.33	2636.33	0.402101	0.072018	0.877337	2927.95	SCPEP1	11	7371510	7393562	+	1690	protein_coding	PF00450:Serine carboxypeptidase	Peptidase_S10
ENSOARG00000015880	15	21	63	54	51	111	1.9345	2.4329	6.86537	5.43463	5.36924	14.3467	33	72	-1.15273	0.0722064	0.878017	52.6561	-	4	105325578	105326123	+	414	protein_coding	PF07686:Immunoglobulin V-set domain	V-set
ENSOARG00000013653	971	1023	1085	1282	1491	1220	14.2859	13.5205	13.4886	14.719	17.9075	17.9888	1026.33	1331	-0.29371	0.0722638	0.878017	1166.3	-	14	55239272	55244076	-	3629	protein_coding	PF08645:Polynucleotide kinase 3 phosphatase	-
ENSOARG00000001355	184	224	200	229	111	90	20.0903	21.9707	18.4521	19.5121	9.89367	9.84836	202.667	143.333	0.620536	0.0722918	0.878017	170.608	-	13	68972583	68976410	-	489	protein_coding	PF03131:bZIP Maf transcription factor	bZIP_Maf
ENSOARG00000005209	8	9	6	36	32	8	0.701374	0.708811	0.444485	2.46299	2.29021	0.702915	7.66667	25.3333	-1.56725	0.0723159	0.878017	15.577	SDC4	13	73172620	73181525	-	609	protein_coding	PF01034:Syndecan domain	-
ENSOARG00000026914	0	10	26	2	2	1	0	0.29625	0.724519	0.0514707	0.0538426	0.0330509	12	1.66667	2.87939	0.0723244	0.878017	6.56724	-	14	39504568	39509671	-	1619	lincRNA	-	-
ENSOARG00000022810	0	0	0	0	3	13	0	0	0	0	1.02154	5.43455	0	5.33333	-4.93388	0.0724742	NA	2.88538	RF00614	X	48057883	48058010	-	128	snoRNA	-	-
ENSOARG00000020213	7521	7321	7574	7256	6609	6144	55.9434	48.9184	47.6042	42.1183	40.1306	45.8013	7472	6669.67	0.251388	0.072644	0.880506	7040.44	ATP1A1	1	92852079	92888538	+	7178	protein_coding	PF00689:Cation transporting ATPase, C-terminus|PF00690:Cation transporter/ATPase, N-terminus|PF00122:E1-E2 ATPase|PF13246:Cation transport ATPase (P-type)|PF00702:haloacid dehalogenase-like hydrolase	E1-E2_ATPase
ENSOARG00000011328	27699	32717	43523	41483	20217	21604	1055.61	1120.06	1401.54	1233.7	628.958	825.138	34646.3	27768	0.412039	0.0727023	0.880506	30695.5	VIM	13	30747528	30755046	+	1401	protein_coding	PF04732:Intermediate filament head (DNA binding) region|PF00038:Intermediate filament protein	Filament
ENSOARG00000014305	410	585	416	448	310	346	3.11346	3.99065	2.66931	2.65484	1.92171	2.63323	470.333	368	0.438914	0.0727305	0.880506	417.518	BUB1	3	104787621	104827450	-	7031	protein_coding	PF08311:Mad3/BUB1 homology region 1|PF00069:Protein kinase domain	Pkinase
ENSOARG00000025667	19	54	40	81	60	79	0.295499	0.754441	0.525666	0.983078	0.761764	1.23136	37.6667	73.3333	-0.912239	0.0728073	0.880828	54.6405	-	17	34045215	34048697	+	3433	lincRNA	-	-
ENSOARG00000015082	7191	9187	9730	10494	6263	5072	156.711	179.851	179.172	178.465	111.419	110.775	8702.67	7276.33	0.363568	0.0729918	0.881361	7851.78	LIPA	22	10697729	10736804	-	2450	protein_coding	PF00561:alpha/beta hydrolase fold	Abhydrolase_1
ENSOARG00000021179	1301	2824	2404	2784	2812	3660	26.1041	50.9009	40.758	43.5914	46.0589	73.5981	2176.33	3085.33	-0.470341	0.0730401	0.881361	2614.53	ACTN1	7	77577780	77619469	-	2661	protein_coding	PF08726:Ca2+ insensitive EF hand|PF00435:Spectrin repeat|PF00307:Calponin homology (CH) domain	CH
ENSOARG00000016077	93	74	82	37	69	47	8.19383	5.85686	6.10471	2.54393	4.96272	4.15007	83	51	0.790138	0.0730805	0.881361	67.4019	-	4	77220745	77222489	+	606	protein_coding	-	-
ENSOARG00000009571	414	372	395	318	357	285	24.5604	19.8247	19.8006	14.7218	17.289	16.9447	393.667	320	0.390071	0.0731063	0.881361	356.039	LZTFL1	19	53388674	53405577	+	900	protein_coding	PF15294:Leucine zipper	-
ENSOARG00000023947	16	8	15	1	7	0	5.54723	2.49158	4.39434	0.270555	1.98116	0	13	2.66667	2.43955	0.0731533	0.881361	7.90749	RF00406	X	77610425	77610578	-	154	snoRNA	-	-
ENSOARG00000013757	8	5	7	2	0	0	0.148776	0.0835299	0.109999	0.0290251	0	0	6.66667	0.666667	3.49355	0.0732454	NA	3.72725	TMEM244	8	55189551	55203655	-	2871	protein_coding	-	-
ENSOARG00000009753	10	17	17	9	65	47	0.313886	0.479347	0.450887	0.220453	1.66553	1.47851	14.6667	40.3333	-1.43007	0.0733215	0.882621	27.4084	ANOS1	X	5718290	5783131	-	1701	protein_coding	PF00041:Fibronectin type III domain|PF00095:WAP-type (Whey Acidic Protein) 'four-disulfide core'	fn3
ENSOARG00000005986	12	37	18	9	12	2	0.131995	0.365601	0.1673	0.0772538	0.107752	0.0220476	22.3333	7.66667	1.66875	0.0733586	0.882621	14.803	MMP20	15	5595202	5661183	+	4854	protein_coding	PF00045:Hemopexin|PF00413:Matrixin|PF01471:Putative peptidoglycan binding domain	PG_binding_1
ENSOARG00000019481	228	65	107	179	355	237	16.4283	4.20727	6.51462	10.065	20.8811	17.1144	133.333	257	-0.82693	0.0737324	0.883282	194.844	SINHCAF	3	183379793	183392744	+	741	protein_coding	PF15396:Protein Family FAM60A	-
ENSOARG00000011443	2	1	15	1	0	0	0.182537	0.0819879	1.1568	0.0712231	0	0	6	0.333333	4.07796	0.0737407	NA	3.05549	-	14	52072690	52073274	+	585	protein_coding	PF00210:Ferritin-like domain	Ferritin
ENSOARG00000019826	6724	6257	9212	6696	4242	6520	1286.77	1075.64	1489.61	999.973	662.689	1250.47	7397.67	5819.33	0.403309	0.0737441	0.883282	6599.45	-	2	237679017	237679295	+	279	protein_coding	-	-
ENSOARG00000002279	5	31	23	50	45	46	0.198189	1.10382	0.770342	1.5466	1.45609	1.82734	19.6667	47	-1.21335	0.0737763	0.883282	32.5146	TSPAN6	X	126714765	126722301	+	1347	protein_coding	PF00335:Tetraspanin family	Tetraspannin
ENSOARG00000003422	79	132	104	234	106	190	2.32395	3.48821	2.58512	5.37175	2.5455	5.60154	105	176.667	-0.685206	0.0737869	0.883282	139.083	SMPD3	14	35060804	35070157	-	1815	protein_coding	-	-
ENSOARG00000025474	1003	1075	1219	1629	1292	1357	10.006	9.6338	10.2757	12.6818	10.5218	13.5673	1099	1426	-0.297517	0.073937	0.883282	1247.99	-	12	78017781	78023195	+	5352	lincRNA	-	-
ENSOARG00000013620	0	7	23	2	1	0	0	0.0714645	0.220871	0.0177376	0.00927748	0	10	1	3.39937	0.0739464	0.883282	5.25094	ADGRL2	1	57808412	58061674	+	4698	protein_coding	PF00002:7 transmembrane receptor (Secretin family)|PF02140:Galactose binding lectin domain|PF02793:Hormone receptor domain|PF01825:GPCR proteolysis site, GPS, motif|PF02354:Latrophilin Cytoplasmic C-terminal region|PF16489:GPCR-Autoproteolysis INducing (GAIN) domain|PF02191:Olfactomedin-like domain	7tm_2
ENSOARG00000018670	565	1199	1309	1017	595	668	22.75	43.3692	44.5369	31.9561	19.5577	26.9565	1024.33	760	0.49632	0.0739796	0.883282	877.055	FGL2	4	44004725	44008211	+	1326	protein_coding	PF00147:Fibrinogen beta and gamma chains, C-terminal globular domain	Fibrinogen_C
ENSOARG00000002333	12	0	14	0	2	0	0.249496	0	0.245955	0	0.0339452	0	8.66667	0.666667	3.83565	0.0740168	0.883282	4.7533	TMEM63C	7	85357829	85416748	+	2568	protein_coding	PF13967:Late exocytosis, associated with Golgi transport|PF14703:Cytosolic domain of 10TM putative phosphate transporter|PF02714:Calcium-dependent channel, 7TM region, putative phosphate	-
ENSOARG00000005740	102	118	58	57	77	38	3.95497	4.11011	1.90028	1.72472	2.43725	1.47666	92.6667	57.3333	0.816577	0.0740364	0.883282	75.1265	BPIFB6	13	61641482	61656002	+	1377	protein_coding	PF01273:LBP / BPI / CETP family, N-terminal domain|PF02886:LBP / BPI / CETP family, C-terminal domain	-
ENSOARG00000020714	66	100	128	139	225	121	3.7528	5.10787	6.1499	6.16774	10.4438	6.89525	98	161.667	-0.645819	0.0741097	0.883282	126.497	PTGDR	7	42251324	42256739	+	939	protein_coding	PF00001:7 transmembrane receptor (rhodopsin family)	7tm_1
ENSOARG00000019101	223	170	120	236	568	158	2.00512	1.37314	0.911726	1.65596	4.16919	1.42379	171	320.667	-0.760546	0.0741392	0.883282	239.64	MAP2	2	210230563	210374944	+	5938	protein_coding	PF00418:Tau and MAP protein, tubulin-binding repeat|PF08377:MAP2/Tau projection domain	Tubulin-binding
ENSOARG00000016670	415	508	534	902	554	574	14.5392	15.9876	15.8081	24.6603	15.8441	20.1538	485.667	676.667	-0.388958	0.0741699	0.883282	570.211	-	3	133174198	133183260	+	1524	protein_coding	PF00282:Pyridoxal-dependent decarboxylase conserved domain	-
ENSOARG00000005117	87	58	104	53	46	54	2.78484	1.66777	2.81294	1.3239	1.202	1.73232	83	51	0.773699	0.0742548	0.883692	67.2062	THBD	13	40956482	40958250	-	1668	protein_coding	PF12662:Complement Clr-like EGF-like|PF09064:Thrombomodulin like fifth domain, EGF-like|PF00059:Lectin C-type domain	Lectin_C
ENSOARG00000026230	0	0	2	12	2	9	0	0	0.0444266	0.246177	0.0429204	0.237117	0.666667	7.66667	-3.515	0.0744223	NA	4.05228	-	13	41135501	41273769	-	2031	lincRNA	PF00651:BTB/POZ domain	BTB
ENSOARG00000014578	499	144	97	70	166	33	16.2952	4.22426	2.67656	1.78385	4.42521	1.08001	246.667	89.6667	1.66625	0.0745989	0.886583	174.197	-	14	56170162	56176245	+	1635	protein_coding	PF13927:Immunoglobulin domain|PF07686:Immunoglobulin V-set domain	V-set
ENSOARG00000000400	174	262	136	268	319	303	6.60286	8.93126	4.36082	7.93629	9.88189	11.5234	190.667	296.667	-0.560485	0.0749601	0.890272	242.213	IQCC	2	234420779	234423294	-	1407	protein_coding	-	-
ENSOARG00000015100	1	16	0	0	0	0	0.0309879	0.44539	0	0	0	0	5.66667	0	5.01601	0.0749929	NA	2.86993	ANGPT1	9	69482154	69934561	+	1723	protein_coding	PF00147:Fibrinogen beta and gamma chains, C-terminal globular domain	Fibrinogen_C
ENSOARG00000012434	4	17	13	0	4	2	0.133064	0.508018	0.36542	0	0.108625	0.0666784	11.3333	2	2.53456	0.0752	0.892516	6.63392	FMO2	12	36915788	36955013	+	1605	protein_coding	PF00743:Flavin-binding monooxygenase-like	FMO-like
ENSOARG00000005338	201	208	263	203	203	96	5.60115	5.20683	6.19275	4.41446	4.61789	2.68106	224	167.333	0.533617	0.0754512	0.893691	192.41	ZFP82	14	46220306	46227470	+	1916	protein_coding	PF01352:KRAB box	KRAB
ENSOARG00000025294	0	0	0	2	4	7	0	0	0	0.0941594	0.196997	0.423238	0	4.33333	-4.55003	0.0754772	NA	2.2093	-	5	16405363	16601603	-	885	lincRNA	-	-
ENSOARG00000009269	3362	1949	2335	2183	2314	1710	396.256	206.357	232.548	200.786	222.643	201.989	2548.67	2069	0.416085	0.0755804	0.893691	2313.28	-	18	68591211	68595561	-	453	protein_coding	PF07654:Immunoglobulin C1-set domain	C1-set
ENSOARG00000005522	1810	1429	1574	1241	1473	1291	24.5777	17.4311	18.0599	13.1503	16.328	17.5688	1604.33	1335	0.35215	0.075767	0.893795	1472.56	SIPA1L3	14	47107216	47209152	+	3932	protein_coding	PF11881:C-terminal domain of SPAR protein|PF02145:Rap/ran-GAP	-
ENSOARG00000022023	1	1	0	14	4	4	0.503699	0.45248	0	5.50299	1.64474	2.01922	0.666667	7.33333	-3.29446	0.0758206	NA	3.75379	RF00026	2	198697777	198697882	+	106	snRNA	-	-
ENSOARG00000012095	483	701	676	634	536	366	11.6269	15.1587	13.7502	11.9098	10.5329	8.82978	620	512	0.37302	0.0758587	0.894276	557	STAMBP	3	95578861	95617305	+	2218	protein_coding	PF01398:JAB1/Mov34/MPN/PAD-1 ubiquitin protease|PF08969:USP8 dimerisation domain	Mov34
ENSOARG00000026548	12	26	29	12	10	2	0.142442	0.277242	0.290872	0.111157	0.0969	0.0237925	22.3333	8	1.6008	0.0760106	0.89495	14.8278	-	9	82943793	82976924	-	4498	lincRNA	-	-
ENSOARG00000022760	55	45	43	35	17	25	39.1542	28.7777	25.8661	19.4439	9.87941	17.8365	47.6667	25.6667	0.99118	0.0760181	0.89495	36.9599	RF00001	5	49008810	49008884	+	75	rRNA	-	-
ENSOARG00000019356	210	231	398	256	234	120	4.08315	4.03475	6.53892	3.88433	3.71414	2.33836	279.667	203.333	0.558746	0.0762769	0.896864	236.21	FGD4	3	181943569	182048775	-	2746	protein_coding	PF00621:RhoGEF domain|PF01363:FYVE zinc finger|PF00169:PH domain	RhoGEF
ENSOARG00000018118	452	691	542	782	668	920	52.2364	71.7367	52.9274	70.5248	63.0199	106.556	561.667	790	-0.439418	0.0763184	0.896864	673.566	OCIAD2	6	67495215	67504063	-	462	protein_coding	PF07051:Ovarian carcinoma immunoreactive antigen (OCIA)	-
ENSOARG00000014699	1155	1062	1286	1425	1746	1429	10.0404	8.29316	9.44615	9.66678	12.3902	12.4495	1167.67	1533.33	-0.312978	0.0764462	0.897166	1337.69	MBD4	19	56165908	56179281	+	6142	protein_coding	PF01429:Methyl-CpG binding domain	MBD
ENSOARG00000008819	2854	2917	4105	2974	3501	1798	33.0186	30.3159	40.1296	26.8501	33.0646	20.8472	3292	2757.67	0.356529	0.0764625	0.897166	2973.43	ROCK1	23	35320769	35444675	+	4615	protein_coding	PF00069:Protein kinase domain|PF08912:Rho Binding	Pkinase
ENSOARG00000014170	634	759	643	783	1119	890	7.27656	7.82542	6.23584	7.01292	10.4842	10.2372	678.667	930.667	-0.378266	0.0766207	0.897821	798.213	NABP1	2	192895716	192909059	+	4652	protein_coding	-	-
ENSOARG00000006661	361	444	632	887	636	508	1.91273	2.11328	2.8295	3.66749	2.75086	2.69751	479	677	-0.411246	0.0767855	0.89915	562.888	CDH23	25	27415341	27820109	+	10077	protein_coding	PF00028:Cadherin domain	Cadherin
ENSOARG00000012690	5	7	3	1	0	0	0.381918	0.480315	0.193628	0.0596073	0	0	5	0.333333	3.89872	0.0769518	NA	2.72581	-	5	4703968	4709099	+	699	protein_coding	-	-
ENSOARG00000010447	2041	2215	1941	2089	1741	1602	74.1314	72.2706	59.5706	59.2104	51.6208	58.3144	2065.67	1810.67	0.283565	0.0769583	0.900255	1928.09	EHD1	21	42394353	42414578	-	1470	protein_coding	PF12763:Cytoskeletal-regulatory complex EF hand|PF00350:Dynamin family	-
ENSOARG00000015811	608	569	891	575	730	276	7.57405	6.36745	9.37884	5.58975	7.42359	3.44578	689.333	527	0.500745	0.0769827	0.900255	596.309	EEA1	3	129010882	129136032	-	4286	protein_coding	PF01363:FYVE zinc finger	FYVE
ENSOARG00000012877	2607	4254	4192	4258	2662	2114	87.93	128.891	119.471	112.073	73.2943	71.4586	3684.33	3011.33	0.388325	0.0771727	0.901876	3283.66	CFP	X	53781130	53786565	+	1583	protein_coding	PF00090:Thrombospondin type 1 domain	TSP_1
ENSOARG00000024528	67	49	10	26	21	7	31.1067	20.4364	3.92307	9.42003	7.95911	3.2571	42	18	1.41398	0.0774581	0.903484	30.592	RF00001	2	231364538	231364652	-	115	rRNA	-	-
ENSOARG00000001468	219	363	365	693	502	269	8.77184	13.0612	12.3534	21.6611	16.4141	10.7982	315.667	488	-0.517019	0.0774651	0.903484	387.284	MAPK8	25	42344697	42375081	+	1333	protein_coding	PF00069:Protein kinase domain	Pkinase
ENSOARG00000026385	0	0	0	4	4	5	0	0	0	0.0779888	0.0815828	0.125198	0	4.33333	-4.49873	0.0775101	NA	2.12758	-	11	52833764	52836011	-	2137	lincRNA	-	-
ENSOARG00000011326	745	898	1005	888	661	685	105.23	113.944	119.949	97.8809	76.2172	96.9681	882.667	744.667	0.323511	0.077704	0.905422	806.54	-	3	163459367	163462868	-	378	protein_coding	PF06320:GCN5-like protein 1 (GCN5L1)	GCN5L1
ENSOARG00000002950	193	155	242	327	286	246	9.06303	6.53848	9.60237	11.983	10.9635	11.5772	196.667	286.333	-0.454359	0.0777346	0.905422	237.478	-	AMGL01127949.1	1370	7406	+	1137	protein_coding	PF12796:Ankyrin repeats (3 copies)	-
ENSOARG00000009228	0	8	8	0	0	0	0	0.342898	0.32254	0	0	0	5.33333	0	4.87864	0.0777836	NA	2.60525	CNTFR	2	36778009	36795204	+	1119	protein_coding	PF00041:Fibronectin type III domain	fn3
ENSOARG00000008215	2855	3810	4030	3837	2915	2581	129.291	154.995	154.211	135.598	107.763	117.14	3565	3111	0.282251	0.077798	0.905558	3294.24	LAMP1	10	85930276	85936337	+	1179	protein_coding	PF01299:Lysosome-associated membrane glycoprotein (Lamp)	-
ENSOARG00000020788	651	683	784	702	660	463	58.2215	54.8721	59.2468	48.9936	48.1851	41.4989	706	608.333	0.312119	0.0779195	0.905769	649.311	RAB8B	7	43816684	43835844	-	597	protein_coding	PF00071:Ras family	Ras
ENSOARG00000017047	0	1	0	2	3	11	0	0.00732258	0	0.0127223	0.0199629	0.0898632	0.333333	5.33333	-3.92836	0.0780167	NA	2.97138	ALDH1L2	3	173626773	173689562	-	6550	protein_coding	PF00551:Formyl transferase|PF00171:Aldehyde dehydrogenase family|PF02911:Formyl transferase, C-terminal domain	Aldedh
ENSOARG00000003400	803	1018	1094	1268	1235	1294	5.82842	6.63761	6.70964	7.18215	7.3176	9.41289	971.667	1265.67	-0.317582	0.0780548	0.906317	1108.28	RALGAPA2	13	39012000	39247904	-	7356	protein_coding	PF02145:Rap/ran-GAP	-
ENSOARG00000010487	132	199	175	386	397	108	6.40123	8.66904	7.17091	14.6075	15.7162	5.24888	168.667	297	-0.6804	0.0780702	0.906317	222.679	UBXN8	26	25551976	25570062	+	1101	protein_coding	PF00789:UBX domain	UBX
ENSOARG00000001887	9	0	6	0	0	0	0.461603	0	0.26003	0	0	0	5	0	4.88504	0.078221	NA	2.62537	GAL3ST3	21	43430185	43436179	-	1041	protein_coding	PF06990:Galactose-3-O-sulfotransferase	-
ENSOARG00000014813	163	162	137	103	120	110	15.5966	13.9247	11.0767	7.69095	9.37325	10.5485	154	111	0.556694	0.0783853	0.907702	133.072	IFT22	24	35319511	35323830	+	558	protein_coding	PF08477:Ras of Complex, Roc, domain of DAPkinase	-
ENSOARG00000007758	144	69	80	101	46	13	6.65667	2.86532	3.12487	3.64348	1.73588	0.602271	97.6667	53.3333	1.07026	0.078445	0.907702	75.2323	-	3	83938173	84030399	+	1155	protein_coding	PF01699:Sodium/calcium exchanger protein	Na_Ca_ex
ENSOARG00000011215	1087	1196	1323	1192	1168	826	24.9622	24.6725	25.672	21.3614	21.8959	19.0102	1202	1062	0.273317	0.0784485	0.907702	1118.54	-	X	93574458	93589879	-	2325	protein_coding	PF00076:RNA recognition motif. (a.k.a. RRM, RBD, or RNP domain)	RRM_1
ENSOARG00000016642	3801	4979	4064	6295	4459	6738	84.6655	99.6276	76.4908	109.422	81.0798	150.416	4281.33	5830.67	-0.386373	0.0787423	0.909899	5042.47	ITGB7	3	133139887	133148491	+	2397	protein_coding	PF17205:Integrin plexin domain|PF00362:Integrin beta chain VWA domain|PF08725:Integrin beta cytoplasmic domain	-
ENSOARG00000001278	4094	3424	2944	2964	2902	2863	809.582	608.241	491.923	457.395	468.465	567.398	3487.33	2909.67	0.354389	0.0788948	0.911061	3212.27	-	21	43400156	43400896	+	270	protein_coding	-	-
ENSOARG00000011661	2	43	17	43	11	135	0.0369879	0.714376	0.26566	0.620581	0.166069	2.50217	20.6667	63	-1.68497	0.0789584	0.911194	43.4309	SORCS2	6	113430900	113516223	+	2887	protein_coding	PF15901:Sortilin, neurotensin receptor 3, C-terminal|PF15902:Sortilin, neurotensin receptor 3,|PF00801:PKD domain	-
ENSOARG00000002740	238	267	222	153	259	124	8.62682	8.69389	6.79945	4.32778	7.66373	4.50453	242.333	178.667	0.545685	0.0790719	0.911904	209.207	HSF4	14	34151661	34156397	+	1473	protein_coding	PF00447:HSF-type DNA-binding	HSF_DNA-bind
ENSOARG00000019319	437	302	606	374	427	213	4.8792	3.02902	5.71724	3.25866	3.8919	2.38342	448.333	338	0.5133	0.0791878	0.912497	387.316	GSTM3	1	86230621	86237871	-	4782	protein_coding	PF00043:Glutathione S-transferase, C-terminal domain|PF02798:Glutathione S-transferase, N-terminal domain	GST_N
ENSOARG00000003614	62	45	80	50	37	24	0.873663	0.569631	0.952552	0.549822	0.425618	0.338935	62.3333	37	0.861144	0.0792298	0.912497	49.1618	-	1	232510921	232515741	-	3789	protein_coding	PF11732:Transcription- and export-related complex subunit|PF16134:THO complex subunit 2 N-terminus|PF11262:Transcription factor/nuclear export subunit protein 2	-
ENSOARG00000001202	581	636	1253	2251	788	938	15.1395	14.8875	27.5888	45.7731	16.7621	24.4958	823.333	1325.67	-0.595254	0.0793341	0.912497	1036.65	PLK3	1	19251263	19255855	+	2049	protein_coding	PF00659:POLO box duplicated region|PF00069:Protein kinase domain	Pkinase
ENSOARG00000001224	41	47	25	31	14	10	3.44194	3.54443	1.7734	2.03087	0.959432	0.841343	37.6667	18.3333	1.18229	0.0793729	0.912497	28.0003	-	JH922606.1	1559	2497	+	636	protein_coding	PF13895:Immunoglobulin domain	-
ENSOARG00000009723	2889	3436	3944	4401	4519	3916	51.7964	55.3393	59.7497	61.5749	66.1395	70.3636	3423	4278.67	-0.247177	0.0794418	0.912497	3800.6	ESYT2	4	118828806	118878542	-	2978	protein_coding	PF17047:Synaptotagmin-like mitochondrial-lipid-binding domain|PF00168:C2 domain	C2
ENSOARG00000008407	5638	6003	6525	8617	7347	6609	52.1074	49.8392	50.9567	62.1485	55.4308	61.2158	6055.33	7524.33	-0.226067	0.0795312	0.912497	6700.68	BAZ2A	3	162731452	162759094	+	5777	protein_coding	PF00628:PHD-finger|PF02791:DDT domain|PF00439:Bromodomain|PF01429:Methyl-CpG binding domain|PF15613:Williams-Beuren syndrome DDT (WSD), D-TOX E motif	MBD
ENSOARG00000010272	55	64	86	185	169	45	1.72334	1.80142	2.27694	4.52355	4.32275	1.4131	68.3333	133	-0.825893	0.079632	0.912497	95.7487	DUSP4	26	24368527	24381810	-	1704	protein_coding	PF00782:Dual specificity phosphatase, catalytic domain|PF00581:Rhodanese-like domain	DSPc
ENSOARG00000000609	164	210	158	169	129	99	2.88131	3.31432	2.34558	2.31704	1.85013	1.74315	177.333	132.333	0.528256	0.0797271	0.912497	153.573	-	X	35701365	35761802	-	3039	protein_coding	PF00415:Regulator of chromosome condensation (RCC1) repeat	-
ENSOARG00000013284	204	54	92	93	73	40	6.31419	1.50145	2.40615	2.24632	1.84449	1.2408	116.667	68.6667	0.932542	0.0798185	0.912497	93.7916	NT5E	8	51074264	51143134	-	1725	protein_coding	PF02872:5'-nucleotidase, C-terminal domain|PF00149:Calcineurin-like phosphoesterase	Metallophos
ENSOARG00000007783	403	743	536	693	748	980	12.3661	20.4807	13.8976	16.5944	18.7368	30.1375	560.667	807	-0.484514	0.079854	0.912497	682.634	ASMTL	X	621541	640694	-	1740	protein_coding	PF00891:O-methyltransferase|PF02545:Maf-like protein|PF16864:Dimerisation domain	Maf
ENSOARG00000014243	46	55	95	52	42	17	3.27471	3.51728	5.7146	2.88881	2.44079	1.21288	65.3333	37	0.928872	0.0798656	0.912497	49.973	TNFSF13	11	26851678	26853534	+	750	protein_coding	PF00229:TNF(Tumour Necrosis Factor) family	-
ENSOARG00000014645	0	0	0	3	15	0	0	0	0	0.213669	1.11758	0	0	6	-4.86216	0.0798819	NA	2.72651	TNFSF18	12	38815643	38823860	-	585	protein_coding	-	-
ENSOARG00000018088	241	284	378	230	221	239	8.24839	8.73171	10.9318	6.14299	6.17463	8.19792	301	230	0.447024	0.0799788	0.912497	264.165	-	X	63312122	63314386	+	1560	protein_coding	PF00400:WD domain, G-beta repeat|PF12265:Histone-binding protein RBBP4 or subunit C of CAF1 complex	WD40
ENSOARG00000016471	939	962	1051	1148	677	623	44.2109	40.6881	41.8132	42.1799	26.0207	29.3972	984	816	0.375348	0.0800031	0.912497	889.497	FAM49A	3	24714690	24770989	-	1134	protein_coding	PF07159:Protein of unknown function (DUF1394)	-
ENSOARG00000003184	477	647	351	219	270	474	102.281	124.626	63.5962	36.6456	47.2615	101.861	491.667	321	0.647392	0.0800089	0.912497	414.533	NUPR1	24	26091081	26091741	-	249	protein_coding	-	-
ENSOARG00000020697	285	350	348	371	239	133	8.37004	9.23378	8.63592	8.5027	5.7299	3.91461	327.667	247.667	0.528383	0.0800716	0.9125	282.22	GNB4	1	205841021	205907579	+	1818	protein_coding	PF00400:WD domain, G-beta repeat	WD40
ENSOARG00000006295	70	133	339	107	122	87	9.09354	15.5208	37.2119	10.8472	12.9378	11.3268	180.667	105.333	0.81844	0.0801581	0.9125	139.368	-	X	75853931	75854341	-	411	protein_coding	PF01042:Endoribonuclease L-PSP	Ribonuc_L-PSP
ENSOARG00000002079	77	486	239	477	317	1942	2.23434	12.6685	5.86008	10.8013	7.50904	56.4757	267.333	912	-1.84646	0.080191	0.9125	614.216	-	12	1246745	1255861	+	1840	protein_coding	PF00505:HMG (high mobility group) box	HMG_box
ENSOARG00000007637	6	10	6	32	16	18	0.131562	0.196973	0.111167	0.547555	0.286394	0.395552	7.33333	22	-1.48537	0.0802802	0.9125	14.2143	LMCD1	19	17798561	17829006	-	2435	protein_coding	PF06297:PET Domain|PF00412:LIM domain	LIM
ENSOARG00000014296	134	126	96	233	312	93	5.27232	4.45345	3.19165	7.15407	10.0212	3.66719	118.667	212.667	-0.695117	0.0804161	0.9125	160.24	KLHDC8B	19	50799872	50803603	-	1357	protein_coding	PF01344:Kelch motif|PF13415:Galactose oxidase, central domain	Kelch_1
ENSOARG00000013509	1749	998	799	1213	934	542	17.2484	8.84133	6.65813	9.33511	7.5192	5.35687	1182	896.333	0.557644	0.0804559	0.9125	1040.3	CD274	2	73044621	73061206	+	5414	protein_coding	PF08205:CD80-like C2-set immunoglobulin domain|PF07686:Immunoglobulin V-set domain	V-set
ENSOARG00000014887	2589	2539	2596	2545	2548	1827	54.5725	48.0765	46.2374	41.8629	43.8437	38.5952	2574.67	2306.67	0.259364	0.0805209	0.9125	2419.72	NUGGC	2	101230656	101280194	-	2533	protein_coding	PF00350:Dynamin family	-
ENSOARG00000026785	9	2	0	33	21	6	0.129943	0.0259399	0	0.371812	0.247512	0.086819	3.66667	20	-2.20832	0.0805944	0.9125	11.1521	-	26	5716750	5726462	-	3698	lincRNA	-	-
ENSOARG00000007693	65	132	19	28	38	37	4.84028	8.82999	1.19552	1.62711	2.30998	2.7613	72	34.3333	1.15143	0.0806167	0.9125	54.0493	NUDT7	14	4353265	4361157	+	717	protein_coding	PF00293:NUDIX domain	NUDIX
ENSOARG00000003427	177	82	35	259	276	104	2.82861	1.17718	0.472623	3.22998	3.60061	1.66566	98	213	-0.930115	0.0807384	0.9125	151.596	RANBP17	16	2845336	3188069	+	3341	protein_coding	PF03810:Importin-beta N-terminal domain	-
ENSOARG00000000900	0	0	0	5	4	4	0	0	0	0.157466	0.131778	0.161782	0	4.33333	-4.4725	0.0807636	NA	2.08673	GCNT3	7	47666417	47667739	-	1323	protein_coding	PF02485:Core-2/I-Branching enzyme	-
ENSOARG00000003403	11	120	58	137	106	380	0.208489	2.04315	0.928891	2.02633	1.64007	7.21817	63	207.667	-1.77177	0.08077	0.9125	138.458	-	3	206786488	206816410	+	2817	protein_coding	PF00530:Scavenger receptor cysteine-rich domain	SRCR
ENSOARG00000014152	0	1	0	9	8	1	0	0.0405777	0	0.31725	0.294996	0.0452702	0.333333	6	-3.89956	0.0808925	NA	2.88812	ACP4	14	55904220	55908942	+	1182	protein_coding	PF00328:Histidine phosphatase superfamily (branch 2)	Acid_phosphat_A
ENSOARG00000002448	2237	3590	3969	4518	3760	4873	32.6066	47.007	48.8841	51.3909	44.7398	71.1852	3265.33	4383.67	-0.380214	0.0809186	0.9125	3788.79	ATP8B2	1	103159099	103176896	+	3663	protein_coding	PF16212:Phospholipid-translocating P-type ATPase C-terminal|PF13246:Cation transport ATPase (P-type)|PF16209:Phospholipid-translocating ATPase N-terminal|PF00122:E1-E2 ATPase	E1-E2_ATPase
ENSOARG00000012999	249	83	136	114	94	91	4.54673	1.36146	2.09838	1.62444	1.40118	1.66531	156	99.6667	0.768817	0.0809517	0.9125	129.785	ZC3H12C	15	19647456	19728927	+	2924	protein_coding	PF11977:Zc3h12a-like Ribonuclease NYN domain	-
ENSOARG00000009887	1234	1703	1513	1431	1323	1130	32.6006	40.416	33.7751	29.5019	28.5323	29.9187	1483.33	1294.67	0.279842	0.0809679	0.9125	1376.27	CHST15	22	42601148	42636827	-	2021	protein_coding	PF13469:Sulfotransferase family	-
ENSOARG00000014815	346	290	321	359	124	193	12.7492	9.5992	9.99448	10.3229	3.72989	7.1272	319	225.333	0.609311	0.0810142	0.9125	271.17	IFIT5	22	10834532	10835980	+	1449	protein_coding	PF13424:Tetratricopeptide repeat	-
ENSOARG00000015807	14	20	32	11	11	3	0.144192	0.185042	0.278489	0.0884106	0.0924849	0.0309661	22	8.33333	1.50864	0.0810242	0.9125	14.8616	UNC13A	5	5200073	5254985	+	5184	protein_coding	PF06292:Domain of Unknown Function (DUF1041)|PF00168:C2 domain|PF10540:Munc13 (mammalian uncoordinated) homology domain|PF00130:Phorbol esters/diacylglycerol binding domain (C1 domain)	C2
ENSOARG00000010459	1608	850	1897	904	1094	1207	47.4859	22.5489	47.3361	20.8328	26.3732	35.7223	1451.67	1068.33	0.501613	0.0810571	0.9125	1266.13	KBTBD8	19	34470384	34479730	-	1808	protein_coding	PF01344:Kelch motif|PF00651:BTB/POZ domain|PF07707:BTB And C-terminal Kelch	BACK
ENSOARG00000018572	78	117	225	92	99	77	5.0664	6.82684	12.3491	4.66329	5.24936	5.01244	140	89.3333	0.702313	0.0810665	0.9125	112.606	CDK6	4	9837145	10086661	-	822	protein_coding	PF00069:Protein kinase domain	Pkinase
ENSOARG00000008204	82	117	129	169	139	204	2.96623	3.80194	3.943	4.77065	4.10461	7.39561	109.333	170.667	-0.598872	0.0810937	0.9125	139.242	IPPK	2	28514559	28572100	+	1476	protein_coding	PF06090:Inositol-pentakisphosphate 2-kinase	-
ENSOARG00000007454	55	18	104	27	37	21	2.31956	0.681937	3.70615	0.888601	1.27383	0.887597	59	28.3333	1.13648	0.081103	0.9125	43.2035	KCNG3	3	81528414	81578926	+	1266	protein_coding	PF00520:Ion transport protein|PF02214:BTB/POZ domain	Ion_trans
ENSOARG00000018646	0	0	0	0	0	19	0	0	0	0	0	0.272203	0	6.33333	-5.23314	0.081171	NA	3.54804	-	5	99691590	99809576	-	3735	protein_coding	PF00595:PDZ domain (Also known as DHR or GLGF)|PF00169:PH domain	PH
ENSOARG00000020861	13950	15786	13528	17156	10791	9151	155.138	157.705	127.123	148.889	97.9655	101.992	14421.3	12366	0.334009	0.0811712	0.912663	13242.9	CTSS	1	99623159	99650475	-	4801	protein_coding	-	-
ENSOARG00000011284	35	45	109	32	30	36	8.53298	9.85539	22.4546	6.08811	5.97063	8.79607	63	32.6667	0.976915	0.0812217	0.912663	47.2556	-	14	45788935	45789153	+	219	protein_coding	-	-
ENSOARG00000015971	445	602	813	915	612	1185	4.68444	5.69276	7.23161	7.51655	5.25915	12.5017	620	904	-0.519638	0.0812987	0.912943	760.478	IGSF6	24	20160197	20173772	-	5072	protein_coding	PF07686:Immunoglobulin V-set domain	V-set
ENSOARG00000012386	3434	3427	5059	4014	3847	2290	29.871	26.7789	37.1844	27.2475	27.3173	19.9636	3973.33	3383.67	0.331566	0.0813752	0.913217	3614.15	PHF3	9	12832147	12908695	-	6138	protein_coding	PF00628:PHD-finger|PF07744:SPOC domain|PF07500:Transcription factor S-II (TFIIS), central domain	PHD
ENSOARG00000013455	109	174	150	37	75	128	3.42741	4.91493	3.98545	0.907906	1.92516	4.03369	144.333	80	0.851525	0.0814404	0.913363	113.938	TSKS	14	55148178	55163410	-	1698	protein_coding	PF15358:Testis-specific serine kinase substrate	-
ENSOARG00000011910	548	473	487	552	323	330	15.6047	12.0994	11.7179	12.2663	7.50835	9.41766	502.667	401.667	0.431681	0.0815054	0.913364	449.84	LIMK1	24	33160196	33182974	-	1875	protein_coding	PF00595:PDZ domain (Also known as DHR or GLGF)|PF07714:Protein tyrosine kinase|PF00412:LIM domain	Pkinase_Tyr
ENSOARG00000005868	230	546	433	628	611	519	7.66553	16.3469	12.1941	16.3333	16.6235	17.3355	403	586	-0.473123	0.0815969	0.913364	484.601	RINL	14	47767747	47774069	-	1602	protein_coding	PF02204:Vacuolar sorting protein 9 (VPS9) domain	VPS9
ENSOARG00000008978	63	85	104	105	143	160	1.76202	2.13559	2.45782	2.29171	3.26493	4.48481	84	136	-0.655089	0.0818025	0.913921	109.442	ZNF283	14	51115840	51127174	+	1909	protein_coding	PF01352:KRAB box	KRAB
ENSOARG00000005943	155	177	210	281	231	265	13.7243	14.0787	15.7118	19.4163	16.697	23.5158	180.667	259	-0.452455	0.0818032	0.913921	217.475	-	X	62165878	62166480	-	603	protein_coding	PF00076:RNA recognition motif. (a.k.a. RRM, RBD, or RNP domain)	RRM_1
ENSOARG00000014924	5	16	0	38	17	27	0.234587	0.674347	0	1.39129	0.651103	1.26956	7	27.3333	-1.86813	0.0818791	0.914186	16.7951	-	19	6121576	6314673	-	1138	protein_coding	PF15409:Pleckstrin homology domain	-
ENSOARG00000013932	117	155	129	181	235	184	9.55179	11.3674	8.89888	11.5313	15.6615	15.0546	133.667	200	-0.502212	0.0824566	0.91508	164.804	GH	11	47540169	47541799	-	654	protein_coding	PF00103:Somatotropin hormone family	-
ENSOARG00000006285	906	1130	1425	1498	1594	1392	31.5958	35.4004	41.9917	40.7674	45.3792	48.6513	1153.67	1494.67	-0.305985	0.0825394	0.91508	1305.18	DEAF1	21	49408940	49432672	+	1531	protein_coding	PF01753:MYND finger|PF01342:SAND domain	SAND
ENSOARG00000017585	319	271	316	297	268	148	12.0283	9.17934	10.0681	8.73917	8.24926	5.59279	302	237.667	0.46599	0.08263	0.91508	266.685	ERO1A	7	11269380	11320324	+	1416	protein_coding	PF04137:Endoplasmic Reticulum Oxidoreductin 1 (ERO1)	-
ENSOARG00000008154	10	23	13	43	41	25	0.342257	0.707145	0.375961	1.14847	1.14552	0.857523	15.3333	36.3333	-1.14555	0.0826794	0.91508	24.9725	CLNK	6	105007690	105314820	-	1560	protein_coding	PF00017:SH2 domain	SH2
ENSOARG00000019715	0	1	0	9	6	2	0	0.0131261	0	0.102624	0.0715692	0.0292881	0.333333	5.66667	-3.83428	0.0826913	NA	2.76967	MOV10L1	3	223725004	223785201	+	3654	protein_coding	PF13086:AAA domain|PF13087:AAA domain	-
ENSOARG00000009696	11	132	195	83	26	37	0.752965	8.1168	11.2788	4.43364	1.45285	2.53827	112.667	48.6667	1.25887	0.082823	0.91508	77.9721	ELANE	5	40802228	40804271	+	780	protein_coding	PF00089:Trypsin	Trypsin
ENSOARG00000014470	549	418	521	754	582	756	6.79941	4.65054	5.45234	7.28736	5.88421	9.3837	496	697.333	-0.41612	0.0829767	0.91508	594.712	IFT122	19	56099199	56165469	-	4311	protein_coding	PF00400:WD domain, G-beta repeat	WD40
ENSOARG00000011674	229	493	314	371	471	778	8.70854	16.8417	10.0899	11.0099	14.6217	29.6512	345.333	540	-0.631056	0.0830081	0.91508	446.243	MATK	5	17757911	17764228	+	1404	protein_coding	PF07714:Protein tyrosine kinase|PF00018:SH3 domain	Pkinase_Tyr
ENSOARG00000001860	10	9	13	3	4	0	0.68982	0.557708	0.75775	0.161494	0.225249	0	10.6667	2.33333	2.3415	0.0830478	0.91508	6.47483	BEAN1	14	33582892	33590230	+	774	protein_coding	-	-
ENSOARG00000001142	1442	1721	2032	2435	2086	2091	29.6349	31.7722	35.2865	39.0514	34.996	43.0671	1731.67	2204	-0.276091	0.0831359	0.91508	1942.38	ITPKB	12	27809785	27912334	-	2598	protein_coding	PF03770:Inositol polyphosphate kinase	-
ENSOARG00000014706	864	1138	1127	1367	1507	1147	7.66546	9.06975	8.4488	9.4644	10.9145	10.1986	1043	1340.33	-0.280001	0.0831445	0.91508	1173.49	LSM14B	13	54364727	54376906	-	6018	protein_coding	PF09532:FDF domain|PF12701:Scd6-like Sm domain	-
ENSOARG00000016093	485	522	426	715	685	546	7.69544	7.44031	5.71147	8.85315	8.87256	8.68236	477.667	648.667	-0.342592	0.0832274	0.91508	556.032	FAN1	18	26392642	26413577	+	3365	protein_coding	PF08774:VRR-NUC domain	-
ENSOARG00000020049	1	0	2	8	6	9	0.0611593	0	0.103357	0.381815	0.299558	0.551644	1	7.66667	-2.89438	0.0832324	NA	4.26554	-	1	13912129	13940208	+	873	protein_coding	PF00688:TGF-beta propeptide|PF00019:Transforming growth factor beta like domain	TGFb_propeptide
ENSOARG00000018981	157	113	174	102	121	95	4.09705	2.64898	3.83678	2.07717	2.57764	2.48455	148	106	0.567739	0.0832428	0.91508	126.784	GPSM2	1	85404486	85438161	+	2046	protein_coding	PF13424:Tetratricopeptide repeat|PF02188:GoLoco motif	-
ENSOARG00000018580	443	264	296	273	261	229	6.7502	3.61364	3.81111	3.2462	3.24653	3.49705	334.333	254.333	0.503053	0.0832482	0.91508	296.025	AASS	4	86524777	86606070	-	3504	protein_coding	PF05222:Alanine dehydrogenase/PNT, N-terminal domain|PF03435:Saccharopine dehydrogenase NADP binding domain|PF16653:Saccharopine dehydrogenase C-terminal domain	Saccharop_dh
ENSOARG00000021049	1170	1317	1122	863	1284	849	144.604	146.22	117.174	83.2346	129.546	105.161	1203	998.667	0.359187	0.0832646	0.91508	1096.56	-	3	204762692	204765153	+	432	protein_coding	PF00059:Lectin C-type domain	Lectin_C
ENSOARG00000017994	4757	3610	5769	8744	7096	4131	37.7394	25.7275	38.6731	54.1342	45.956	32.8451	4712	6657	-0.381144	0.0833427	0.91508	5533.18	LNPEP	5	93687872	93788740	+	6730	protein_coding	PF11838:ERAP1-like C-terminal domain|PF01433:Peptidase family M1 domain	-
ENSOARG00000015487	2487	2239	3278	2266	2837	1695	36.7625	29.7312	40.9435	26.139	34.2338	25.1103	2668	2266	0.329109	0.0833474	0.91508	2436.85	ZBTB38	1	245558610	245562221	-	3612	protein_coding	PF00651:BTB/POZ domain	BTB
ENSOARG00000011264	5	22	10	3	5	0	0.174142	0.688313	0.294294	0.0815372	0.142158	0	12.3333	2.66667	2.34358	0.0834633	0.91508	7.40188	TCP11	20	9185364	9216633	-	1533	protein_coding	PF05794:T-complex protein 11	-
ENSOARG00000017424	13	29	29	53	60	35	0.741556	1.48603	1.3978	2.35927	2.79395	2.00089	23.6667	49.3333	-0.978075	0.083528	0.91508	35.2905	CNN3	1	71197685	71203535	-	936	protein_coding	PF00402:Calponin family repeat|PF00307:Calponin homology (CH) domain	CH
ENSOARG00000011122	760	907	919	1006	382	569	65.6601	70.3921	67.0889	67.8245	26.9413	49.2668	862	652.333	0.495597	0.0836593	0.91508	750.243	CLEC3B	19	54058404	54064238	-	618	protein_coding	PF00059:Lectin C-type domain	Lectin_C
ENSOARG00000019634	980	2020	1191	1639	1923	2512	134.165	248.423	137.775	175.102	214.911	344.656	1397	2024.67	-0.49683	0.0836913	0.91508	1711.2	YPEL5	3	36877149	36879012	+	390	protein_coding	PF03226:Yippee zinc-binding/DNA-binding /Mis18, centromere assembly	-
ENSOARG00000002773	465	672	714	532	486	494	24.4123	31.6923	31.6738	21.7955	20.8285	25.9918	617	504	0.356823	0.0837567	0.91508	556.175	GMDS	20	50065679	50397477	+	1017	protein_coding	PF16363:GDP-mannose 4,6 dehydratase	-
ENSOARG00000016780	0	20	0	0	0	0	0	0.505405	0	0	0	0	6.66667	0	5.24116	0.083806	NA	3.35439	BTNL2	20	25793691	25811932	+	1898	protein_coding	PF07686:Immunoglobulin V-set domain	V-set
ENSOARG00000006826	23	45	25	65	68	49	0.234937	0.41292	0.21578	0.518129	0.567022	0.501619	31	60.6667	-0.878105	0.0838114	0.91508	44.7921	LTBP4	14	49041927	49069895	+	5227	protein_coding	PF07645:Calcium-binding EGF domain|PF00683:TB domain	EGF_CA
ENSOARG00000011012	224	260	284	269	167	160	11.7253	12.2258	12.5615	10.9883	7.13608	8.39364	256	198.667	0.460189	0.0838426	0.91508	224.821	C5AR2	14	53396873	53397914	+	1020	protein_coding	PF00001:7 transmembrane receptor (rhodopsin family)	7tm_1
ENSOARG00000013179	2290	2525	2108	2705	1673	1474	46.9719	46.5257	36.5359	43.2982	28.0133	30.3008	2307.67	1950.67	0.354675	0.0838777	0.91508	2108.46	LAMP2	X	99141527	99175638	-	2603	protein_coding	PF01299:Lysosome-associated membrane glycoprotein (Lamp)	-
ENSOARG00000015445	70	92	73	184	96	113	8.77334	10.3582	7.73102	17.9964	9.82211	14.1938	78.3333	131	-0.646365	0.0838913	0.91508	102.601	-	4	105193171	105193875	+	426	protein_coding	PF07686:Immunoglobulin V-set domain	V-set
ENSOARG00000010904	165	245	191	351	251	272	4.77749	6.37251	4.673	7.93091	5.93275	7.89293	200.333	291.333	-0.459047	0.0839706	0.91508	242.314	BICDL1	17	62023701	62101919	+	1844	protein_coding	PF04849:HAP1 N-terminal conserved region	-
ENSOARG00000012578	5	8	0	47	16	4	0.700683	1.00709	0	5.13984	1.83037	0.561779	4.33333	22.3333	-2.15537	0.0840033	0.91508	12.3187	-	17	70322461	70322931	+	381	protein_coding	PF07686:Immunoglobulin V-set domain	V-set
ENSOARG00000011240	735	907	816	1133	1013	1065	41.2652	45.7438	38.7109	49.6394	46.4272	59.9238	819.333	1070.33	-0.31086	0.084058	0.91508	936.749	ELP5	11	26594896	26600422	+	951	protein_coding	PF10483:Elongator subunit Iki1	-
ENSOARG00000016108	290	386	383	472	429	584	8.74785	10.4597	9.76223	11.1108	10.564	17.6551	353	495	-0.438907	0.0841616	0.91508	422.663	LZTS2	22	20984288	20988117	+	1770	protein_coding	PF06818:Fez1	Fez1
ENSOARG00000006702	8	40	32	66	28	88	0.295392	1.32677	0.998401	1.90175	0.843982	3.25645	26.6667	60.6667	-1.18714	0.0842697	0.91508	43.5878	-	12	49482797	49487927	-	1446	protein_coding	PF00017:SH2 domain|PF00102:Protein-tyrosine phosphatase	Y_phosphatase
ENSOARG00000025713	200	289	319	397	346	385	7.44659	9.66616	10.0361	11.535	10.5165	14.3662	269.333	376	-0.421403	0.0842803	0.91508	318.742	-	17	71560277	71561805	-	1434	lincRNA	-	-
ENSOARG00000011968	6	20	44	58	20	94	0.328904	0.984864	2.03806	2.48111	0.894982	5.16415	23.3333	57.3333	-1.33817	0.0843565	0.91508	40.4885	RPH3AL	11	21970148	22057306	+	974	protein_coding	PF02318:FYVE-type zinc finger	-
ENSOARG00000010576	139	85	206	121	98	70	15.3654	8.44068	19.2417	10.4379	8.84346	7.75499	143.333	96.3333	0.669248	0.0844107	0.91508	118.38	SPA17	21	27380110	27391690	+	483	protein_coding	PF00612:IQ calmodulin-binding motif|PF02197:Regulatory subunit of type II PKA R-subunit	RIIa
ENSOARG00000002177	536	710	575	720	426	293	29.9353	35.621	27.1352	31.3799	19.422	16.3999	607	479.667	0.461541	0.0844379	0.91508	534.567	RAB32	8	70794656	70821946	+	956	protein_coding	PF00071:Ras family	Ras
ENSOARG00000012001	959	1205	1312	1595	1367	1553	21.2021	23.9318	24.5098	27.5182	24.6714	34.41	1158.67	1505	-0.313597	0.0844584	0.91508	1319.37	MLXIP	17	52815653	52870280	-	2415	protein_coding	PF00010:Helix-loop-helix DNA-binding domain	HLH
ENSOARG00000020551	16	45	22	37	70	68	0.545861	1.37912	0.634208	0.985064	1.94952	2.32501	27.6667	58.3333	-1.03462	0.0844683	0.91508	42.7819	-	1	199461568	199480423	-	1565	protein_coding	PF05368:NmrA-like family	NmrA
ENSOARG00000004421	252	316	264	247	192	212	26.5381	29.894	23.492	20.2986	16.5058	22.3748	277.333	217	0.434309	0.0845709	0.91508	246.59	CDKN2C	1	25193886	25197806	+	507	protein_coding	PF12796:Ankyrin repeats (3 copies)	-
ENSOARG00000008368	207	599	655	358	460	174	1.12502	2.92445	3.00799	1.51835	2.04086	0.947744	487	330.667	0.646138	0.0845832	0.91508	397.411	CENPF	12	67064453	67123889	-	9824	protein_coding	PF10490:Rb-binding domain of kinetochore protein Cenp-F/LEK1|PF10473:Leucine-rich repeats of kinetochore protein Cenp-F/LEK1|PF10481:Cenp-F N-terminal domain	-
ENSOARG00000020803	70	35	34	20	33	20	0.487027	0.218752	0.199885	0.108589	0.187428	0.139456	46.3333	24.3333	1.05205	0.0846012	0.91508	35.9771	TLN2	7	44271374	44489174	-	7674	protein_coding	PF09379:FERM N-terminal domain|PF00373:FERM central domain|PF08913:Vinculin Binding Site|PF01608:I/LWEQ domain|PF09141:Talin, middle domain|PF16511:N-terminal or F0 domain of Talin-head FERM	Band_41
ENSOARG00000004697	76	61	94	116	131	124	1.50791	1.08723	1.57593	1.79606	2.12178	2.46569	77	123.667	-0.612435	0.0846654	0.91508	99.3119	IQCE	24	40511246	40551800	+	2691	protein_coding	-	-
ENSOARG00000017877	630	2487	1082	2323	2329	5284	36.8827	130.794	53.5249	106.128	111.306	310.026	1399.67	3312	-1.2526	0.0846654	0.91508	2386.44	-	4	82602285	82628909	+	912	protein_coding	PF07654:Immunoglobulin C1-set domain|PF07686:Immunoglobulin V-set domain	V-set
ENSOARG00000016826	13	7	20	32	28	37	0.33991	0.164417	0.441873	0.652937	0.597648	0.969564	13.3333	32.3333	-1.22578	0.084733	0.91508	22.6063	KLHL13	X	111255164	111374719	+	2042	protein_coding	PF00651:BTB/POZ domain|PF07707:BTB And C-terminal Kelch|PF01344:Kelch motif	BACK
ENSOARG00000023394	62	108	85	171	124	115	48.681	76.1764	56.3941	104.777	79.4797	90.4939	85	136.667	-0.599719	0.0848343	0.91508	108.438	RF00089	21	40547958	40548025	-	68	snoRNA	-	-
ENSOARG00000002629	3	5	6	44	13	3	0.112721	0.168765	0.190494	1.29014	0.398743	0.112969	4.66667	20	-1.93633	0.084857	0.91508	11.3081	MCP1	JH922678.1	21	3909	+	1421	protein_coding	PF00089:Trypsin	Trypsin
ENSOARG00000002274	0	5	21	12	30	50	0	0.407155	1.60852	0.848873	2.21998	4.5424	8.66667	30.6667	-1.89903	0.0848656	0.91508	19.8205	-	JH922603.1	1705	2779	-	589	protein_coding	PF07686:Immunoglobulin V-set domain	V-set
ENSOARG00000009670	1	0	0	1	7	8	0.0241812	0	0	0.0188703	0.138179	0.193875	0.333333	5.33333	-3.88161	0.0848696	NA	2.89435	CPXM2	22	42380163	42518141	-	2208	protein_coding	PF00754:F5/8 type C domain|PF00246:Zinc carboxypeptidase|PF13620:Carboxypeptidase regulatory-like domain	F5_F8_type_C
ENSOARG00000003549	0	0	0	6	7	1	0	0	0	0.415962	0.507653	0.089034	0	4.66667	-4.50705	0.0848761	NA	2.13016	CNIH2	21	43635150	43640422	+	601	protein_coding	PF03311:Cornichon protein	-
ENSOARG00000006664	1571	1586	1313	1199	1554	1034	149.517	135.596	105.591	89.0499	120.735	98.6252	1490	1262.33	0.340195	0.084921	0.91508	1371.36	LITAF	24	10233248	10241054	-	561	protein_coding	PF10601:LITAF-like zinc ribbon domain	-
ENSOARG00000018773	1172	987	1238	1285	916	659	30.6592	23.1942	27.3654	26.2323	19.5612	17.2772	1132.33	953.333	0.363102	0.0849407	0.91508	1029.84	-	6	93192189	93258597	+	2041	protein_coding	PF00069:Protein kinase domain	Pkinase
ENSOARG00000010342	266	326	295	408	390	424	11.8057	12.9974	11.0632	14.131	14.13	18.8595	295.667	407.333	-0.392508	0.0850262	0.91508	349.062	NSL1	12	68901052	68941364	+	1203	protein_coding	PF08641:Kinetochore protein Mis14 like	-
ENSOARG00000000321	773	800	1045	907	778	558	13.8823	12.9063	15.8579	12.7113	11.4059	10.0431	872.667	747.667	0.31901	0.0850474	0.91508	798.55	IDE	22	13608417	13669967	-	2973	protein_coding	PF00675:Insulinase (Peptidase family M16)|PF16187:Middle or third domain of peptidase_M16|PF05193:Peptidase M16 inactive domain	-
ENSOARG00000013869	215	293	297	484	390	270	11.4222	13.9832	13.3326	20.0658	16.9138	14.3757	268.333	381.333	-0.408008	0.0851295	0.91508	316.665	MAP2K6	11	60025727	60059883	-	1005	protein_coding	PF00069:Protein kinase domain	Pkinase
ENSOARG00000006830	2527	3848	3540	4797	3622	4715	68.6625	93.9243	81.2764	101.715	80.3395	128.395	3305	4378	-0.347935	0.0851301	0.91508	3808.51	IL27RA	5	9741363	9764092	-	1965	protein_coding	-	-
ENSOARG00000021016	177	160	128	144	129	48	11.2908	9.16853	6.89935	7.16826	6.7175	3.06864	155	107	0.683471	0.0852741	0.91508	129.701	CLEC1A	3	204498733	204517912	+	837	protein_coding	PF00059:Lectin C-type domain	Lectin_C
ENSOARG00000014346	255	283	349	400	444	362	19.5617	19.5022	22.6225	23.9457	27.8046	27.8311	295.667	402	-0.36664	0.0853075	0.91508	343.823	HACD4	2	88809755	88831454	-	696	protein_coding	PF04387:Protein tyrosine phosphatase-like protein, PTPLA	-
ENSOARG00000009221	1208	1362	1431	1479	959	978	33.9998	34.4362	34.0327	32.4846	22.0341	27.5868	1333.67	1138.67	0.319125	0.0853302	0.91508	1224.36	MRPL3	1	256491695	256548772	+	1897	protein_coding	PF00297:Ribosomal protein L3	-
ENSOARG00000014866	1213	1047	1328	1717	2301	1061	32.3177	25.0585	29.8967	35.6985	50.0452	28.3301	1196	1693	-0.387749	0.0853506	0.91508	1411.19	FAS	22	10440163	10459422	+	2004	protein_coding	PF00531:Death domain|PF00020:TNFR/NGFR cysteine-rich region	Death
ENSOARG00000018182	131	246	249	56	45	210	2.77664	4.68395	4.45959	0.926268	0.778624	4.46089	208.667	103.667	0.958318	0.0853848	0.91508	159.257	EFR3B	3	32368166	32460690	+	2519	protein_coding	-	-
ENSOARG00000006345	354	301	230	285	218	180	31.8195	24.3044	17.4689	19.991	15.9961	16.215	295	227.667	0.492465	0.0855281	0.91508	261.254	SLC31A1	2	10416301	10420186	-	594	protein_coding	PF04145:Ctr copper transporter family	-
ENSOARG00000005945	1346	1248	1230	1841	1812	1348	228.145	190.024	176.164	243.512	250.721	228.986	1274.67	1667	-0.284417	0.085644	0.91508	1451.28	-	20	32005815	32007815	+	315	protein_coding	PF15130:Domain of unknown function (DUF4566)	-
ENSOARG00000014372	3	2	0	15	3	14	0.083295	0.0498834	0	0.325004	0.0679963	0.389564	1.66667	10.6667	-2.57578	0.0856681	0.91508	6.15502	EFHC1	20	24623985	24666356	+	1923	protein_coding	PF06565:DUF1126 PH-like domain	-
ENSOARG00000009689	2078	1580	1485	1283	1737	1214	52.7825	36.052	31.8726	25.4314	36.0172	30.9041	1714.33	1411.33	0.385266	0.0856707	0.91508	1565.82	TMCO4	2	245751187	245845796	+	2102	protein_coding	PF05277:Protein of unknown function (DUF726)	-
ENSOARG00000000019	467	211	3972	573	496	155	36.4534	14.7956	261.985	34.904	31.6059	12.1257	1550	408	1.99393	0.0857351	0.91508	937.991	COX2	MT	7019	7702	+	684	protein_coding	-	-
ENSOARG00000013446	871	1336	1213	1597	2042	1072	17.2048	23.7064	20.246	24.617	32.9271	21.2216	1140	1570.33	-0.365781	0.0857595	0.91508	1322.77	SFMBT2	13	11441514	11599244	-	2703	protein_coding	PF02820:mbt repeat|PF00536:SAM domain (Sterile alpha motif)|PF12140:SLED domain	MBT
ENSOARG00000017265	1320	1632	1016	1784	1764	1953	61.9855	68.8438	40.3141	65.3749	67.621	91.912	1322.67	1833.67	-0.394292	0.0858397	0.91508	1574.38	TMEM173	5	48123808	48127851	-	1137	protein_coding	PF15009:Transmembrane protein 173	-
ENSOARG00000010720	222	215	272	245	186	115	24.2393	21.088	25.0948	20.8754	16.5786	12.584	236.333	182	0.489387	0.0858795	0.91508	206.001	-	1	79032841	79033329	+	489	protein_coding	PF03357:Snf7	ESCRT-III
ENSOARG00000021104	218	233	295	388	357	284	18.5047	17.7669	21.159	25.7015	24.7378	24.1601	248.667	343	-0.377491	0.08592	0.91508	290.42	-	7	66670021	66686844	+	629	protein_coding	PF00583:Acetyltransferase (GNAT) family	Acetyltransf_1
ENSOARG00000015913	0	9	0	35	14	7	0	1.29629	0	4.37926	1.83243	1.12482	3	18.6667	-2.49981	0.0859292	0.91508	10.0588	-	4	105327427	105327846	+	333	protein_coding	PF07686:Immunoglobulin V-set domain	V-set
ENSOARG00000014670	0	6	13	1	0	0	0	0.595812	1.21428	0.086264	0	0	6.33333	0.333333	4.15004	0.0860328	NA	3.20538	-	9	79301016	79301498	+	483	protein_coding	PF01849:NAC domain	-
ENSOARG00000008199	7699	9540	9607	9815	8547	5243	113.054	125.843	119.203	112.472	102.455	77.1589	8948.67	7868.33	0.293146	0.086097	0.91576	8267.66	PTPRJ	15	76051389	76092367	+	3636	protein_coding	PF00041:Fibronectin type III domain|PF00102:Protein-tyrosine phosphatase	Y_phosphatase
ENSOARG00000017006	7414	10428	6725	11080	12167	9560	663.063	837.784	508.208	773.29	888.285	856.868	8189	10935.7	-0.326524	0.0861518	0.91576	9451.36	-	20	28146690	28151449	+	597	protein_coding	PF00240:Ubiquitin family	ubiquitin
ENSOARG00000015942	0	1	0	12	9	0	0	0.0257588	0	0.268521	0.210672	0	0.333333	7	-4.09876	0.0861606	NA	3.29161	USP2	15	29405834	29421267	-	1862	protein_coding	PF00443:Ubiquitin carboxyl-terminal hydrolase	UCH
ENSOARG00000026989	46	22	30	12	24	10	0.620995	0.266797	0.342214	0.126419	0.264489	0.135296	32.6667	15.3333	1.218	0.0862825	0.91576	24.2832	-	16	70469926	70666241	-	3955	lincRNA	-	-
ENSOARG00000007771	2057	4295	3855	4652	4319	4945	27.8892	52.311	44.1644	49.2199	47.8025	67.1925	3402.33	4638.67	-0.400506	0.0863428	0.91576	3973.77	SEMA4D	2	24034895	24080618	-	3938	protein_coding	PF01403:Sema domain|PF01437:Plexin repeat	Sema
ENSOARG00000011046	2806	1757	1999	1943	1898	1590	135.337	76.1254	81.4683	73.1311	74.7295	76.8564	2187.33	1810.33	0.38144	0.0863589	0.91576	2003.46	NCF1	24	32675507	32685763	-	1107	protein_coding	PF00787:PX domain|PF14604:Variant SH3 domain|PF16621:SH3 terminal domain of 2nd SH3 on Neutrophil cytosol factor 1|PF08944:NADPH oxidase subunit p47Phox, C terminal domain	PX
ENSOARG00000001402	5	6	0	13	25	12	1.32816	1.43173	0	2.69479	5.4211	3.19459	3.66667	16.6667	-2.04917	0.0865236	0.916589	9.8905	-	4	112116590	112116790	+	201	protein_coding	-	-
ENSOARG00000005960	182	140	205	240	296	237	2.5077	1.73285	2.38674	2.58057	3.32938	3.27271	175.667	257.667	-0.470606	0.0865417	0.916589	214.221	-	4	114515255	114585329	+	3875	protein_coding	PF00022:Actin	Actin
ENSOARG00000018369	1105	1524	1617	1955	1936	1529	13.5628	16.8036	16.7704	18.7255	19.3981	18.8083	1415.33	1806.67	-0.272336	0.0867112	0.916844	1583.12	AURKA	13	58840124	58858898	+	4350	protein_coding	PF00069:Protein kinase domain	Pkinase
ENSOARG00000020203	911	940	1002	1244	1292	1103	37.358	34.6276	34.72	39.8095	43.2509	45.3309	951	1213	-0.267124	0.0868423	0.916844	1070.33	GMPPA	2	220405233	220411619	+	1302	protein_coding	PF00132:Bacterial transferase hexapeptide (six repeats)|PF00483:Nucleotidyl transferase	Hexapep
ENSOARG00000001085	30	56	109	31	42	31	4.53757	7.60884	13.9308	3.65901	5.18582	4.69913	65	34.6667	0.949544	0.0868689	0.916844	48.92	-	AMGL01130016.1	180	1265	-	353	protein_coding	-	-
ENSOARG00000017093	31	51	68	78	91	91	0.936173	1.38355	1.7352	1.83818	2.24338	2.75416	50	86.6667	-0.747536	0.0868689	0.916844	67.3301	SPRY1	17	34048620	34052039	-	1768	protein_coding	PF05210:Sprouty protein (Spry)	-
ENSOARG00000013765	929	2820	2799	2863	2755	4122	43.6247	118.958	111.062	104.915	105.61	193.989	2182.67	3246.67	-0.562717	0.0868798	0.916844	2696	TCF7	5	43142639	43172259	+	1137	protein_coding	PF00505:HMG (high mobility group) box|PF08347:N-terminal CTNNB1 binding	HMG_box
ENSOARG00000019482	66	186	58	110	96	417	2.07653	5.25698	1.54195	2.70077	2.46566	13.1488	103.333	207.667	-1.04154	0.0870734	0.918241	161.225	-	7	22269599	22271510	-	1697	protein_coding	PF07686:Immunoglobulin V-set domain	V-set
ENSOARG00000016326	219	218	261	358	346	263	9.39186	8.39832	9.4579	11.9809	12.113	11.3036	232.667	322.333	-0.378462	0.0871171	0.918241	272.744	OSGEPL1	2	118454316	118463272	+	1245	protein_coding	PF00814:Glycoprotease family	Peptidase_M22
ENSOARG00000012129	1300	741	1189	820	1045	717	39.6174	20.2857	30.6176	19.501	25.9971	21.8985	1076.67	860.667	0.424569	0.0872331	0.918912	967.381	SLC7A5	14	12801358	12826768	-	1752	protein_coding	PF13520:Amino acid permease	-
ENSOARG00000025730	11	23	16	6	9	1	0.077728	0.145996	0.0955326	0.0330854	0.0519151	0.00708171	16.6667	5.33333	1.7752	0.0873295	0.919374	10.8705	-	2	421275	618848	-	7556	lincRNA	-	-
ENSOARG00000004112	287	467	493	696	543	481	11.226	16.4093	16.2944	21.2448	17.3385	18.8557	415.667	573.333	-0.386213	0.087454	0.920132	483.901	TRAF4	11	19788399	19794104	+	1365	protein_coding	PF02176:TRAF-type zinc finger|PF00097:Zinc finger, C3HC4 type (RING finger)	zf-C3HC4
ENSOARG00000007691	78	87	111	124	193	120	1.7096	1.71296	2.05574	2.12091	3.45321	2.63593	92	145.667	-0.583063	0.087513	0.920199	116.611	-	9	82535287	82581802	+	2436	protein_coding	PF00176:SNF2 family N-terminal domain|PF00271:Helicase conserved C-terminal domain	SNF2_N
ENSOARG00000023586	0	0	0	7	3	3	0	0	0	1.91881	0.860243	1.05611	0	4.33333	-4.44128	0.0876422	NA	2.03916	RF00004	11	42668332	42668483	+	152	snRNA	-	-
ENSOARG00000002374	212	148	177	85	153	131	9.45624	5.93025	6.67118	2.9587	5.57109	5.85609	179	123	0.617784	0.0878284	0.922962	152.507	-	JH924273.1	21	1254	-	1197	protein_coding	-	-
ENSOARG00000026993	8	6	0	0	0	0	0.211454	0.142464	0	0	0	0	4.66667	0	4.81208	0.087969	NA	2.49765	-	16	70982405	71011669	-	2020	lincRNA	-	-
ENSOARG00000006828	4615	2815	2400	2204	3566	1884	84.0684	46.0647	36.9419	31.3309	53.0284	34.395	3276.67	2551.33	0.491115	0.0881834	0.926137	2928.97	FCRL5	1	106420982	106462106	-	2931	protein_coding	PF13927:Immunoglobulin domain|PF13895:Immunoglobulin domain	-
ENSOARG00000002001	11	18	20	28	41	39	0.577495	0.848901	0.887222	1.14713	1.75714	2.05198	16.3333	36	-1.09242	0.0882822	0.926619	25.852	-	14	59643790	59655057	+	1017	protein_coding	PF13895:Immunoglobulin domain	-
ENSOARG00000009427	489	537	506	643	889	561	81.3356	80.237	71.1163	83.4609	120.709	93.5165	510.667	697.667	-0.356386	0.0884048	0.92735	595.355	GLRX	2	116429163	116429483	-	321	protein_coding	PF00462:Glutaredoxin	-
ENSOARG00000007944	32	0	0	1	2	0	2.02675	0	0	0.0494253	0.103406	0	10.6667	1	3.69475	0.0886214	0.927914	6.41638	SLAMF8	1	109164560	109172798	+	843	protein_coding	-	-
ENSOARG00000009250	5145	3649	3932	2422	4806	2813	78.8694	50.2488	50.9312	28.9733	60.1414	43.2162	4242	3347	0.443434	0.0887816	0.927914	3804.1	-	24	27446741	27473467	+	3483	protein_coding	PF00357:Integrin alpha cytoplasmic region|PF00092:von Willebrand factor type A domain|PF08441:Integrin alpha	VWA
ENSOARG00000005162	60	95	91	65	22	54	1.46883	2.08917	1.88239	1.24175	0.439653	1.32486	82	47	0.859804	0.0889746	0.927914	64.4138	TRIP10	5	15405869	15415300	-	2181	protein_coding	PF00018:SH3 domain|PF00611:Fes/CIP4, and EFC/F-BAR homology domain	SH3_1
ENSOARG00000000357	6421	4908	5837	5441	5446	4183	45.6316	31.3326	35.051	30.1746	31.5942	29.7924	5722	5023.33	0.290112	0.0890053	0.927914	5347.9	NCOR2	17	50846719	51047632	+	7513	protein_coding	PF00249:Myb-like DNA-binding domain|PF15784:G-protein pathway suppressor 2-interacting domain	Myb_DNA-binding
ENSOARG00000021072	147	120	105	99	93	74	12.5779	9.22363	7.59151	6.6104	6.49593	6.34567	124	88.6667	0.592473	0.0890127	0.927914	106.565	THEM4	1	100734906	100770288	-	624	protein_coding	PF03061:Thioesterase superfamily	4HBT
ENSOARG00000013903	16012	11316	9395	13350	9862	7094	69.7433	44.2771	34.5781	45.3773	35.0662	30.9672	12241	10102	0.414291	0.0890127	0.927914	11143.7	STAT1	2	192154022	192352057	-	12258	protein_coding	PF02864:STAT protein, DNA binding domain|PF01017:STAT protein, all-alpha domain|PF02865:STAT protein, protein interaction domain|PF00017:SH2 domain	STAT_bind
ENSOARG00000008034	125	350	305	451	202	651	8.89868	22.3827	18.3469	25.0549	11.7391	46.4462	260	434.667	-0.743172	0.0890705	0.927914	348.358	MAF	14	5921193	5923225	-	750	protein_coding	PF08383:Maf N-terminal region|PF03131:bZIP Maf transcription factor	bZIP_Maf
ENSOARG00000020448	27	46	5	78	43	71	0.132304	0.202487	0.0207027	0.298266	0.172006	0.348676	26	64	-1.20625	0.0891254	0.927914	44.7366	SPTBN5	7	34264857	34313571	-	10896	protein_coding	PF00435:Spectrin repeat|PF00307:Calponin homology (CH) domain	CH
ENSOARG00000000420	756	1007	1029	1421	1324	909	55.2181	66.072	63.507	80.9941	78.943	66.5391	930.667	1218	-0.29413	0.0891604	0.927914	1051.42	NDFIP2	10	55066451	55134798	+	731	protein_coding	-	-
ENSOARG00000010005	46	103	101	182	101	136	0.72966	1.46767	1.35373	2.25286	1.30783	2.162	83.3333	139.667	-0.685227	0.089207	0.927914	109.16	IGF1R	18	7159507	7219744	+	3366	protein_coding	PF07714:Protein tyrosine kinase|PF01030:Receptor L domain	Pkinase_Tyr
ENSOARG00000002308	0	6	0	20	16	5	0	0.267949	0	0.775894	0.64932	0.249113	2	13.6667	-2.64176	0.0893297	0.927914	7.29909	-	1	20647893	20653848	+	1074	protein_coding	-	-
ENSOARG00000003598	10	27	40	135	23	36	0.143181	0.347278	0.48394	1.50841	0.268831	0.516583	25.6667	64.6667	-1.23335	0.0893544	0.927914	42.6362	NID1	25	8731695	8829119	-	3729	protein_coding	PF00058:Low-density lipoprotein receptor repeat class B|PF12947:EGF domain|PF14670:Coagulation Factor Xa inhibitory site|PF07474:G2F domain|PF00086:Thyroglobulin type-1 repeat|PF06119:Nidogen-like|PF12662:Complement Clr-like EGF-like|PF07645:Calcium-binding EGF domain	EGF_CA
ENSOARG00000018598	2215	2546	2333	2389	2108	1869	64.4839	66.5832	57.3904	54.2742	50.0973	54.5306	2364.67	2122	0.245639	0.0894015	0.927914	2227.58	-	24	2001470	2008415	+	1834	protein_coding	PF01979:Amidohydrolase family	Amidohydro_1
ENSOARG00000017361	1199	918	1110	936	1113	677	10.1293	6.96676	7.92372	6.17072	7.67576	5.73194	1075.67	908.667	0.352239	0.0894587	0.927914	985.591	ARHGEF12	15	30444461	30605043	+	6320	protein_coding	PF00595:PDZ domain (Also known as DHR or GLGF)|PF00621:RhoGEF domain|PF09128:Regulator of G protein signalling-like domain	RhoGEF
ENSOARG00000008140	248	142	199	478	338	170	0.780779	0.4016	0.529391	1.17437	0.86868	0.536388	196.333	328.667	-0.595714	0.0895024	0.927914	254.529	AHNAK2	18	68080130	68102383	-	16959	protein_coding	-	-
ENSOARG00000006070	331	663	728	883	727	809	17.8874	32.1856	33.2428	37.2375	32.0716	43.8149	574	806.333	-0.439721	0.0895896	0.927914	678.699	TP53INP1	9	82018386	82026720	+	988	protein_coding	PF14839:DOR family	-
ENSOARG00000013231	1035	1374	1765	1329	1341	853	74.2753	88.5766	107.027	74.4267	78.5596	61.3488	1391.33	1174.33	0.331954	0.0896074	0.927914	1259.94	-	3	100189574	100202670	+	744	protein_coding	PF13639:Ring finger domain	-
ENSOARG00000013347	291	124	77	137	125	27	9.50281	3.63755	2.12469	3.49124	3.33223	0.883642	164	96.3333	0.978729	0.0896238	0.927914	131.307	CHGA	18	56508336	56521129	+	1635	protein_coding	PF01271:Granin (chromogranin or secretogranin)	Granin
ENSOARG00000005567	6	15	2	16	26	30	0.308625	0.693105	0.0869273	0.642243	1.09174	1.54652	7.66667	24	-1.59054	0.0897783	0.928964	15.8538	GFI1B	3	3849533	3853609	-	1038	protein_coding	-	-
ENSOARG00000019435	190	386	499	534	420	647	4.48474	8.18465	9.95248	9.83616	8.09282	15.3053	358.333	533.667	-0.552188	0.0899101	0.929779	441.778	SIDT1	1	176621115	176691988	+	2262	protein_coding	PF13965:dsRNA-gated channel SID-1	-
ENSOARG00000001886	3	17	26	23	74	27	0.180582	0.919244	1.32243	1.08039	3.63623	1.62881	15.3333	41.3333	-1.38204	0.0899857	0.929844	27.2058	-	JH924448.1	1181	3606	-	887	protein_coding	-	-
ENSOARG00000003992	1	3	12	0	1	0	0.0249963	0.0673636	0.253457	0	0.0204053	0	5.33333	0.333333	3.90774	0.0900398	NA	2.73741	SLC44A4	20	26608786	26621915	+	2136	protein_coding	PF04515:Plasma-membrane choline transporter	-
ENSOARG00000016970	3173	2714	2136	2762	2486	1483	32.2201	24.7568	18.3275	21.8867	20.6074	15.0921	2674.33	2243.67	0.385391	0.0901198	0.929975	2443.24	TPP1	15	45851896	45860573	+	5258	protein_coding	PF09286:Pro-kumamolisin, activation domain	-
ENSOARG00000007834	5	29	11	20	81	25	0.224714	1.17081	0.417734	0.70144	2.97175	1.12604	15	42	-1.40254	0.0901415	0.929975	27.4792	-	X	78098141	78122431	+	1188	protein_coding	PF13927:Immunoglobulin domain|PF00047:Immunoglobulin domain	ig
ENSOARG00000015333	295	1107	729	530	440	493	6.50048	21.9129	13.5737	9.1138	7.91485	10.8874	710.333	487.667	0.589946	0.0902432	0.930095	592.314	RRM2	3	19185138	19191043	+	2423	protein_coding	PF00268:Ribonucleotide reductase, small chain	-
ENSOARG00000005510	14	8	2	42	33	9	0.643832	0.330494	0.0777179	1.50728	1.23887	0.414802	8	28	-1.60538	0.0902593	0.930095	17.1106	-	5	15588136	15597666	+	1161	protein_coding	PF01569:PAP2 superfamily	-
ENSOARG00000008941	1117	1563	1449	1772	1748	1813	18.5157	23.2741	20.2956	22.9219	23.6534	30.1188	1376.33	1777.67	-0.304283	0.09039	0.930895	1563.01	TRIM65	11	54739292	54744668	+	3221	protein_coding	PF00097:Zinc finger, C3HC4 type (RING finger)	zf-C3HC4
ENSOARG00000011221	20	38	25	40	22	126	1.12286	1.9165	1.186	1.75249	1.00829	7.08958	27.6667	62.6667	-1.21381	0.0904945	0.931064	46.7715	NXN	11	21638503	21662656	+	951	protein_coding	PF13848:Thioredoxin-like domain|PF13905:Thioredoxin-like	-
ENSOARG00000003401	9	42	12	64	61	29	0.731398	3.06612	0.824023	4.05874	4.04676	2.36191	21	51.3333	-1.18047	0.0905127	0.931064	34.6771	KCNK1	25	6586908	6591739	+	657	protein_coding	PF07885:Ion channel	Ion_trans_2
ENSOARG00000017022	13	33	99	20	21	21	0.120003	0.273647	0.772201	0.144072	0.158247	0.194277	48.3333	20.6667	1.23824	0.0906591	0.931829	33.6375	-	7	8293106	8406157	+	5784	protein_coding	PF00233:3'5'-cyclic nucleotide phosphodiesterase|PF13426:PAS domain	-
ENSOARG00000006427	0	0	1	2	3	10	0	0	0.00602018	0.0111197	0.0174482	0.071403	0.333333	5	-3.82911	0.0906735	NA	2.77486	PLXNA4	4	95788312	96204055	-	7494	protein_coding	PF08337:Plexin cytoplasmic RasGAP domain|PF01403:Sema domain|PF01833:IPT/TIG domain|PF01437:Plexin repeat	Sema
ENSOARG00000020249	549	1313	1002	1583	2211	719	9.16581	19.6921	14.1356	20.6243	30.1338	12.0304	954.667	1504.33	-0.54731	0.0908127	0.931829	1183.39	CD2	1	93287546	93303601	+	3198	protein_coding	-	-
ENSOARG00000001634	298	227	366	265	282	134	8.18038	5.59773	8.48956	5.67679	6.31936	3.68651	297	227	0.502618	0.0908525	0.931829	258.142	PHACTR2	8	68001748	68215271	+	1945	protein_coding	PF02755:RPEL repeat	-
ENSOARG00000014286	588	760	718	994	895	777	72.1713	83.7972	74.4661	95.2081	89.6762	95.5789	688.667	888.667	-0.283532	0.0908739	0.931829	777.15	BLOC1S2	22	20333031	20341253	-	435	protein_coding	PF10046:Biogenesis of lysosome-related organelles complex-1 subunit 2	-
ENSOARG00000008576	1722	1603	1684	2471	2528	1597	28.0138	23.4261	23.1487	31.3697	33.5724	26.0373	1669.67	2198.67	-0.287922	0.0909452	0.931829	1900.27	VCL	25	29800361	29867502	+	3282	protein_coding	PF01044:Vinculin family	-
ENSOARG00000024057	21	35	43	91	70	35	15.3594	22.9959	26.5747	51.9392	41.7944	25.6552	33	65.3333	-0.879614	0.0909902	0.931829	47.0686	RF00342	21	579258	579330	+	73	snoRNA	-	-
ENSOARG00000007483	315	375	409	694	373	496	4.48493	4.79629	4.92057	7.7109	4.33532	7.07751	366.333	521	-0.428964	0.0910579	0.931829	436.993	INF2	18	67818337	67832188	+	3750	protein_coding	PF06367:Diaphanous FH3 Domain|PF02181:Formin Homology 2 Domain|PF06371:Diaphanous GTPase-binding Domain	FH2
ENSOARG00000006877	1102	1798	1671	2240	2060	1663	179.933	263.723	230.543	285.415	274.576	272.129	1523.67	1987.67	-0.303632	0.0910658	0.931829	1722.56	GABARAPL2	14	2251815	2262220	+	327	protein_coding	PF02991:Autophagy protein Atg8 ubiquitin like	-
ENSOARG00000004332	0	0	0	2	3	7	0	0	0	0.0685852	0.107619	0.308285	0	4	-4.44603	0.0911659	NA	2.05671	DOC2A	24	26264260	26268138	+	1215	protein_coding	PF00168:C2 domain	C2
ENSOARG00000013621	569	831	673	971	861	926	94.642	124.166	94.5875	126.035	116.907	154.361	691	919.333	-0.341621	0.0912083	0.93226	797.689	GYPC	2	191572516	191575538	+	321	protein_coding	-	-
ENSOARG00000014993	123	17	5	31	8	14	13.9432	1.73114	0.478931	2.74232	0.740308	1.59051	48.3333	17.6667	1.66408	0.0912236	0.93226	34.9275	LMO1	15	43837328	43873581	+	471	protein_coding	PF00412:LIM domain	LIM
ENSOARG00000008775	351	438	563	412	269	364	30.1781	33.8289	40.9016	27.6428	18.8801	31.3646	450.667	348.333	0.431525	0.09129	0.93226	396.935	-	16	31726375	31731753	+	621	protein_coding	PF04592:Selenoprotein P, N terminal region	-
ENSOARG00000001952	0	0	0	12	5	0	0	0	0	1.34405	0.585828	0	0	5.66667	-4.74628	0.091325	NA	2.51353	-	13	22847853	22848228	+	372	pseudogene	PF01248:Ribosomal protein L7Ae/L30e/S12e/Gadd45 family	-
ENSOARG00000012622	0	0	0	12	5	0	0	0	0	0.925901	0.403571	0	0	5.66667	-4.74628	0.091325	NA	2.51353	-	5	17987229	17990517	+	540	protein_coding	PF15807:Membrane-associated protein 117 kDa, PDZK1-interacting protein 1	-
ENSOARG00000008480	42	69	51	71	47	200	1.10575	1.63187	1.13456	1.4587	1.01012	5.27706	54	106	-0.994592	0.0913652	0.93226	82.3341	ALOX15	11	26321704	26328096	+	2028	protein_coding	PF00305:Lipoxygenase|PF01477:PLAT/LH2 domain	Lipoxygenase
ENSOARG00000026058	117	32	60	167	171	82	3.5333	0.868107	1.53106	3.9356	4.21558	2.48177	69.6667	140	-0.84834	0.0915164	0.93226	102.422	-	3	216911013	216913954	-	1768	lincRNA	-	-
ENSOARG00000023412	0	0	0	3	2	7	0	0	0	1.95307	1.36205	5.85259	0	4	-4.44153	0.0917647	NA	2.05	MIR142	11	8851623	8851686	-	64	miRNA	-	-
ENSOARG00000000115	22	45	71	107	106	50	0.729128	1.33975	1.98832	2.76736	2.86783	1.66075	46	87.6667	-0.844798	0.0918627	0.93226	63.983	-	14	57187783	57193973	+	1611	protein_coding	PF01352:KRAB box|PF00096:Zinc finger, C2H2 type	KRAB
ENSOARG00000002960	201	232	188	194	184	97	2.04376	2.1191	1.61525	1.53935	1.52728	0.988462	207	158.333	0.506381	0.091927	0.93226	180.564	STON2	7	89554051	89682887	-	5251	protein_coding	PF00928:Adaptor complexes medium subunit family|PF12016:Stonin 2	Adap_comp_sub
ENSOARG00000025786	46	91	40	33	33	34	0.517605	0.919836	0.380318	0.289771	0.303124	0.383418	59	33.3333	0.899113	0.0919285	0.93226	46.3538	-	2	89795772	89821319	+	4745	lincRNA	-	-
ENSOARG00000026670	70	46	37	163	150	28	0.721793	0.42609	0.322376	1.3116	1.26262	0.289352	51	113.667	-0.969587	0.0919535	0.93226	78.5039	-	19	59014409	59020528	+	5178	lincRNA	-	-
ENSOARG00000005225	0	0	0	7	4	2	0	0	0	1.59376	0.952691	0.584802	0	4.33333	-4.41852	0.0921706	NA	2.00501	-	17	68313915	68314802	-	183	protein_coding	-	-
ENSOARG00000002729	30	49	64	36	29	13	0.773798	1.13535	1.39487	0.724618	0.61062	0.33605	47.6667	26	0.977455	0.0922557	0.93226	36.0232	-	6	71344193	71346268	+	2070	pseudogene	-	-
ENSOARG00000019502	16	23	32	38	38	69	0.10531	0.135989	0.177969	0.195179	0.204173	0.455147	23.6667	48.3333	-1.01784	0.0923177	0.93226	36.1211	CELSR1	3	220841891	220986168	-	8112	protein_coding	PF01825:GPCR proteolysis site, GPS, motif|PF00002:7 transmembrane receptor (Secretin family)|PF16489:GPCR-Autoproteolysis INducing (GAIN) domain|PF00028:Cadherin domain|PF02210:Laminin G domain|PF00053:Laminin EGF domain	7tm_2
ENSOARG00000002223	2238	2129	1931	2504	1745	943	13.2313	11.3069	9.6465	11.5525	8.42176	5.58735	2099.33	1730.67	0.417518	0.092342	0.93226	1886.9	MYOF	22	14332796	14482165	-	9031	protein_coding	PF16165:Ferlin C-terminus|PF00168:C2 domain|PF08150:FerB (NUC096) domain|PF08165:FerA (NUC095) domain|PF08151:FerI (NUC094) domain	C2
ENSOARG00000016184	276	725	686	913	545	1109	13.2045	31.1587	27.7321	34.0866	21.2851	53.1738	562.333	855.667	-0.58838	0.0923767	0.93226	704.838	SAMSN1	1	141025785	141084949	+	1116	protein_coding	PF07647:SAM domain (Sterile alpha motif)|PF12485:Lymphocyte signaling adaptor protein	SAM_2
ENSOARG00000021019	0	12	6	0	1	0	0	0.675534	0.317713	0	0.0511568	0	6	0.333333	4.10103	0.0924689	NA	3.11285	CLEC9A	3	204529427	204540034	-	852	protein_coding	PF00059:Lectin C-type domain	Lectin_C
ENSOARG00000006244	555	607	592	630	483	385	6.62625	6.51017	5.97232	5.8697	4.70748	4.60669	584.667	499.333	0.329932	0.0924743	0.93226	536.267	TDRD3	10	1835291	2065511	-	4472	protein_coding	PF08585:RecQ mediated genome instability protein|PF00567:Tudor domain|PF00627:UBA/TS-N domain	UBA
ENSOARG00000007749	3289	3176	3313	2563	2697	2992	226.006	196.049	192.364	137.437	151.288	206.049	3259.33	2750.67	0.312649	0.0925246	0.93226	3013.2	-	5	3560150	3576196	-	777	protein_coding	PF06212:GRIM-19 protein	-
ENSOARG00000000341	660	826	862	823	732	435	8.37025	9.4103	9.23738	8.14507	7.57831	5.52888	782.667	663.333	0.344518	0.0926444	0.93226	710.701	RNPEP	12	78996222	79007748	+	4210	protein_coding	PF09127:Leukotriene A4 hydrolase, C-terminal|PF01433:Peptidase family M1 domain	-
ENSOARG00000009454	1142	1007	966	853	1019	780	72.073	57.0906	51.5146	42.0103	52.4985	49.3349	1038.33	884	0.328054	0.0926541	0.93226	959.932	LYL1	5	10557786	10559460	+	846	protein_coding	PF00010:Helix-loop-helix DNA-binding domain	HLH
ENSOARG00000006106	10375	6862	7188	7019	8198	5333	164.131	97.5175	96.0855	86.6519	105.871	84.5528	8141.67	6850	0.367569	0.0926622	0.93226	7490.97	CIITA	24	9540624	9594737	+	3375	protein_coding	PF05729:NACHT domain	NACHT
ENSOARG00000002871	1245	1162	1336	1333	1167	770	39.8998	33.4531	36.1789	33.3374	30.5309	24.7312	1247.67	1090	0.30431	0.0926627	0.93226	1154.3	ATL3	21	41309227	41347534	-	1666	protein_coding	PF02841:Guanylate-binding protein, C-terminal domain|PF02263:Guanylate-binding protein, N-terminal domain	-
ENSOARG00000012715	58	0	20	0	3	0	2.16404	0	0.630542	0	0.0913745	0	26	1	4.91863	0.0926739	0.93226	14.4287	PTGIS	13	77175674	77209875	-	1431	protein_coding	PF00067:Cytochrome P450	p450
ENSOARG00000005288	98	88	142	208	161	135	1.01759	0.820835	1.24589	1.68542	1.3647	1.40486	109.333	168	-0.530743	0.0927207	0.93226	135.575	KIAA1328	23	20111910	20525120	-	5142	protein_coding	PF15369:Uncharacterised protein KIAA1328	-
ENSOARG00000026322	0	0	3	10	24	0	0	0	0.22671	0.697915	1.75219	0	1	11.3333	-3.40493	0.092879	0.93226	5.59481	-	10	69698774	69701603	+	597	lincRNA	-	-
ENSOARG00000001110	684	998	1157	1548	1443	873	32.376	42.4353	46.2751	57.1793	55.7571	41.4129	946.333	1288	-0.350717	0.0930984	0.93226	1086.66	SBK1	24	25823256	25828370	+	1128	protein_coding	PF00069:Protein kinase domain	Pkinase
ENSOARG00000014485	835	835	837	796	816	587	20.526	18.4388	17.3856	15.2697	16.3747	14.4613	835.667	733	0.288092	0.0932257	0.93226	778.148	MTRR	16	65203295	65234542	-	2172	protein_coding	PF00258:Flavodoxin|PF00667:FAD binding domain|PF00175:Oxidoreductase NAD-binding domain	NAD_binding_1
ENSOARG00000019704	286	350	454	368	313	187	15.6136	17.1646	20.9431	15.6778	13.9492	10.2314	363.333	289.333	0.428698	0.0932304	0.93226	320.086	MRPS35	3	186846400	186892622	-	978	protein_coding	PF10213:Mitochondrial ribosomal subunit protein	-
ENSOARG00000009091	193	167	88	183	396	200	3.84503	2.98873	1.4814	2.84507	6.44026	3.99324	149.333	259.667	-0.678295	0.0932613	0.93226	202.356	SMTN	17	69405619	69424069	+	2680	protein_coding	PF12510:Smoothelin cytoskeleton protein|PF00307:Calponin homology (CH) domain	CH
ENSOARG00000003411	1687	1788	2098	2283	2636	2108	41.508	39.5197	43.6184	43.8352	52.9455	51.9806	1857.67	2342.33	-0.255233	0.0933092	0.93226	2074.64	AKAP8L	5	7513910	7544611	+	2170	protein_coding	PF04988:A-kinase anchoring protein 95 (AKAP95)	-
ENSOARG00000021850	11	10	0	16	41	22	4.44934	3.63355	0	5.05037	13.538	8.91824	7	26.3333	-1.77796	0.0933327	0.93226	16.4264	RF00410	3	137331102	137331233	+	132	snoRNA	-	-
ENSOARG00000004039	5	10	6	17	27	17	0.379205	0.681291	0.384505	1.00613	1.67161	1.29213	7	20.3333	-1.45686	0.0934118	0.93226	13.3314	RGS17	8	76516767	76613997	-	704	protein_coding	PF00615:Regulator of G protein signaling domain	RGS
ENSOARG00000001497	1843	1708	1830	3065	2548	1630	37.4293	31.1604	31.4039	48.5754	42.2427	33.1763	1793.67	2414.33	-0.311789	0.0935319	0.93226	2059.37	TES	4	52096960	52160943	-	2629	protein_coding	PF00412:LIM domain|PF06297:PET Domain	LIM
ENSOARG00000022331	51	35	35	113	95	36	38.8999	23.9814	22.5576	67.2601	59.1519	27.5191	40.3333	81.3333	-0.857692	0.0935619	0.93226	58.6085	RF00278	8	50919518	50919587	+	70	snoRNA	-	-
ENSOARG00000001146	904	1276	1280	1684	1564	1200	196.205	248.783	234.746	285.223	277.105	261.022	1153.33	1482.67	-0.276747	0.0935882	0.93226	1293.09	ABRACL	8	63801650	63810872	+	246	protein_coding	-	-
ENSOARG00000010688	29	9	23	24	46	73	3.91003	1.09007	2.62033	2.52518	5.06298	9.86411	20.3333	47.6667	-1.19398	0.0935892	0.93226	34.7004	TFF2	1	260685063	260688375	-	396	protein_coding	PF00088:Trefoil (P-type) domain	-
ENSOARG00000009739	4	0	0	14	8	9	0.192231	0	0	0.525038	0.313848	0.43347	1.33333	10.3333	-2.77054	0.0936553	0.93226	5.68938	STMN4	2	38338214	38361732	+	1111	protein_coding	PF00836:Stathmin family	-
ENSOARG00000017627	5569	6403	9287	6941	7182	3798	49.0337	50.6442	69.0939	47.6914	51.6214	33.514	7086.33	5973.67	0.344877	0.093683	0.93226	6396.53	GPCPD1	13	46968206	47032674	-	6064	protein_coding	PF03009:Glycerophosphoryl diester phosphodiesterase family|PF00686:Starch binding domain	-
ENSOARG00000018862	230	184	184	174	181	102	12.9538	9.30925	8.75655	7.64747	8.32173	5.75734	199.333	152.333	0.509223	0.0938815	0.93226	174.846	FAM102B	1	85124291	85164079	+	948	protein_coding	PF10358:N-terminal C2 in EEIG1 and EHBP1 proteins	-
ENSOARG00000000578	550	1551	979	1343	1534	1604	11.8124	29.9238	17.7666	22.5088	26.8947	34.525	1026.67	1493.67	-0.49542	0.0939127	0.93226	1246.8	CDCA7	2	135465988	135478982	-	2486	protein_coding	PF10497:Zinc-finger domain of monoamine-oxidase A repressor R1	-
ENSOARG00000014696	2	7	8	7	31	19	0.0808971	0.254349	0.273426	0.220954	1.0236	0.770211	5.66667	19	-1.71525	0.0939365	0.93226	12.1099	IGLON5	14	56339866	56347662	+	1320	protein_coding	PF13927:Immunoglobulin domain|PF00047:Immunoglobulin domain	ig
ENSOARG00000016227	606	759	679	590	651	514	5.09938	5.73741	4.82794	3.87434	4.47191	4.33473	681.333	585	0.304709	0.0939393	0.93226	628.897	DCAF13	9	73646867	73678995	-	6345	protein_coding	PF04158:Sof1-like domain	-
ENSOARG00000017836	1044	1410	1254	1634	1555	1577	40.9261	49.6532	41.5378	49.9864	49.7619	61.9562	1236	1588.67	-0.291137	0.0940784	0.93226	1399.29	SDE2	12	27173234	27188574	-	1362	protein_coding	PF13297:Telomere stability C-terminal|PF13019:Telomere stability and silencing	-
ENSOARG00000010812	4012	2355	2946	2172	3535	1731	61.3428	32.3461	38.0612	25.9157	44.1223	26.5249	3104.33	2479.33	0.446964	0.0940801	0.93226	2787.67	-	2	247799245	247905031	-	3492	protein_coding	-	-
ENSOARG00000011128	290	218	273	252	187	175	3.97936	2.6872	3.16537	2.69846	2.09471	2.40662	260.333	204.667	0.447796	0.0941301	0.93226	231.716	-	1	261295143	261315296	-	3891	protein_coding	PF00571:CBS domain|PF00291:Pyridoxal-phosphate dependent enzyme	PALP
ENSOARG00000020378	1382	872	1216	870	1175	786	10.4441	5.91984	7.76506	5.13079	7.24885	5.95307	1156.67	943.667	0.395326	0.094131	0.93226	1048.92	HIVEP3	1	15830095	15885701	-	7065	protein_coding	-	-
ENSOARG00000003156	22	41	39	62	71	54	4.7749	7.99382	7.15242	10.5011	12.5796	11.746	34	62.3333	-0.802822	0.0941723	0.93226	47.0997	C5orf58	16	2174699	2181549	+	246	protein_coding	-	-
ENSOARG00000003086	114	96	133	59	110	63	3.87935	2.93463	3.8243	1.56677	3.05572	2.14856	114.333	77.3333	0.651239	0.0942436	0.93226	95.5147	KCNK10	7	96799004	96885294	-	1569	protein_coding	PF07885:Ion channel	Ion_trans_2
ENSOARG00000000945	109	86	98	170	143	139	4.94875	3.50749	3.75961	6.02308	5.29995	6.32467	97.6667	150.667	-0.532389	0.0942942	0.93226	122.798	NSMF	3	525717	534234	+	1176	protein_coding	-	-
ENSOARG00000004062	6	6	17	37	37	10	0.456342	0.409939	1.09253	2.19605	2.29725	0.762243	9.66667	28	-1.42273	0.0942964	0.93226	17.7206	RAB38	21	6934489	6998696	+	702	protein_coding	PF00071:Ras family	Ras
ENSOARG00000026629	1	0	0	10	10	0	0.0687157	0	0	0.536236	0.560948	0	0.333333	6.66667	-4.03291	0.0943769	NA	3.17114	-	6	116370887	116371762	+	777	lincRNA	-	-
ENSOARG00000000336	1926	2038	2595	1902	2367	1421	20.8122	19.7831	23.6944	16.0388	20.8798	15.389	2186.33	1896.67	0.296907	0.0944318	0.93226	2014.7	GCC2	3	61775662	61808773	+	4941	protein_coding	PF01465:GRIP domain|PF16704:Rab binding domain	-
ENSOARG00000016743	301	245	272	445	364	337	26.0049	19.0144	19.8566	30.0019	25.6718	29.1791	272.667	382	-0.388898	0.0944436	0.93226	323.553	-	3	172842618	172849692	-	618	protein_coding	PF00808:Histone-like transcription factor (CBF/NF-Y) and archaeal histone	-
ENSOARG00000021387	0	0	0	8	3	2	0	0	0	2.39802	0.940697	0.76992	0	4.33333	-4.41389	0.0946189	NA	1.9983	RF00404	14	25747000	25747138	-	139	snoRNA	-	-
ENSOARG00000009881	212	235	145	301	605	146	21.9363	21.8436	12.6777	24.3049	51.1033	15.1403	197.333	350.667	-0.684862	0.0946248	0.93226	265.327	-	18	6432503	6544219	-	516	protein_coding	PF13855:Leucine rich repeat	-
ENSOARG00000015013	14	14	0	0	3	0	0.61827	0.555402	0	0	0.108153	0	9.33333	1	3.4115	0.0946987	0.93226	5.41568	-	1	225078853	225080061	+	1209	protein_coding	PF13445:RING-type zinc-finger|PF00643:B-box zinc finger	zf-B_box
ENSOARG00000001507	415	489	588	681	664	602	15.5821	16.4936	18.6553	19.9537	20.3522	22.6531	497.333	649	-0.310598	0.0949341	0.93226	565.327	SETD6	14	25720528	25723873	+	1422	protein_coding	PF09273:Rubisco LSMT substrate-binding|PF00856:SET domain	SET
ENSOARG00000026135	672	1253	1162	1395	1465	1269	28.521	47.7723	41.6724	46.203	50.7575	53.9773	1029	1376.33	-0.354957	0.0949539	0.93226	1182.97	-	21	48872155	49009414	-	1258	lincRNA	-	-
ENSOARG00000012998	607	948	800	889	1316	996	49.7834	69.8446	55.4412	56.8981	88.1086	81.867	785	1067	-0.373582	0.094962	0.93226	914.993	RHOF	17	53094875	53107235	+	651	protein_coding	PF00071:Ras family	Ras
ENSOARG00000010759	2187	2589	2527	3328	3021	2714	70.1733	74.625	68.5134	83.3311	79.1299	87.2744	2434.33	3021	-0.22767	0.0949828	0.93226	2694.31	PPP2R5A	12	69326137	69393221	-	1664	protein_coding	PF01603:Protein phosphatase 2A regulatory B subunit (B56 family)	-
ENSOARG00000004884	675	729	937	1017	1196	840	5.35428	5.19461	6.28034	6.29533	7.74453	6.67775	780.333	1017.67	-0.3	0.0950176	0.93226	883.806	-	23	7193667	7302520	+	6731	protein_coding	PF14726:Rotatin, an armadillo repeat protein, centriole functioning	-
ENSOARG00000019832	16	16	4	3	4	3	2.00534	1.80142	0.423617	0.293419	0.409255	0.376827	12	3.33333	1.96786	0.095082	0.93226	7.90615	RAB42	2	237721084	237721509	-	426	protein_coding	PF00071:Ras family	Ras
ENSOARG00000012026	237	205	364	247	196	175	13.3904	10.4046	17.3777	10.8904	9.03998	9.90915	268.667	206	0.464588	0.0951248	0.93226	234.672	ABHD11	24	33455333	33458008	+	945	protein_coding	PF00561:alpha/beta hydrolase fold	Abhydrolase_1
ENSOARG00000011728	1948	2377	2652	3055	2956	2668	24.3635	26.706	28.0266	29.8169	30.1802	33.4418	2325.67	2893	-0.240261	0.09519	0.93226	2575.6	BCL9L	15	28981914	28992197	-	4269	protein_coding	PF11502:B-cell lymphoma 9 protein	-
ENSOARG00000015210	0	0	1	10	10	0	0	0	0.0277975	0.256719	0.26855	0	0.333333	6.66667	-4.03288	0.0952546	NA	3.14266	-	4	35526282	35528145	-	1623	protein_coding	PF00429:ENV polyprotein (coat polyprotein)	-
ENSOARG00000003468	1198	1257	1311	1459	1035	752	5.98127	5.63768	5.53078	5.6845	4.21836	3.76277	1255.33	1082	0.326023	0.0952684	0.93226	1152.41	WDFY3	6	99097590	99345501	-	10694	protein_coding	PF14844:PH domain associated with Beige/BEACH|PF01363:FYVE zinc finger|PF02138:Beige/BEACH domain	Beach
ENSOARG00000005241	78	96	112	138	140	157	5.95791	6.58718	7.22877	8.22581	8.7296	12.0186	95.3333	145	-0.547549	0.0953049	0.93226	119.143	2019-03-09	3	161610573	161612208	-	699	protein_coding	PF12906:RING-variant domain	-
ENSOARG00000018463	61	84	25	101	83	141	1.27025	1.57133	0.439891	1.64127	1.41092	2.9426	56.6667	108.333	-0.86925	0.0953621	0.93226	83.1375	KIF3C	3	33109792	33144386	-	2564	protein_coding	PF00225:Kinesin motor domain	Kinesin
ENSOARG00000014248	436	288	375	248	343	262	16.2676	9.65291	11.8227	7.22086	10.4471	9.79697	366.333	284.333	0.457945	0.0953653	0.93226	326.25	LAYN	15	21286330	21311457	+	1431	protein_coding	PF00059:Lectin C-type domain	Lectin_C
ENSOARG00000020157	160	211	242	348	207	352	2.20571	2.61301	2.81898	3.74377	2.32952	4.86324	204.333	302.333	-0.515379	0.0954168	0.93226	251.521	-	JH924836.1	2159	6533	-	3873	protein_coding	PF00801:PKD domain	-
ENSOARG00000010529	0	0	0	3	1	8	0	0	0	0.0593808	0.0207058	0.203361	0	4	-4.46434	0.0954245	NA	2.08415	KAZN	12	50443342	50581585	-	2105	protein_coding	PF07647:SAM domain (Sterile alpha motif)|PF00536:SAM domain (Sterile alpha motif)	SAM_1
ENSOARG00000007301	788	784	963	913	789	368	20.5034	18.325	21.1725	18.5383	16.7588	9.59623	845	690	0.416164	0.0954275	0.93226	752.785	SLC44A1	2	17572929	17681142	-	2052	protein_coding	PF04515:Plasma-membrane choline transporter	-
ENSOARG00000003251	8	92	45	58	78	184	0.106095	1.09602	0.504269	0.600249	0.844431	2.44554	48.3333	106.667	-1.18261	0.0955292	0.93226	78.7519	-	3	206712983	206746704	+	4026	protein_coding	PF00530:Scavenger receptor cysteine-rich domain	SRCR
ENSOARG00000019197	3327	5185	3826	6163	6647	3838	106.688	149.362	103.67	154.225	174.002	123.345	4112.67	5549.33	-0.328862	0.0955476	0.93226	4724.14	IL2RB	3	180361987	180373738	-	1665	protein_coding	PF00041:Fibronectin type III domain	fn3
ENSOARG00000016689	10	29	21	26	52	53	0.0358168	0.0933068	0.0635554	0.0726708	0.152039	0.190246	20	43.6667	-1.09917	0.0957048	0.93226	31.6695	FAT4	17	32000718	32186231	-	14907	protein_coding	PF07645:Calcium-binding EGF domain|PF00028:Cadherin domain|PF02210:Laminin G domain	Cadherin
ENSOARG00000016510	40426	26095	37377	36267	33484	17334	159.47	92.4708	124.586	111.643	107.826	68.5284	34632.7	29028.3	0.385604	0.0957674	0.93226	31452.9	-	15	45615655	45753809	+	13535	protein_coding	PF05879:Root hair defective 3 GTP-binding protein (RHD3)	-
ENSOARG00000001790	1685	2583	1998	2755	2735	2655	81.7127	112.523	81.8713	104.258	108.271	129.035	2088.67	2715	-0.306821	0.095781	0.93226	2377.92	TREML2	20	15201231	15208369	-	1101	protein_coding	-	-
ENSOARG00000010819	93	123	161	79	52	106	14.2686	16.9524	20.8723	9.45855	6.51279	16.2988	125.667	79	0.697715	0.0957942	0.93226	102.648	-	24	30242995	30243342	+	348	protein_coding	PF01248:Ribosomal protein L7Ae/L30e/S12e/Gadd45 family	-
ENSOARG00000008411	363	481	434	376	415	277	4.99647	5.94745	5.0477	4.03873	4.66307	3.82112	426	356	0.351658	0.0958443	0.93226	386.79	SLC10A7	17	11515055	11812592	+	3879	protein_coding	PF13593:SBF-like CPA transporter family (DUF4137)	-
ENSOARG00000004449	322	485	454	561	628	499	13.7428	18.5947	16.3728	18.6845	21.8799	21.3439	420.333	562.667	-0.345197	0.0959929	0.933188	483.923	NEU1	20	26622429	26625743	+	1251	protein_coding	PF13088:BNR repeat-like domain	-
ENSOARG00000011904	27	29	26	52	46	58	1.02897	0.992808	0.837257	1.54647	1.43108	2.21524	27.3333	52	-0.859304	0.0961646	0.933886	39.4393	CA9	2	52546134	52551851	-	1401	protein_coding	PF00194:Eukaryotic-type carbonic anhydrase	-
ENSOARG00000007942	533	595	534	868	596	809	10.2441	10.2728	8.67226	13.0186	9.35098	15.5828	554	757.667	-0.37838	0.0962047	0.933886	652.132	RUBCNL	10	16725204	16765228	-	2778	protein_coding	PF13901:Putative zinc-RING and/or ribbon	-
ENSOARG00000005164	314	1230	953	1698	1317	903	70.7389	248.921	181.413	298.515	242.204	203.878	832.333	1306	-0.571384	0.0963754	0.934272	1032.64	HCST	14	45712008	45713276	+	237	protein_coding	-	-
ENSOARG00000025465	214	76	92	140	59	29	16.23	5.17781	5.89574	8.28576	3.65277	2.20422	127.333	76	0.941207	0.0964321	0.934272	102.012	-	12	68996915	68997668	-	704	lincRNA	-	-
ENSOARG00000013845	999	638	376	661	555	274	39.9541	22.9216	12.7066	20.6299	18.1199	10.9825	671	496.667	0.600679	0.0965015	0.934272	584.901	FADS2	21	39754363	39790860	+	1335	protein_coding	PF00487:Fatty acid desaturase	-
ENSOARG00000004010	1462	1460	1950	2266	2256	1681	37.985	34.0758	42.8101	45.9436	47.8487	43.771	1624	2067.67	-0.260492	0.0965461	0.934272	1814.11	SNRK	19	15168804	15217301	+	2055	protein_coding	PF00069:Protein kinase domain	Pkinase
ENSOARG00000013031	17	5	22	5	7	1	0.86198	0.227744	0.942579	0.197842	0.289743	0.0508162	14.6667	4.33333	1.89745	0.0967008	0.934272	9.46657	TMEM255A	X	98982513	99028598	-	1053	protein_coding	PF14967:FAM70 protein	-
ENSOARG00000014904	1311	1351	1205	1608	1790	1629	10.7275	9.93071	8.33163	10.2679	11.9568	13.3589	1289	1675.67	-0.295951	0.0968384	0.934272	1473.21	TENT4A	16	66303044	66322108	-	6525	protein_coding	PF01909:Nucleotidyltransferase domain|PF03828:Cid1 family poly A polymerase	NTP_transf_2
ENSOARG00000014217	1442	1587	1867	2736	2626	1339	55.7908	55.1573	61.0364	82.6064	82.939	51.9197	1632	2233.67	-0.339717	0.0968514	0.934272	1879.73	-	15	43289050	43290434	+	1380	pseudogene	PF03143:Elongation factor Tu C-terminal domain|PF00009:Elongation factor Tu GTP binding domain|PF03144:Elongation factor Tu domain 2	GTP_EFTU
ENSOARG00000018736	2624	1025	1322	1409	529	757	86.9651	30.5164	37.022	36.4412	14.3121	25.1438	1657	898.333	1.0243	0.0969505	0.934272	1297.49	BPI	13	66754362	66785791	+	1611	protein_coding	PF02886:LBP / BPI / CETP family, C-terminal domain|PF01273:LBP / BPI / CETP family, N-terminal domain	-
ENSOARG00000019962	25	38	6	36	74	55	0.192723	0.263152	0.0390834	0.216569	0.465685	0.424923	23	55	-1.16446	0.0969721	0.934272	38.7955	MEIS1	3	41648874	41799894	-	6926	protein_coding	PF05920:Homeobox KN domain|PF16493:N-terminal of Homeobox Meis and PKNOX1	Coprinus_mating
ENSOARG00000001955	388	405	538	605	608	542	9.08602	8.51973	10.6456	11.056	11.6228	12.7202	443.667	585	-0.324563	0.0969896	0.934272	507.472	NEK4	19	48108387	48131408	+	2280	protein_coding	PF00069:Protein kinase domain	Pkinase
ENSOARG00000004315	1106	1695	1483	2058	1691	1826	31.7995	43.7787	36.029	46.1754	39.6894	52.6162	1428	1858.33	-0.31087	0.0970416	0.934272	1623.92	ACSF2	11	35776073	35807792	-	1857	protein_coding	PF13193:AMP-binding enzyme C-terminal domain|PF00501:AMP-binding enzyme	AMP-binding
ENSOARG00000025289	0	0	0	3	5	4	0	0	0	0.0981906	0.171193	0.168136	0	4	-4.372	0.0970454	NA	1.94756	-	5	9963163	9966407	+	1273	lincRNA	-	-
ENSOARG00000004595	4	13	6	0	3	0	0.659161	1.92444	0.835468	0	0.403571	0	7.66667	1	3.05461	0.0971296	NA	4.33142	OXT	13	51437893	51438654	-	324	protein_coding	PF00184:Neurohypophysial hormones, C-terminal Domain	-
ENSOARG00000006850	522	553	722	819	875	651	12.1441	11.5571	14.1931	14.8689	16.6176	15.1785	599	781.667	-0.300414	0.0971826	0.934272	678.65	AVL9	4	63941506	63992842	-	2295	protein_coding	PF09794:Transport protein Avl9	-
ENSOARG00000009855	92	58	99	32	61	57	24.8084	14.0497	22.5576	6.73382	13.4279	15.4042	83	50	0.792006	0.0972399	0.934272	67.1342	-	2	164351328	164351626	-	198	protein_coding	-	-
ENSOARG00000012044	29	1	4	2	2	3	0.89917	0.027853	0.104797	0.048392	0.0506221	0.093222	11.3333	2.33333	2.42904	0.0972671	0.934272	7.3627	TSPEAR	1	262550748	262575133	-	1722	protein_coding	PF03736:EPTP domain	-
ENSOARG00000013426	561	353	526	418	422	323	6.66955	3.76996	5.28404	3.87802	4.09555	3.84848	480	387.667	0.41001	0.0973132	0.934272	432.548	TAF1A	12	24145752	24178280	-	4491	protein_coding	PF14929:TAF RNA Polymerase I subunit A	-
ENSOARG00000002162	0	0	0	5	2	5	0	0	0	0.202064	0.0845502	0.259503	0	4	-4.38619	0.0973194	NA	1.96828	ETNK2	12	1262029	1276284	-	1031	protein_coding	PF01633:Choline/ethanolamine kinase	Choline_kinase
ENSOARG00000011077	0	0	0	5	2	5	0	0	0	0.132524	0.0554524	0.170195	0	4	-4.38619	0.0973194	NA	1.96828	-	16	38069831	38095503	+	1572	protein_coding	PF00201:UDP-glucoronosyl and UDP-glucosyl transferase	UDPGT
ENSOARG00000018306	3605	2914	3148	3407	2842	2266	76.1989	55.3301	56.2244	56.1973	49.0381	48.0017	3222.33	2838.33	0.292025	0.0974321	0.934272	3011.78	ARHGAP17	24	22575927	22630268	-	2526	protein_coding	PF00620:RhoGAP domain|PF03114:BAR domain	RhoGAP
ENSOARG00000010269	262	220	290	277	165	157	7.84561	5.91802	7.33787	6.473	4.03344	4.71171	257.333	199.667	0.469508	0.0974455	0.934272	226.446	FAM114A1	6	58062749	58127485	+	1783	protein_coding	PF05334:Protein of unknown function (DUF719)	-
ENSOARG00000008229	459	371	492	666	705	447	60.511	43.9364	54.8067	68.5166	75.8713	59.0586	440.667	606	-0.355131	0.097491	0.934272	513.7	IFITM5	21	49789518	49792831	+	405	protein_coding	PF04505:Interferon-induced transmembrane protein	-
ENSOARG00000012990	797	1302	1185	1601	1296	1434	41.7191	61.2232	52.4133	65.3985	55.3794	75.228	1094.67	1443.67	-0.334656	0.0975684	0.934272	1253.2	PLSCR3	11	26703973	26708322	-	1020	protein_coding	PF03803:Scramblase	Scramblase
ENSOARG00000000734	1	2	2	8	4	14	0.0450186	0.0808818	0.0760797	0.281049	0.147	0.631646	1.66667	8.66667	-2.37545	0.0976932	0.934272	5.22949	-	JH923530.1	2099	7200	+	1186	protein_coding	PF05461:Apolipoprotein L	-
ENSOARG00000017928	142	202	147	280	350	144	7.34658	9.38809	6.4263	11.3046	14.7819	7.46643	163.667	258	-0.537687	0.0977473	0.934272	204.711	-	4	82704772	82723359	+	1032	protein_coding	PF07686:Immunoglobulin V-set domain|PF07654:Immunoglobulin C1-set domain	V-set
ENSOARG00000018970	343	514	587	424	482	247	6.67888	8.99086	9.65815	6.44281	7.66166	4.82014	481.333	384.333	0.419214	0.0977834	0.934272	424.385	CIP2A	1	171769119	171794288	-	2742	protein_coding	-	-
ENSOARG00000008548	118	210	167	122	118	119	3.0778	4.92047	3.68063	2.48324	2.51251	3.11071	165	119.667	0.529377	0.0977923	0.934272	141.619	-	13	62561490	62564343	-	2047	protein_coding	PF02319:E2F/DP family winged-helix DNA-binding domain	E2F_TDP
ENSOARG00000001274	3255	5904	7827	8067	6926	8052	100.749	164.158	204.706	194.85	174.999	249.773	5662	7681.67	-0.399387	0.0978351	0.934272	6570.47	CDC25B	13	50726486	50734786	-	1725	protein_coding	PF00581:Rhodanese-like domain|PF06617:M-phase inducer phosphatase	Rhodanese
ENSOARG00000001480	199	303	271	330	345	416	61.0633	83.5216	70.2657	79.0208	86.4198	127.931	257.667	363.667	-0.446862	0.0979191	0.934285	309.185	POLR2K	9	76826125	76827336	-	174	protein_coding	-	-
ENSOARG00000020633	56	53	89	135	116	77	2.38433	2.02714	3.20196	4.48552	4.03184	3.28567	66	109.333	-0.633317	0.0979968	0.934332	85.1583	L2HGDH	7	40246418	40290279	-	1254	protein_coding	PF01266:FAD dependent oxidoreductase	DAO
ENSOARG00000001785	461	398	375	574	663	469	38.1608	29.5957	26.2298	37.0791	44.802	38.9084	411.333	568.667	-0.363869	0.0980307	0.934332	484.401	TM2D2	26	32743826	32749885	-	645	protein_coding	PF05154:TM2 domain	TM2
ENSOARG00000000196	151	236	279	156	162	172	5.6458	7.92664	8.81454	4.5517	4.94459	6.44511	222	163.333	0.493637	0.0981407	0.934484	191.391	NAPRT	9	14073117	14076214	+	1428	protein_coding	-	-
ENSOARG00000017705	272	221	218	447	355	245	9.91984	7.2403	6.71798	12.7216	10.5689	8.95479	237	349	-0.43697	0.0983574	0.934484	287.331	NT5C3B	11	41503155	41511329	-	1464	protein_coding	PF05822:Pyrimidine 5'-nucleotidase (UMPH-1)	-
ENSOARG00000002669	0	0	17	13	10	54	0	0	0.744621	0.525876	0.423161	2.80535	5.66667	25.6667	-2.31333	0.0984394	0.934484	16.1912	-	JH922496.1	1598	2843	-	1030	protein_coding	PF07686:Immunoglobulin V-set domain	V-set
ENSOARG00000019403	274	334	386	436	491	402	10.5551	11.5582	12.5646	13.1069	15.4405	15.52	331.333	443	-0.344666	0.0984723	0.934484	381.656	REM2	7	21567500	21571456	-	1386	protein_coding	PF00071:Ras family	Ras
ENSOARG00000006876	4658	3377	5784	4423	4695	2418	33.7954	22.0099	35.4595	25.0423	27.8074	17.582	4606.33	3845.33	0.372843	0.0984905	0.934484	4161.41	BAZ1A	18	44016642	44094936	-	7359	protein_coding	PF00628:PHD-finger|PF00439:Bromodomain|PF02791:DDT domain|PF10537:ATP-utilising chromatin assembly and remodelling N-terminal|PF15612:WSTF, HB1, Itc1p, MBD9 motif 1|PF15613:Williams-Beuren syndrome DDT (WSD), D-TOX E motif	Bromodomain
ENSOARG00000016618	878	1404	1499	1823	1604	1502	17.9473	25.781	25.8912	29.0797	26.7654	30.77	1260.33	1643	-0.314591	0.0985132	0.934484	1427.08	RAP1GAP2	11	23434455	23493240	+	2612	protein_coding	PF02145:Rap/ran-GAP	-
ENSOARG00000013201	574	528	458	730	800	596	24.7953	20.489	16.7175	24.6083	28.2108	25.8023	520	708.667	-0.344265	0.0985153	0.934484	607.757	DPAGT1	15	29163826	29167984	-	1236	protein_coding	PF00953:Glycosyl transferase family 4	Glycos_transf_4
ENSOARG00000019064	967	1023	1050	1115	791	739	32.5948	30.976	29.906	29.329	21.7653	24.9643	1013.33	881.667	0.296615	0.0985751	0.934484	939.033	-	3	137064274	137086490	+	1584	protein_coding	PF00025:ADP-ribosylation factor family|PF00110:wnt family	wnt
ENSOARG00000019488	1840	2203	1829	2117	1616	1434	38.7387	41.6649	32.5378	34.7815	27.7738	30.2573	1957.33	1722.33	0.282379	0.098608	0.934484	1824.56	ATP6V1A	1	176799291	176860593	+	2536	protein_coding	PF00006:ATP synthase alpha/beta family, nucleotide-binding domain|PF16886:ATPsynthase alpha/beta subunit N-term extension|PF02874:ATP synthase alpha/beta family, beta-barrel domain	ATP-synt_ab
ENSOARG00000015410	64	69	157	64	65	53	2.3309	2.25746	4.83158	1.81896	1.93251	1.93452	96.6667	60.6667	0.730904	0.0986947	0.934484	77.4514	METTL15	15	56955678	57179438	+	1466	protein_coding	PF01795:MraW methylase family	-
ENSOARG00000001589	1285	2902	2587	2673	2947	3839	66.2887	134.481	112.766	107.606	124.103	198.476	2258	3153	-0.455393	0.0988152	0.934484	2691.37	-	4	112726600	112731983	+	1035	protein_coding	PF04548:AIG1 family	-
ENSOARG00000026418	2	18	9	3	0	2	0.145681	1.17781	0.553939	0.170527	0	0.146001	9.66667	1.66667	2.57902	0.0988245	0.934484	5.62434	-	25	45185753	45192629	-	733	lincRNA	-	-
ENSOARG00000011764	349	391	514	580	656	446	3.20996	3.23058	3.9947	4.16296	4.92544	4.11115	418	560.667	-0.339089	0.0988668	0.934484	479.814	CROCC	2	248440836	248489150	-	5805	protein_coding	PF15035:Ciliary rootlet component, centrosome cohesion	-
ENSOARG00000018787	0	5	0	5	5	23	0	0.163139	0	0.141719	0.14825	0.837222	1.66667	11	-2.77418	0.0989002	0.934484	6.62596	-	X	121069888	121111367	+	1470	protein_coding	PF05064:Nsp1-like C-terminal region	-
ENSOARG00000015650	4	10	21	4	3	2	0.132899	0.298462	0.589559	0.10371	0.0813671	0.0665954	11.6667	3	2.01803	0.099025	0.934693	7.15432	DPYS	9	72759035	72856330	+	1607	protein_coding	PF01979:Amidohydrolase family	Amidohydro_1
ENSOARG00000017774	826	1193	700	1293	1276	1168	43.8388	56.8785	31.3923	53.5522	55.2836	62.1263	906.333	1245.67	-0.372361	0.099029	0.934693	1066.07	-	12	27111172	27114693	-	1006	protein_coding	PF14748:Pyrroline-5-carboxylate reductase dimerisation|PF03807:NADP oxidoreductase coenzyme F420-dependent	F420_oxidored
ENSOARG00000014679	63	42	53	80	106	85	2.89475	1.7336	2.05775	2.86854	3.97597	3.9142	52.6667	90.3333	-0.688171	0.0991078	0.93493	70.8771	-	AMGL01127455.1	21	2495	+	1162	protein_coding	-	-
ENSOARG00000009731	0	0	0	9	1	3	0	0	0	0.672025	0.0781104	0.287685	0	4.33333	-4.43209	0.0991542	NA	2.02574	RGS13	12	10698559	10716437	-	558	protein_coding	PF00615:Regulator of G protein signaling domain	RGS
ENSOARG00000016508	0	0	0	3	0	11	0	0	0	0.308634	0	1.45334	0	4.66667	-4.72261	0.0992274	NA	2.49177	-	5	15785723	15786127	-	405	protein_coding	PF01920:Prefoldin subunit	-
ENSOARG00000013732	279	389	422	536	499	419	7.69839	9.64215	9.83909	11.5415	11.2399	11.5868	363.333	484.667	-0.337785	0.0992564	0.93493	416.481	ARHGAP18	8	54943216	55143088	-	1935	protein_coding	PF00620:RhoGAP domain	RhoGAP
ENSOARG00000020150	1481	1399	1427	1646	1207	887	30.864	26.1905	25.1286	26.7687	20.5339	18.5257	1435.67	1246.67	0.318492	0.0992676	0.93493	1326.03	PARP9	1	185222510	185246839	-	2562	protein_coding	PF01661:Macro domain	A1pp
ENSOARG00000006169	0	0	0	2	0	12	0	0	0	0.301924	0	2.3265	0	4.66667	-4.7454	0.0992819	NA	2.53263	-	X	70595718	70595993	-	276	protein_coding	-	-
ENSOARG00000011304	0	0	0	2	0	12	0	0	0	0.0401016	0	0.309005	0	4.66667	-4.7454	0.0992819	NA	2.53263	-	X	10849552	10899349	-	2078	protein_coding	PF00629:MAM domain, meprin/A5/mu|PF07645:Calcium-binding EGF domain	EGF_CA
ENSOARG00000014320	0	2	0	3	9	8	0	0.0761316	0	0.0992036	0.311326	0.339742	0.666667	6.66667	-3.2877	0.0992911	NA	3.64032	GPR151	5	55164839	55166098	-	1260	protein_coding	PF00001:7 transmembrane receptor (rhodopsin family)	7tm_1
ENSOARG00000013097	278	265	291	195	265	202	6.63819	5.68433	5.87144	3.63362	5.16556	4.83404	278	220.667	0.416495	0.0993468	0.935173	248.834	MIGA1	1	53617797	53691338	+	2236	protein_coding	PF10265:Mitoguardin	-
ENSOARG00000016667	12	7	33	31	42	47	0.191656	0.100431	0.44535	0.386369	0.547591	0.752301	17.3333	40	-1.18454	0.0996971	0.93758	28.3308	AP1M2	5	12756700	12768626	-	3343	protein_coding	PF00928:Adaptor complexes medium subunit family|PF01217:Clathrin adaptor complex small chain	Adap_comp_sub
ENSOARG00000021226	13	0	47	4	8	1	6.48689	0	19.817	1.55759	3.25874	0.500088	20	4.33333	2.2969	0.0999053	0.93758	11.8374	RF00026	25	41212675	41212781	+	107	snRNA	-	-
ENSOARG00000000480	333	356	508	461	290	175	5.24162	5.03384	6.75665	5.66268	3.72637	2.76066	399	308.667	0.484818	0.0999291	0.93758	346.199	MOCS1	20	13876968	13911663	-	3392	protein_coding	PF06463:Molybdenum Cofactor Synthesis C|PF13353:4Fe-4S single cluster domain|PF04055:Radical SAM superfamily|PF01967:MoaC family	Radical_SAM
ENSOARG00000015792	4850	5841	6591	5149	5752	4601	50.9847	55.1587	58.5459	42.2398	49.361	48.4735	5760.67	5167.33	0.233443	0.0999346	0.93758	5412.76	EHBP1L1	21	43068571	43084786	+	5079	protein_coding	PF12130:Protein of unknown function (DUF3585)|PF00307:Calponin homology (CH) domain	CH
ENSOARG00000023715	69	110	105	57	68	65	11.1301	15.9393	14.3115	7.17503	8.95415	10.5079	94.6667	63.3333	0.639815	0.100106	0.93758	78.7247	RF00100	20	25015205	25015535	+	331	misc_RNA	-	-
ENSOARG00000015214	2506	2940	2808	3031	2488	1926	24.5011	25.8214	23.1979	23.1255	19.8574	18.8718	2751.33	2481.67	0.248383	0.100106	0.93758	2585.21	P2RX4	17	53511024	53531260	-	5461	protein_coding	PF00864:ATP P2X receptor	-
ENSOARG00000017664	2723	2091	3889	2559	3086	1439	16.3779	11.2978	19.7649	12.011	15.1521	8.67411	2901	2361.33	0.403703	0.100186	0.93758	2585.45	CHD9	14	21124601	21255397	+	8877	protein_coding	PF00176:SNF2 family N-terminal domain|PF00271:Helicase conserved C-terminal domain|PF07533:BRK domain|PF00385:Chromo (CHRromatin Organisation MOdifier) domain	SNF2_N
ENSOARG00000005631	683	675	953	901	929	1363	11.8746	10.5422	14.0003	12.2242	13.185	23.7491	770.333	1064.33	-0.431352	0.100214	0.93758	918.768	PHF19	2	2621506	2639926	+	3071	protein_coding	PF00628:PHD-finger	PHD
ENSOARG00000025091	37	12	25	10	12	10	14.4198	4.20113	8.23271	3.04128	3.81772	3.9058	24.6667	10.6667	1.31716	0.100294	0.93758	18.0158	RF00406	2	219245664	219245800	+	137	snoRNA	-	-
ENSOARG00000018235	2	5	0	13	9	13	0.0581613	0.130618	0	0.295017	0.213655	0.378879	2.33333	11.6667	-2.2384	0.100298	0.93758	6.90881	PLPPR2	5	13430918	13436819	+	1836	protein_coding	PF01569:PAP2 superfamily	-
ENSOARG00000009501	191	326	292	202	267	153	13.5071	20.7098	17.4486	11.1476	15.4137	10.8436	269.667	207.333	0.465367	0.100476	0.938378	235.181	-	14	8152352	8162610	-	755	protein_coding	PF10175:M-phase phosphoprotein 6	-
ENSOARG00000010344	39	58	12	79	141	34	0.43663	0.583319	0.113521	0.690203	1.28865	0.381489	36.3333	84.6667	-1.06441	0.100491	0.938378	58.2823	LTBP1	3	90489032	90947819	-	4769	protein_coding	PF00683:TB domain|PF12662:Complement Clr-like EGF-like|PF07645:Calcium-binding EGF domain	EGF_CA
ENSOARG00000005260	0	0	0	4	0	10	0	0	0	0.239457	0	0.768814	0	4.66667	-4.69955	0.10051	NA	2.45091	OVOL3	14	45892869	45894717	+	696	protein_coding	-	-
ENSOARG00000003390	6	1	4	26	8	11	0.12436	0.0186191	0.0700548	0.420537	0.135359	0.228495	3.66667	15	-1.89364	0.100559	0.938519	8.98573	MAP3K21	25	6251567	6308848	+	2576	protein_coding	PF07714:Protein tyrosine kinase	Pkinase_Tyr
ENSOARG00000008173	6	2	13	1	2	0	0.237298	0.0710561	0.434443	0.0308634	0.0645713	0	7	1	2.92398	0.100576	NA	3.95818	KCNK2	12	66477254	66608750	-	1350	protein_coding	PF07885:Ion channel	Ion_trans_2
ENSOARG00000006007	22	31	29	55	55	44	0.895977	1.13413	0.997973	1.74798	1.82853	1.79589	27.3333	51.3333	-0.826344	0.100627	0.938646	38.5131	NGFR	11	36636453	36647343	-	1311	protein_coding	PF00531:Death domain	Death
ENSOARG00000000333	43	99	71	274	116	45	0.479202	0.991093	0.668584	2.38288	1.0553	0.502593	71	145	-0.884555	0.100871	0.939208	101.909	ADAMTS7	18	29375835	29423578	+	4791	protein_coding	PF05986:ADAM-TS Spacer 1|PF00090:Thrombospondin type 1 domain|PF01421:Reprolysin (M12B) family zinc metalloprotease|PF01562:Reprolysin family propeptide	TSP_1
ENSOARG00000006139	833	1816	771	1931	4041	1237	26.9549	52.7883	21.0811	48.7613	106.745	40.1159	1140	2403	-0.957322	0.100884	0.939208	1710.95	PRF1	25	26597136	26599574	-	1650	protein_coding	PF01823:MAC/Perforin domain|PF00168:C2 domain	C2
ENSOARG00000011918	118	181	151	206	275	181	5.84983	8.06062	6.32535	7.96945	11.1291	8.99276	150	220.667	-0.473122	0.100921	0.939208	182.017	ARHGEF39	2	52560703	52563910	+	1077	protein_coding	PF00621:RhoGEF domain	RhoGEF
ENSOARG00000003421	8253	4020	3379	4137	2686	2718	101.391	44.3651	35.077	39.6618	26.9376	33.4649	5217.33	3180.33	0.852539	0.100994	0.939208	4267.32	LAP3	6	37092323	37118578	+	4346	protein_coding	PF02789:Cytosol aminopeptidase family, N-terminal domain|PF00883:Cytosol aminopeptidase family, catalytic domain	-
ENSOARG00000001519	2044	1874	2000	1810	2108	1299	69.556	57.2865	57.5083	48.0654	58.5586	44.3013	1972.67	1739	0.2874	0.101009	0.939208	1839.5	TRIM38	20	30859856	30873824	-	1569	protein_coding	PF15227:zinc finger of C3HC4-type, RING|PF00622:SPRY domain|PF00643:B-box zinc finger|PF13765:SPRY-associated domain	SPRY
ENSOARG00000003700	133	86	223	100	124	75	10.1156	5.8758	14.3315	5.93526	7.69889	5.71682	147.333	99.6667	0.647472	0.10116	0.93939	121.952	-	1	22257936	22260133	-	702	protein_coding	PF01963:TraB family	-
ENSOARG00000002631	58	119	141	53	40	89	1.80043	3.31836	3.6984	1.28388	1.01362	2.7688	106	60.6667	0.808138	0.101165	0.93939	83.495	-	JH921965.1	3448	5276	+	1720	protein_coding	PF07686:Immunoglobulin V-set domain	V-set
ENSOARG00000004887	265	148	235	189	142	149	4.93165	2.47421	3.69539	2.74478	2.15725	2.77898	216	160	0.530324	0.101211	0.93939	188.402	TTYH3	24	40571285	40593681	+	2869	protein_coding	PF04906:Tweety	-
ENSOARG00000018490	20	0	0	1	0	0	1.36378	0	0	0.0532127	0	0	6.66667	0.333333	4.42696	0.101248	NA	3.8742	-	12	78229558	78231256	+	783	protein_coding	PF00168:C2 domain	C2
[truncated: 17,455 more rows]

## Sheet: Table 2
Table 2 Differential expression of novel transcript in ovine Peripheral Blood Mononuclear Cells for Tg and WT individuals
[truncated: 3,063 more rows]
